# Supplementary material for: Activation of Saturated Fluorocarbons to Synthesize Spirobiindanes, Monofluoroalkenes, and Indane Derivatives
Source: PubMed Central journal article supplement (PMC6612000; doi:10.1016/j.isci.2019.06.018), 2019-06-19
Supplement: mmc1.pdf [file mmc1.pdf]

**ISCI, Volume 17**

**Supplemental Information**

**Activation of Saturated Fluorocarbons to Synthesize  
Spirobiindanes, Monofluoroalkenes, and Indane  
Derivatives**

**Jiandong Wang, Yuta Ogawa, and Norio Shibata**

Supplemental Figures

Figure S1. <sup>1</sup>H NMR spectrum of **2a**, related to Figure 2

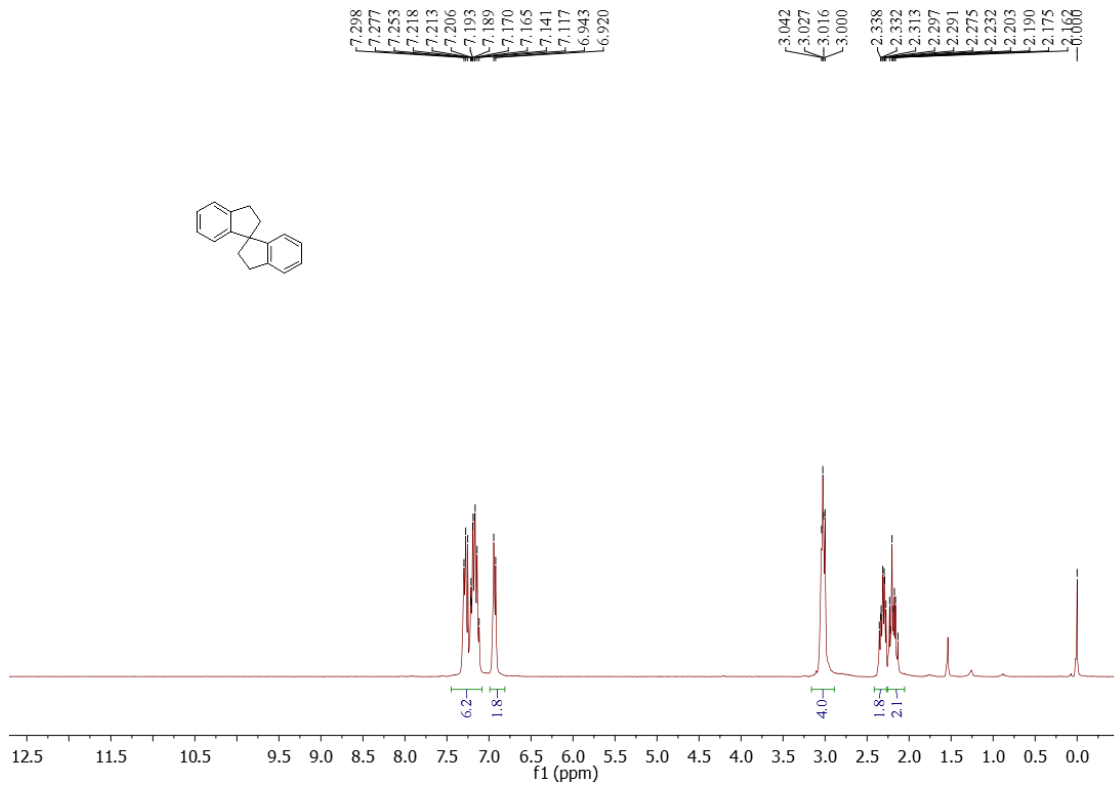

Figure S2. <sup>13</sup>C NMR spectrum of **2a**, related to Figure 2

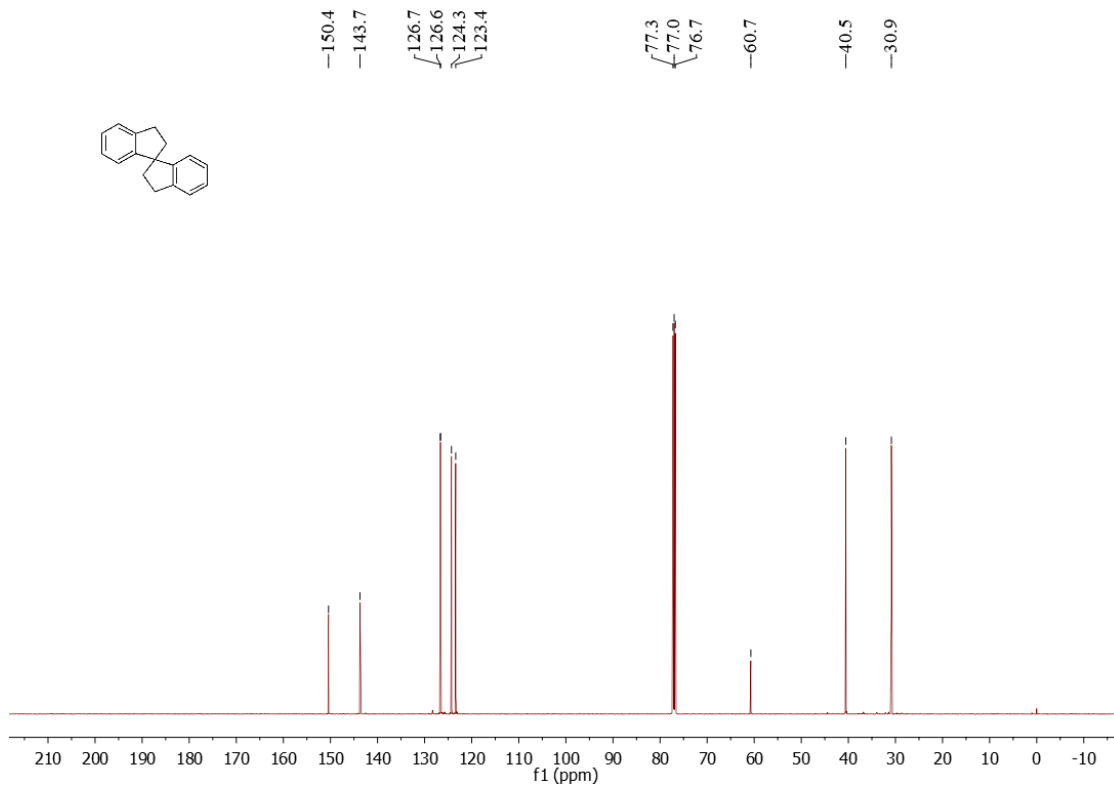

Figure S3. <sup>1</sup>H NMR spectrum of **2b**, related to Figure 2

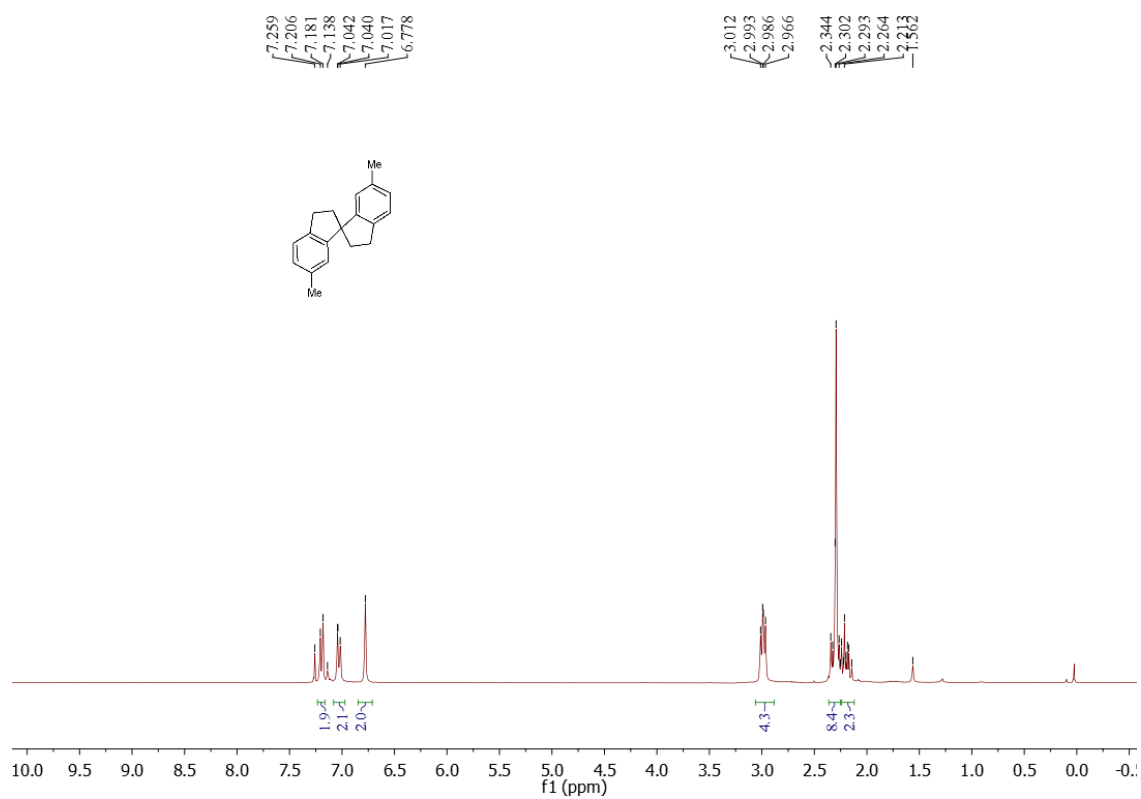

Figure S4. <sup>13</sup>C NMR spectrum of **2b**, related to Figure 2

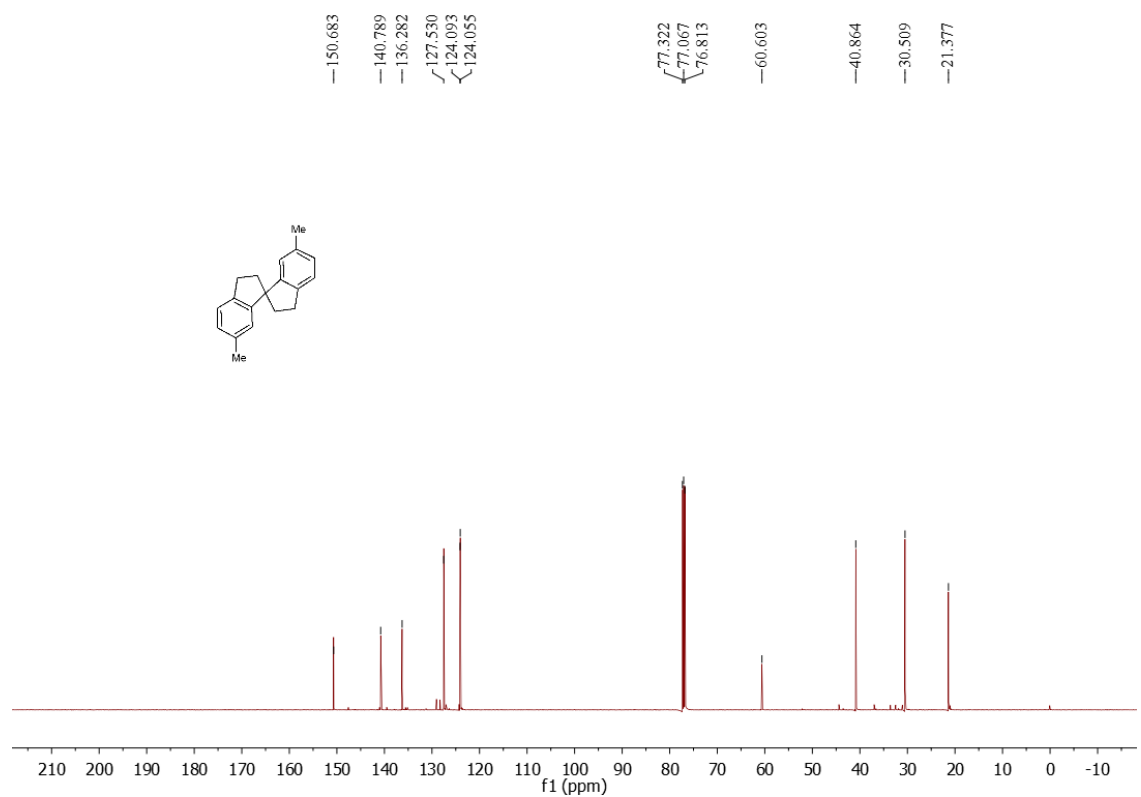

Figure S5. <sup>1</sup>H NMR spectrum of **2c**, related to Figure 2

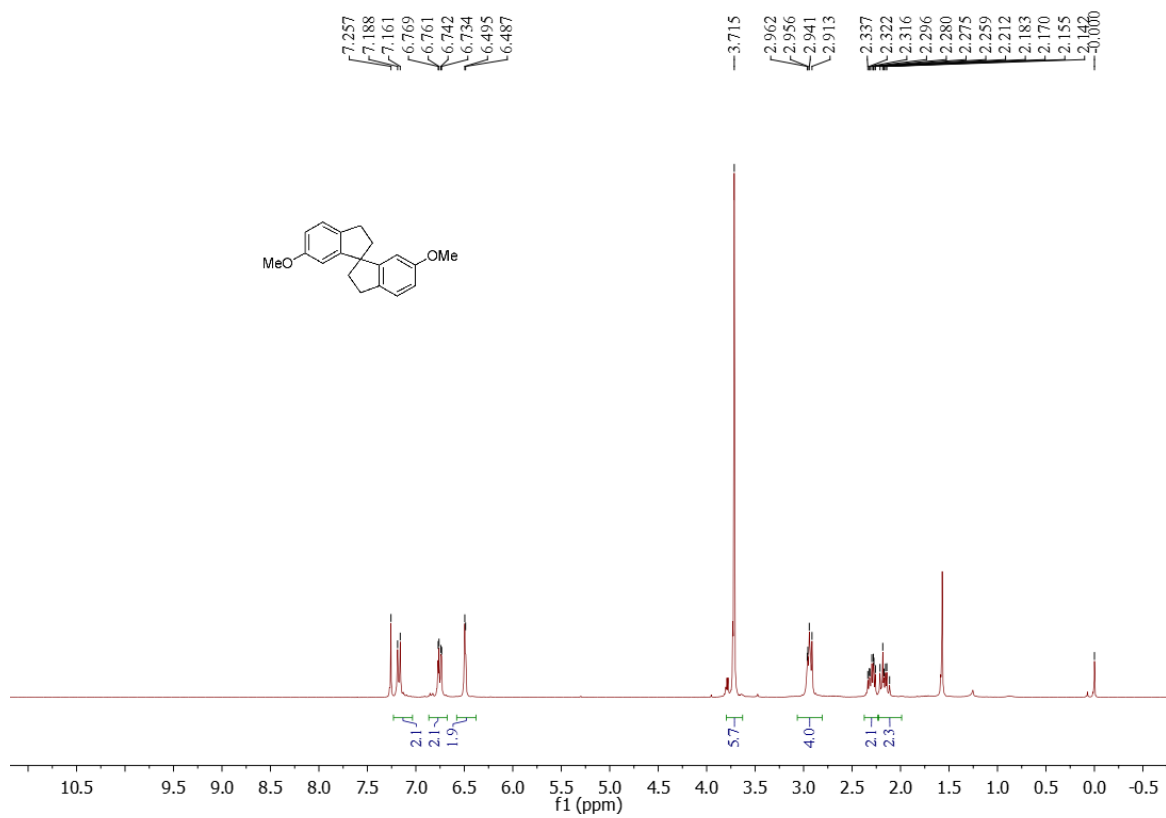

Figure S6. <sup>13</sup>C NMR spectrum of **2c**, related to Figure 2

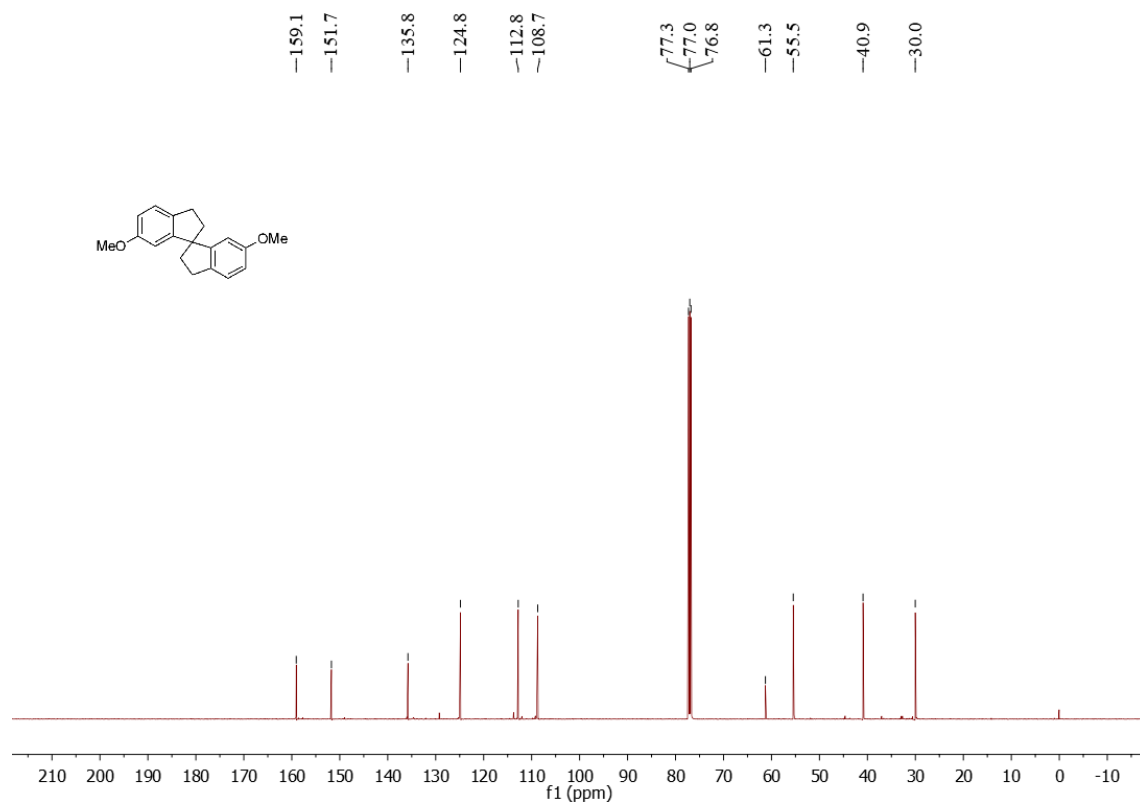

Figure S7. <sup>1</sup>H NMR spectrum of **2d**, related to Figure 2

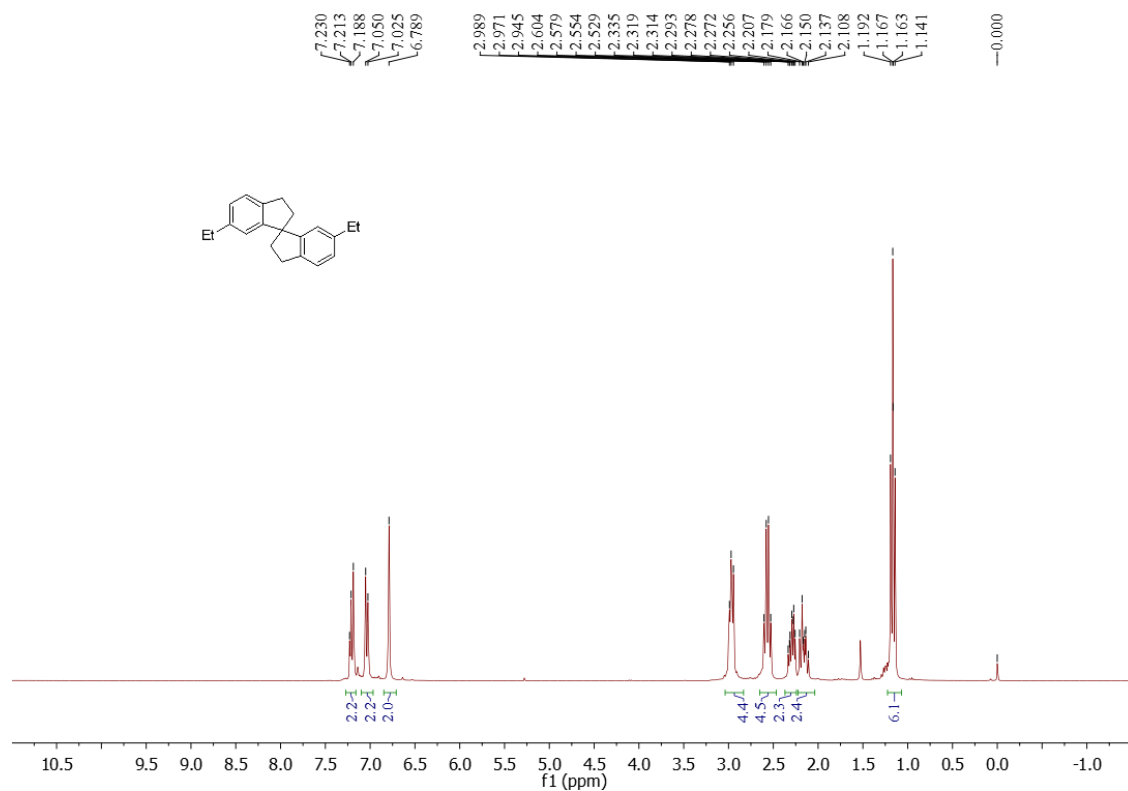

Figure S8. <sup>13</sup>C NMR spectrum of **2d**, related to Figure 2

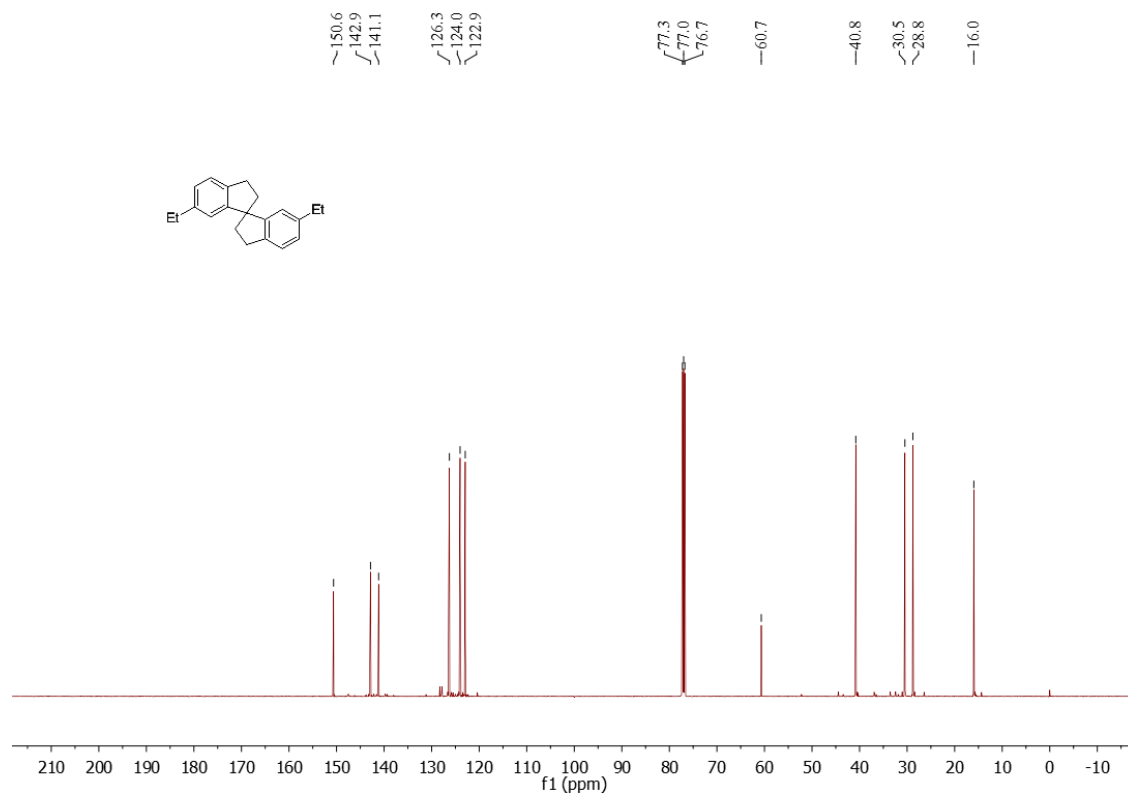

Figure S9. <sup>1</sup>H NMR spectrum of **2e**, related to Figure 2

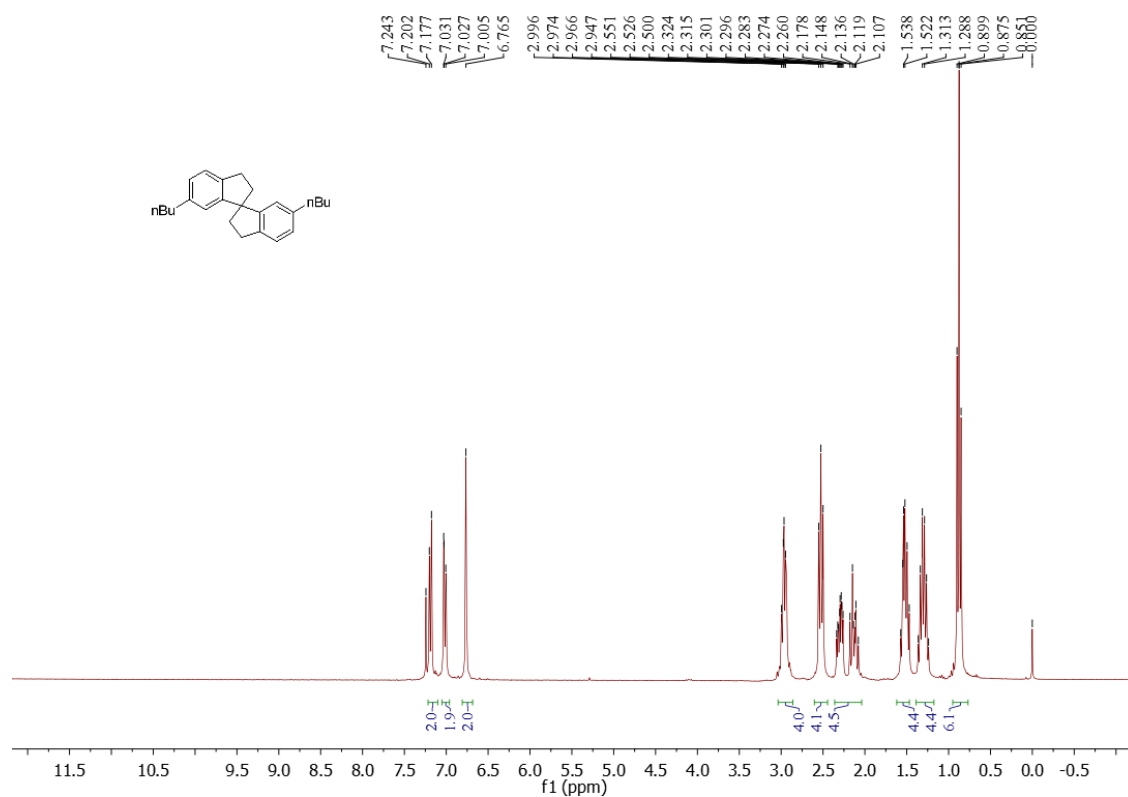

Figure S10. <sup>13</sup>C NMR spectrum of **2e**, related to Figure 2

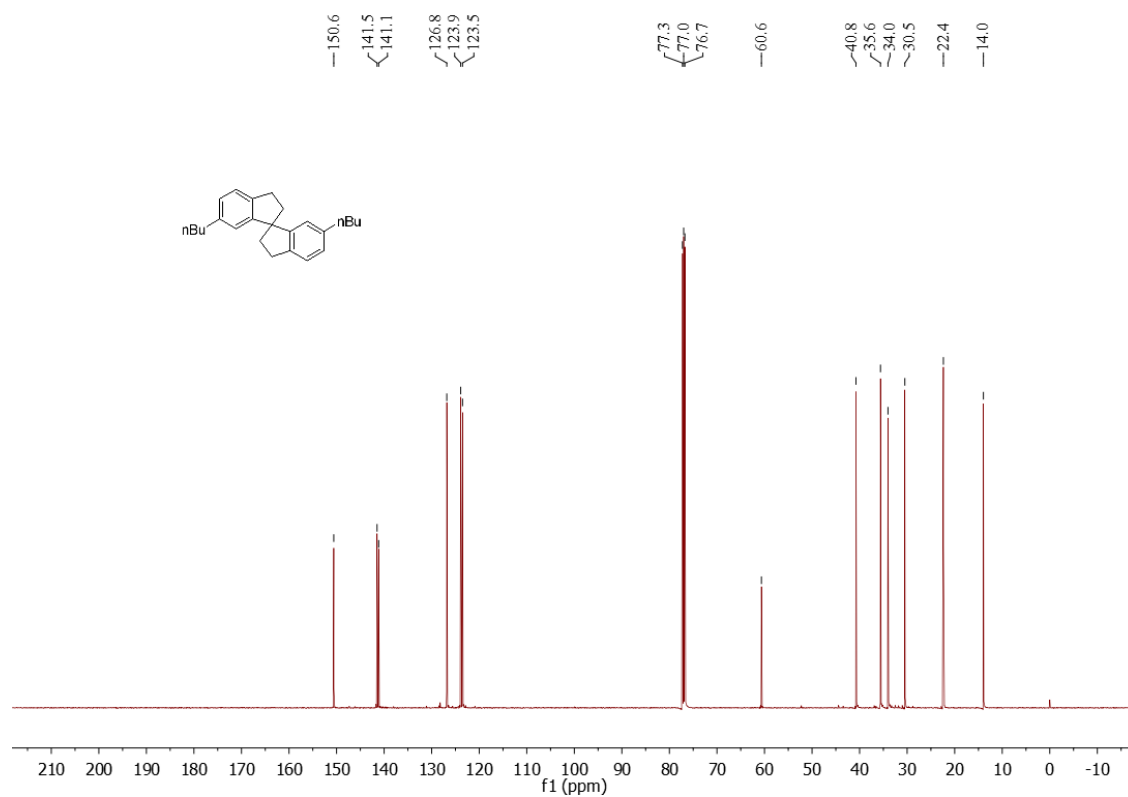

Figure S11. <sup>1</sup>H NMR spectrum of **2f**, related to Figure 2

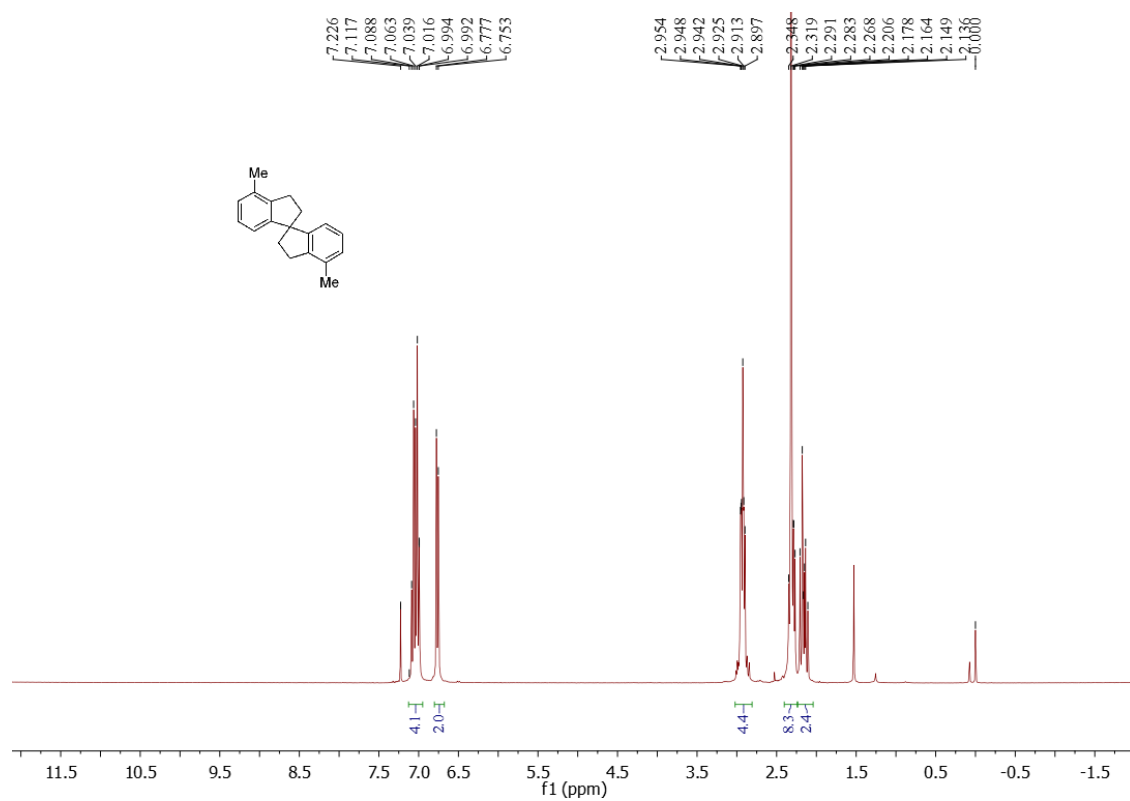

Figure S12. <sup>13</sup>C NMR spectrum of **2f**, related to Figure 2

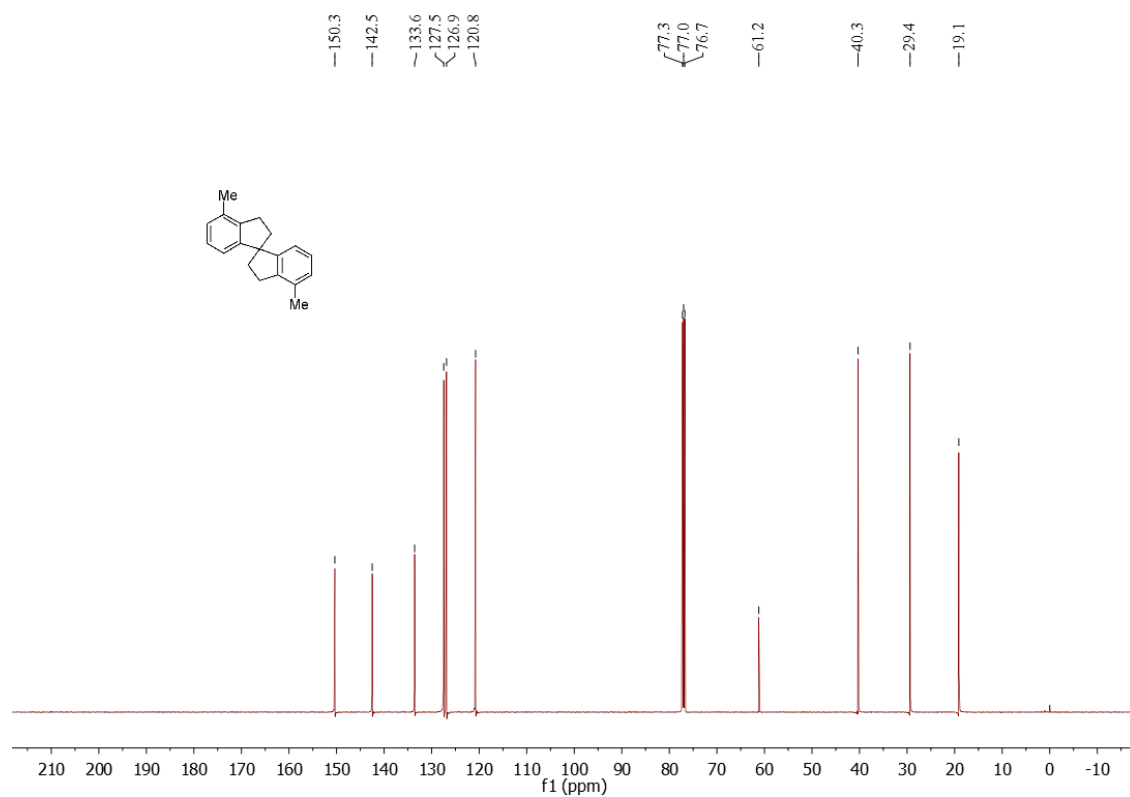

Figure S13. <sup>1</sup>H NMR spectrum of **2g**, related to Figure 2

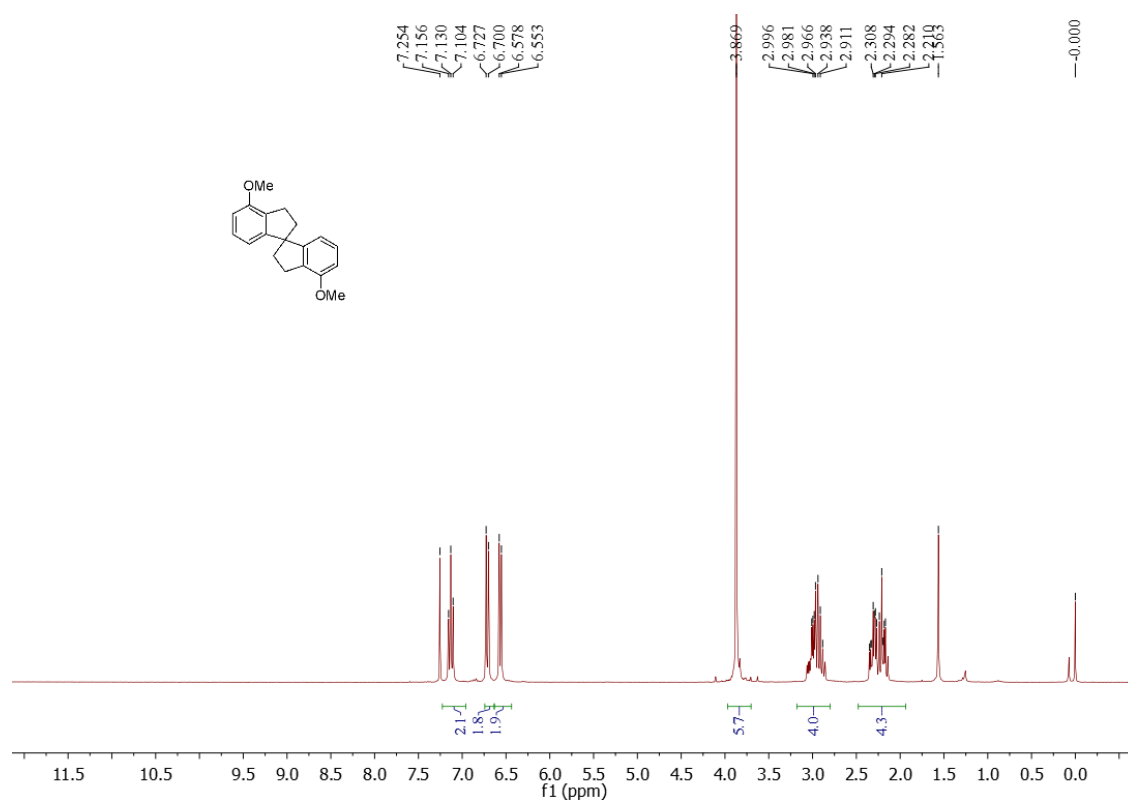

Figure S14. <sup>13</sup>C NMR spectrum of **2g**, related to Figure 2

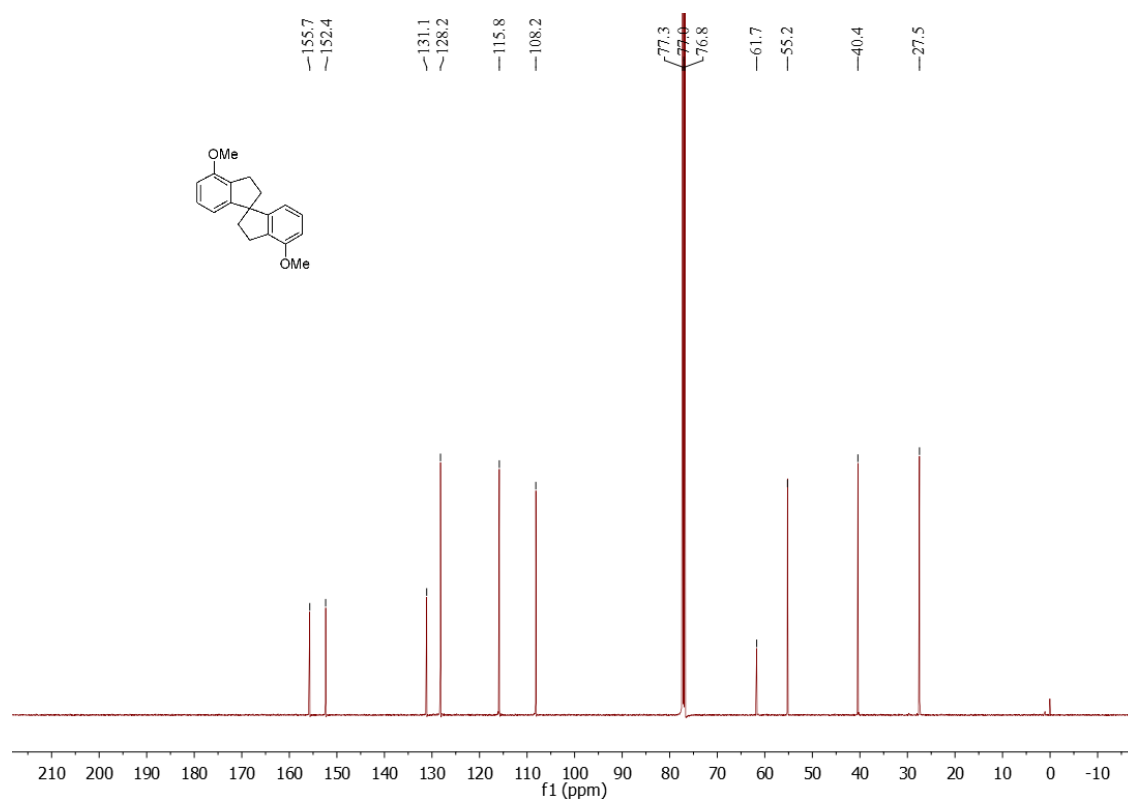



Figure S15. <sup>1</sup>H NMR spectrum of **2h**, related to Figure 2

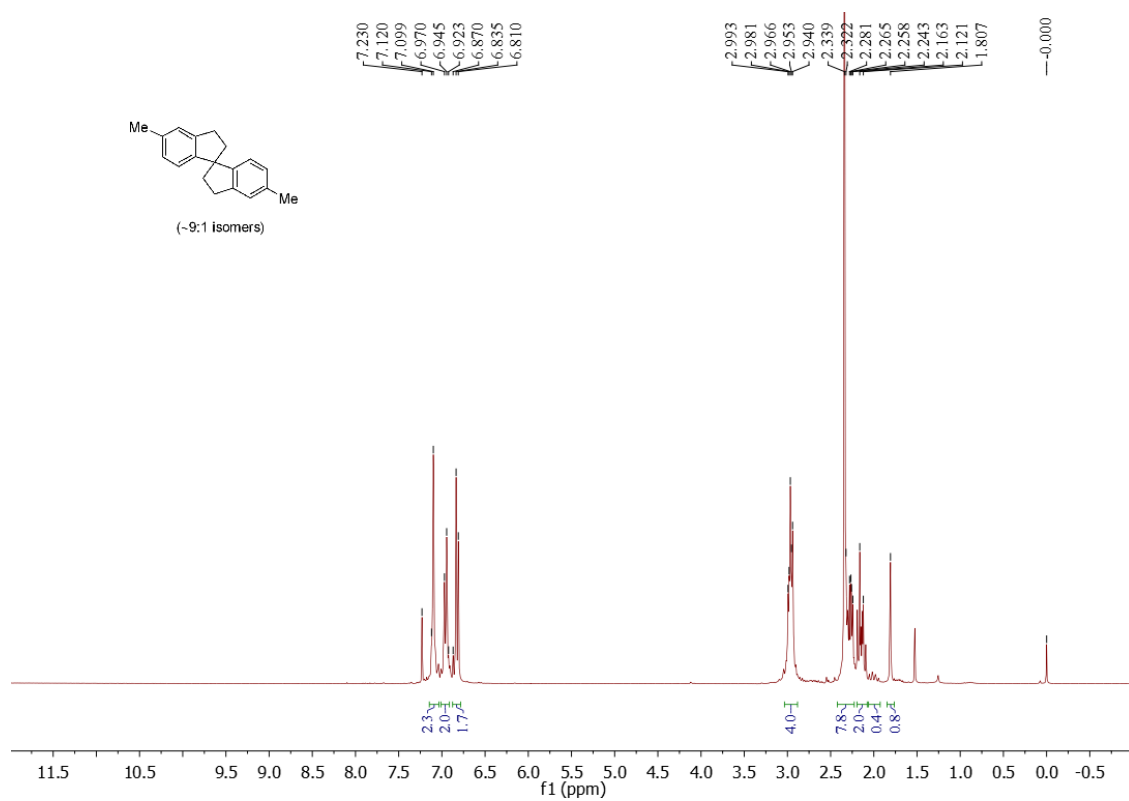

Figure S16. <sup>13</sup>C NMR spectrum of **2h**, related to Figure 2

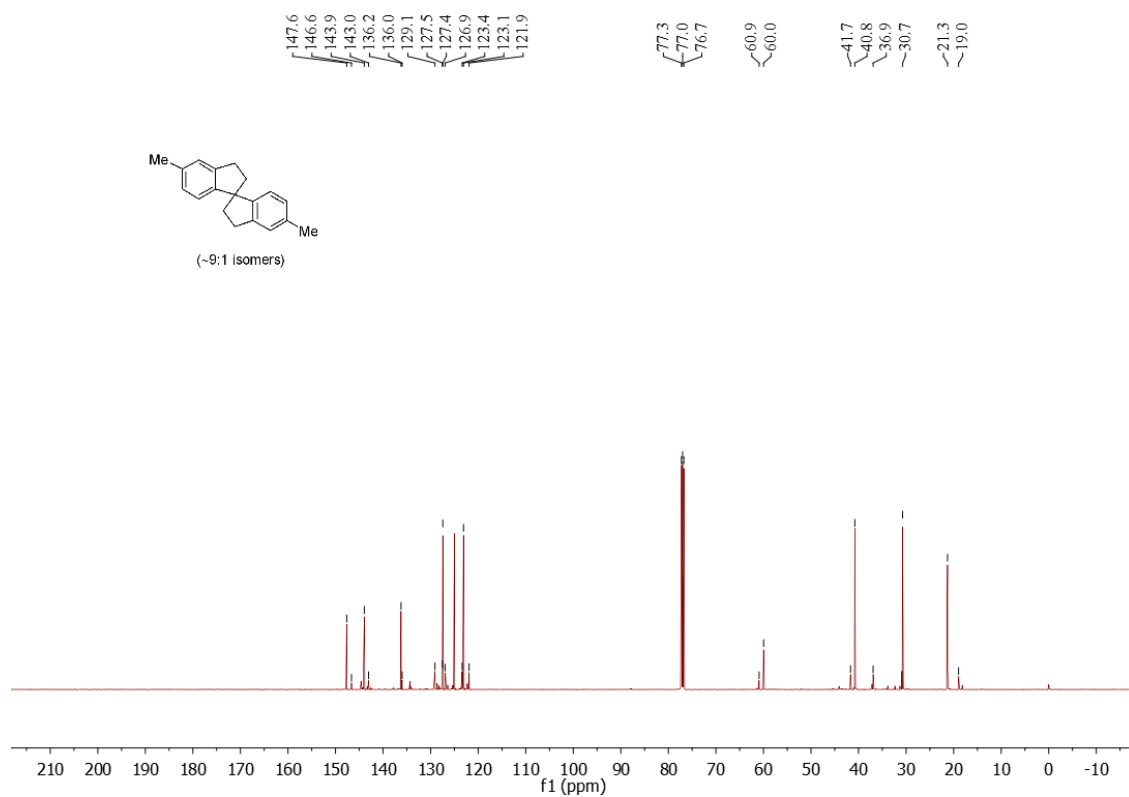

Figure S17. GC-MS analysis of 2h, related to Figure 2

2018/04/13, 14:21:54

C:\GCMSSolution\Data\WANGJIANDONG\Wjd-921.qgd

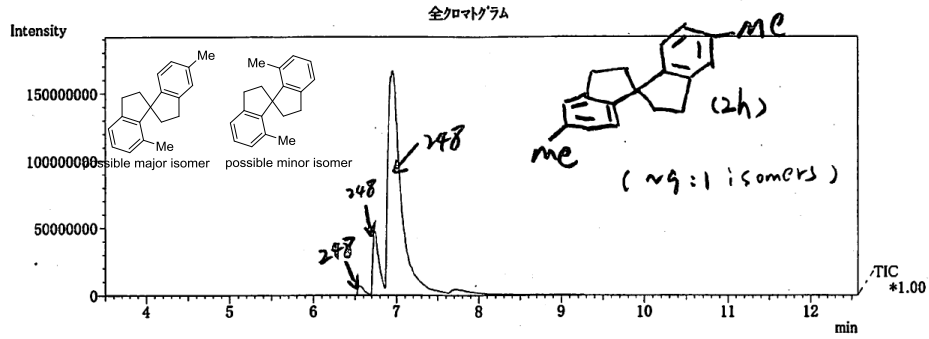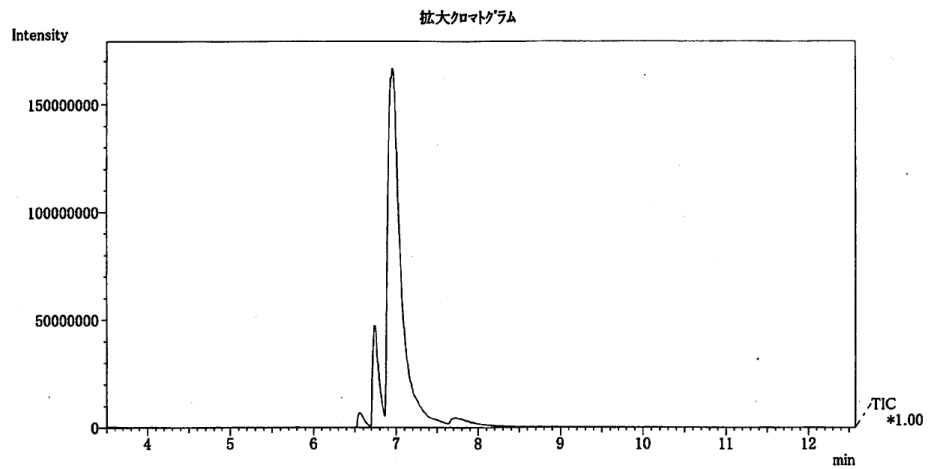

スペクトル

#1 保持時間:6.967(スキャン#:417)  
ピーク数:187 ベースピーク:233.25(16495864)  
スペクトル:シングル 6.967(417)  
バックグラウンド:なし

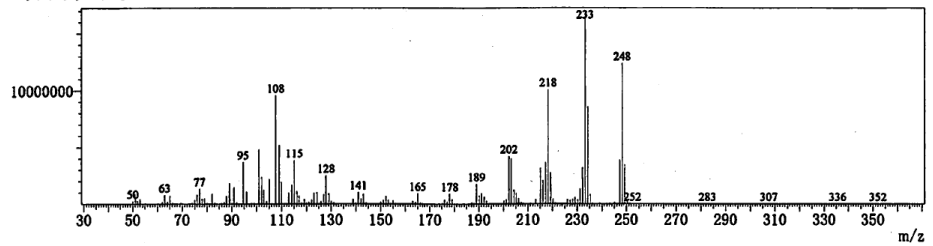

Figure S18. <sup>1</sup>H NMR spectrum of **2i**, related to Figure 2

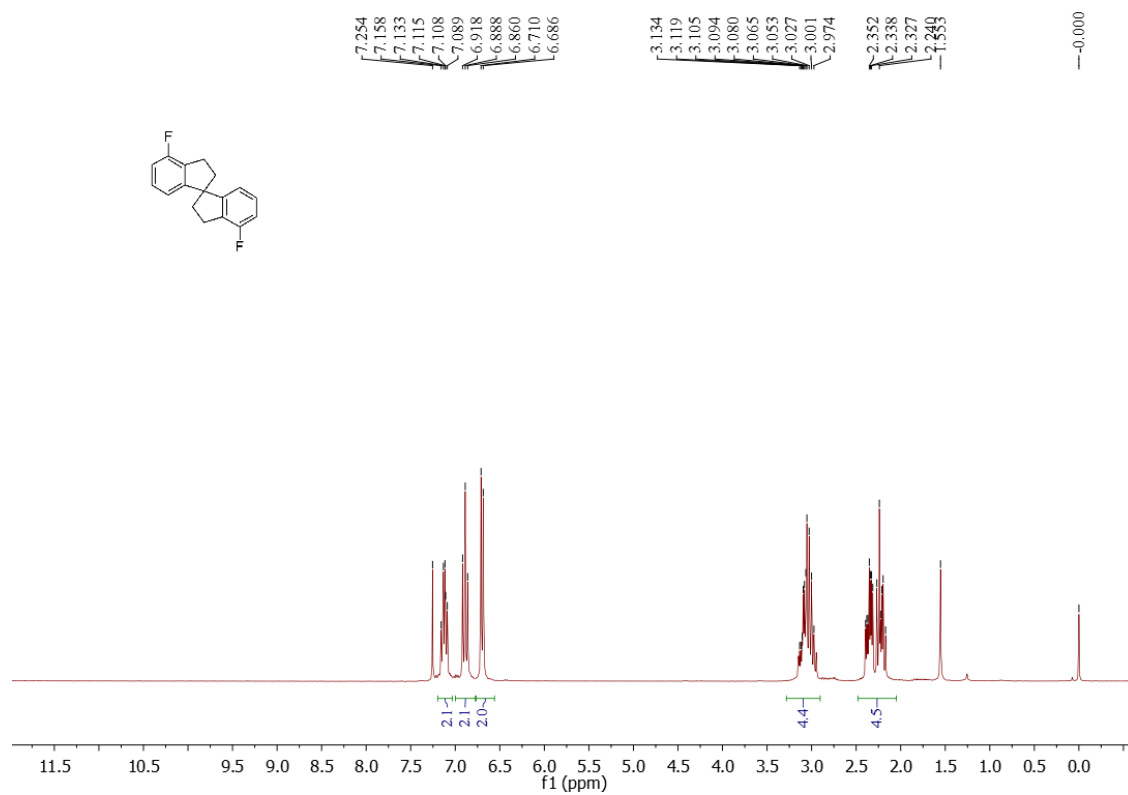

Figure S19. <sup>13</sup>C NMR spectrum of **2i**, related to Figure 2

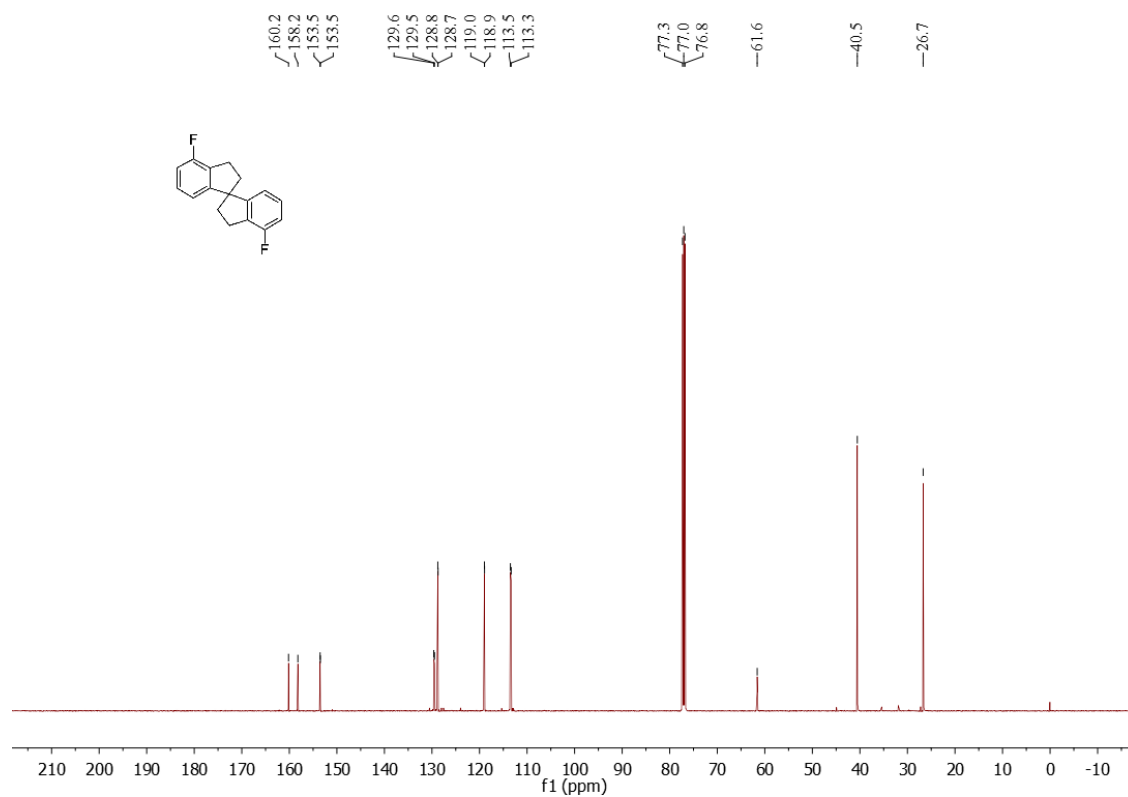

Figure S20. <sup>1</sup>H NMR spectrum of **2j**, related to Figure 2

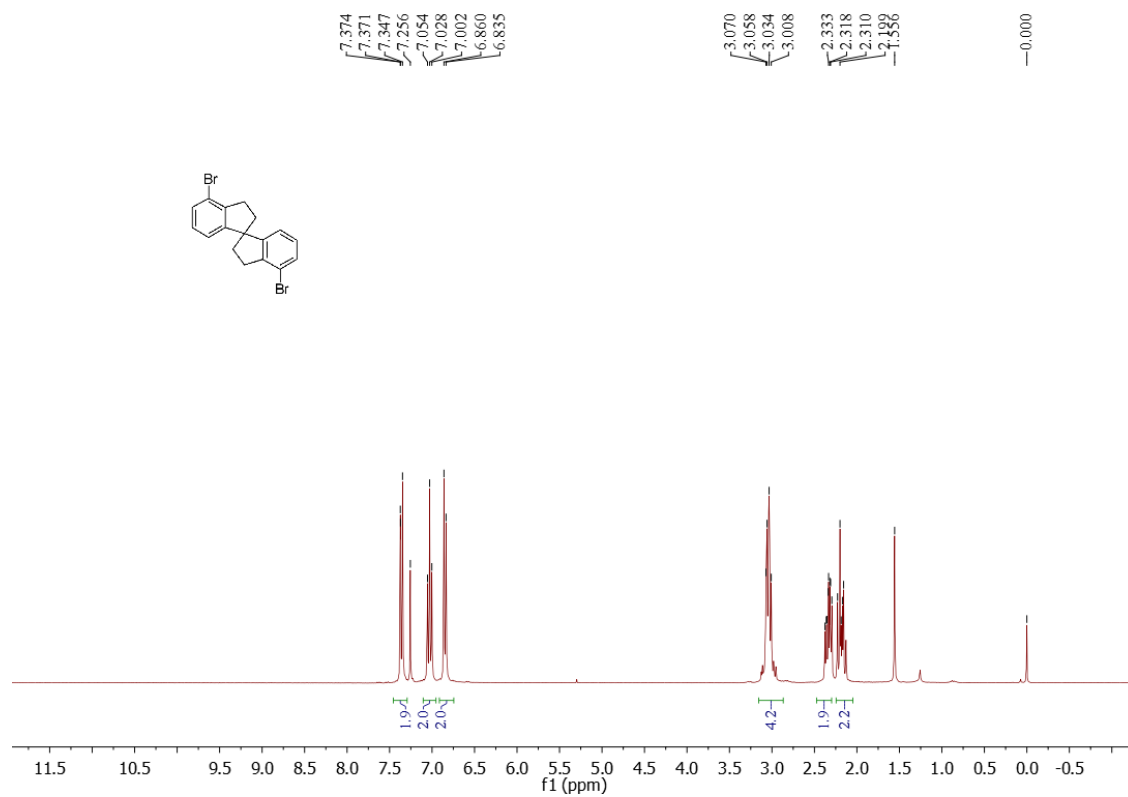

Figure S21. <sup>13</sup>C NMR spectrum of **2j**, related to Figure 2

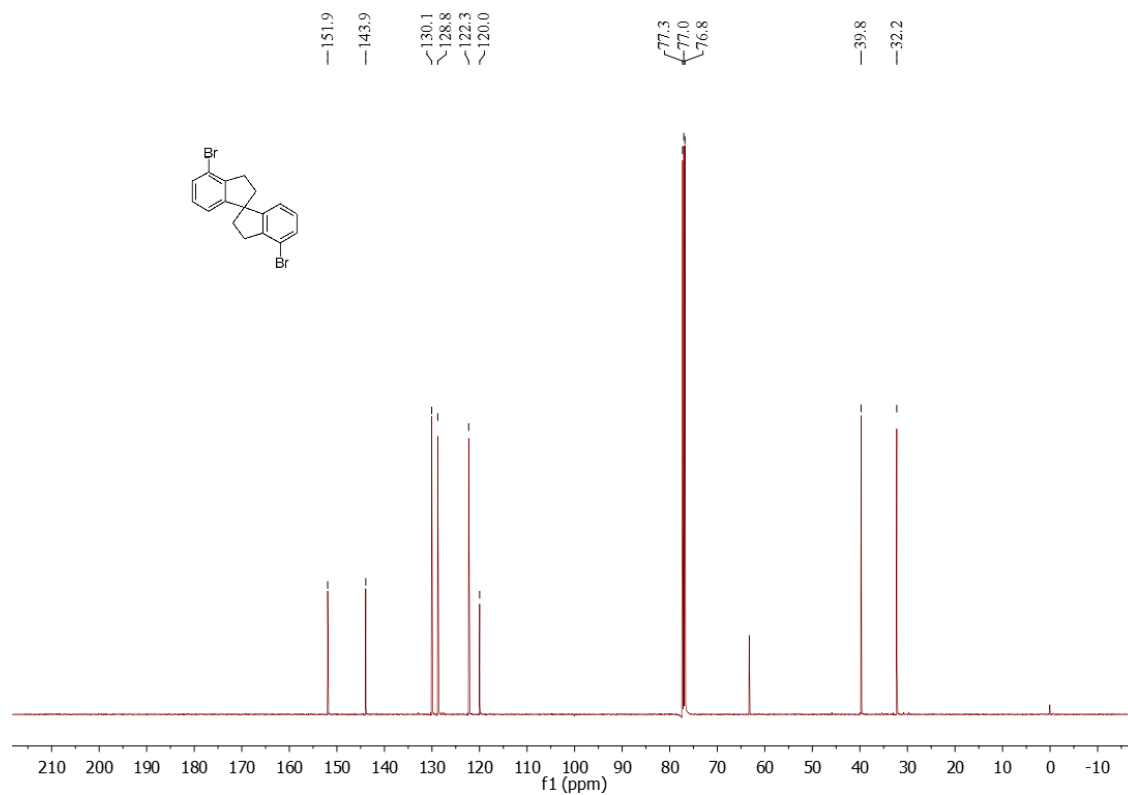

Figure S22. <sup>1</sup>H NMR spectrum of **2k**, related to Figure 2

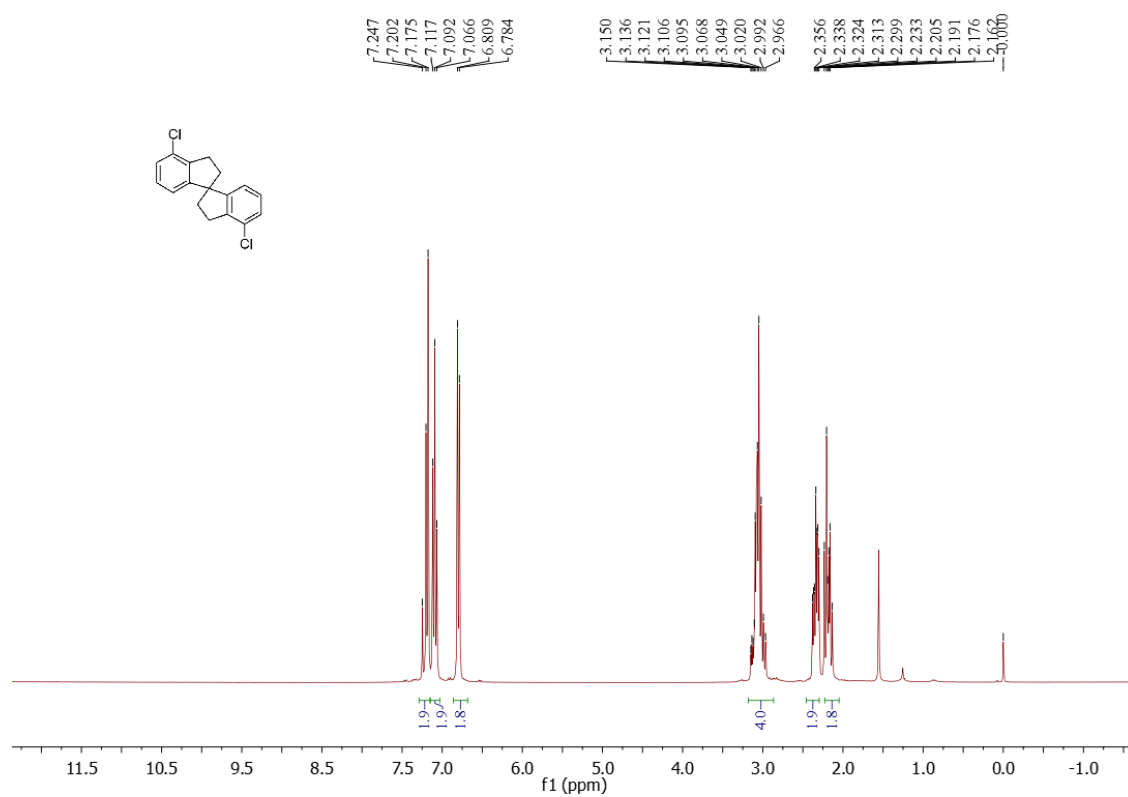

Figure S23. <sup>13</sup>C NMR spectrum of **2k**, related to Figure 2

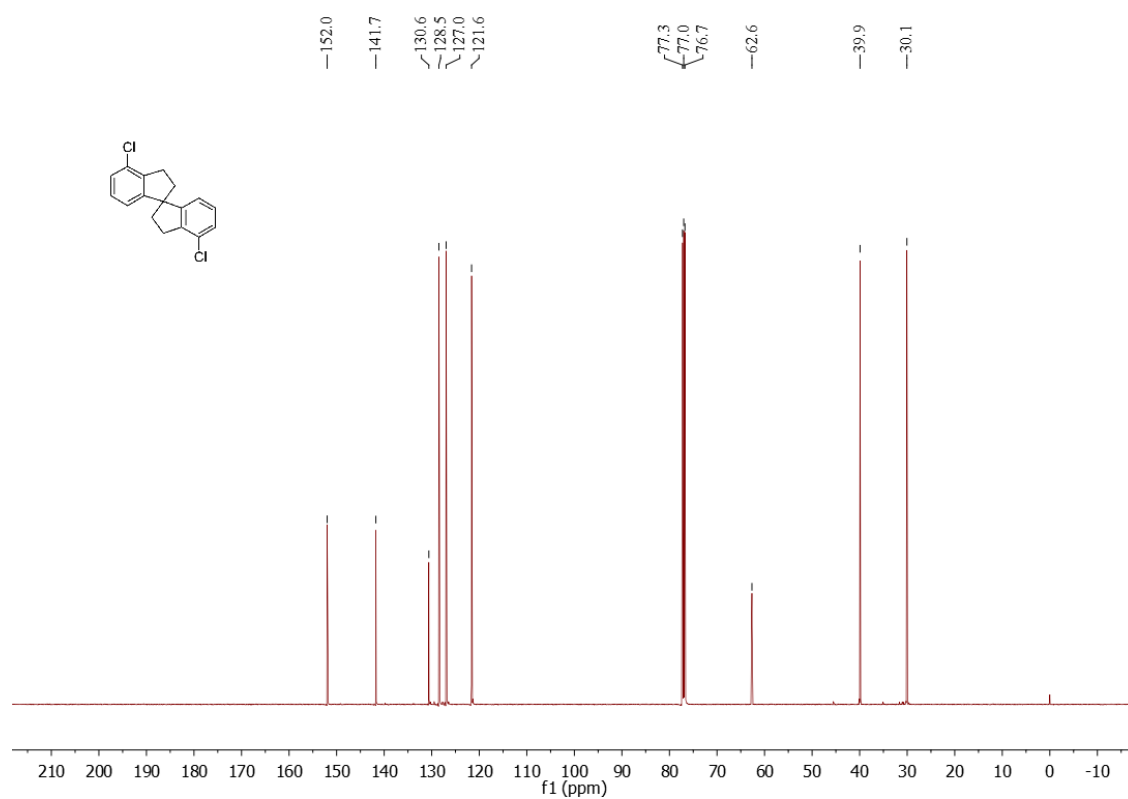

Figure S24. <sup>1</sup>H NMR spectrum of **2I**, related to Figure 2

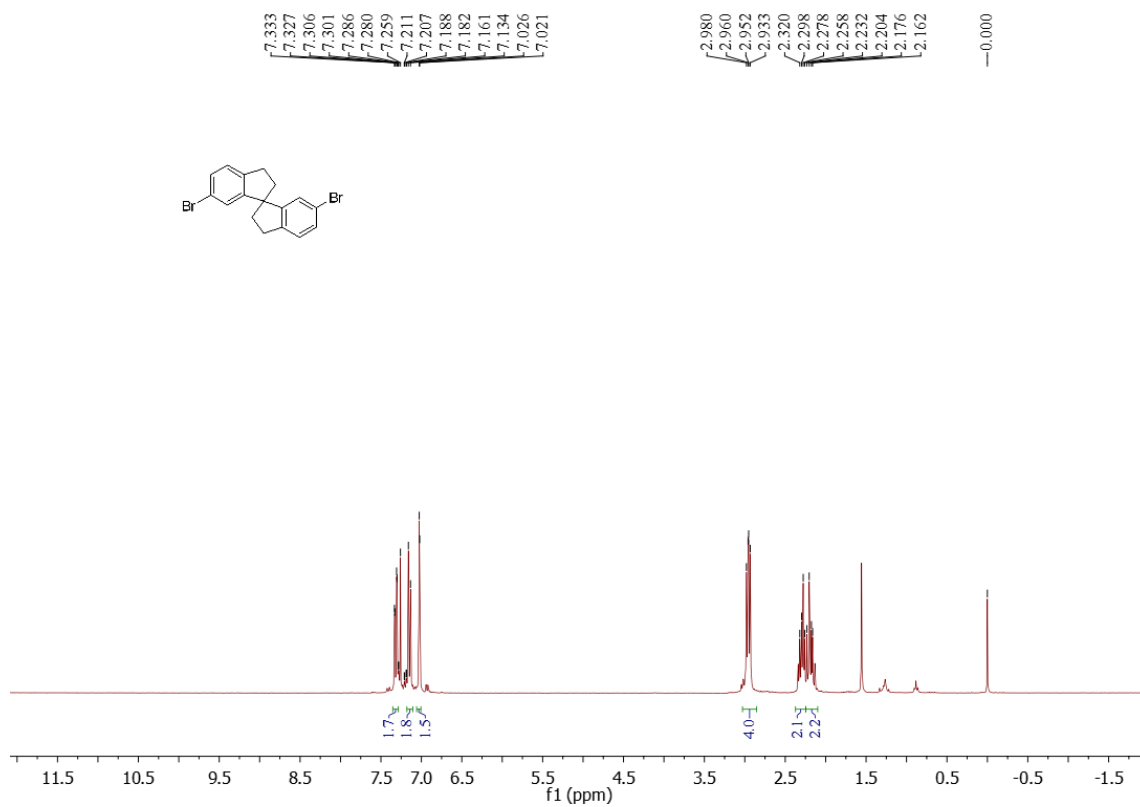

Figure S25. <sup>13</sup>C NMR spectrum of **2I**, related to Figure 2

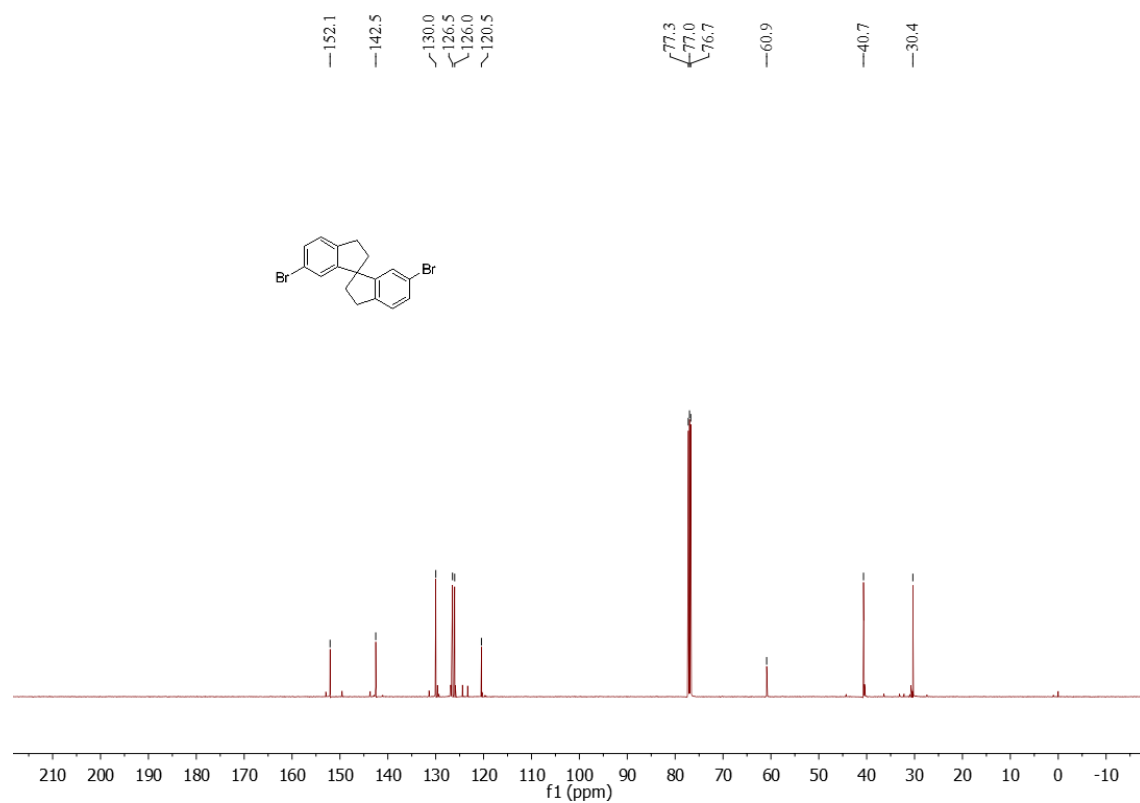

Figure S26. <sup>1</sup>H NMR spectrum of **2m**, related to Figure 2

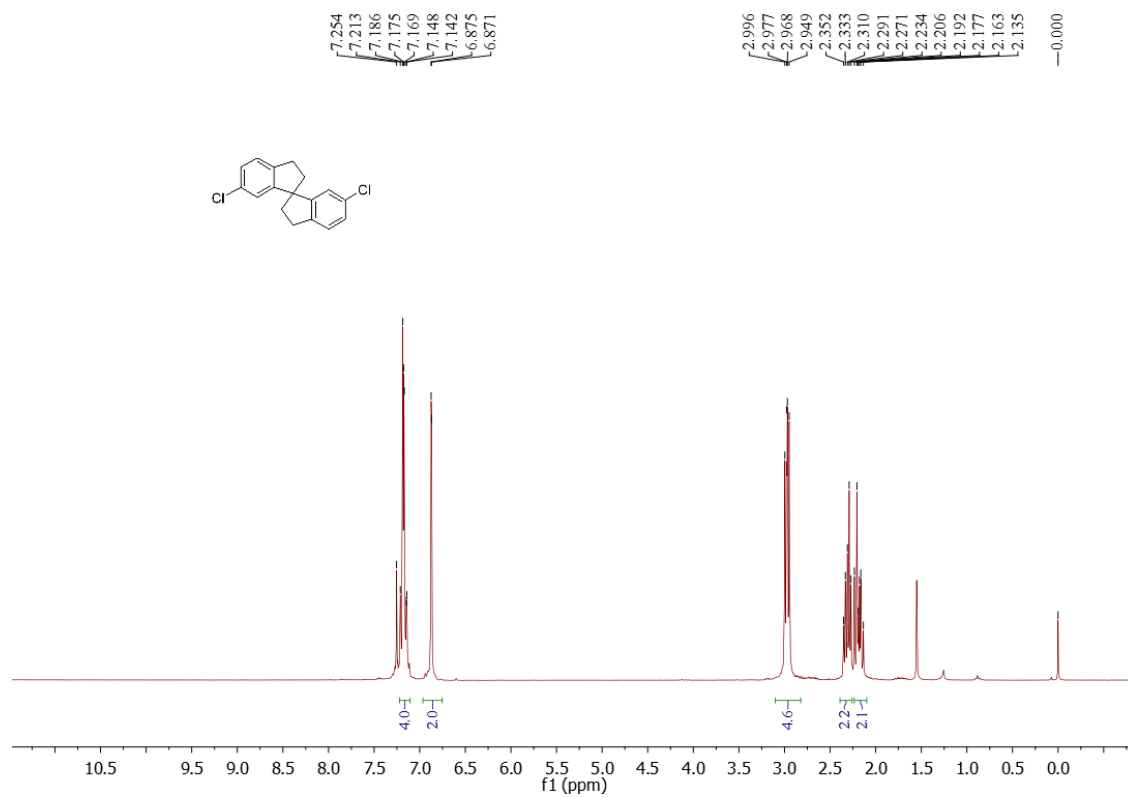

Figure S27. <sup>13</sup>C NMR spectrum of **2m**, related to Figure 2

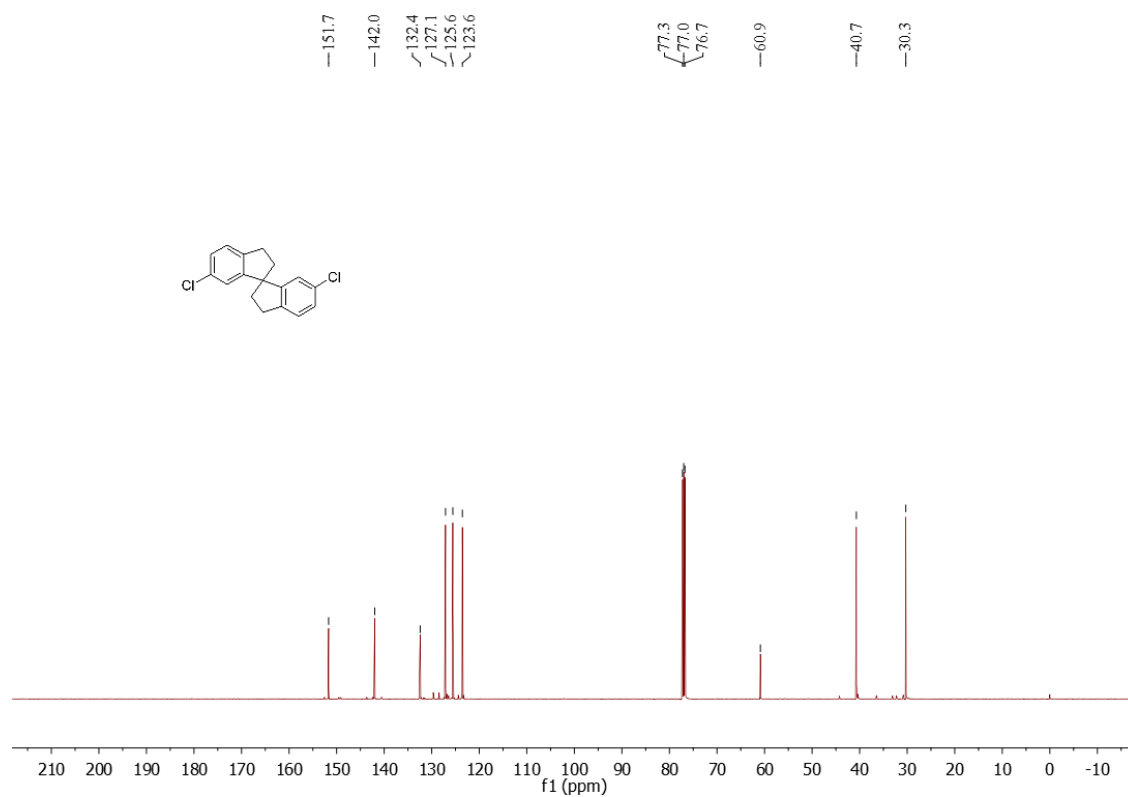

Figure S28. <sup>1</sup>H NMR spectrum of **2n**, related to Figure 2

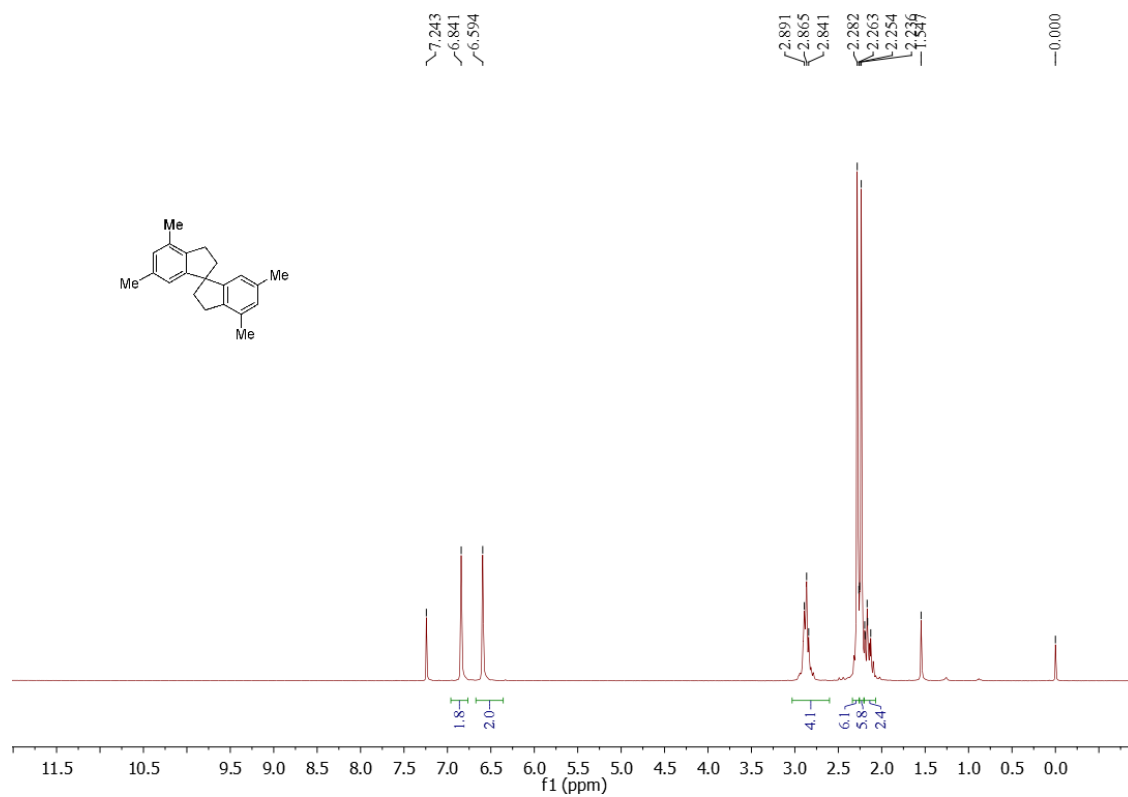

Figure S29. <sup>13</sup>C NMR spectrum of **2n**, related to Figure 2

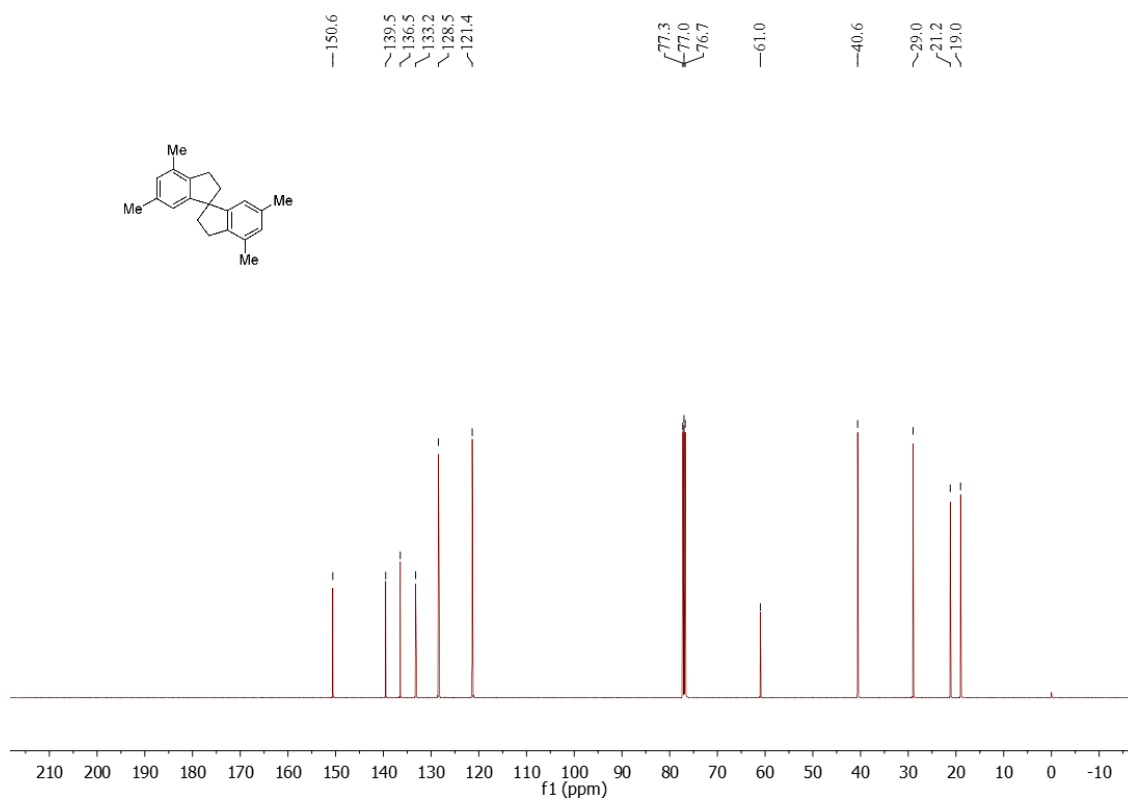



Figure S30. <sup>1</sup>H NMR spectrum of **2o**, related to Figure 2

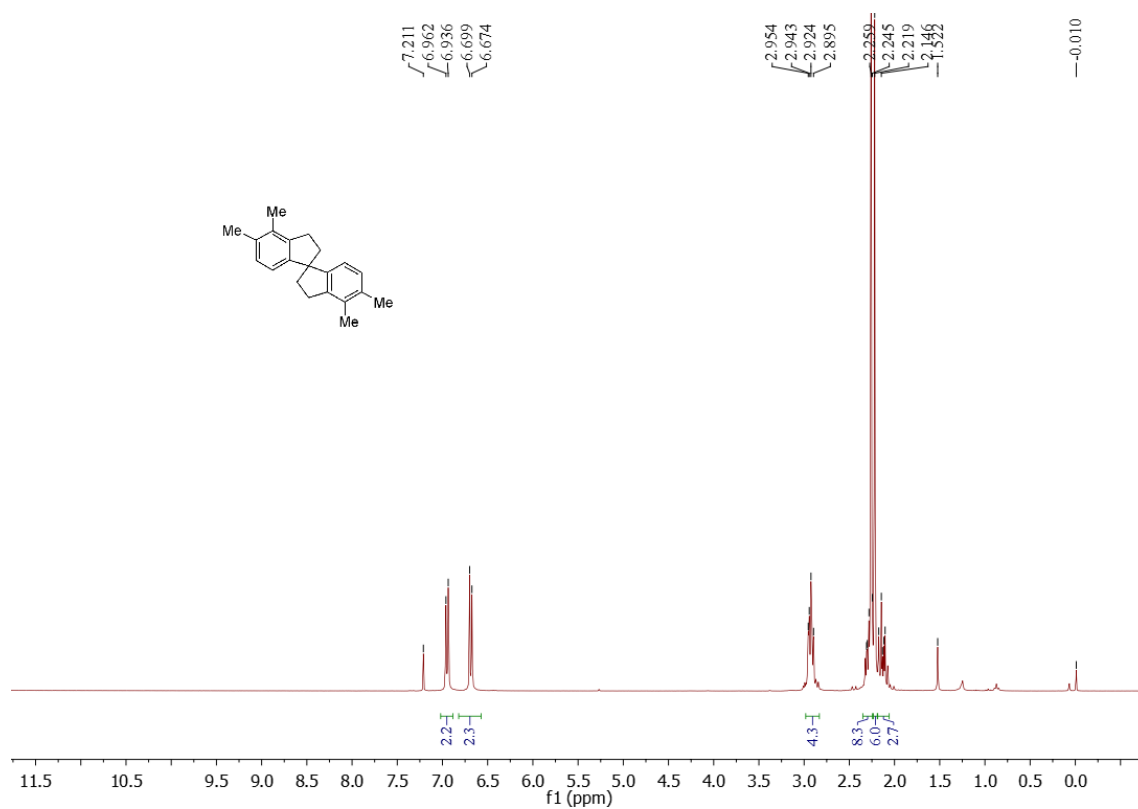

Figure S31. <sup>13</sup>C NMR spectrum of **2o**, related to Figure 2

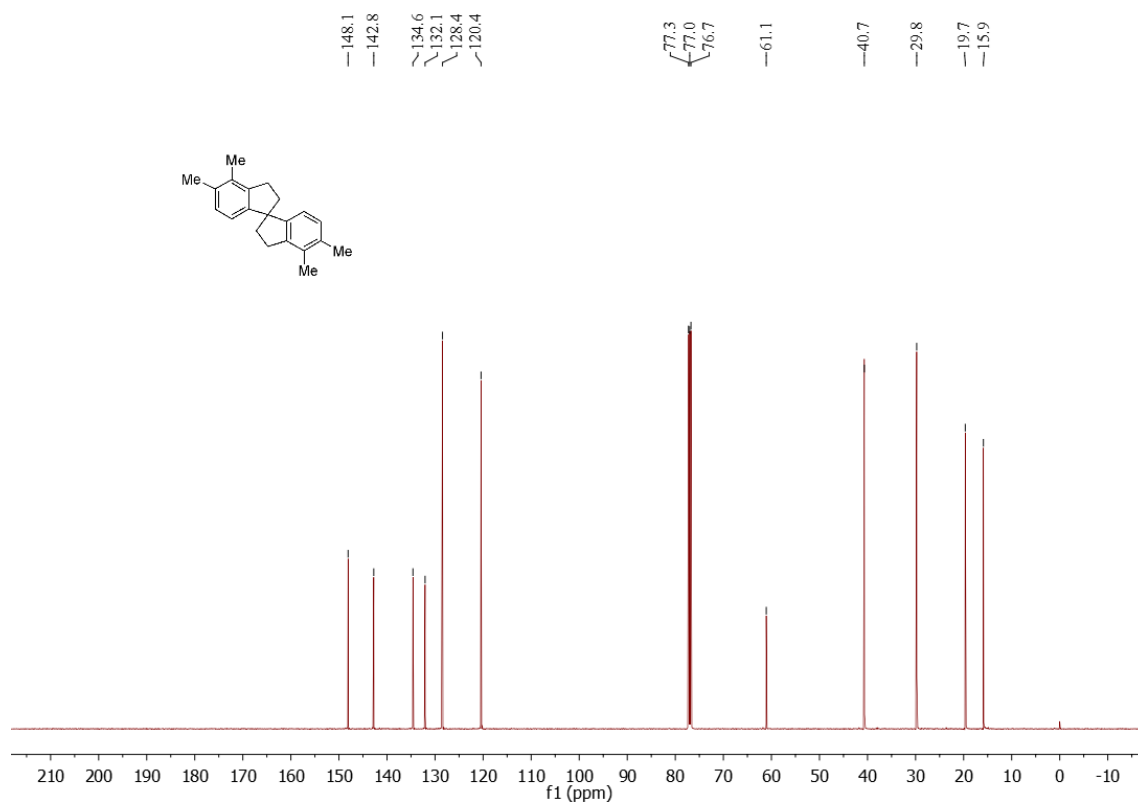

Figure S32. <sup>1</sup>H NMR spectrum of **2p**, related to Figure 2

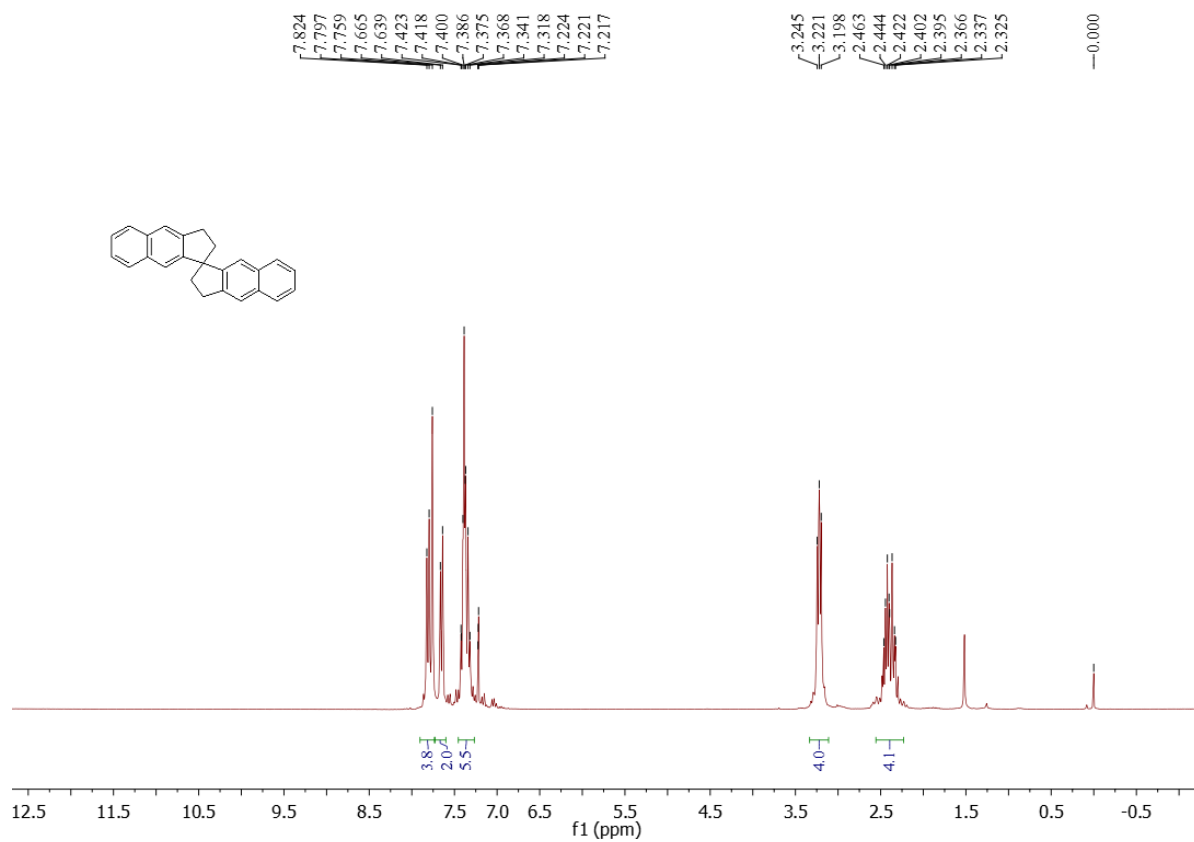

Figure S33. <sup>13</sup>C NMR spectrum of **2p**, related to Figure 2

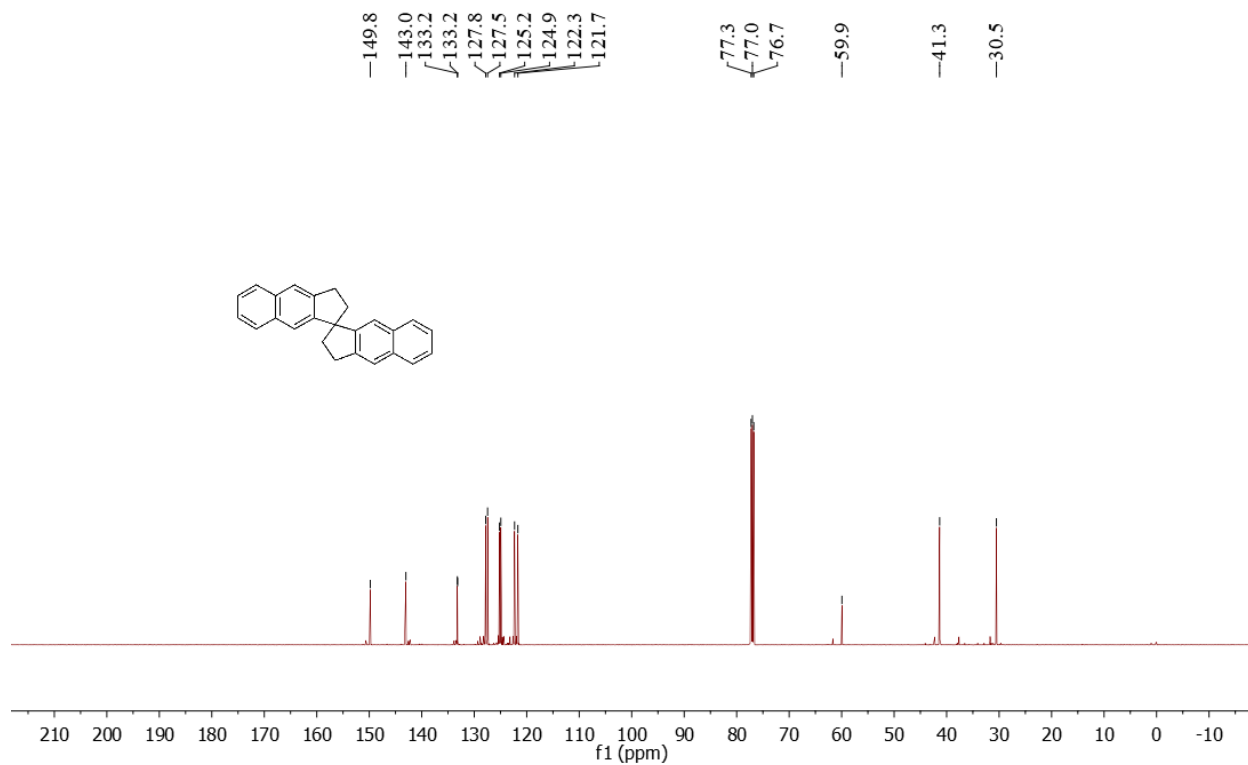

Figure S34. <sup>1</sup>H NMR spectrum of **2q**, related to Figure 2

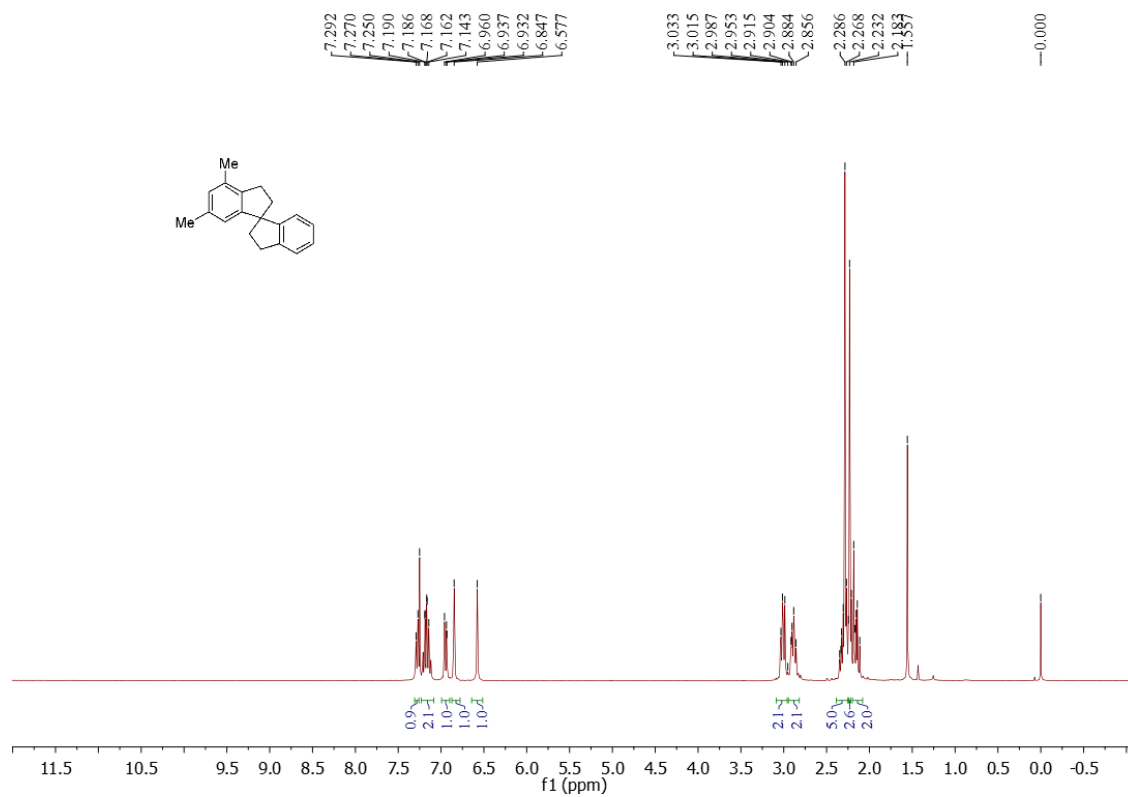

Figure S35. <sup>13</sup>C NMR spectrum of **2q**, related to Figure 2

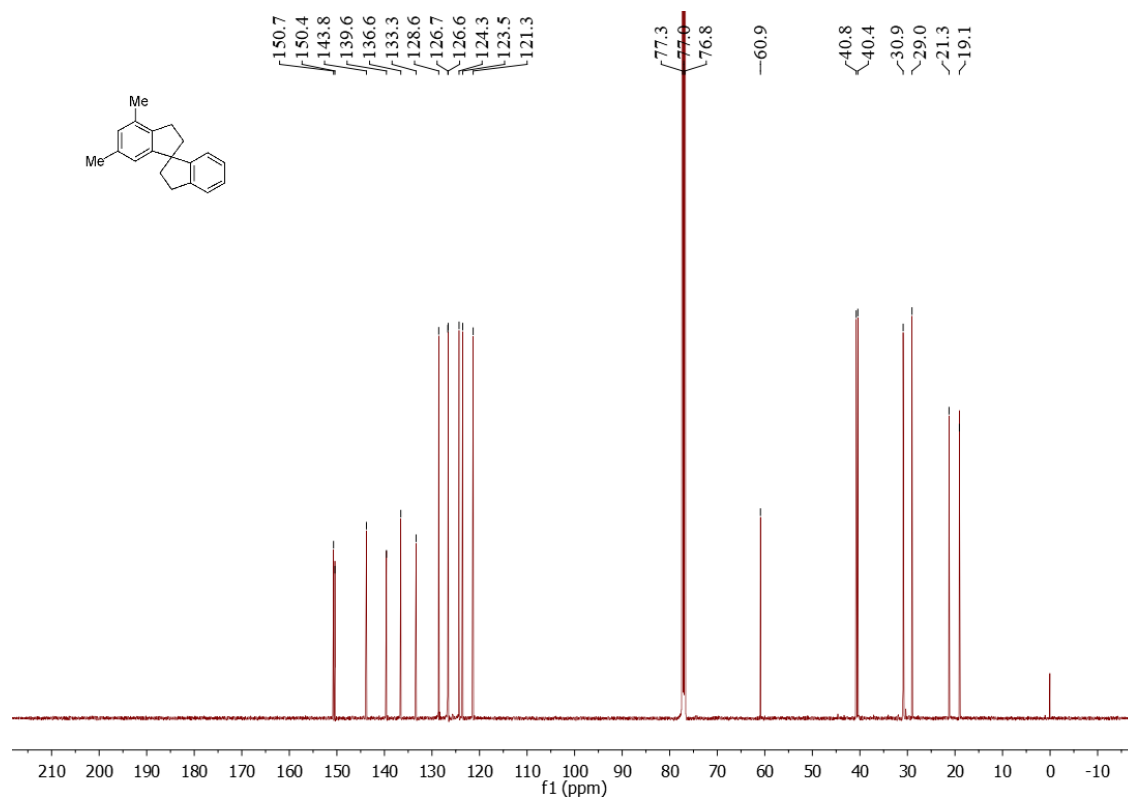

Figure S36. <sup>1</sup>H NMR spectrum of 2r, related to Figure 2

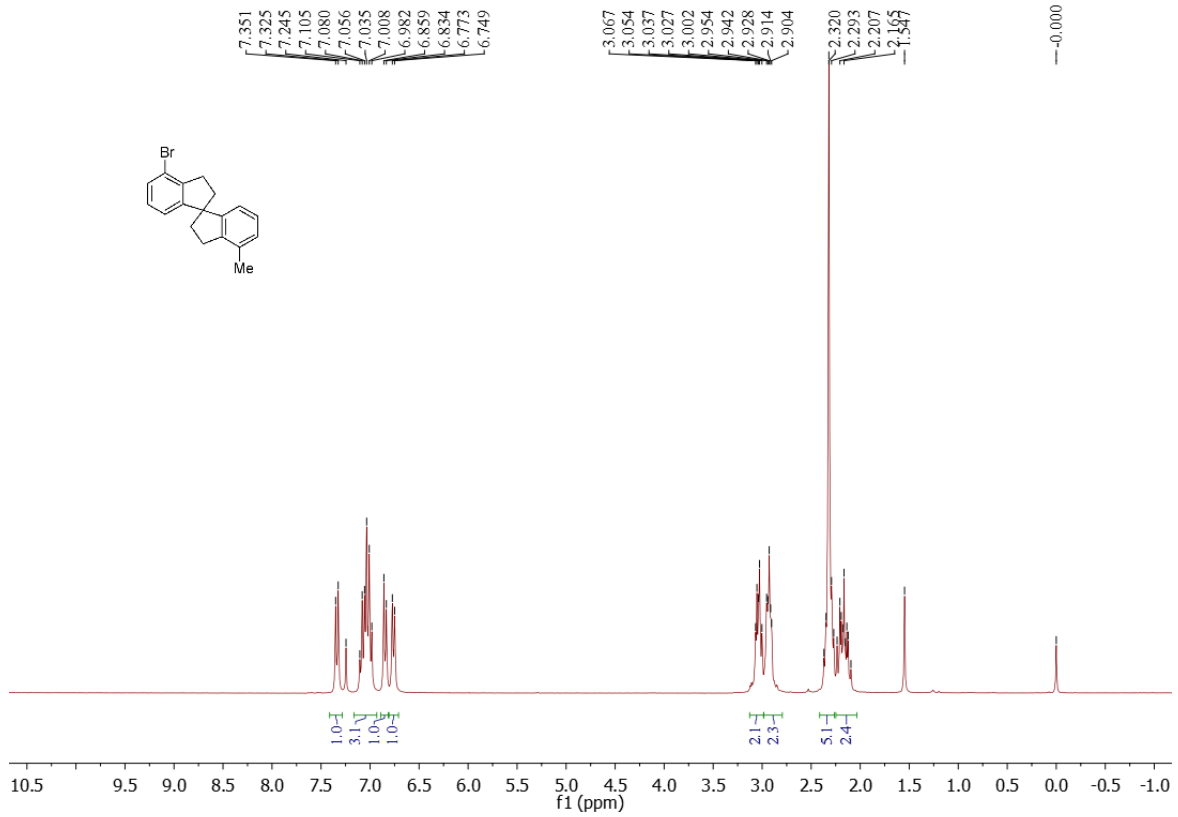

Figure S37. <sup>13</sup>C NMR spectrum of 2r, related to Figure 2

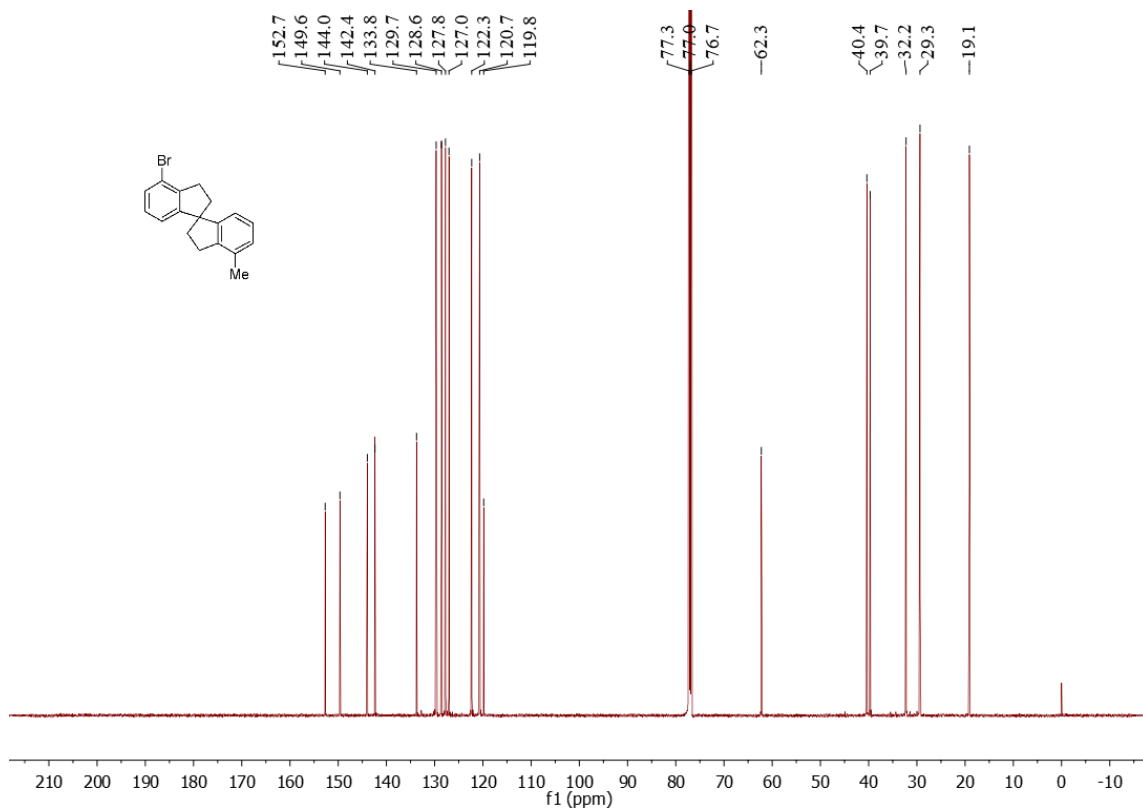

Figure S38. <sup>1</sup>H NMR spectrum of **2s**, related to Figure 2

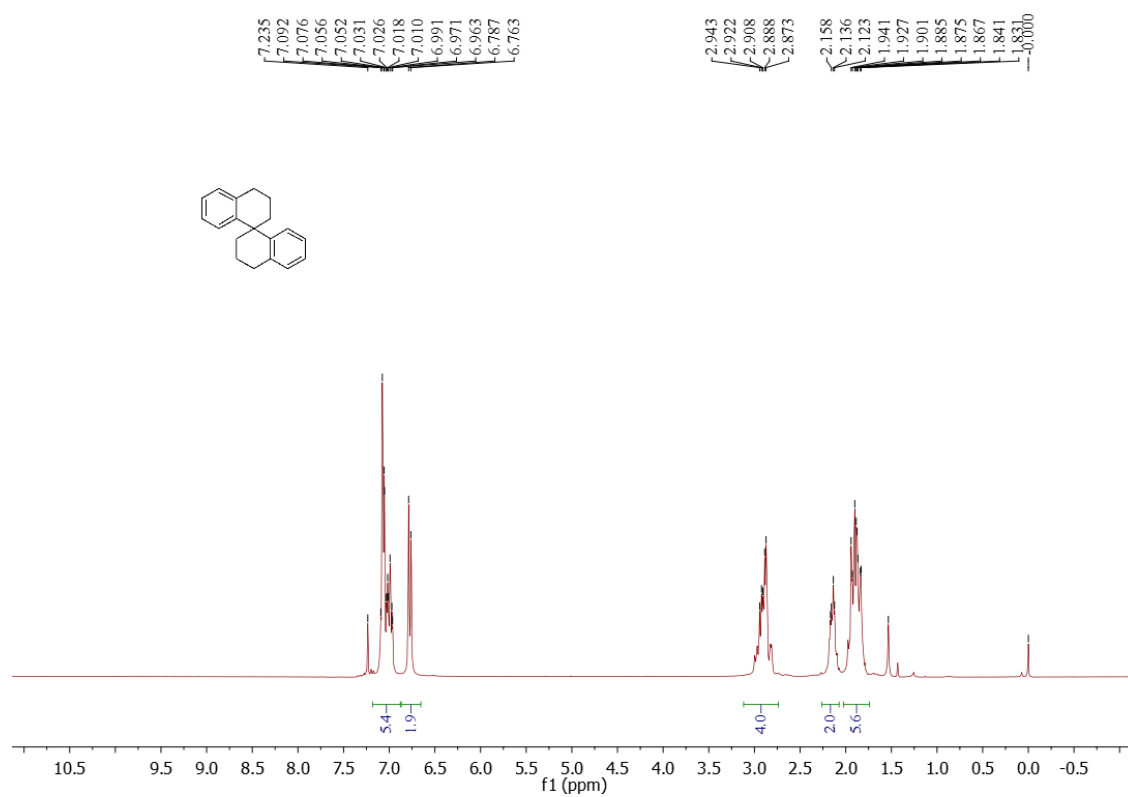

Figure S39. <sup>13</sup>C NMR spectrum of **2s**, related to Figure 2

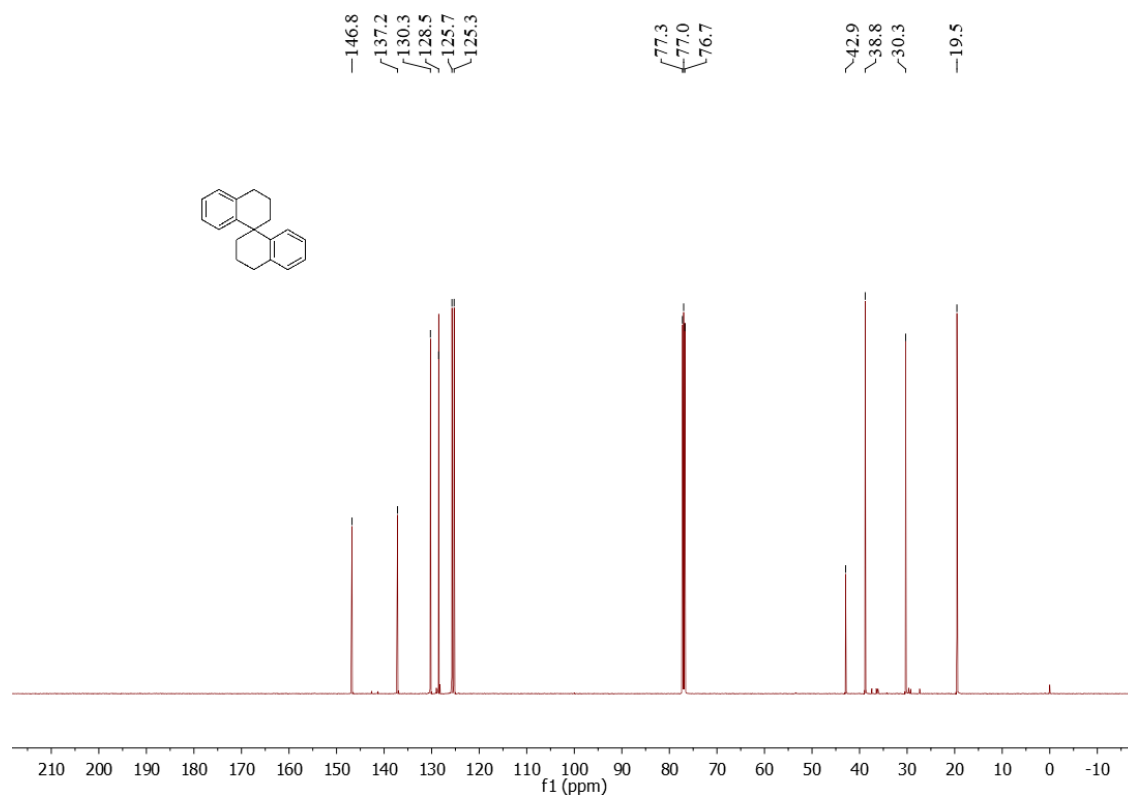

Figure S40. <sup>1</sup>H NMR spectrum of **2t**, related to Figure 2

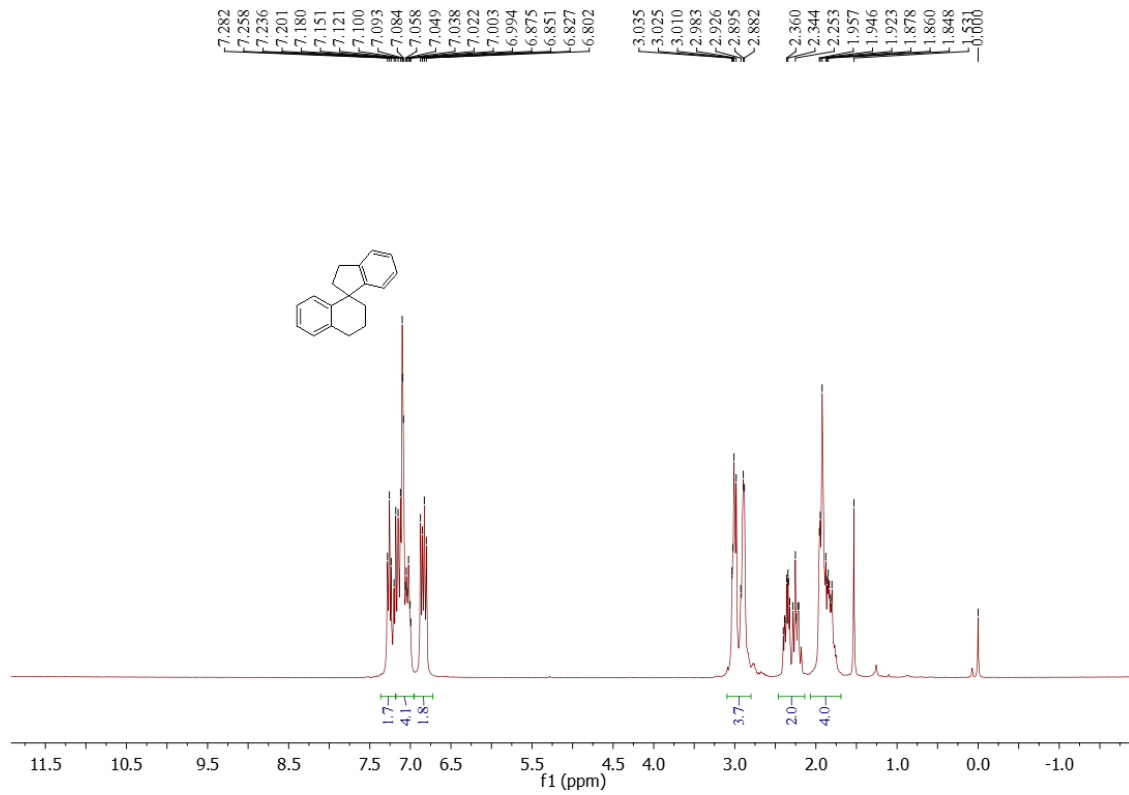

Figure S41. <sup>13</sup>C NMR spectrum of **2t**, related to Figure 2

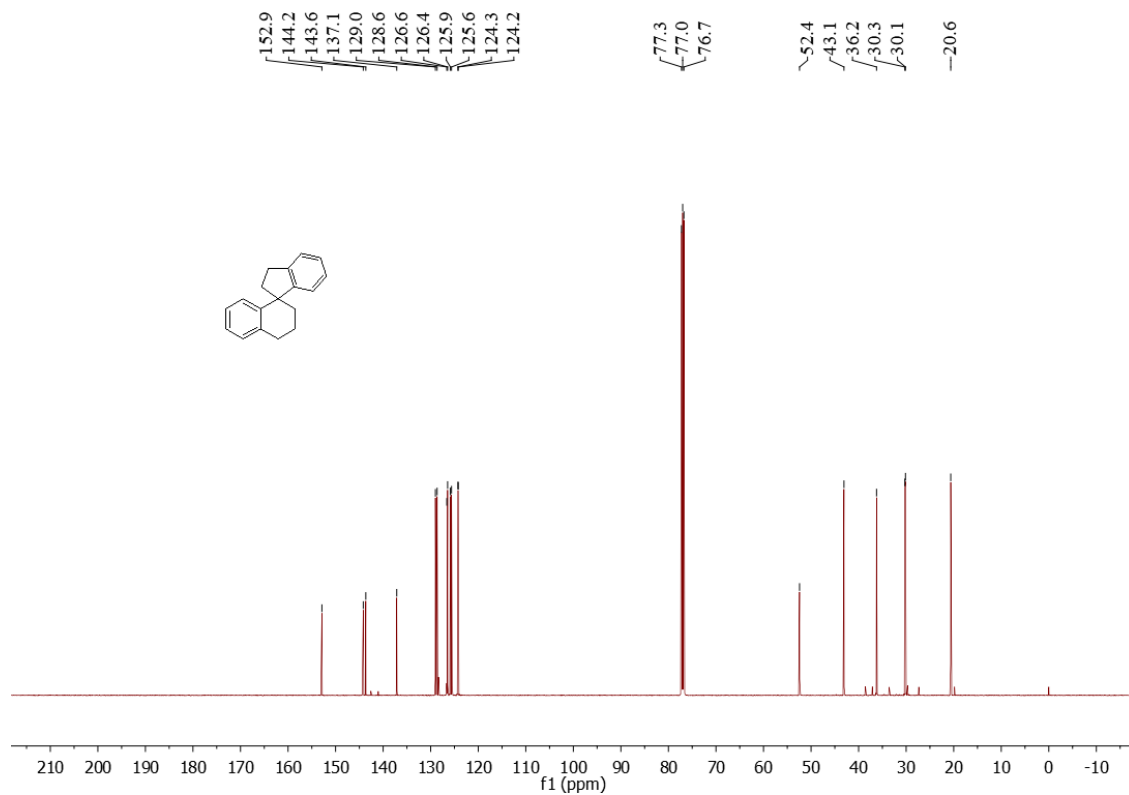

Figure S42. <sup>1</sup>H NMR spectrum of **3a**, related to Figure 2

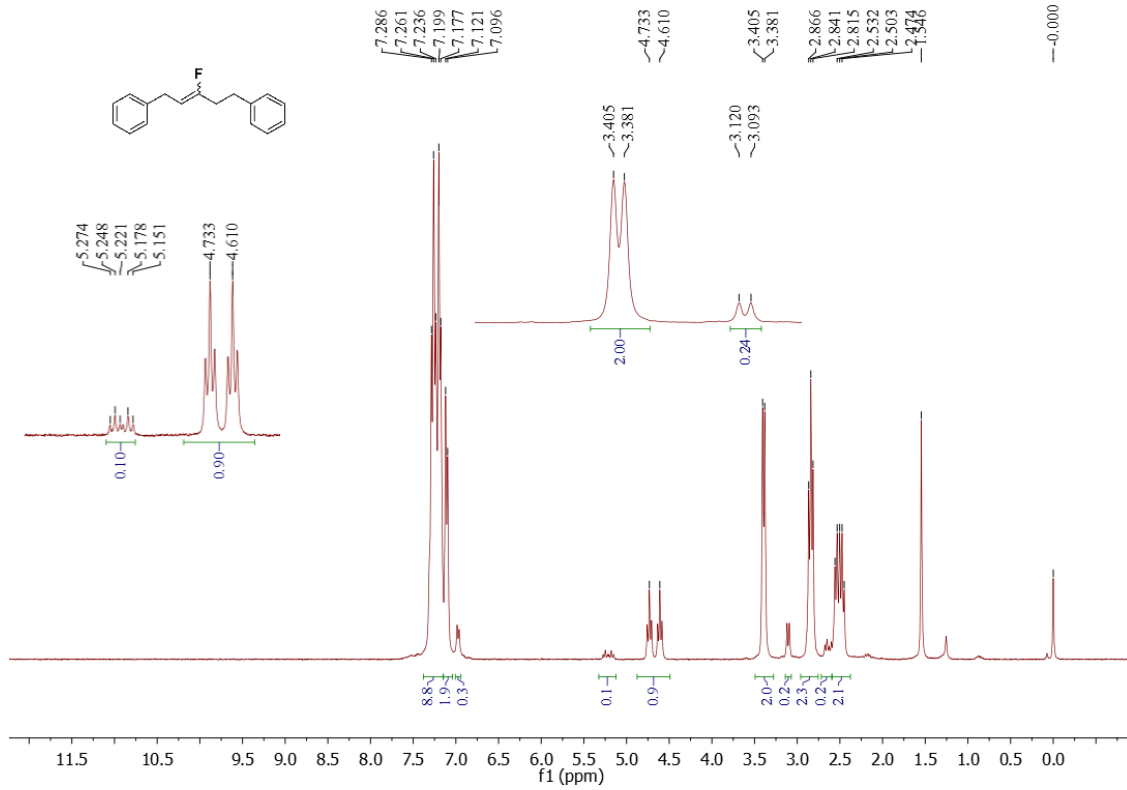

Figure S43. <sup>13</sup>C NMR spectrum of **3a**, related to Figure 2

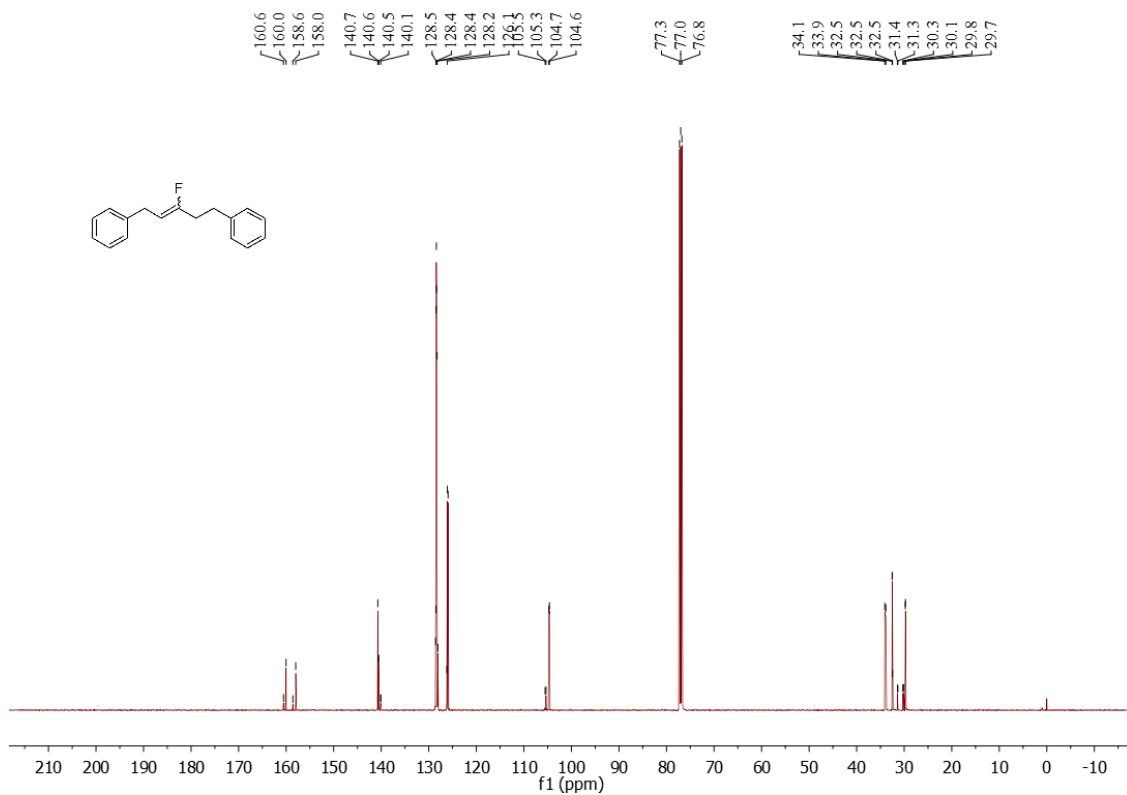

Figure S44.  $^{19}\text{F}$  NMR spectrum of **3a**, related to Figure 2

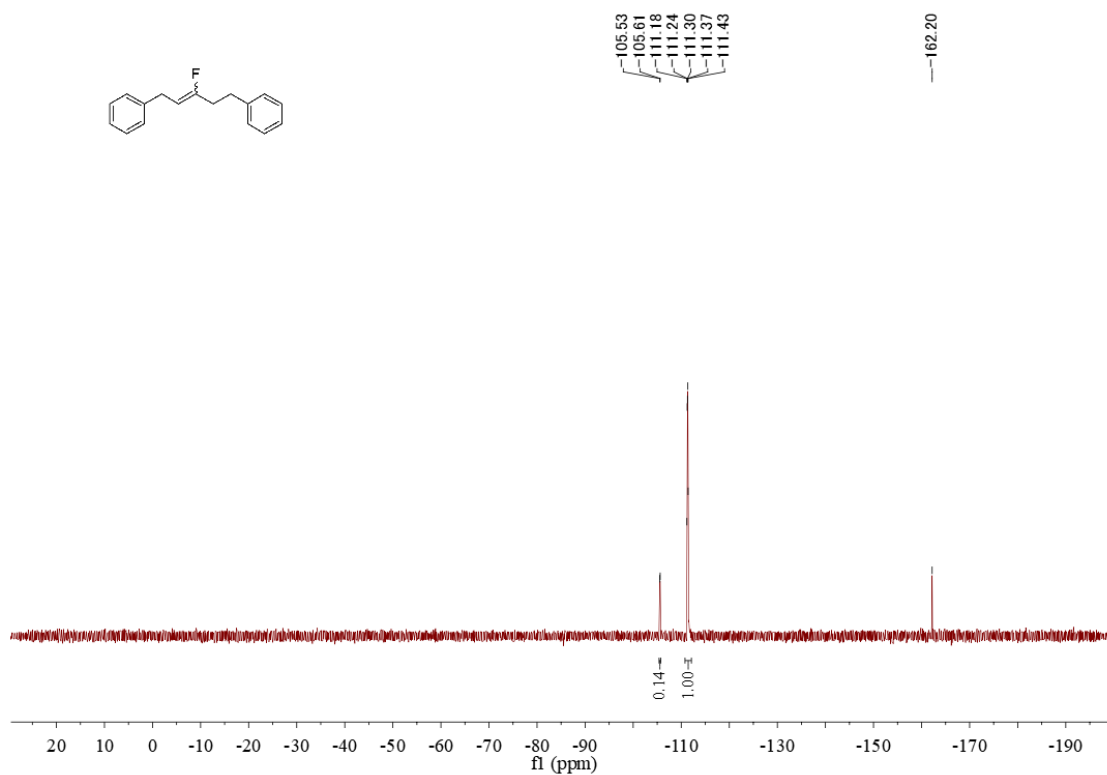

Figure S45.  $^1\text{H}$  NMR spectrum of **3e**, related to Figure 2

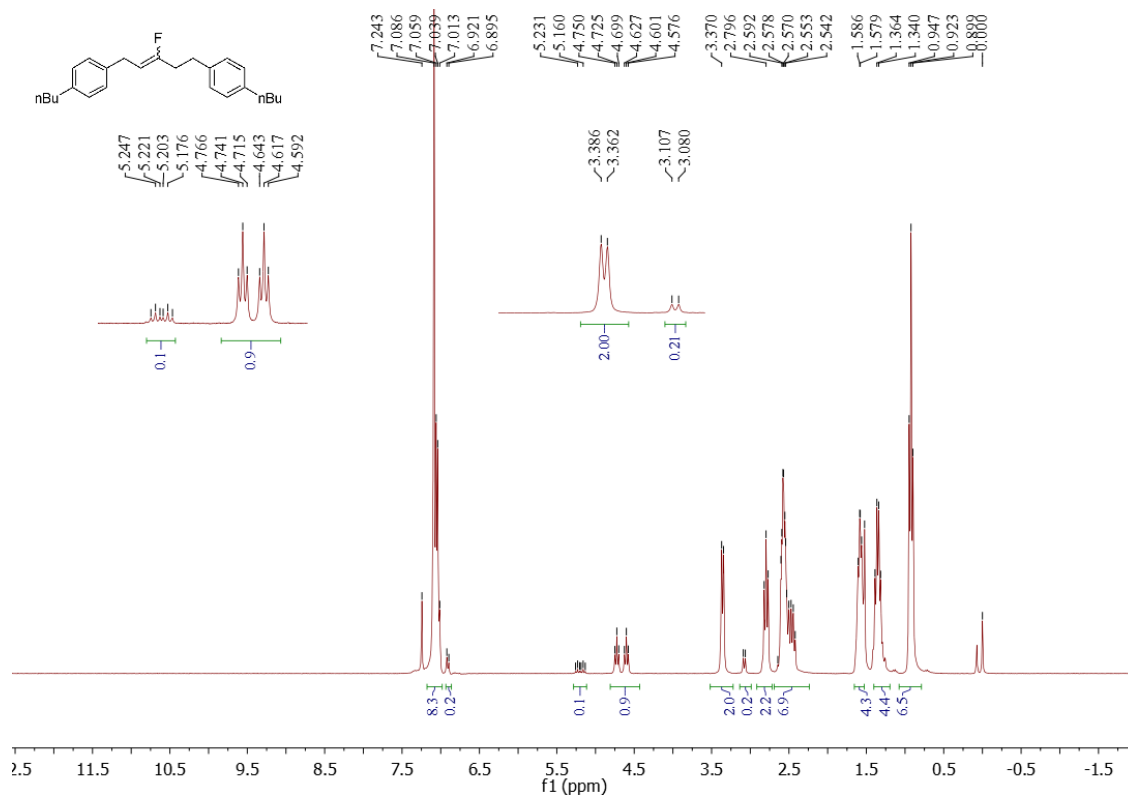



Figure S46.  $^{13}\text{C}$  NMR spectrum of **3e**, related to Figure 2

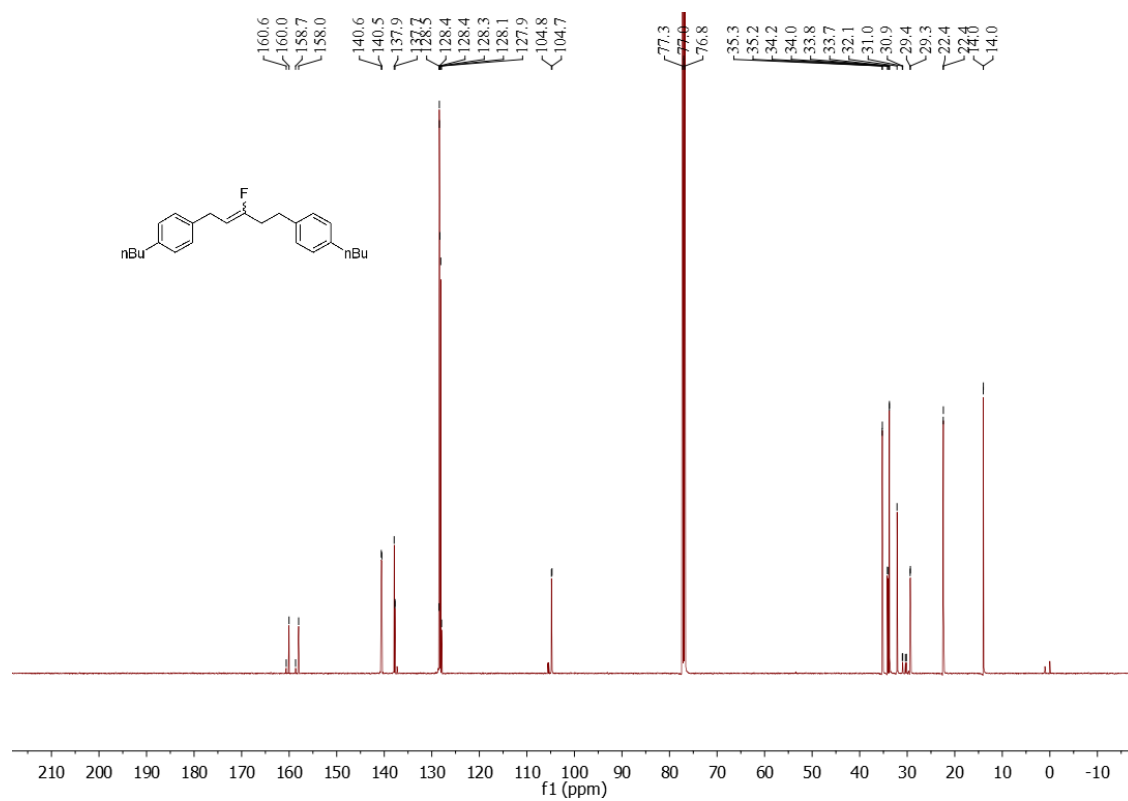

Figure S47.  $^{19}\text{F}$  NMR spectrum of **3e**, related to Figure 2

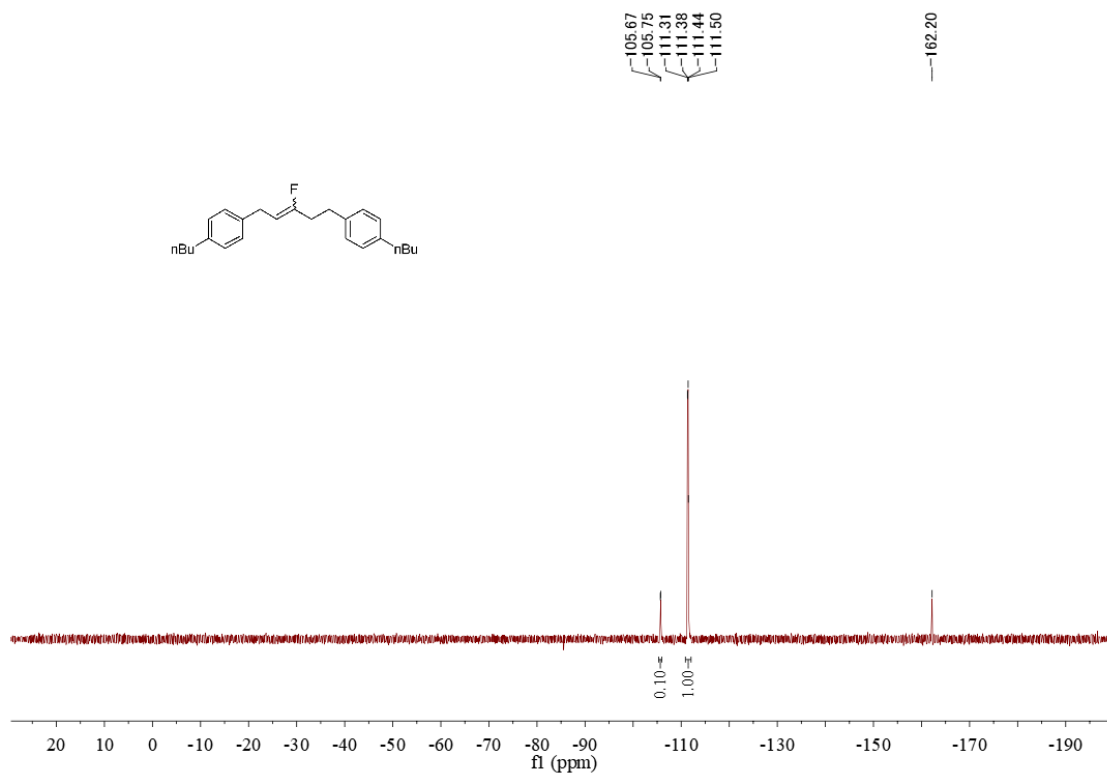

Figure S48. <sup>1</sup>H NMR spectrum of **3f**, related to Figure 2

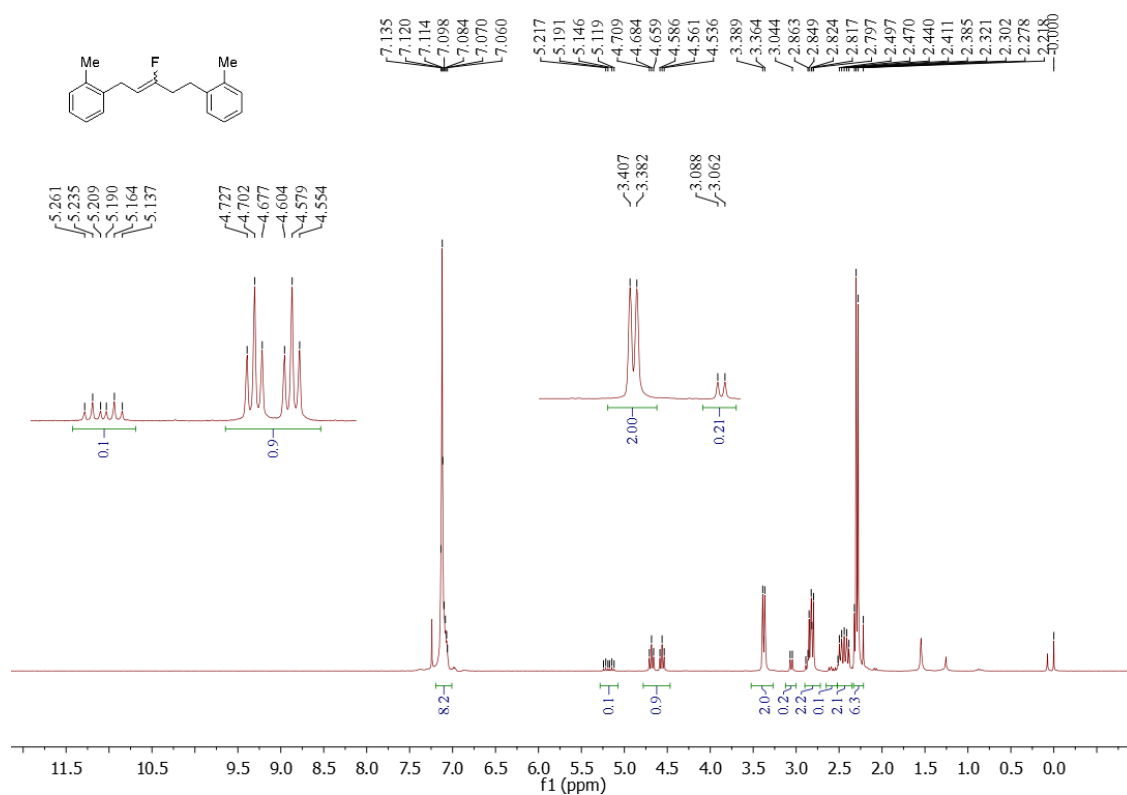

Figure S49. <sup>13</sup>C NMR spectrum of **3f**, related to Figure 2

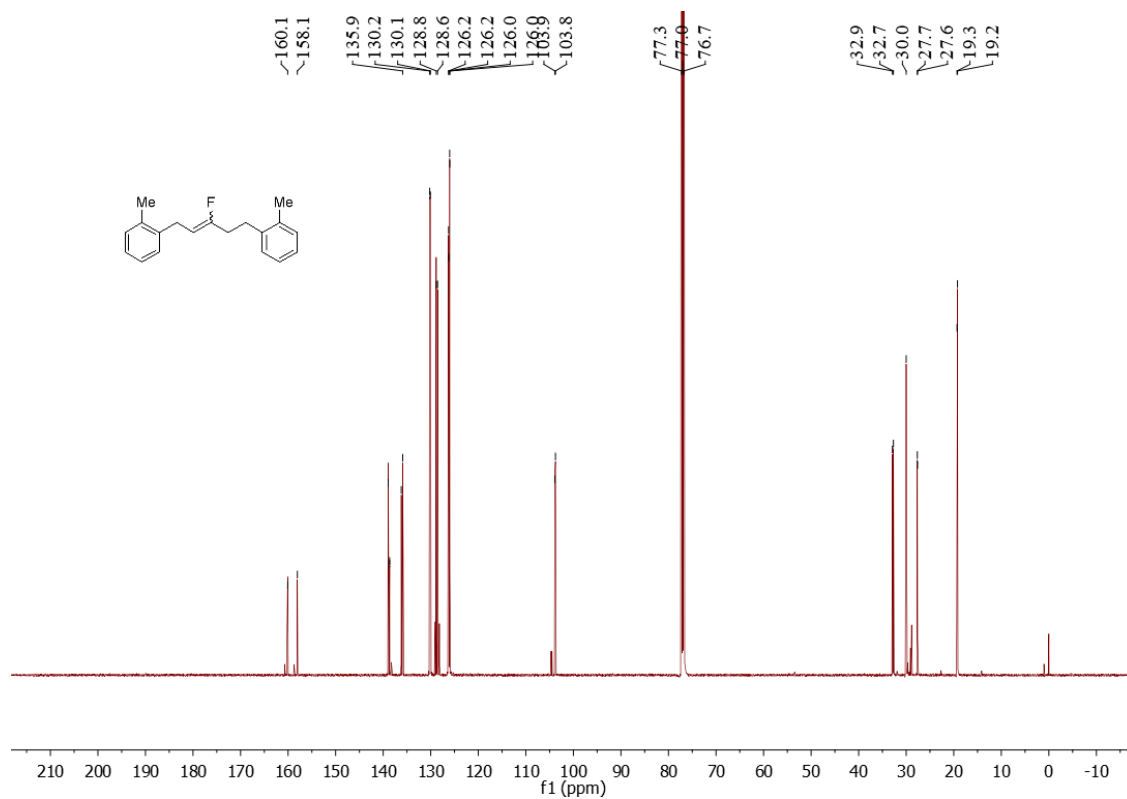

Figure S50.  $^{19}\text{F}$  NMR spectrum of **3f**, related to Figure 2

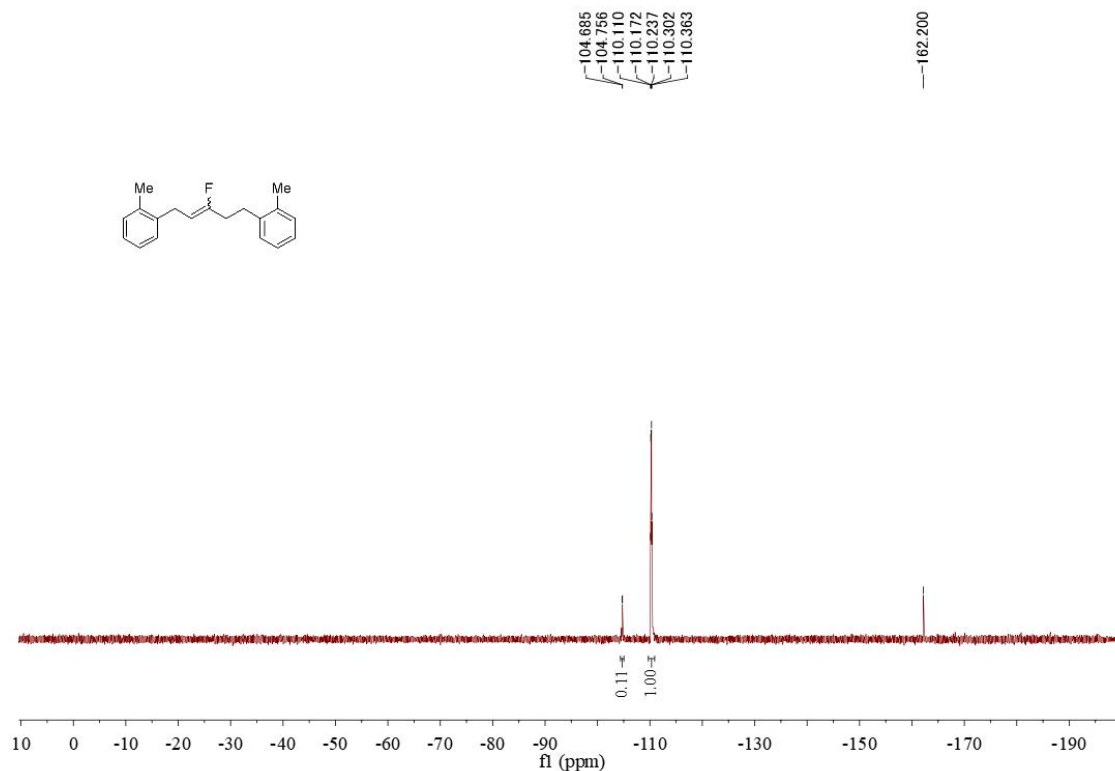

Figure S51.  $^1\text{H}$  NMR spectrum of **3g**, related to Figure 2

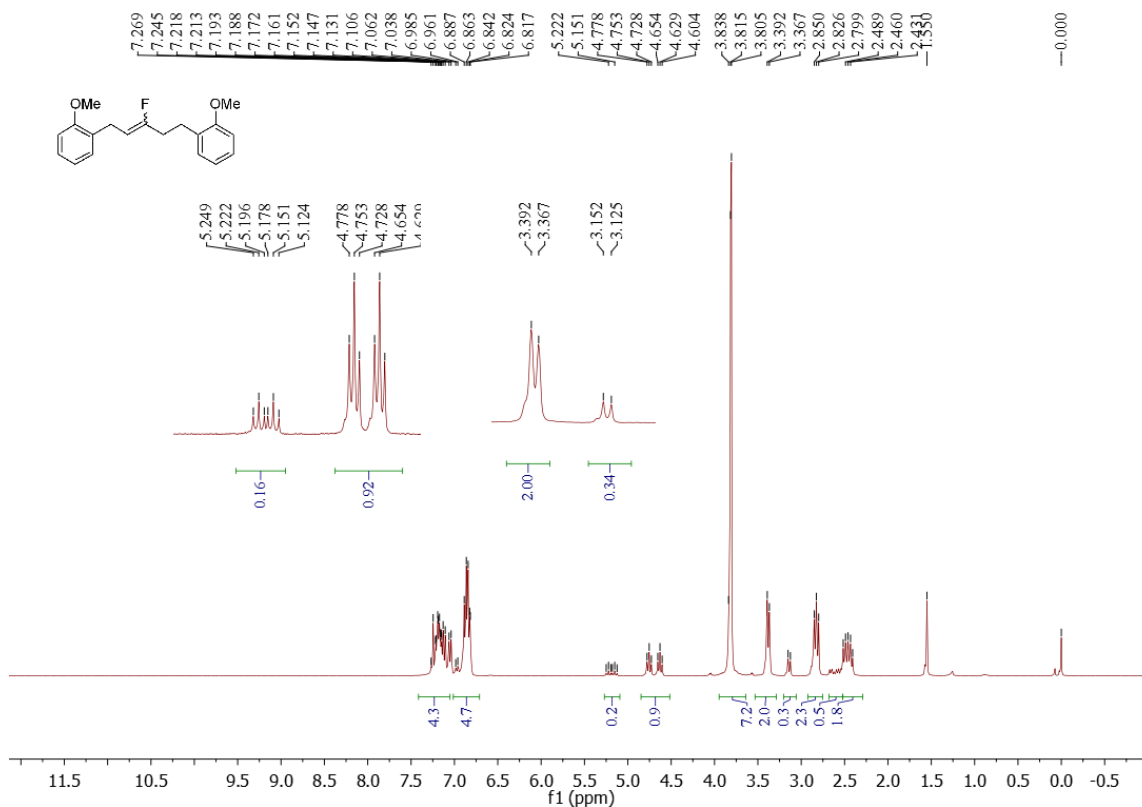

Figure S52.  $^{13}\text{C}$  NMR spectrum of **3g**, related to Figure 2

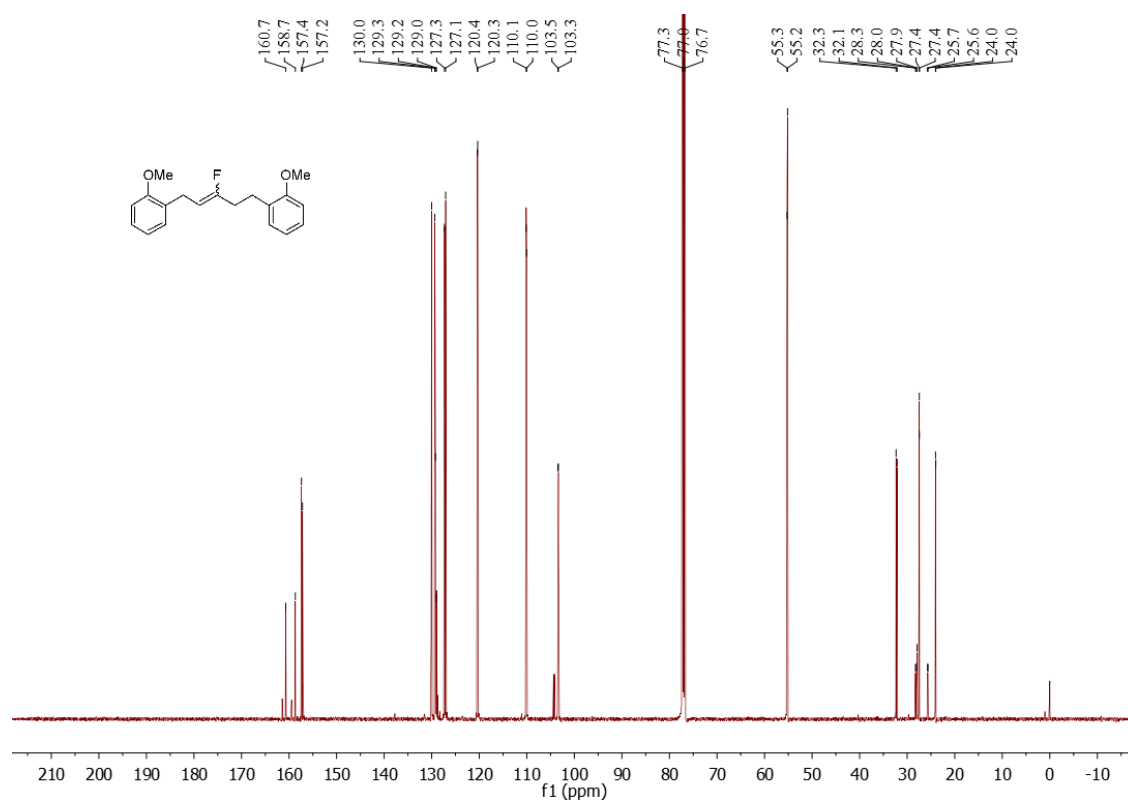

Figure S53.  $^{19}\text{F}$  NMR spectrum of **3g**, related to Figure 2

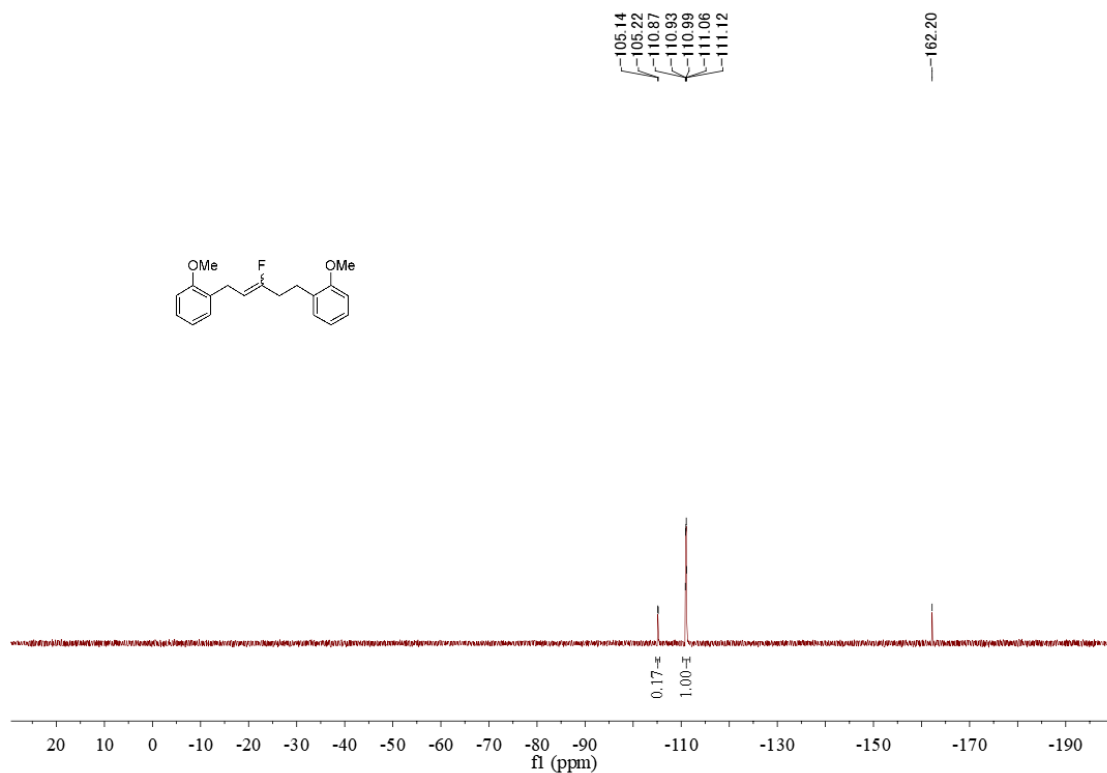

Figure S54. <sup>1</sup>H NMR spectrum of **3n**, related to Figure 2

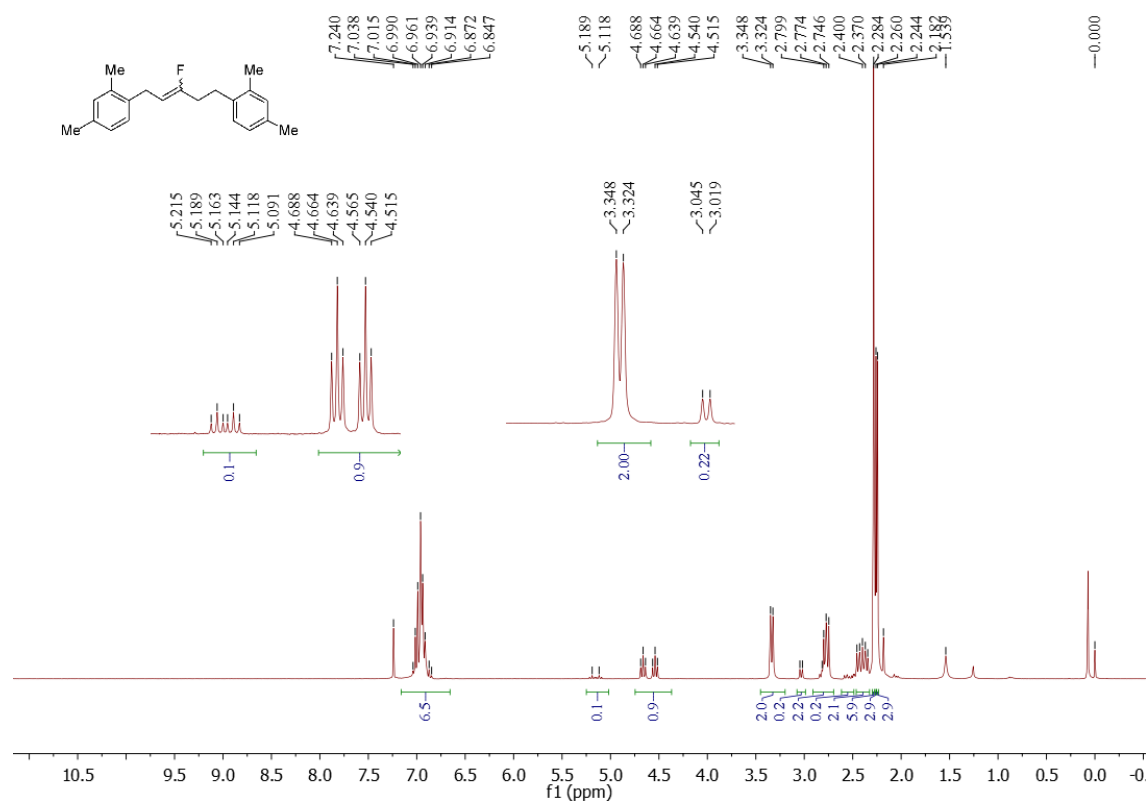

Figure S55. <sup>13</sup>C NMR spectrum of **3n**, related to Figure 2

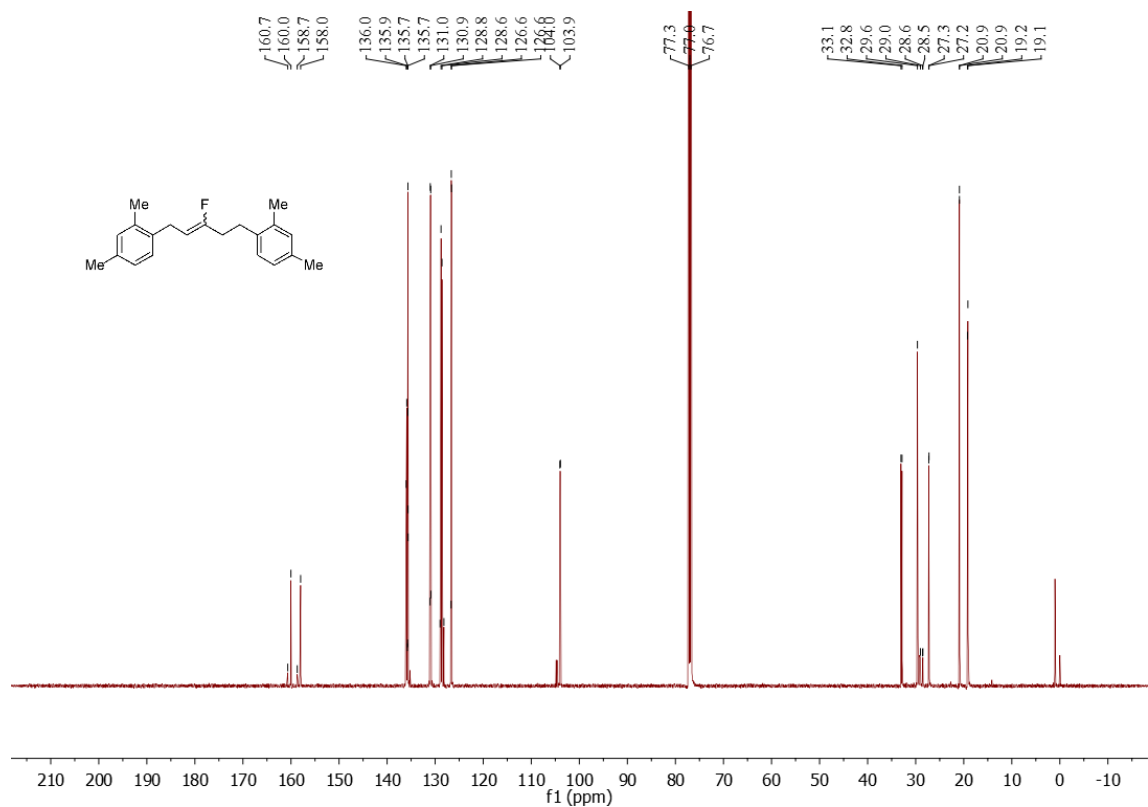

Figure S56.  $^{19}\text{F}$  NMR spectrum of **3n**, related to Figure 2

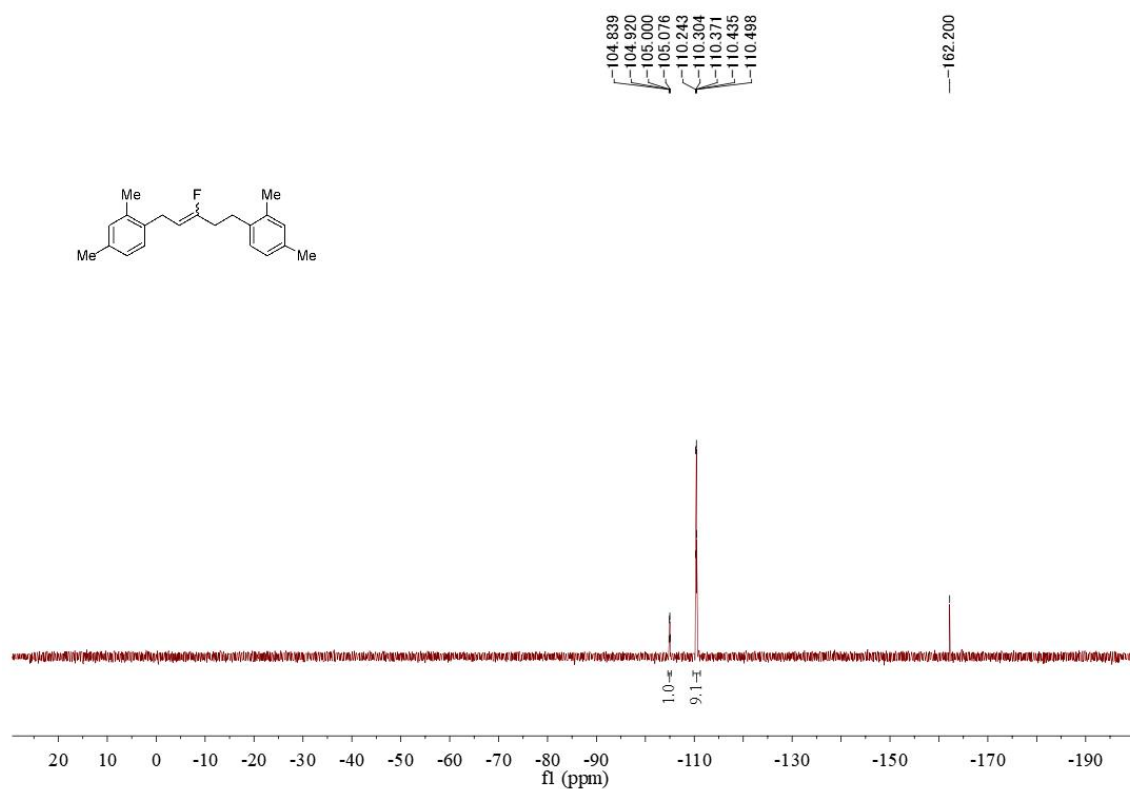

Figure S57.  $^1\text{H}$  NMR spectrum of **3o**, related to Figure 2

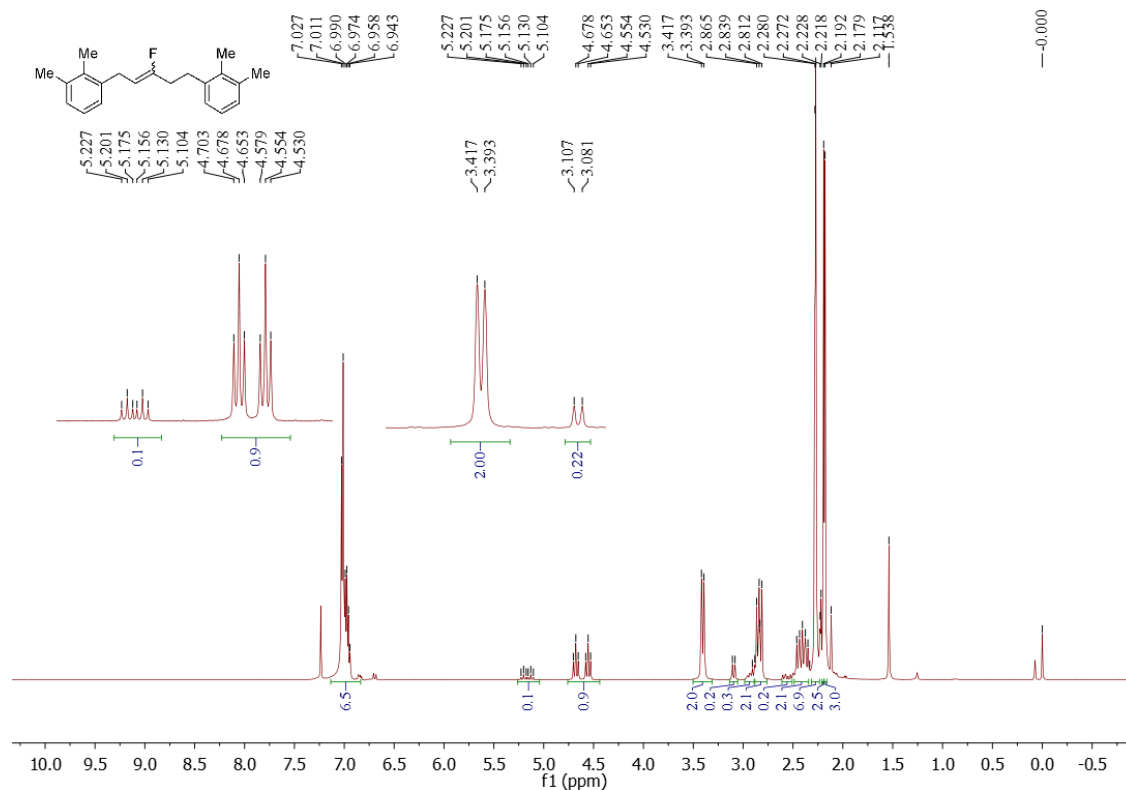

Figure S58.  $^{13}\text{C}$  NMR spectrum of **3o**, related to Figure 2

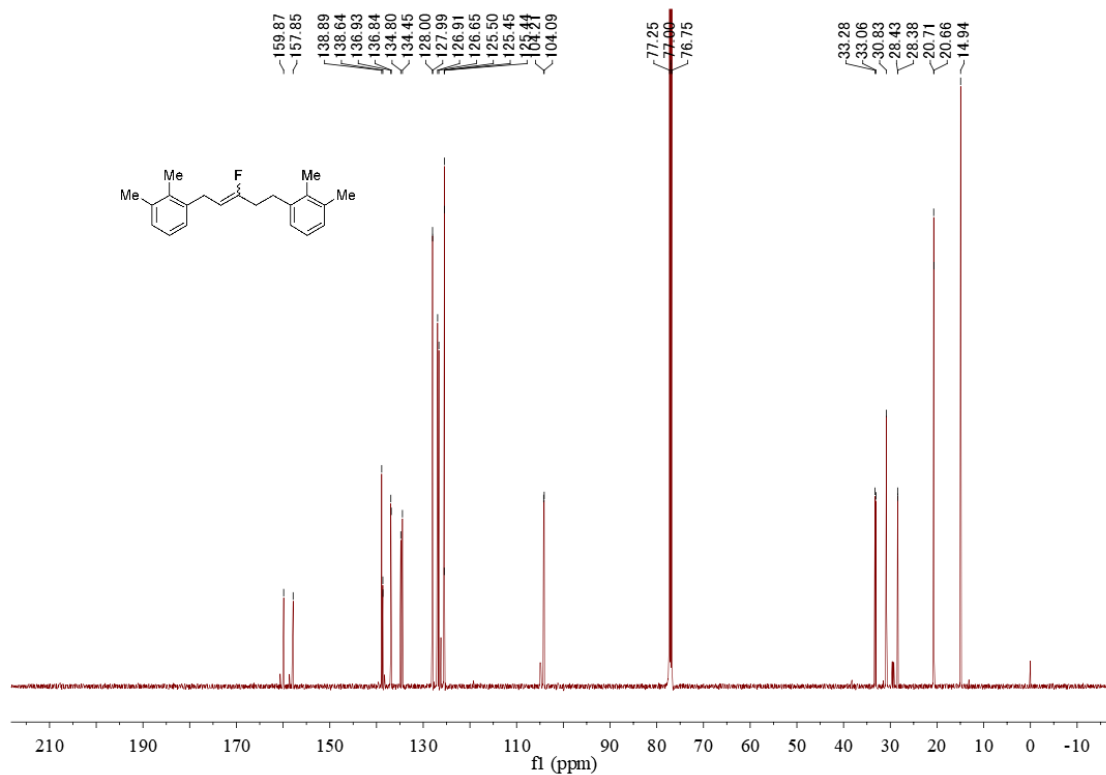

Figure S59.  $^{19}\text{F}$  NMR spectrum of **3o**, related to Figure 2

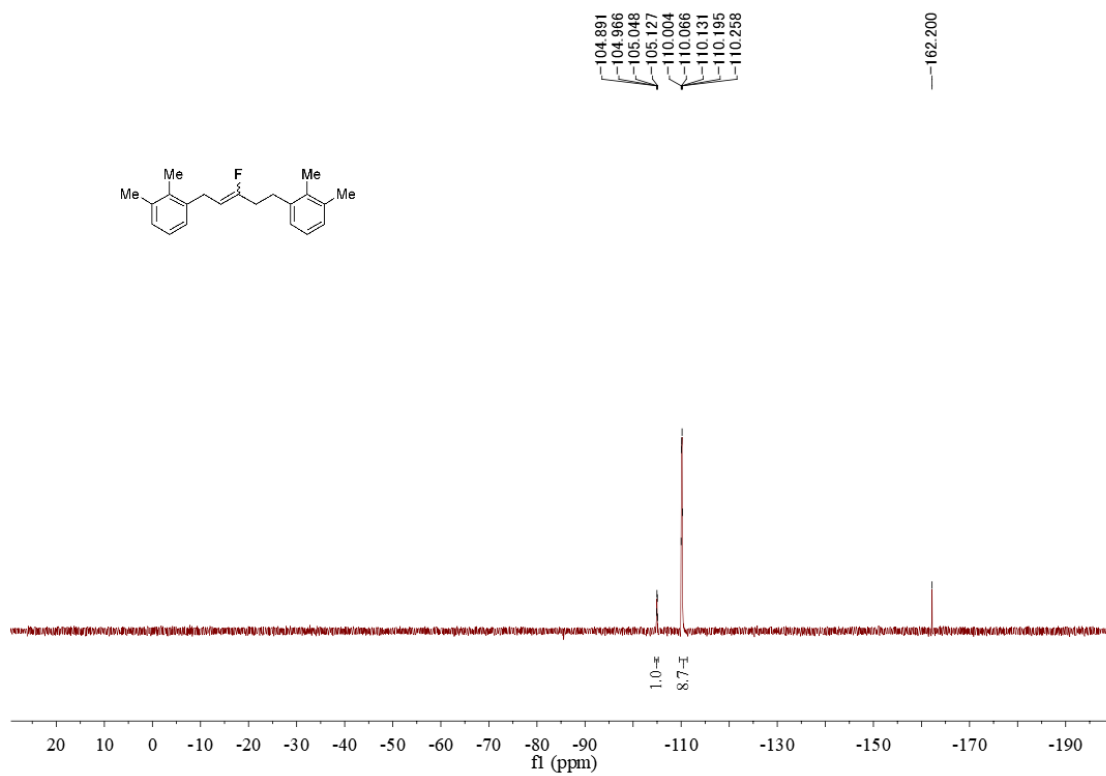

Figure S60. <sup>1</sup>H NMR spectrum of **3j**, related to Figure 2

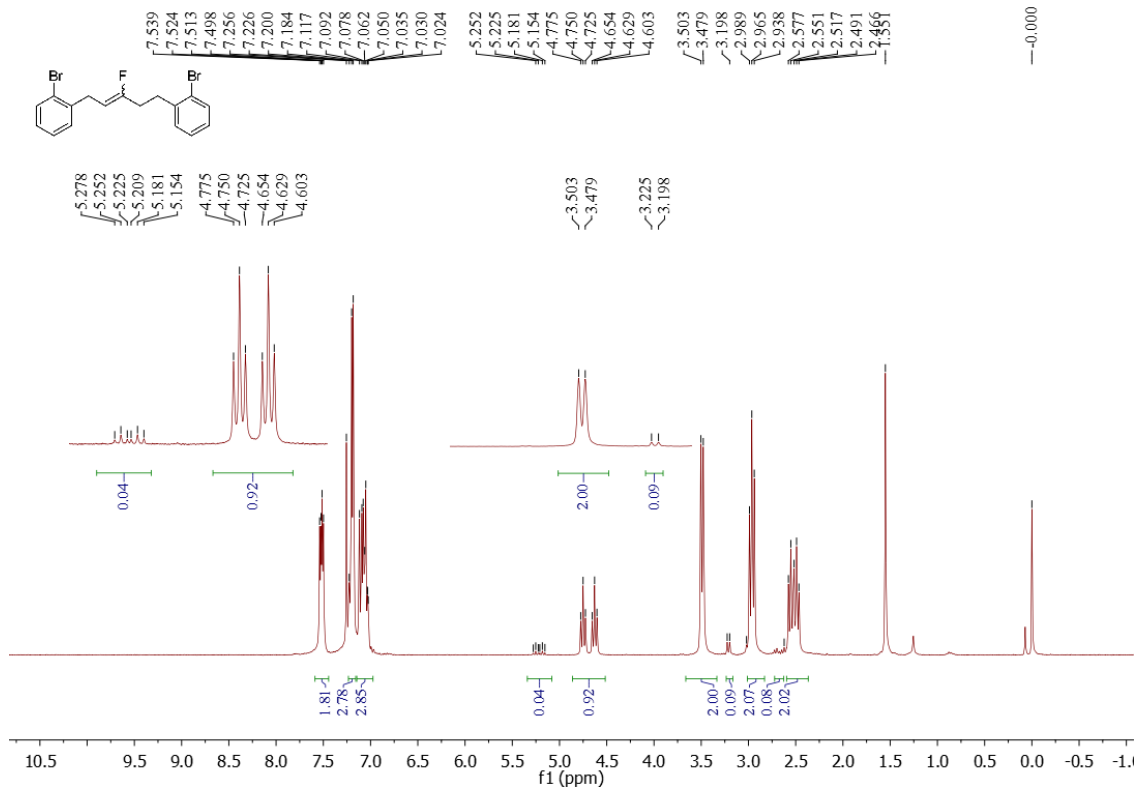

Figure S61. <sup>13</sup>C NMR spectrum of **3j**, related to Figure 2

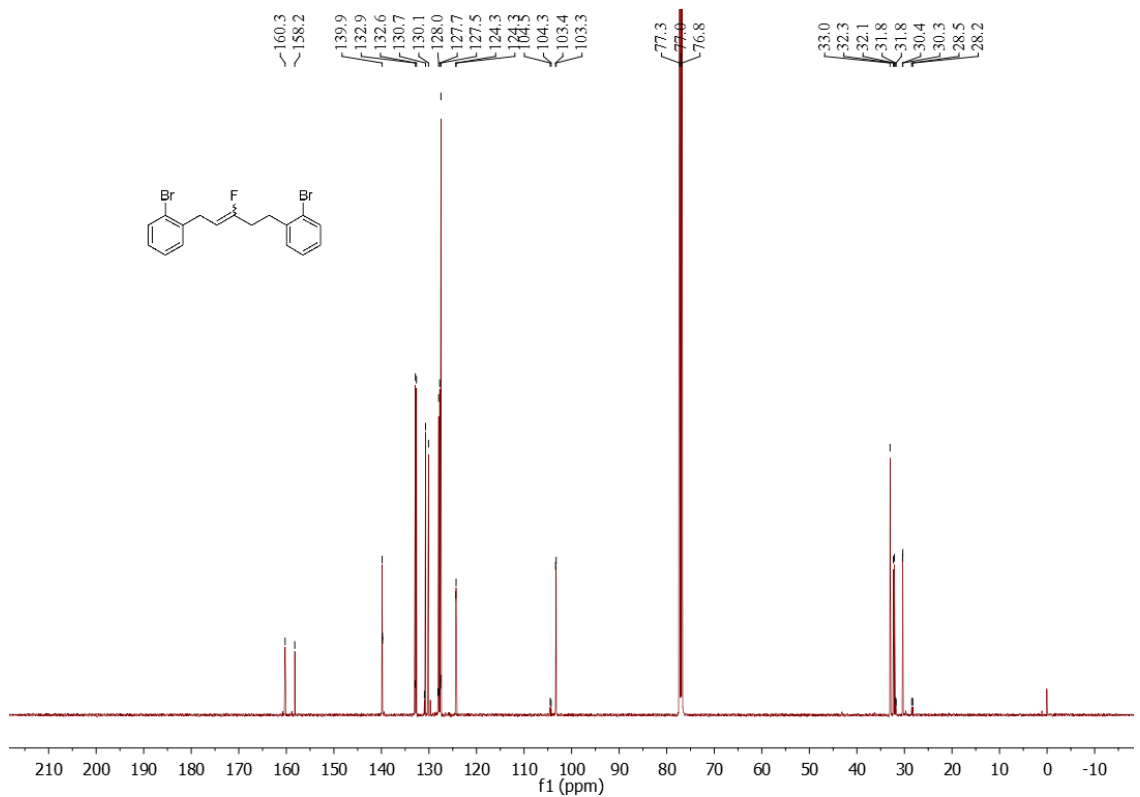



Figure S62. <sup>19</sup>F NMR spectrum of **3j**, related to Figure 2

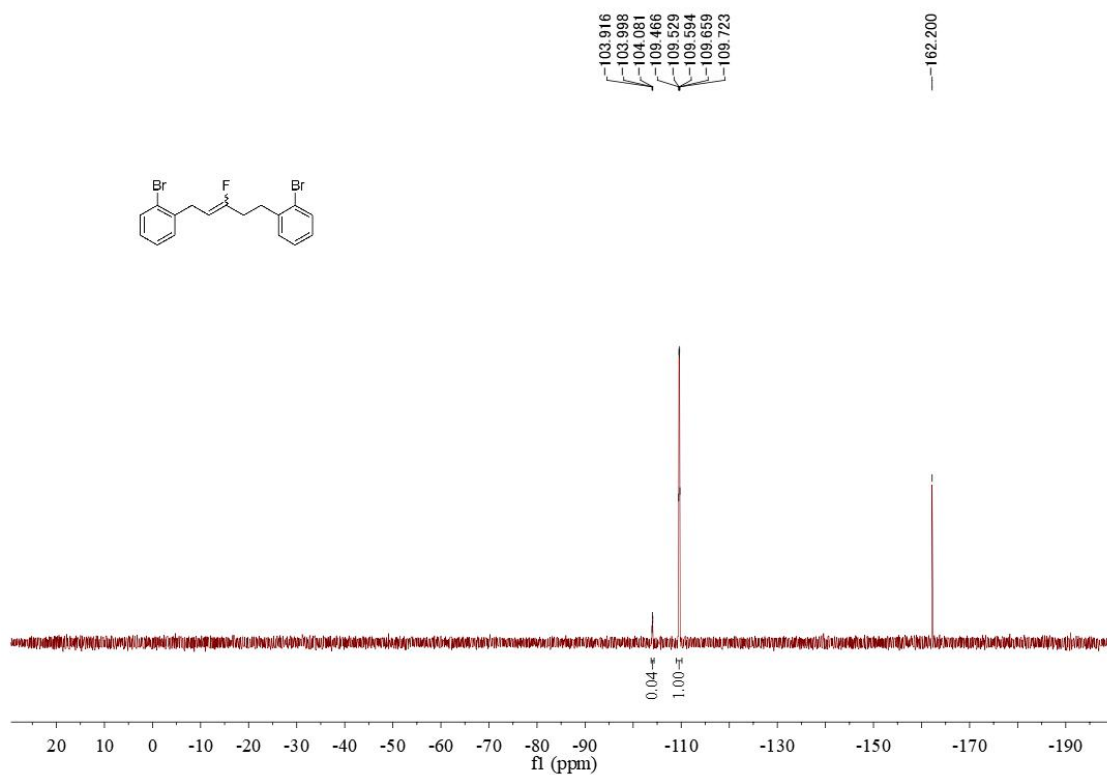

Figure S63. <sup>1</sup>H NMR spectrum of **3k**, related to Figure 2

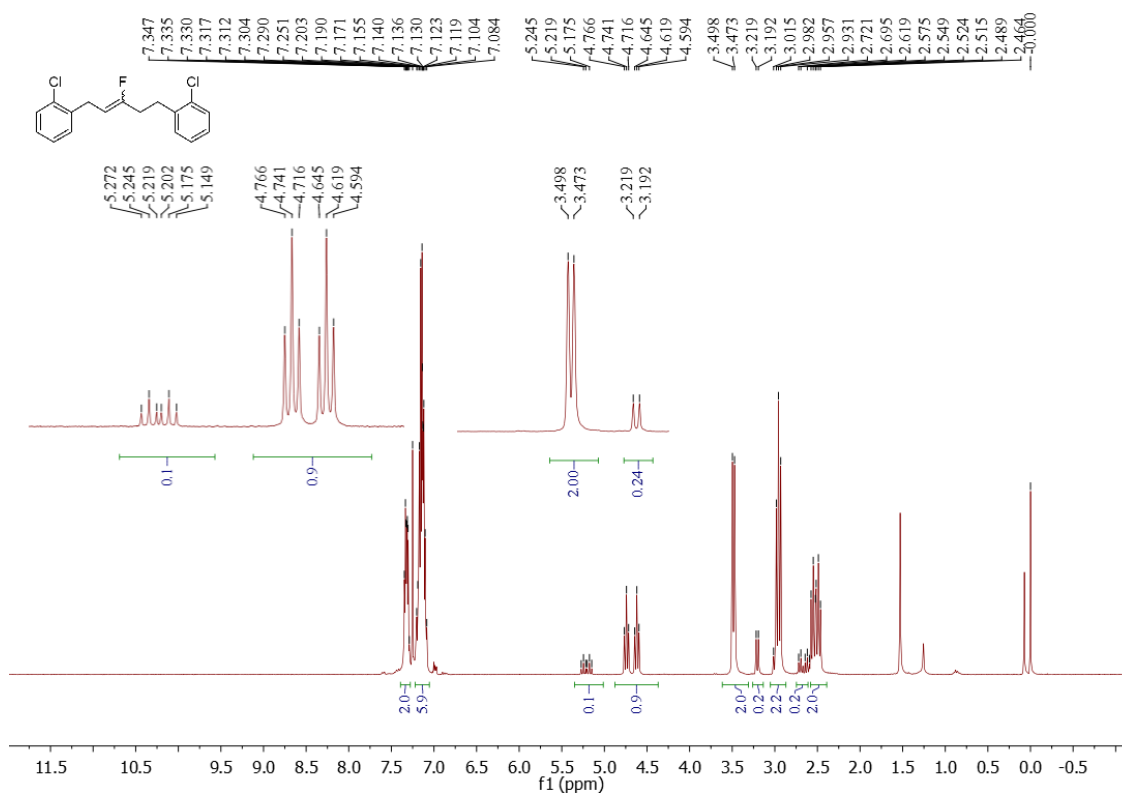

Figure S64. <sup>13</sup>C NMR spectrum of **3k**, related to Figure 2

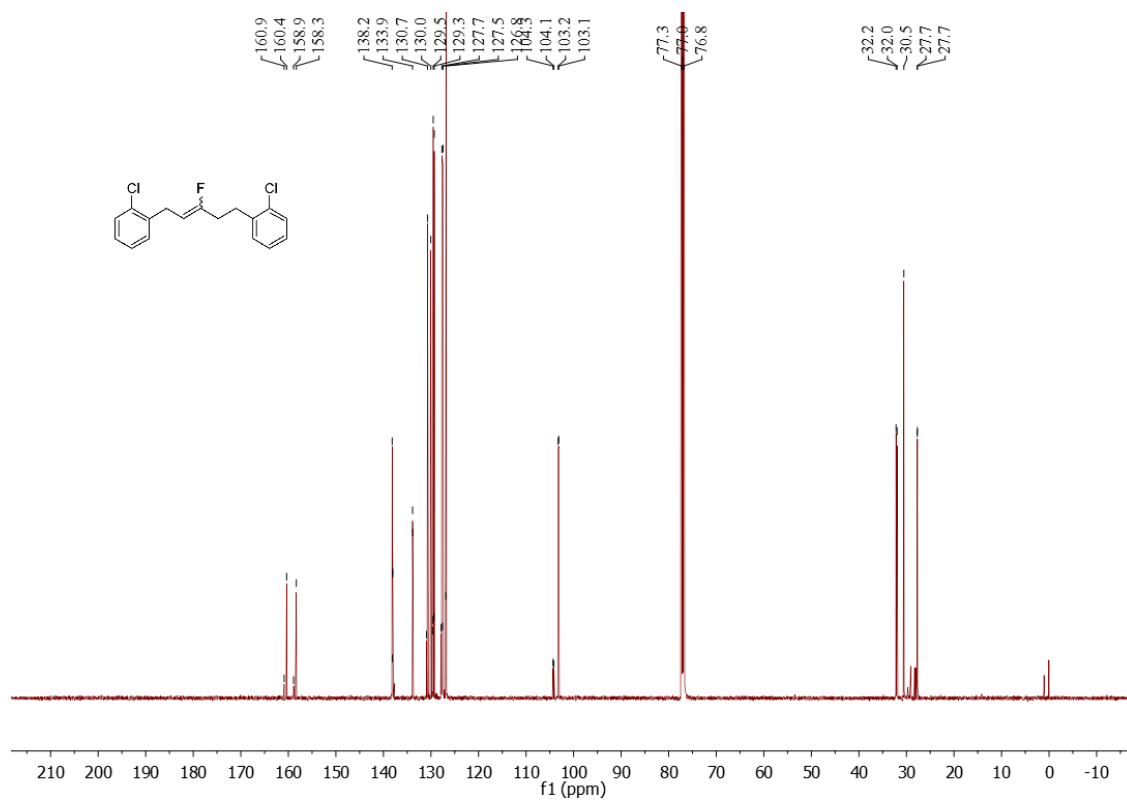

Figure S65. <sup>19</sup>F NMR spectrum of **3k**, related to Figure 2

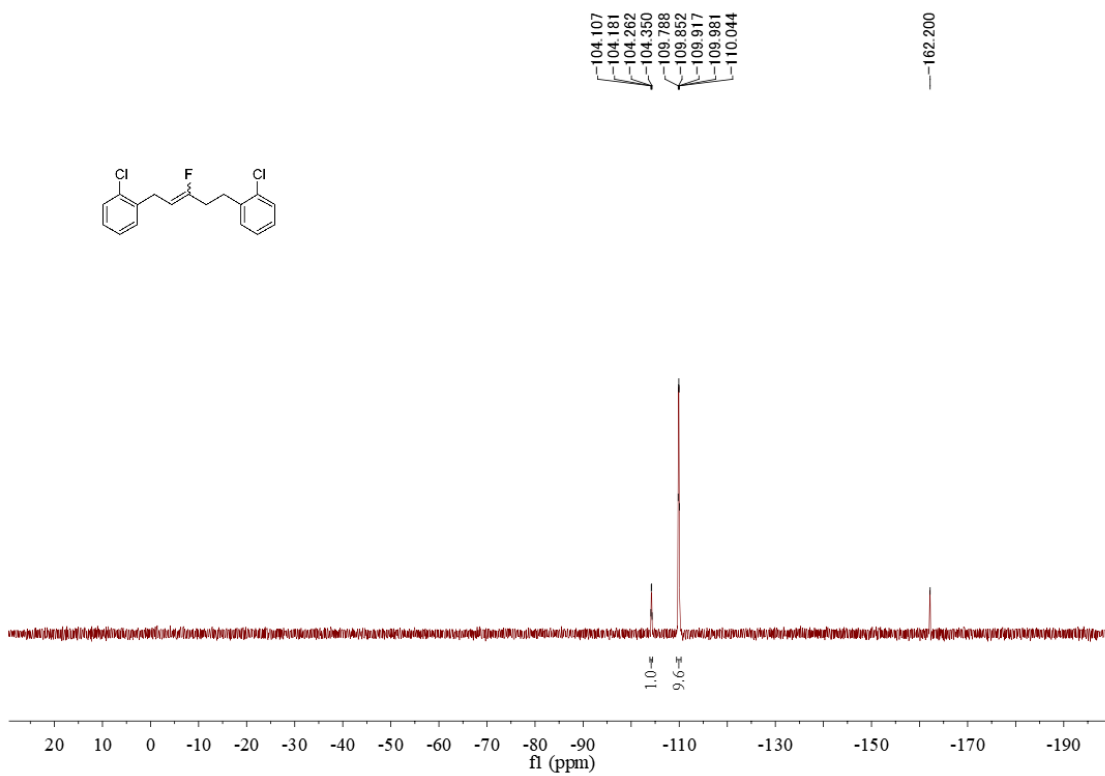

Figure S66. <sup>1</sup>H NMR spectrum of **3u**, related to Figure 2

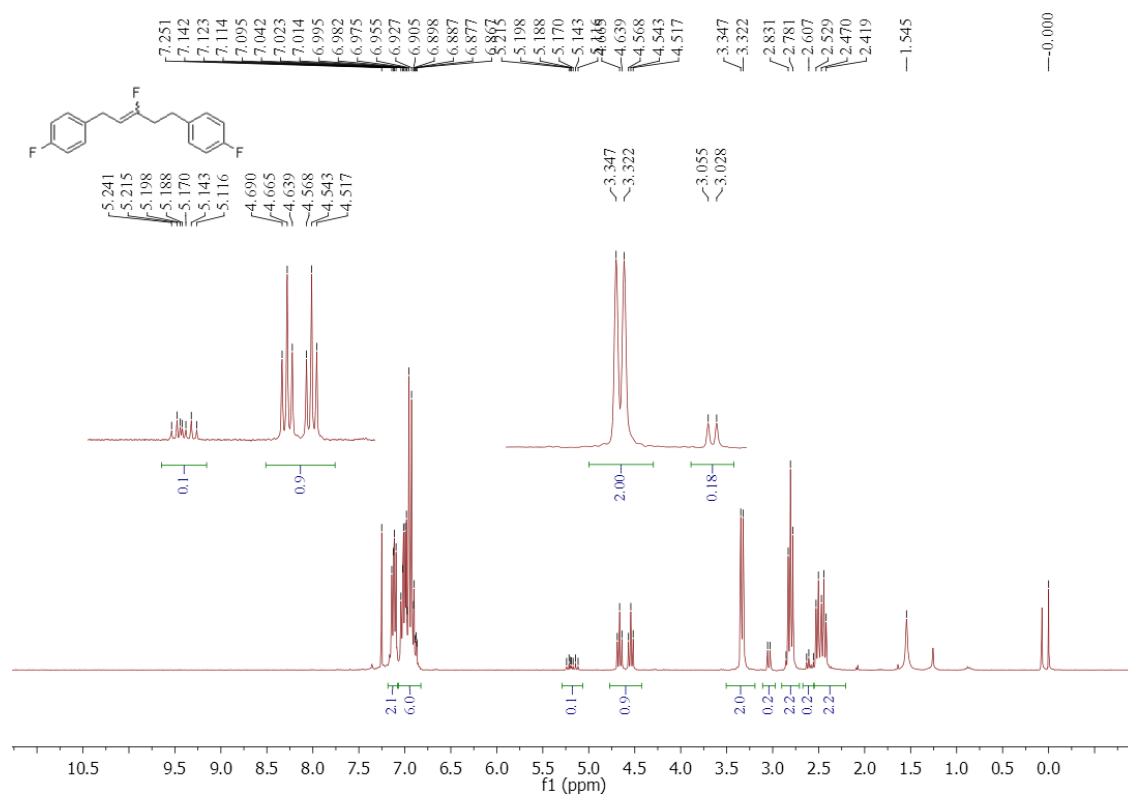

Figure S67. <sup>13</sup>C NMR spectrum of **3u**, related to Figure 2

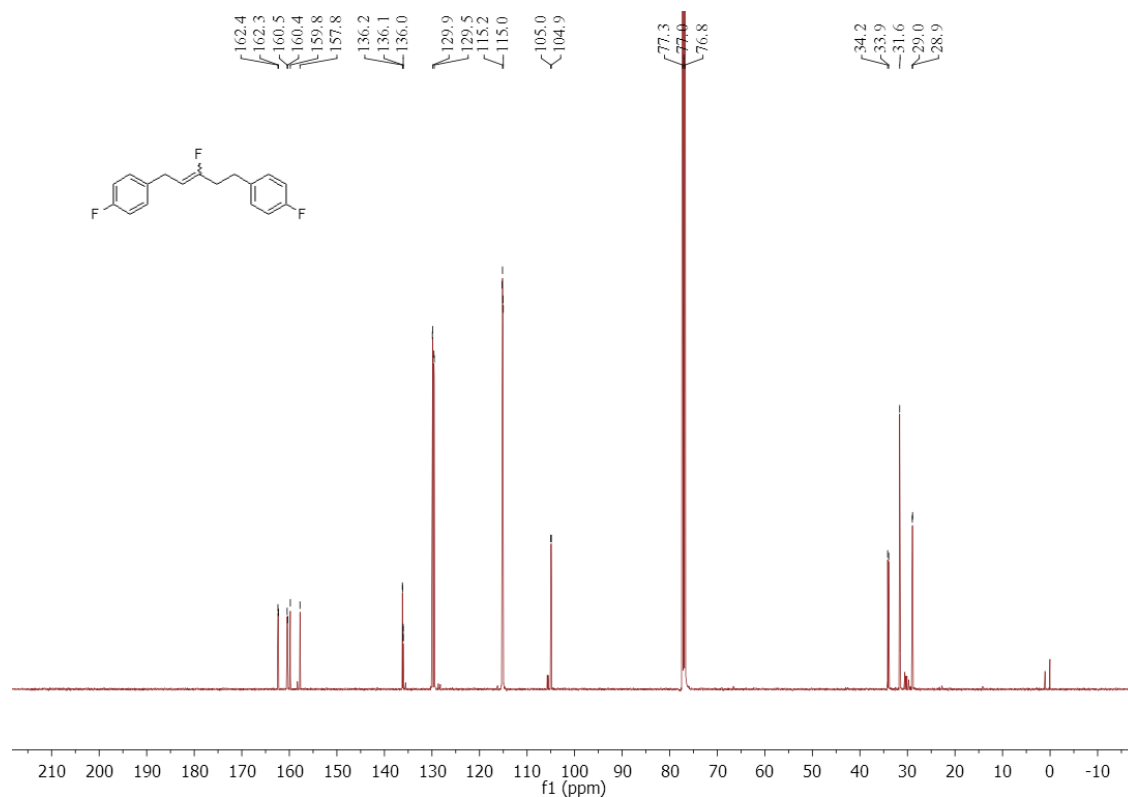

Figure S68.  $^{19}\text{F}$  NMR spectrum of **3u**, related to Figure 2

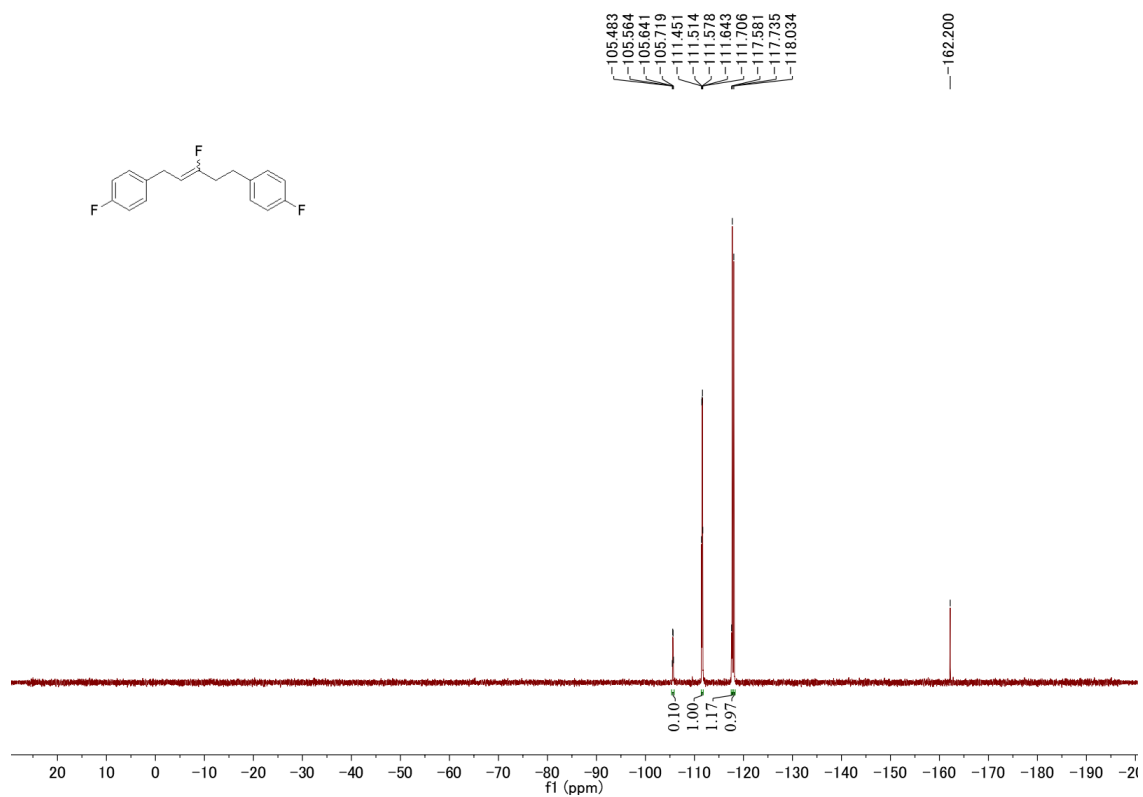

Figure S69.  $^1\text{H}$  NMR spectrum of **3aa**, related to Figure 2

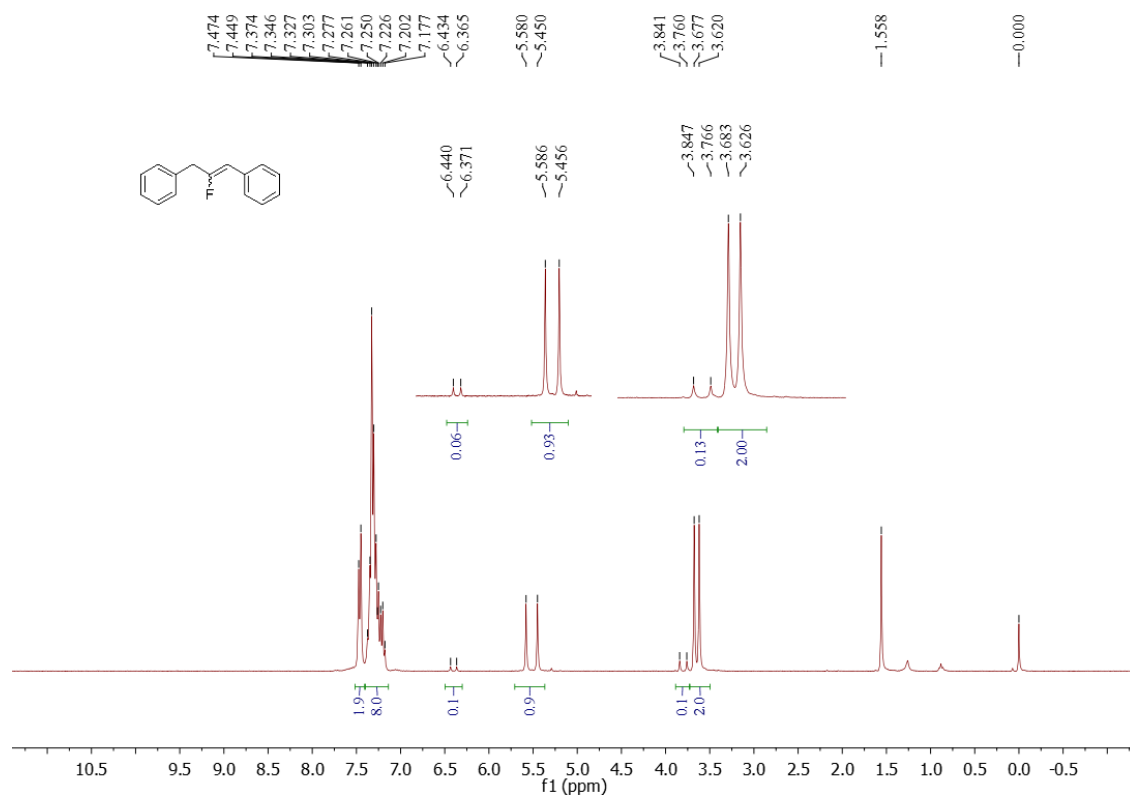

Figure S70. <sup>19</sup>F NMR spectrum of **3aa**, related to Figure 2

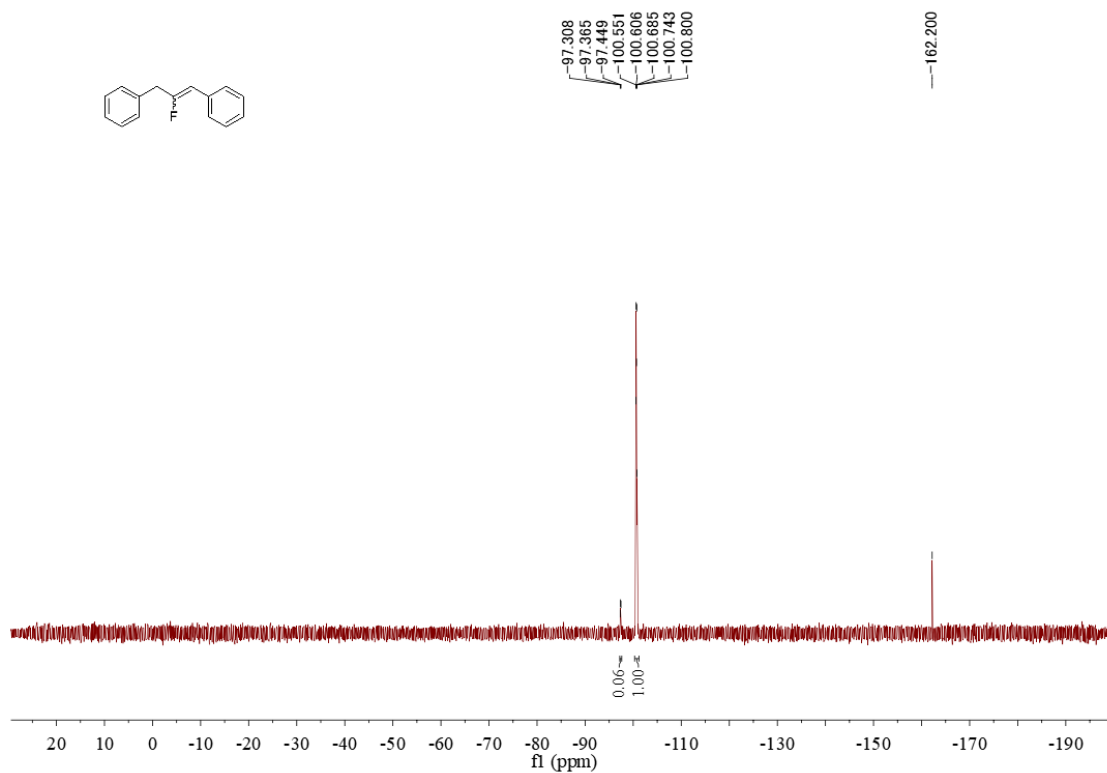

Figure S71. <sup>1</sup>H NMR spectrum of **3bb**, related to Figure 2

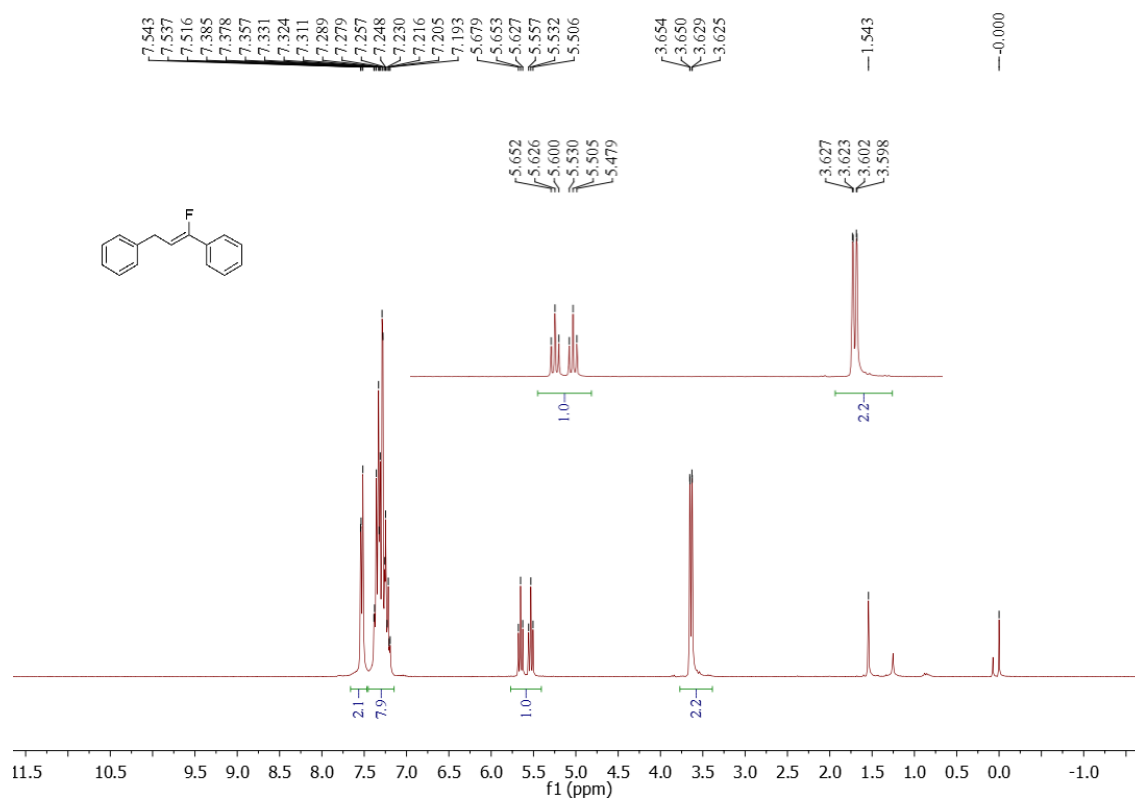

Figure S72.  $^{19}\text{F}$  NMR spectrum of **3bb**, related to Figure 2

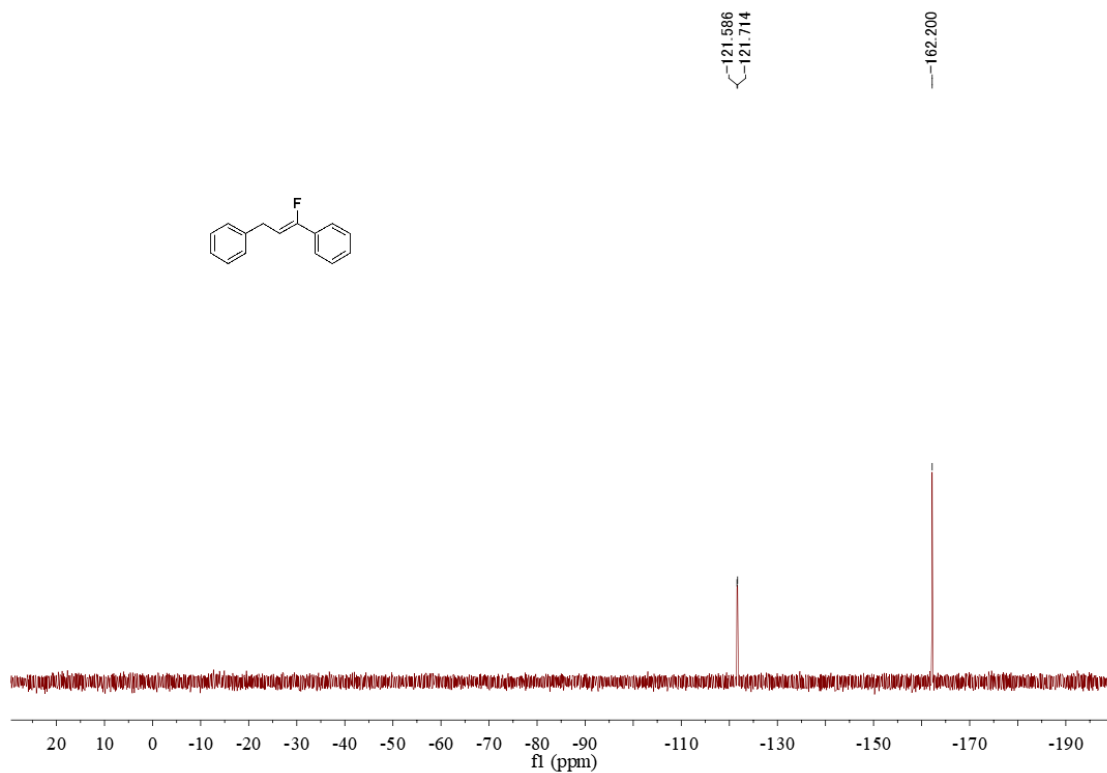

Figure S73.  $^1\text{H}$  NMR spectrum of **3cc**, related to Figure 2

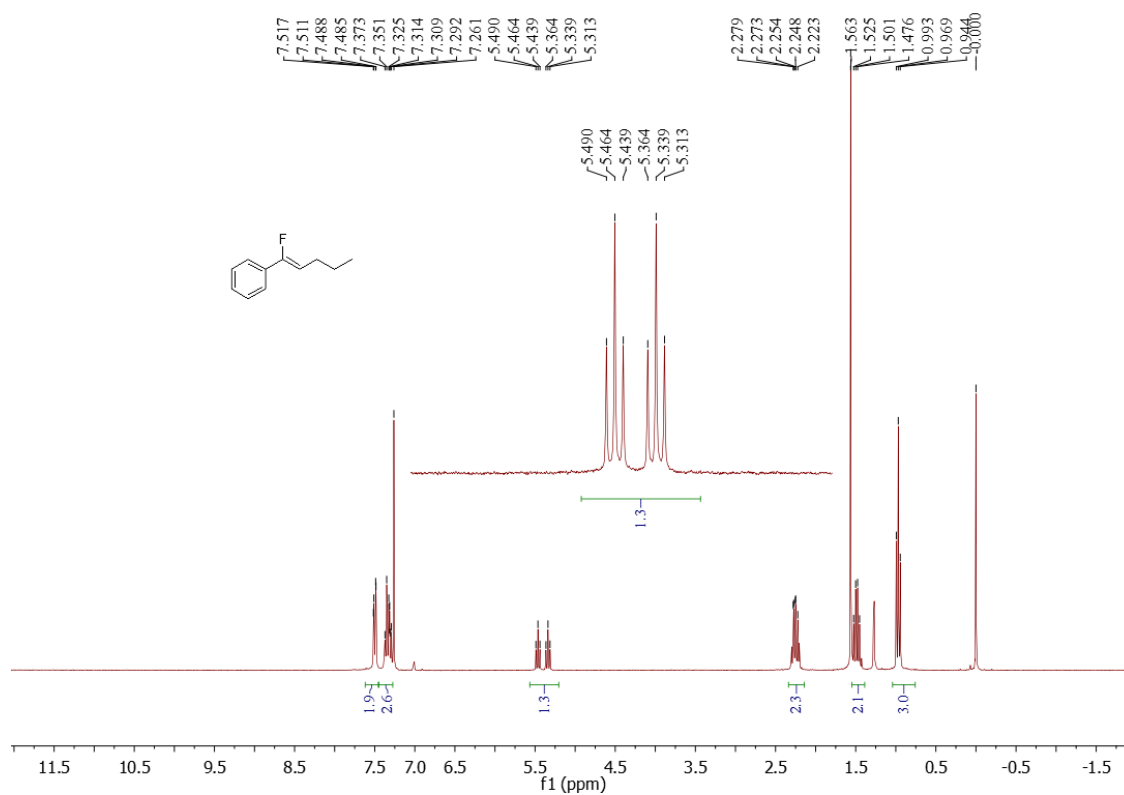

Figure S74.  $^{19}\text{F}$  NMR spectrum of **3cc**, related to Figure 2

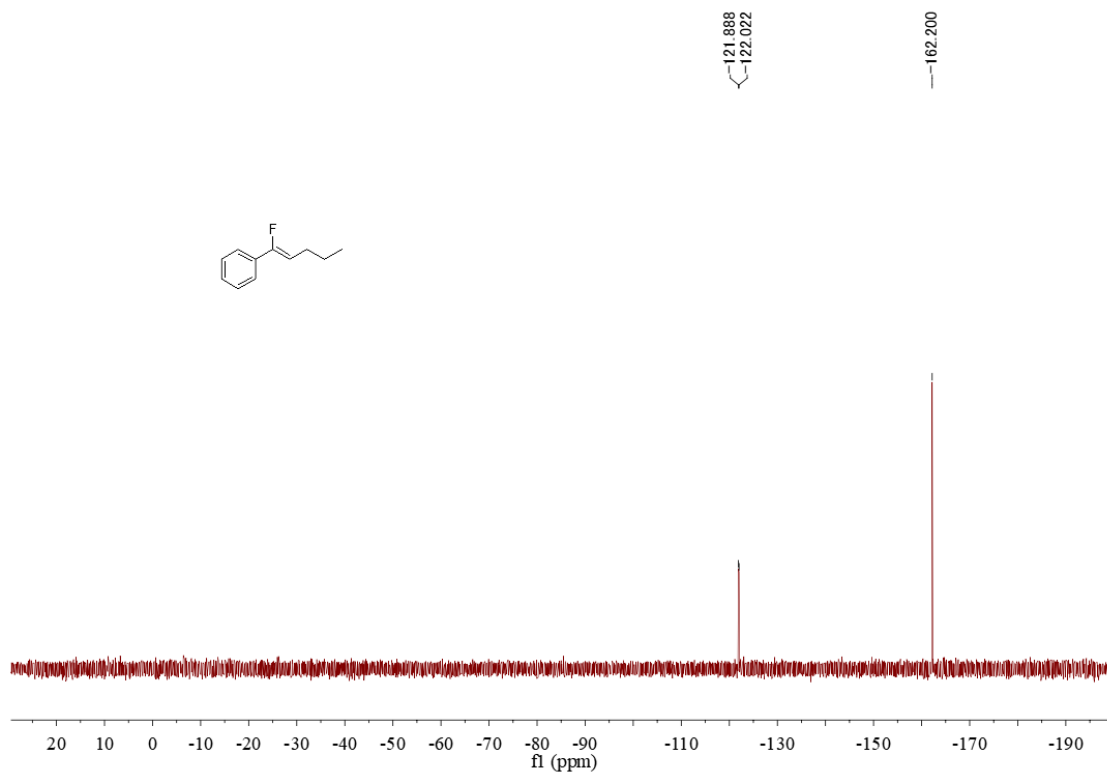

Figure S75.  $^1\text{H}$  NMR spectrum of **3dd**, related to Figure 2

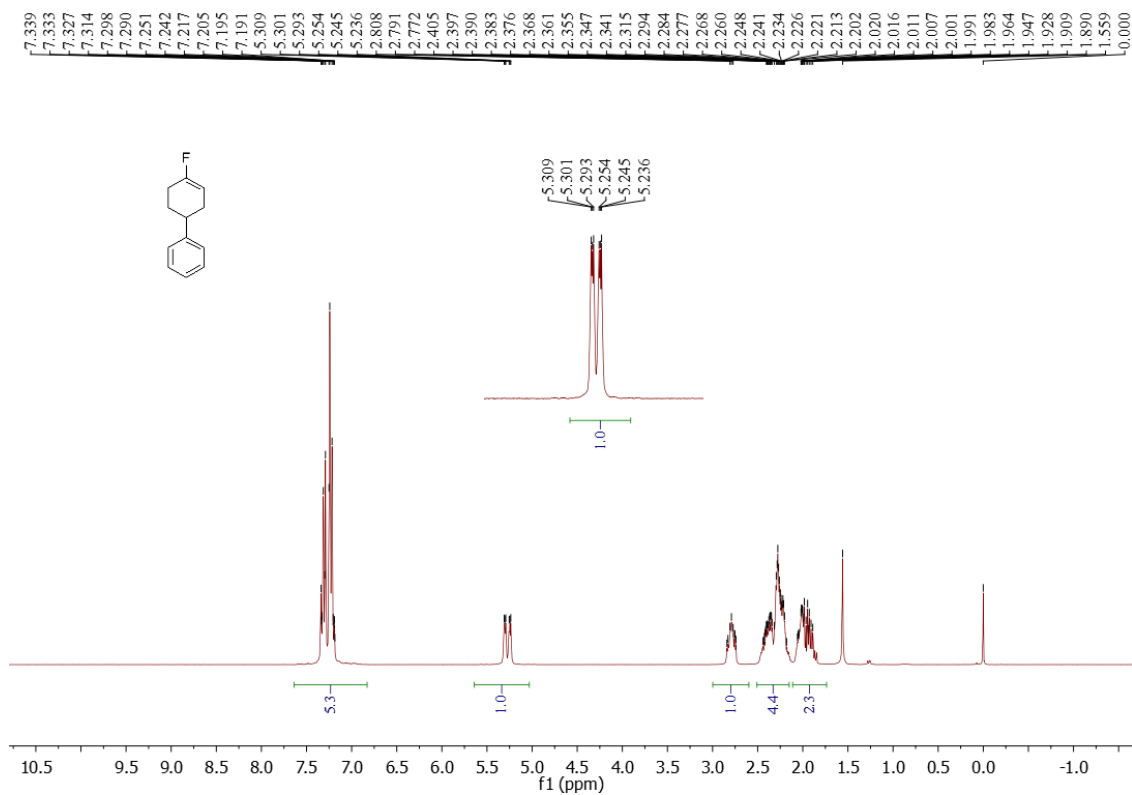

Figure S76.  $^{19}\text{F}$  NMR spectrum of **3dd**, related to Figure 2

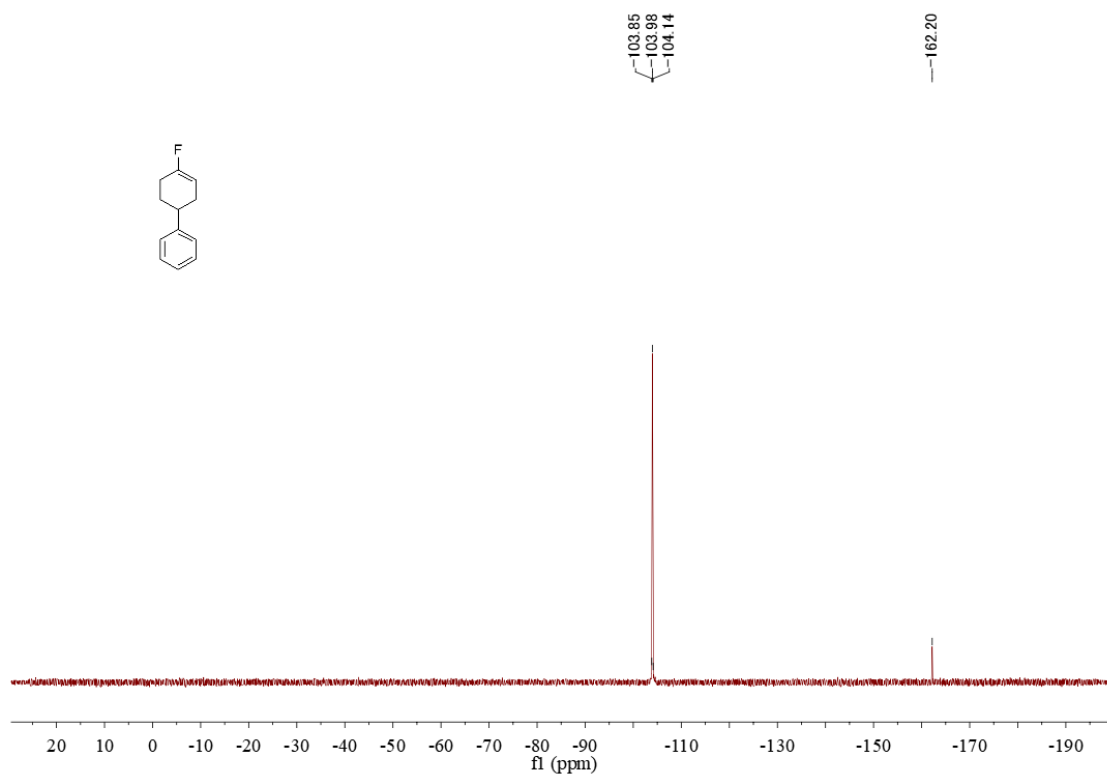

Figure S77.  $^1\text{H}$  NMR spectrum of **3ee**, related to Figure 2

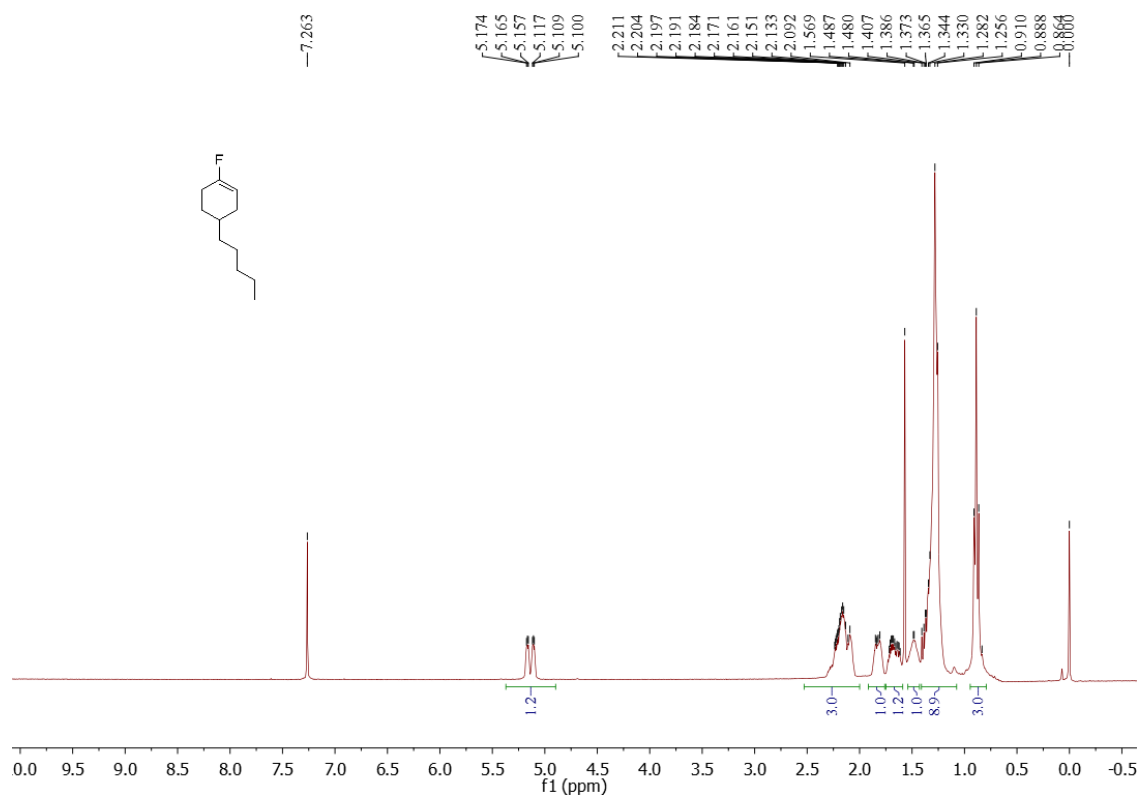



Figure S78.  $^{19}\text{F}$  NMR spectrum of **3ee**, related to Figure 2

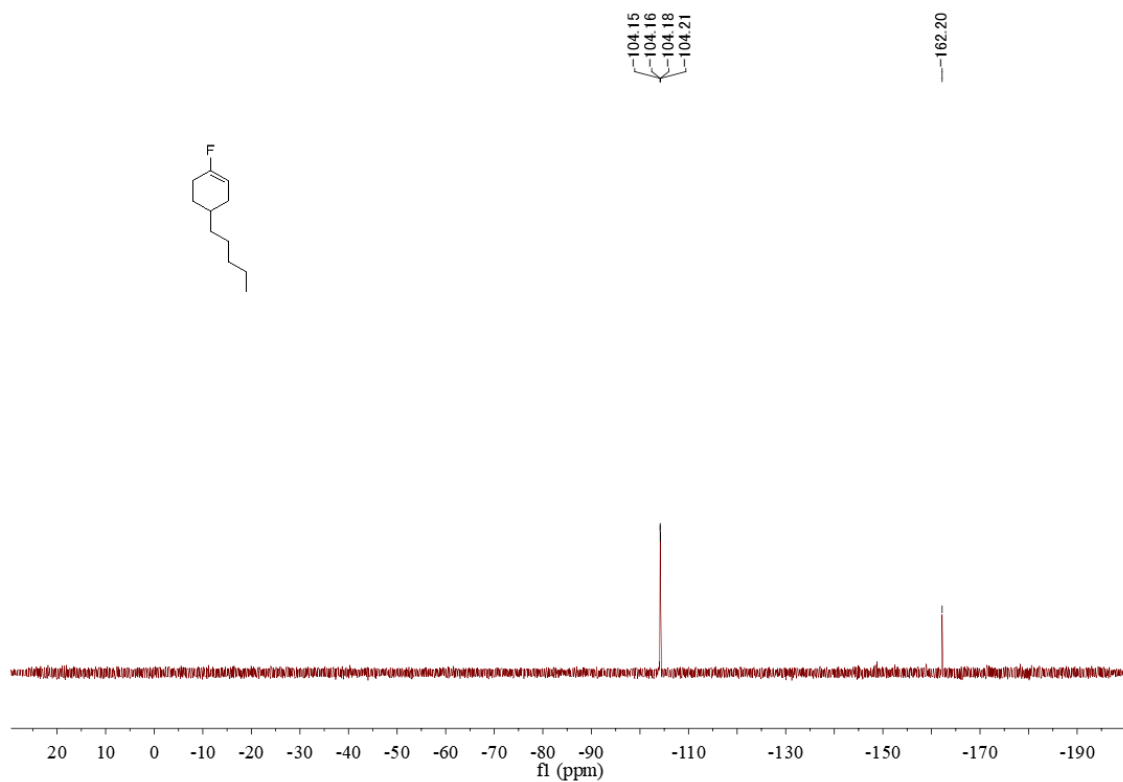

Figure S79.  $^1\text{H}$  NMR spectrum of **3ff**, related to Figure 2

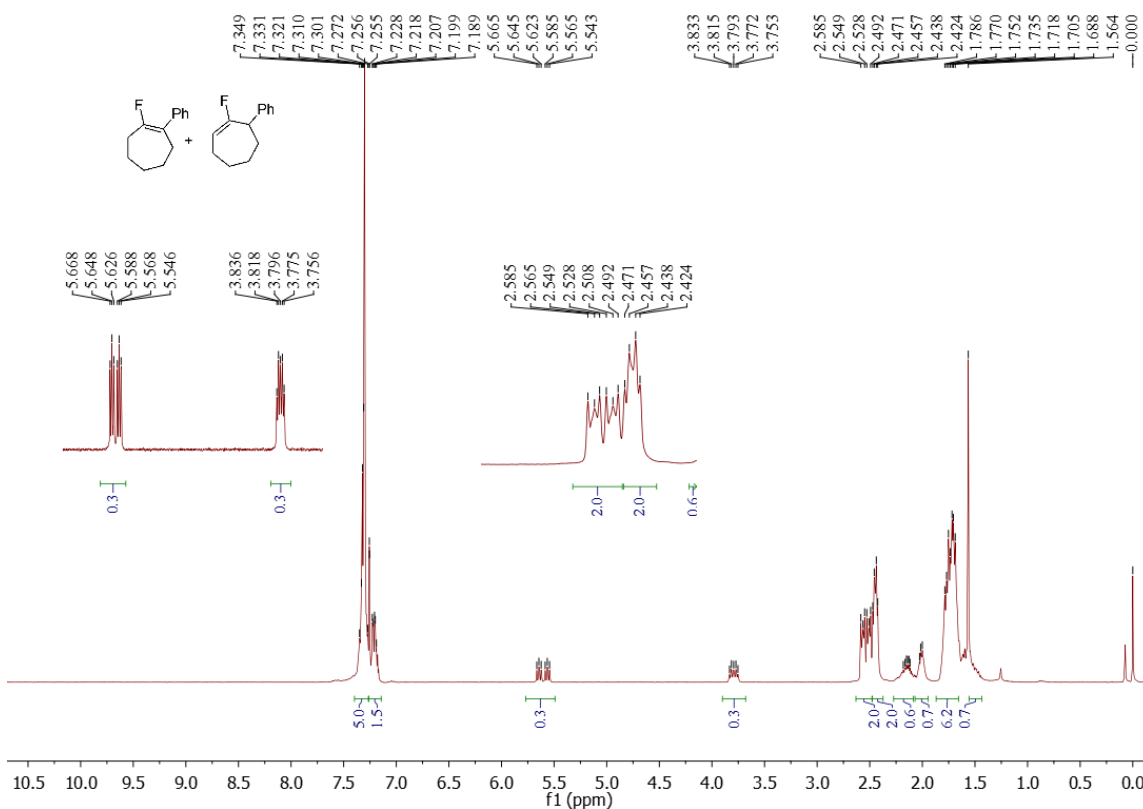

Figure S80.  $^{13}\text{C}$  NMR spectrum of **3ff**, related to Figure 2

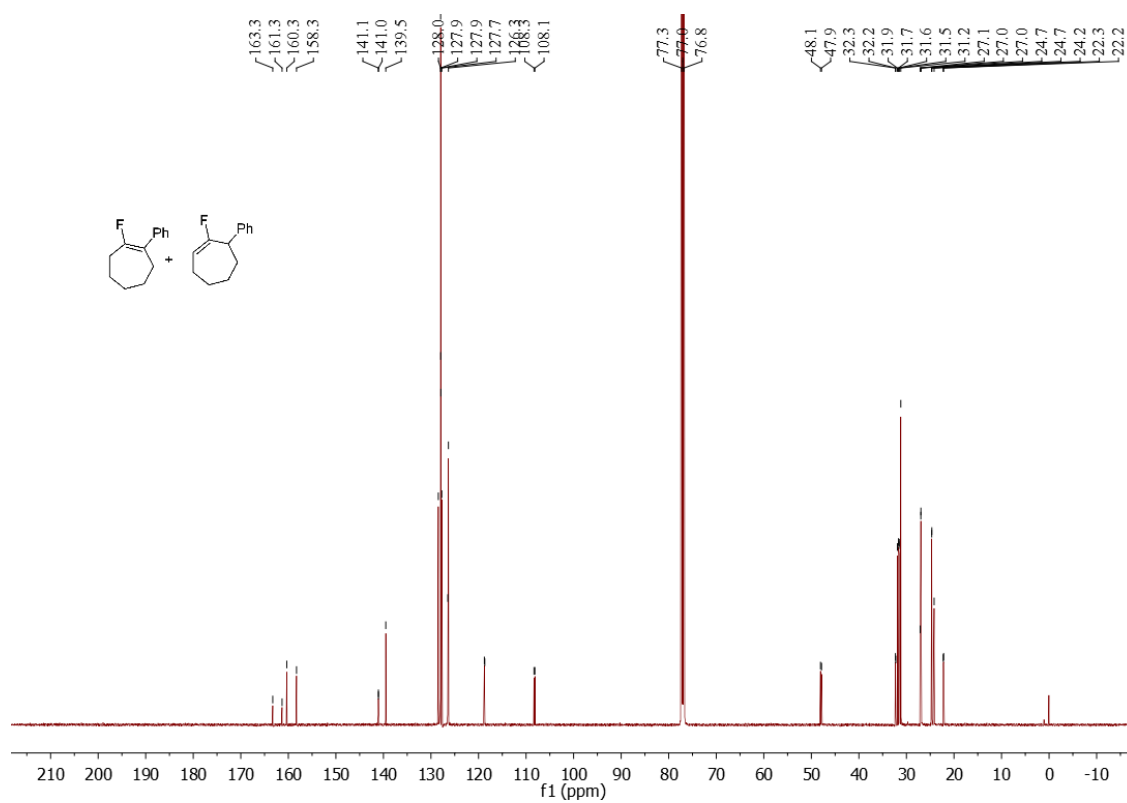

Figure S81.  $^{19}\text{F}$  NMR spectrum of **3ff**, related to Figure 2

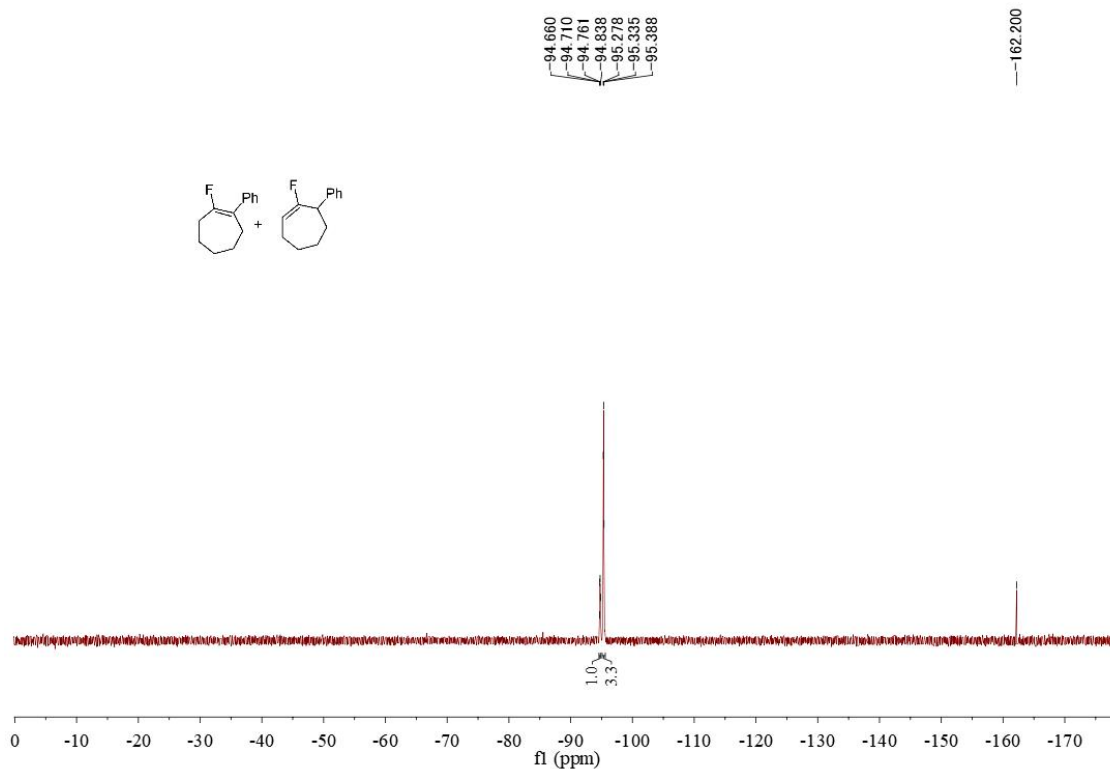

Figure S82. <sup>1</sup>H NMR spectrum of **3gg**, related to Figure 2

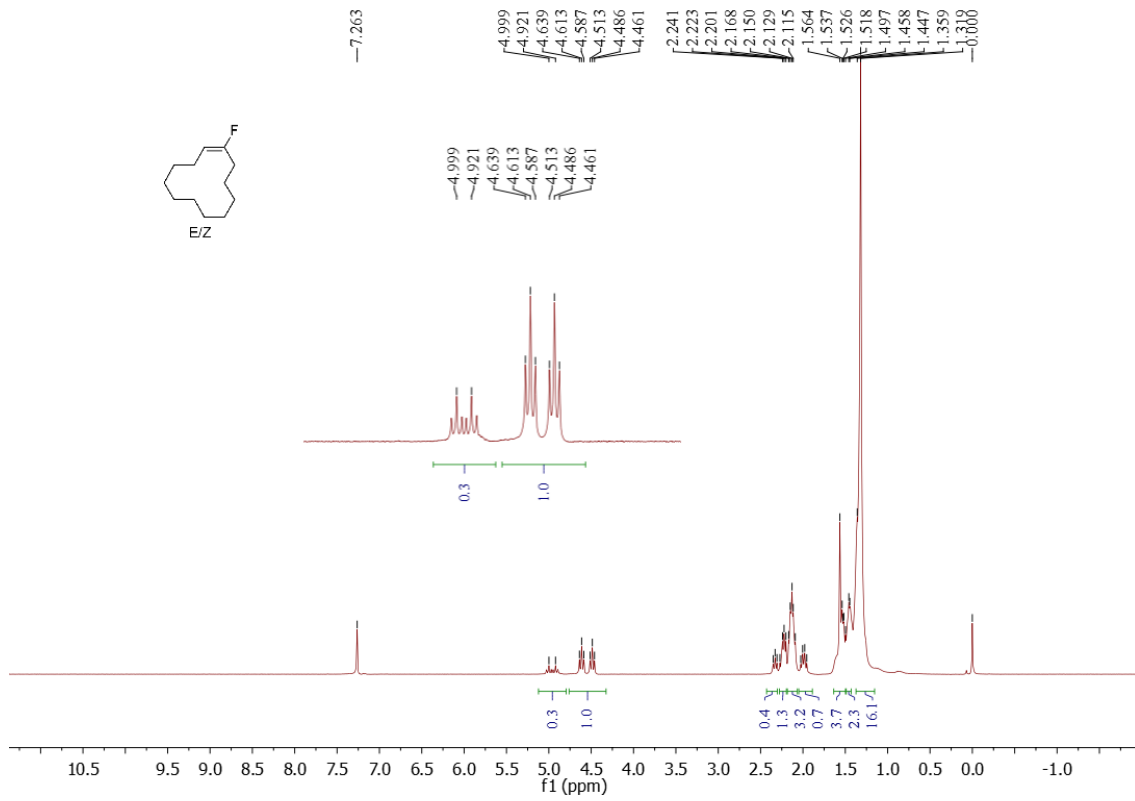

Figure S83. <sup>13</sup>C NMR spectrum of **3gg**, related to Figure 2

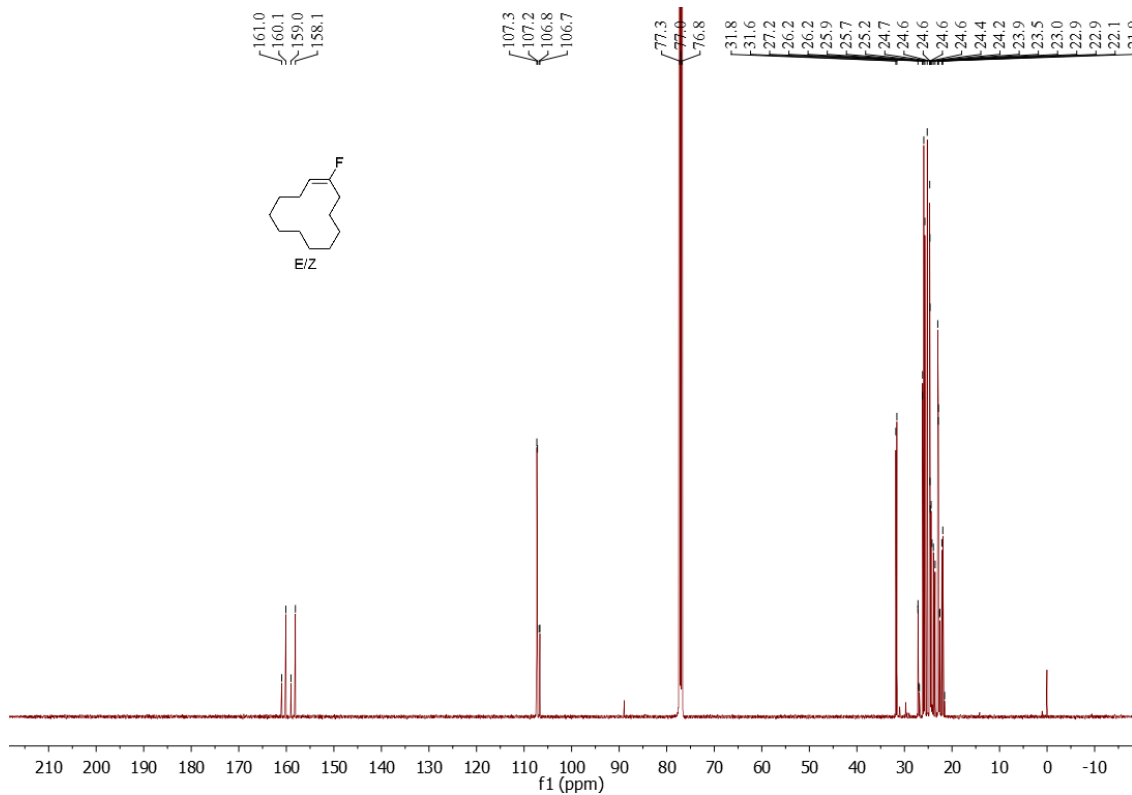

Figure S84.  $^{19}\text{F}$  NMR spectrum of **3gg**, related to Figure 2

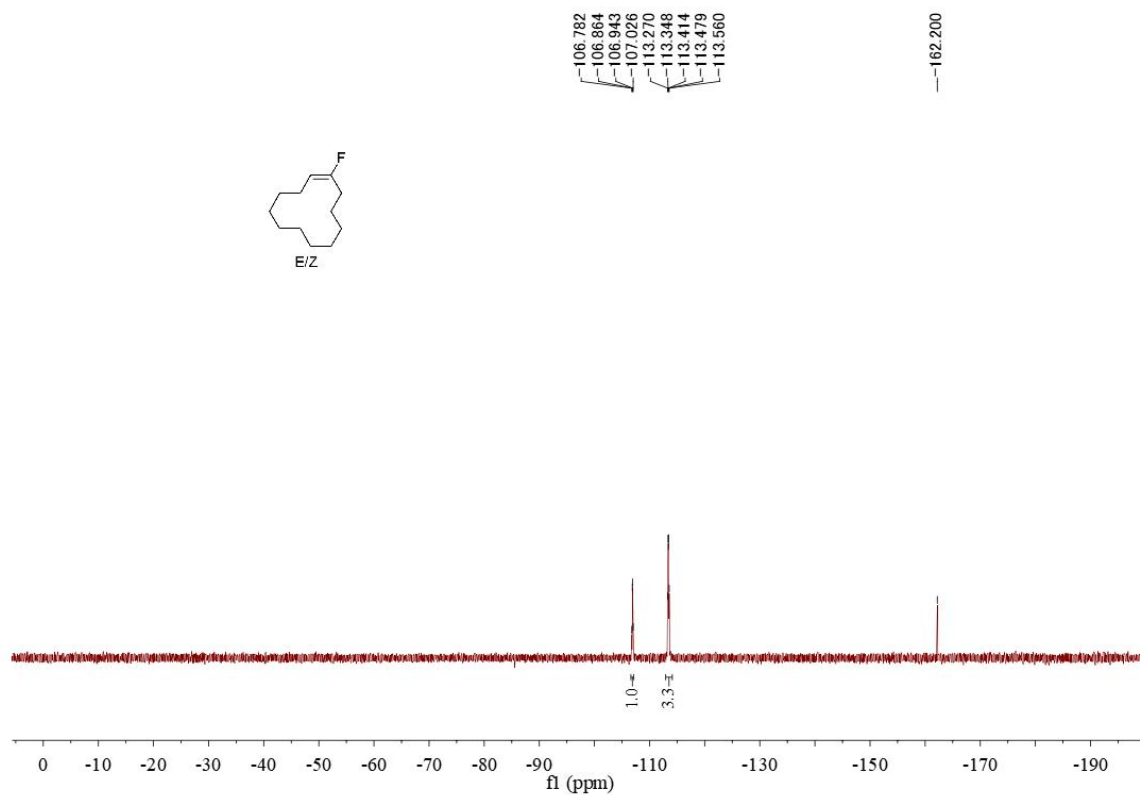

Figure S85.  $^1\text{H}$  NMR spectrum of (*Z*)-**3hh**, related to Figure 2

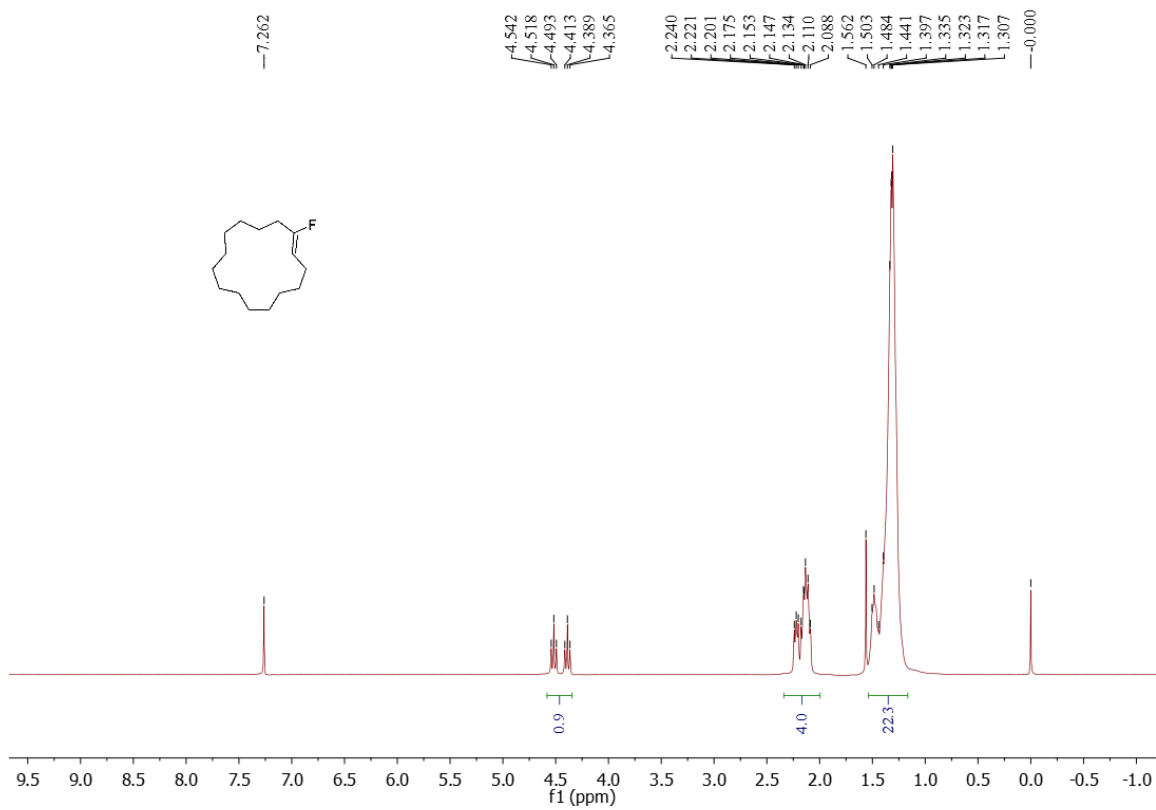

Figure S86.  $^{13}\text{C}$  NMR spectrum of (*Z*)-3hh, related to Figure 2

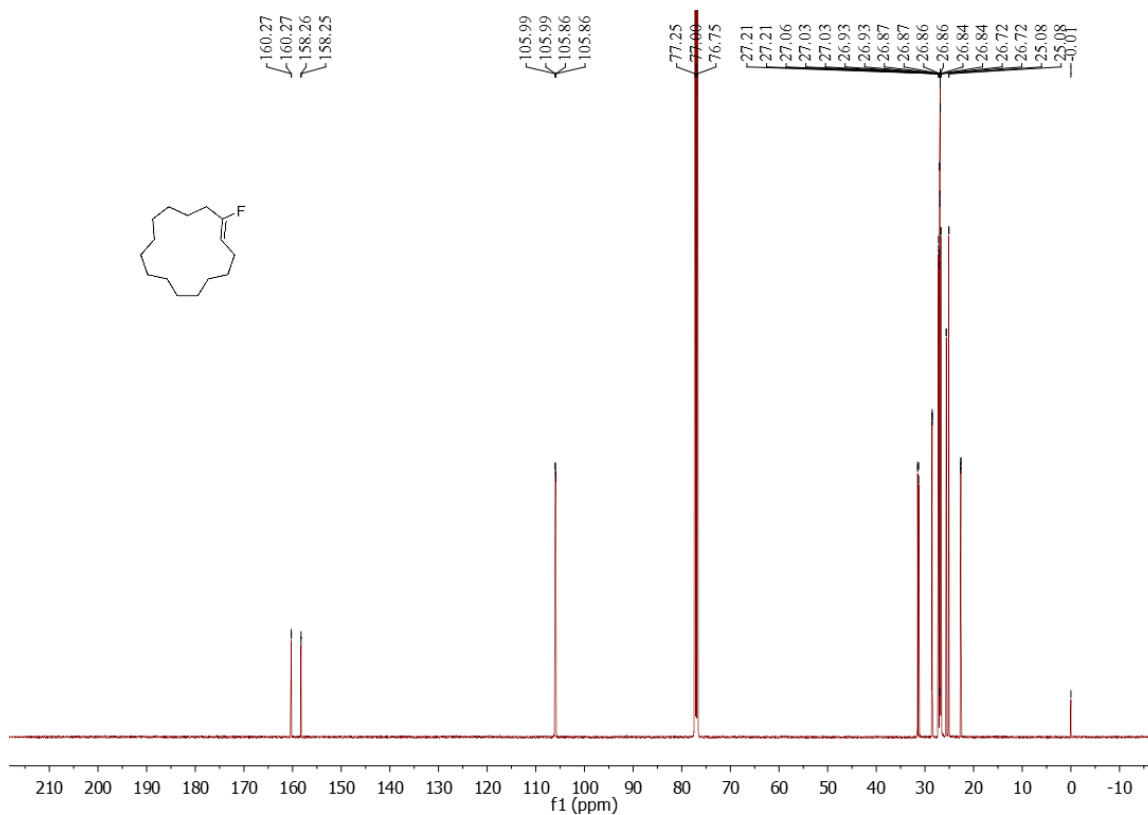

Figure S87.  $^{19}\text{F}$  NMR spectrum of (*Z*)-3hh, related to Figure 2

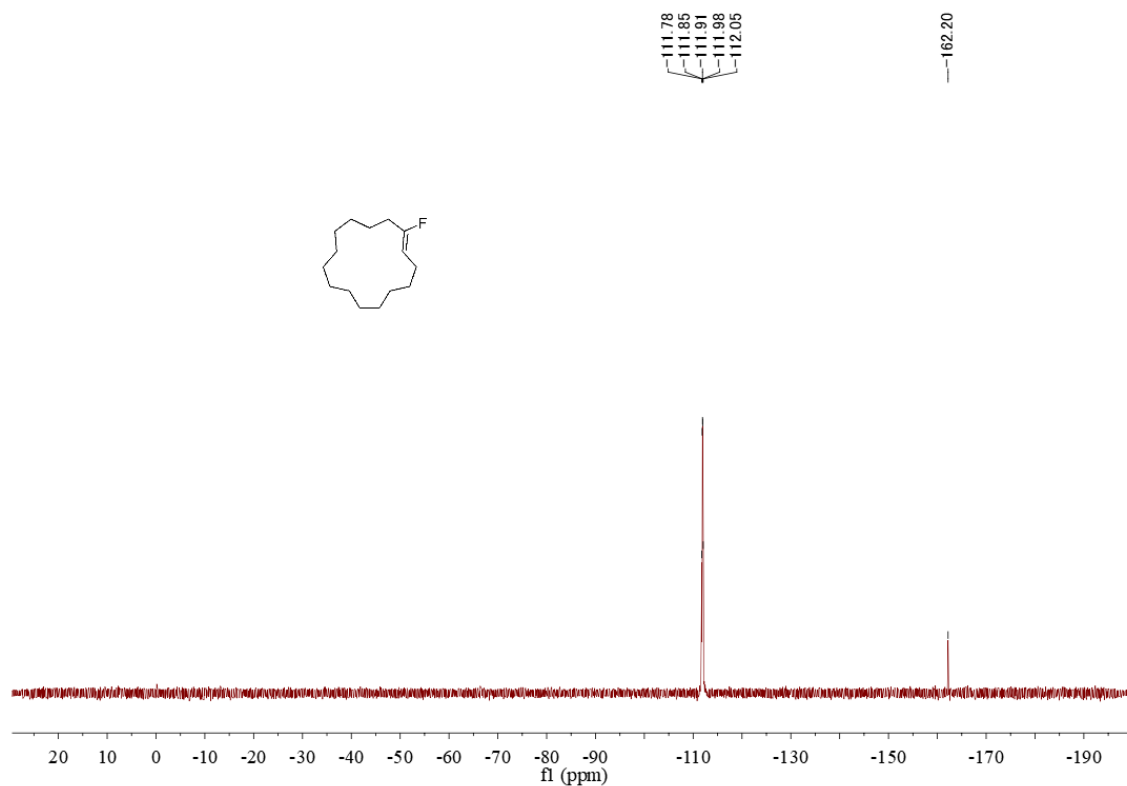

Figure S88.  $^{19}\text{F}$  NMR spectrum of **3hh**, related to Figure 2

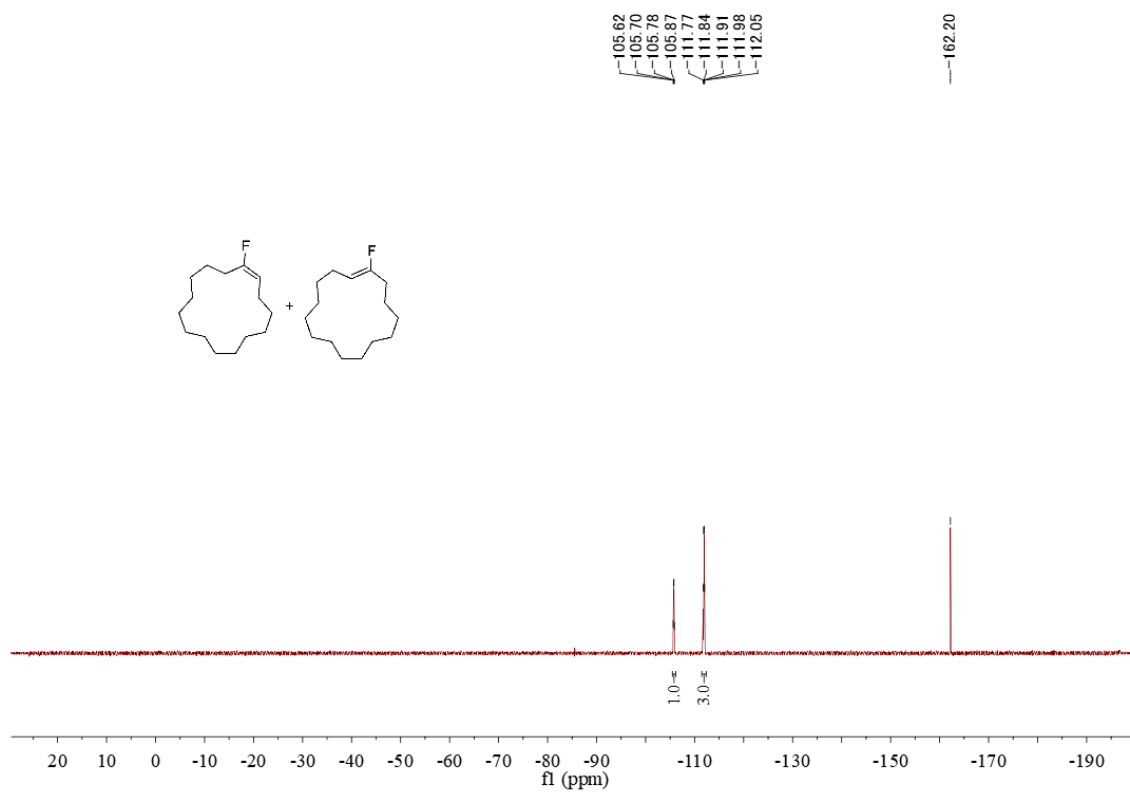

Figure S89. <sup>1</sup>H NMR spectrum of **5a**, related to Figure 3

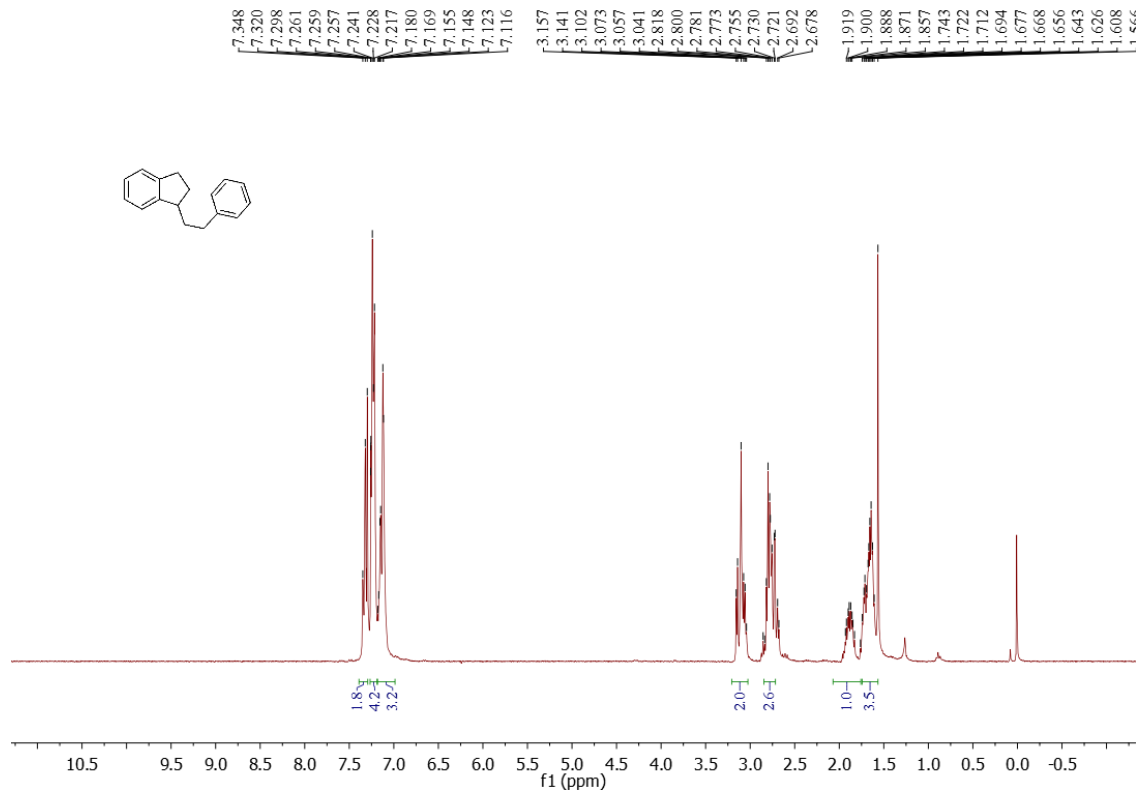

Figure S90. <sup>13</sup>C NMR spectrum of **5a**, related to Figure 3

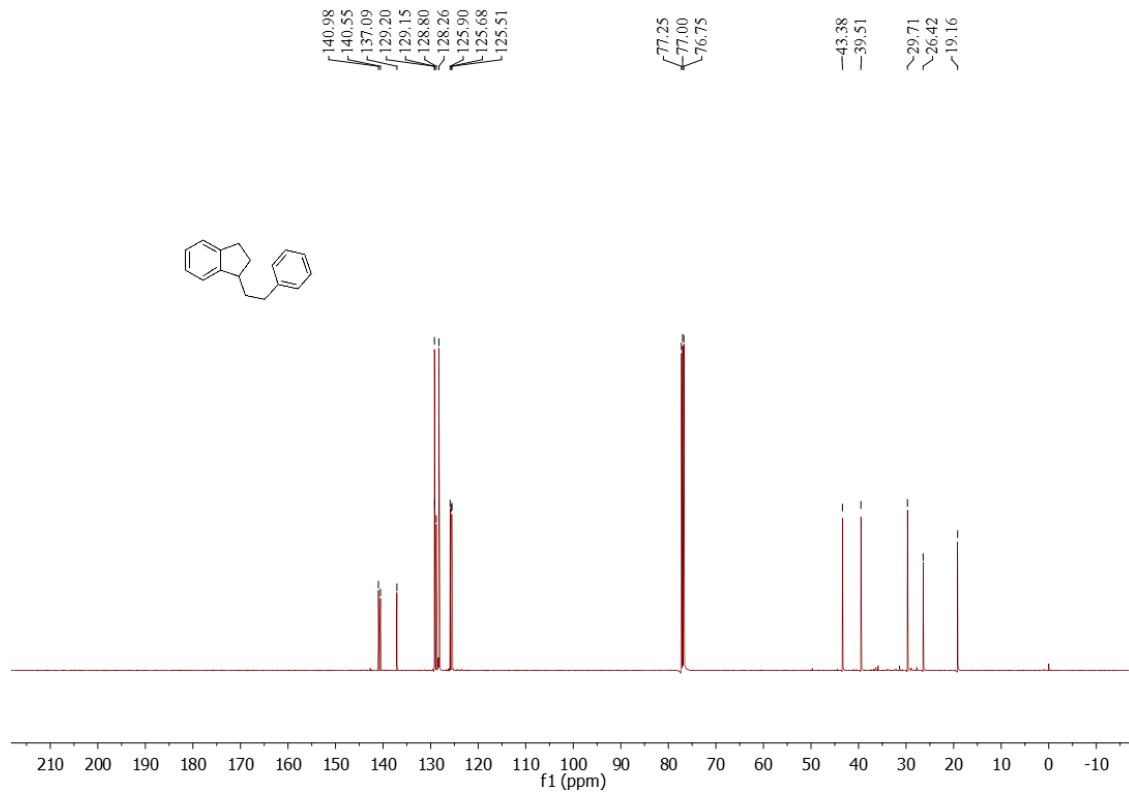

Figure S91. <sup>1</sup>H NMR spectrum of **5b**, related to Figure 3

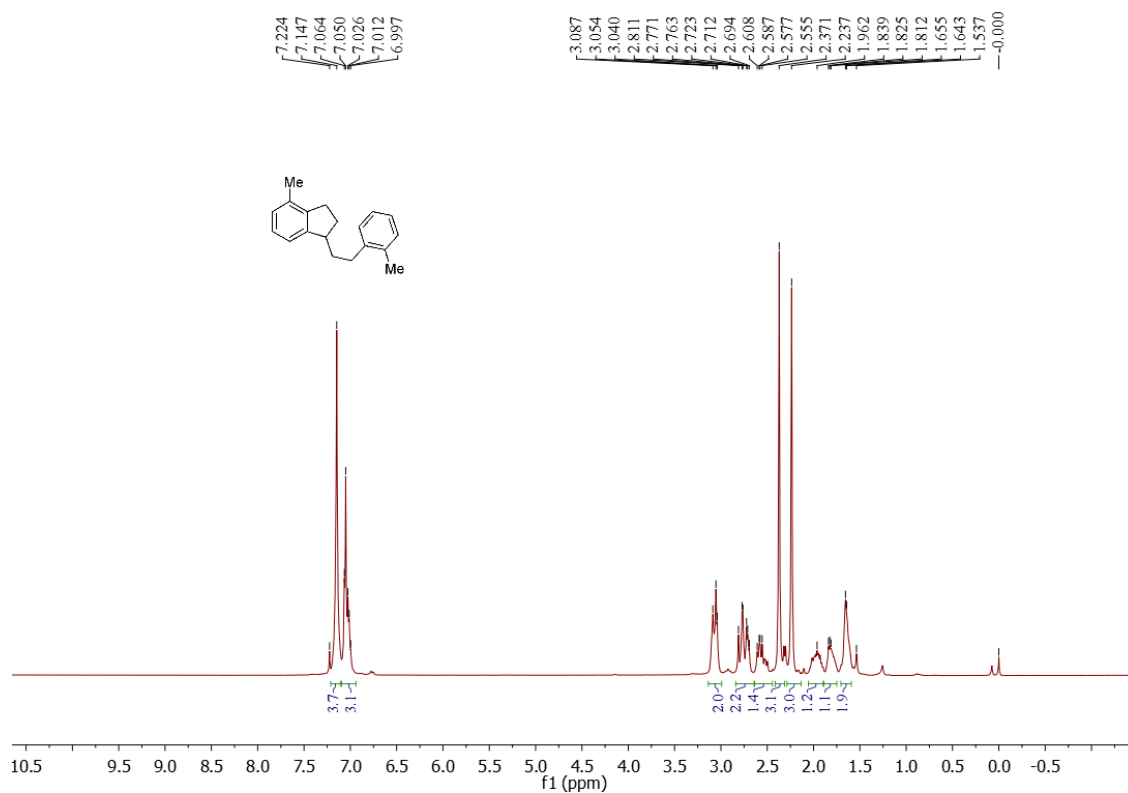

Figure S92. <sup>13</sup>C NMR spectrum of **5b**, related to Figure 3

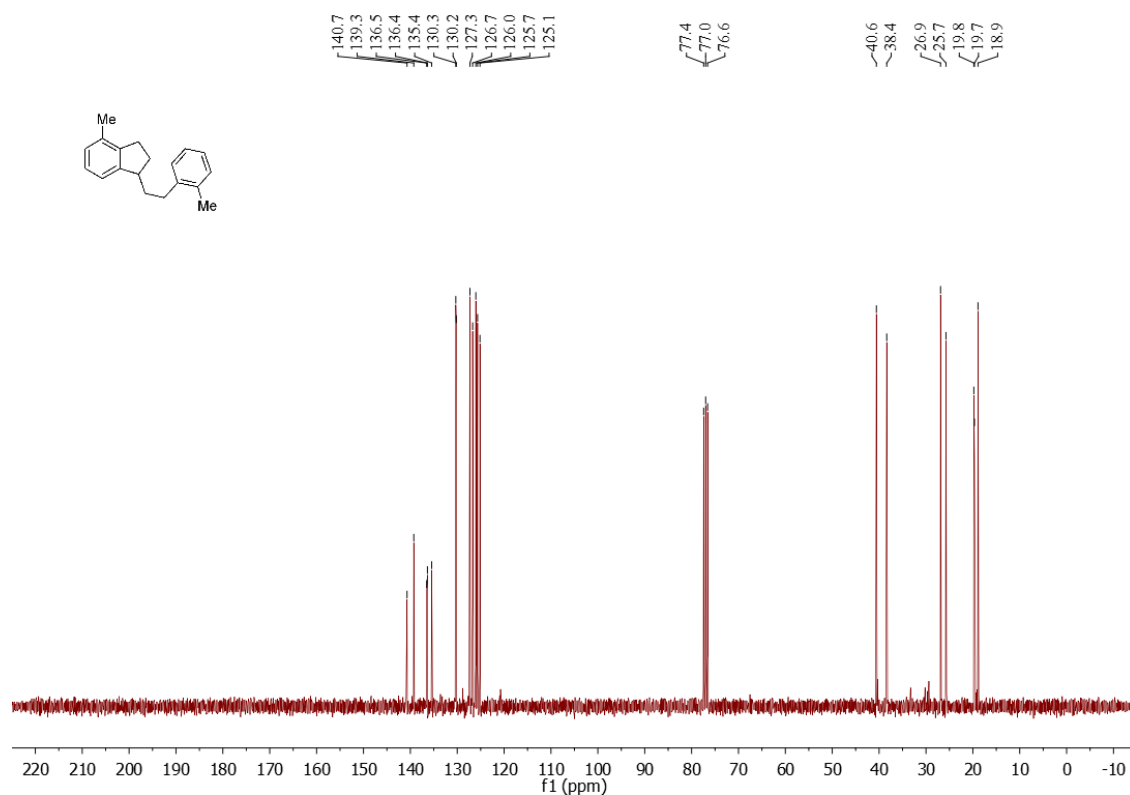



Figure S93. <sup>1</sup>H NMR spectrum of **5c**, related to Figure 3

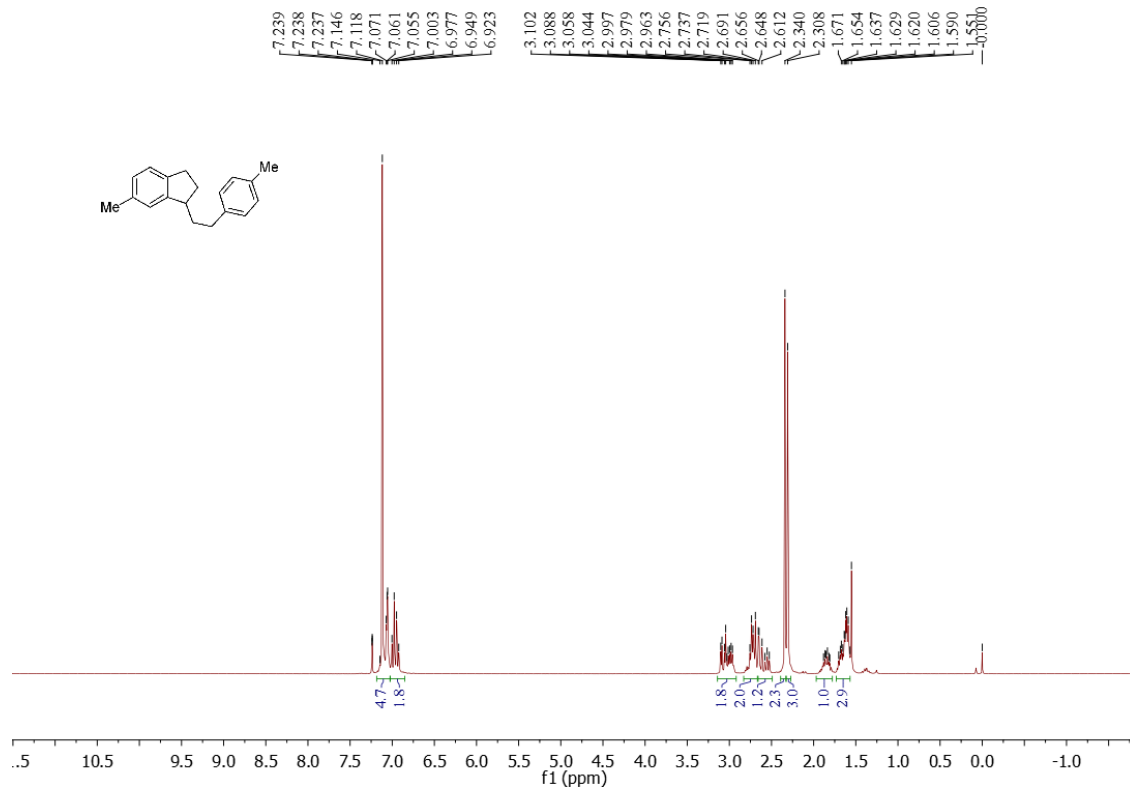

Figure S94. <sup>13</sup>C NMR spectrum of **5c**, related to Figure 3

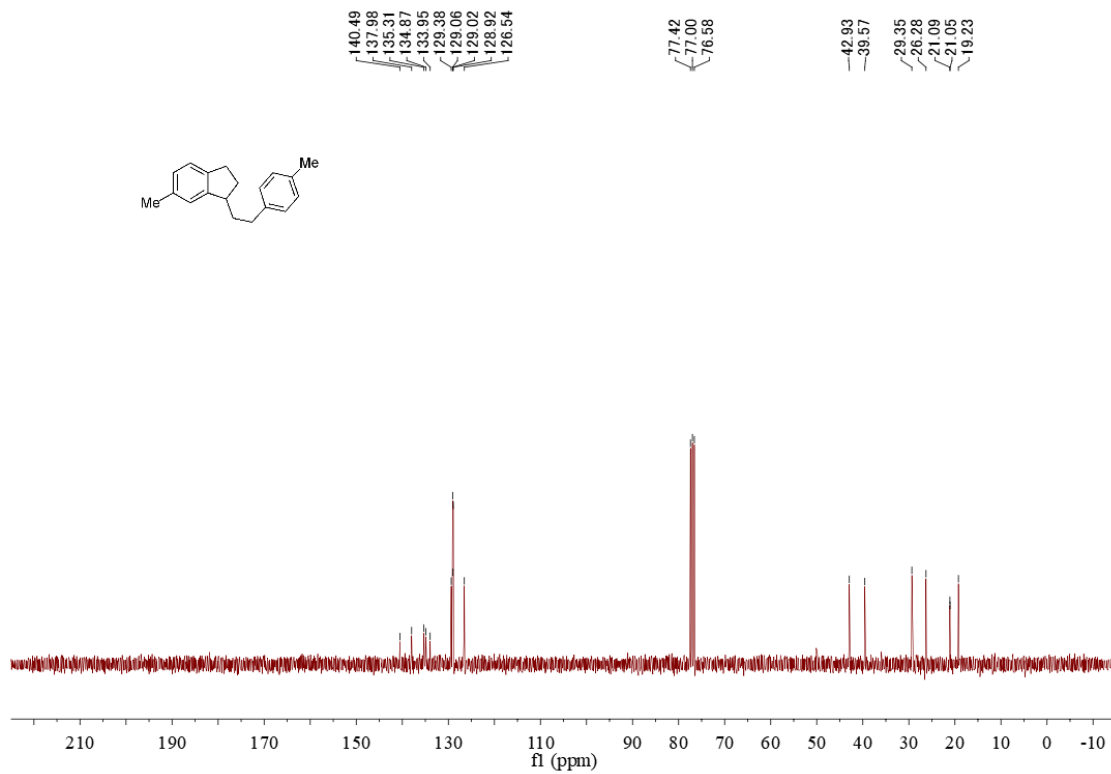

Figure S95. <sup>1</sup>H NMR spectrum of **5d**, related to Figure 3

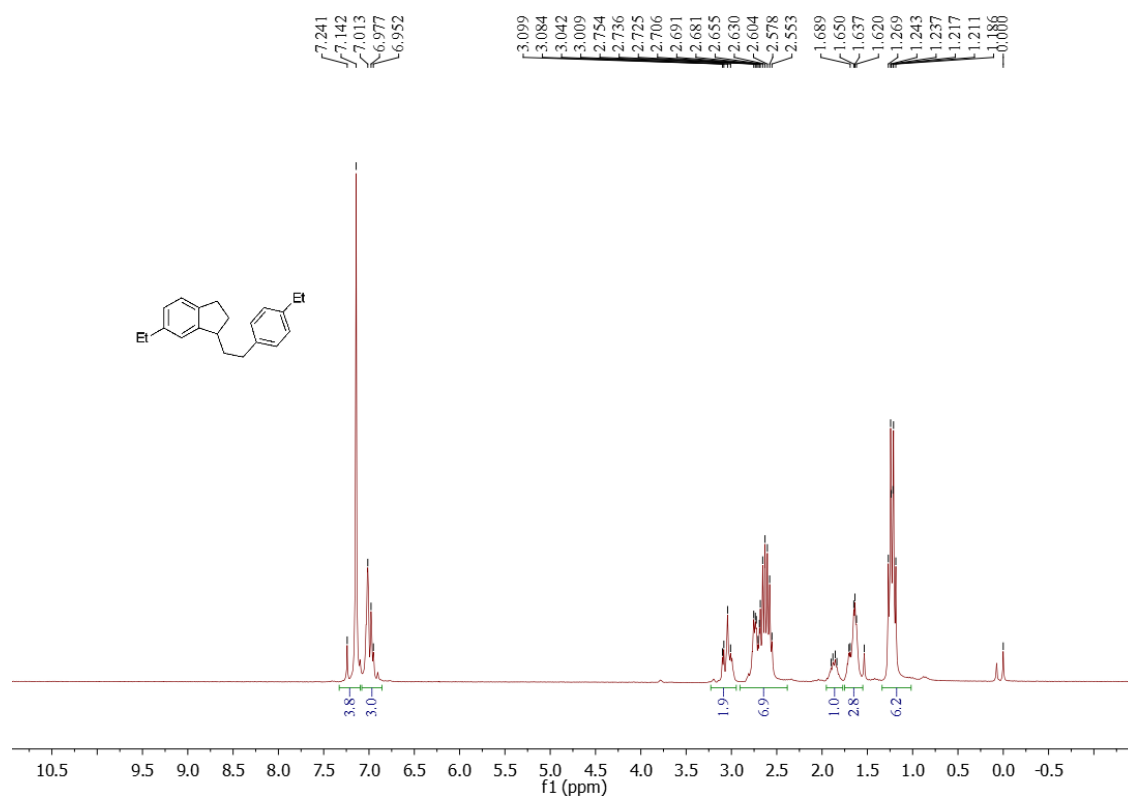

Figure S96. <sup>13</sup>C NMR spectrum of **5d**, related to Figure 3

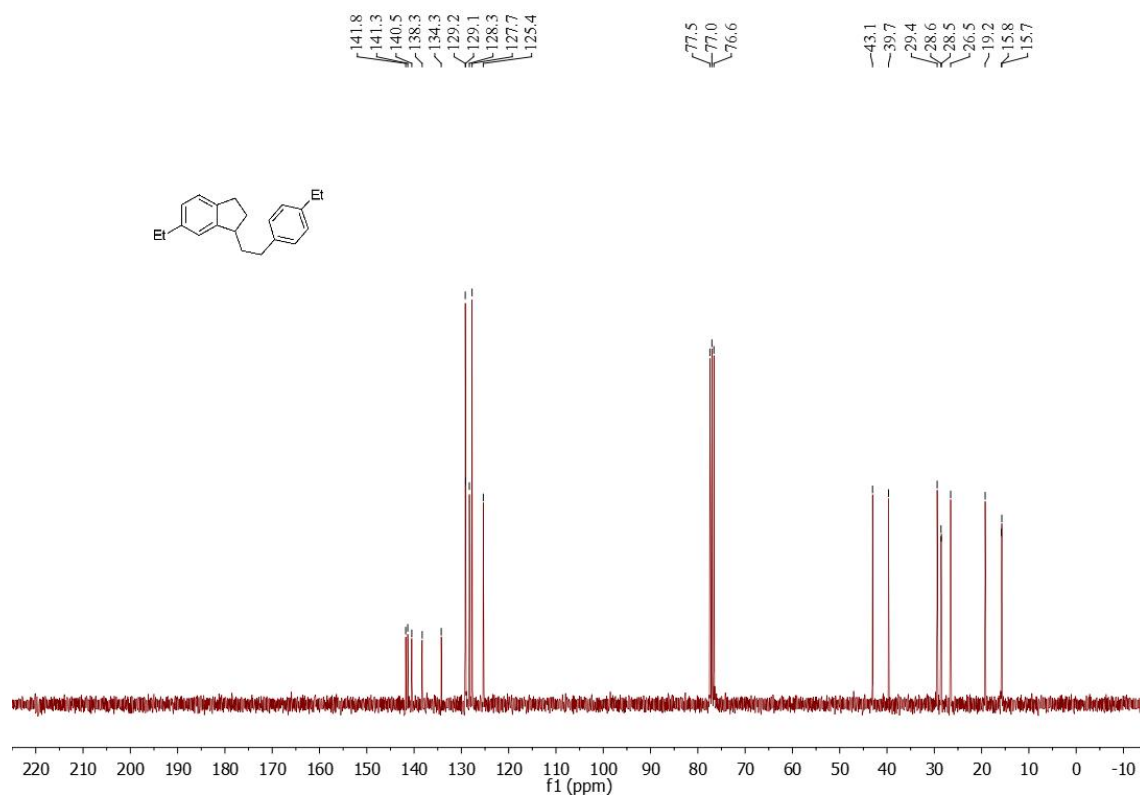

Figure S97. <sup>1</sup>H NMR spectrum of **5e**, related to Figure 3

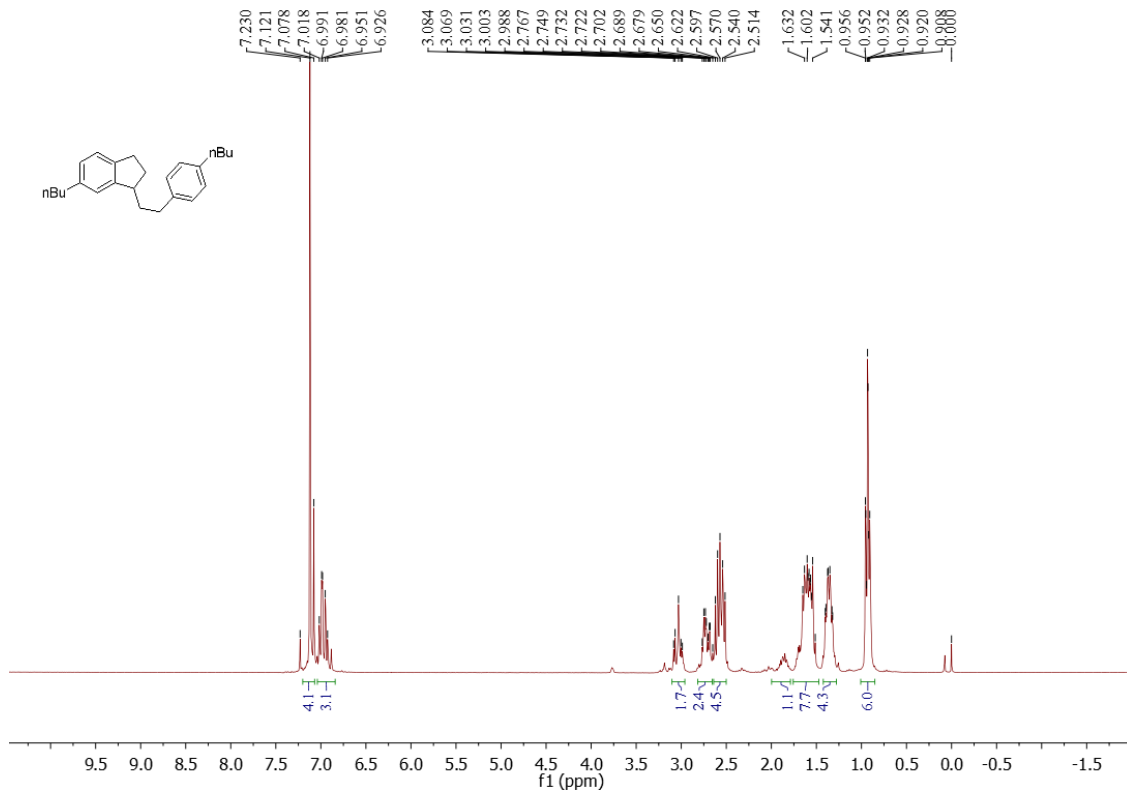

Figure S98. <sup>13</sup>C NMR spectrum of **5e**, related to Figure 3

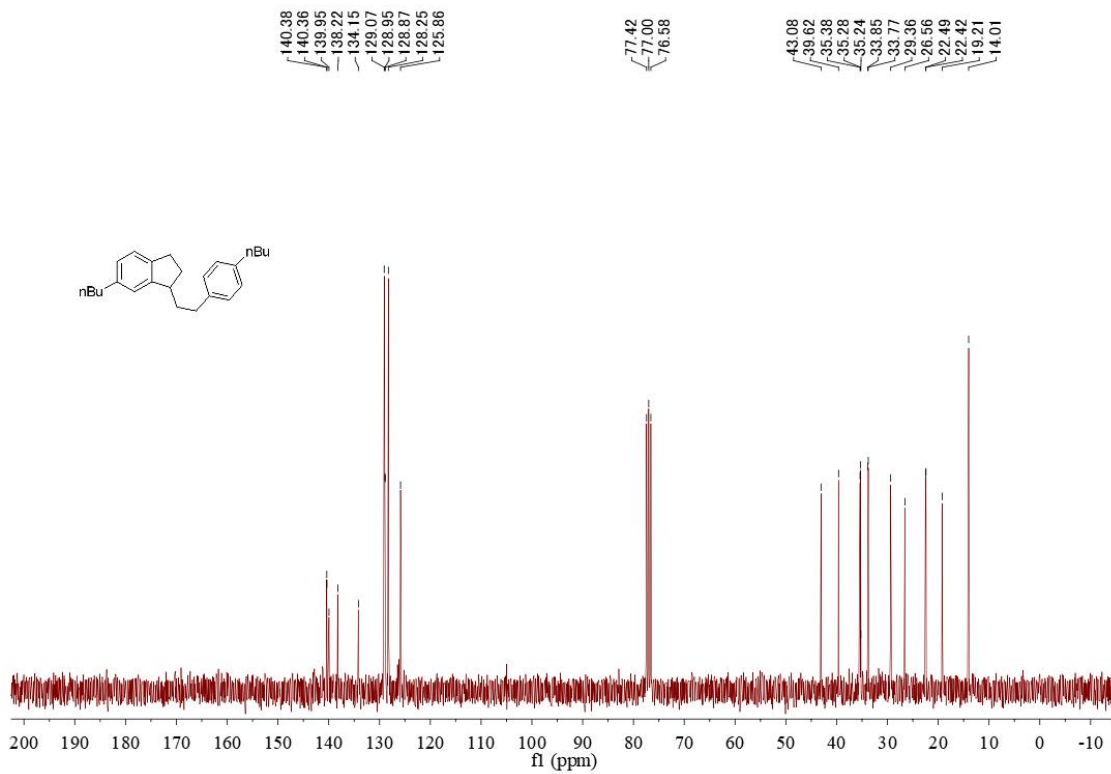

Figure S99. <sup>1</sup>H NMR spectrum of **5f**, related to Figure 3

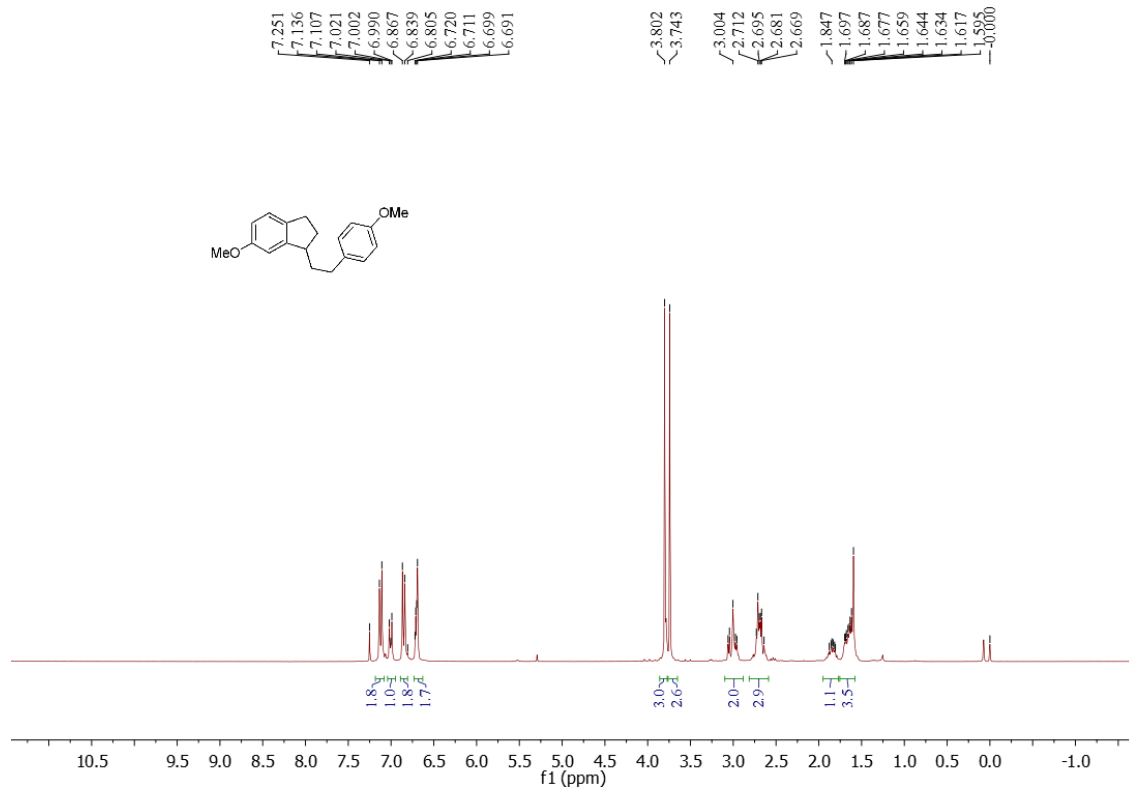

Figure S100. <sup>13</sup>C NMR spectrum of **5f**, related to Figure 3

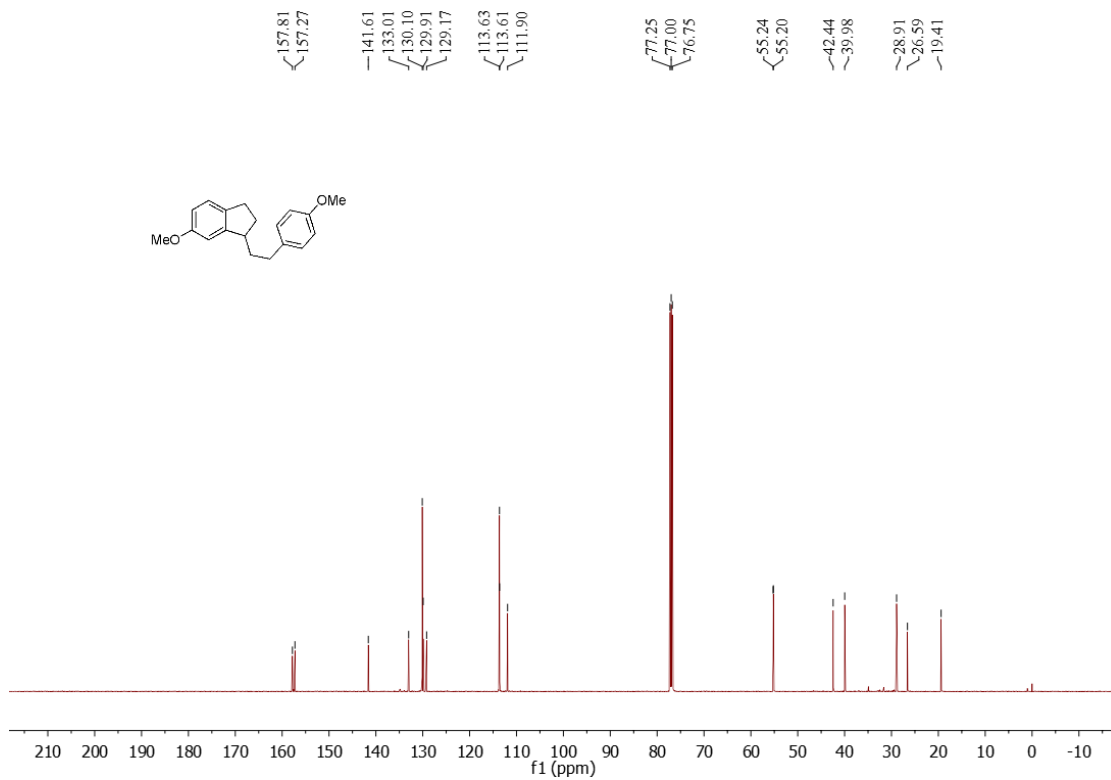

Figure S101. <sup>1</sup>H NMR spectrum of **5g**, related to Figure 3

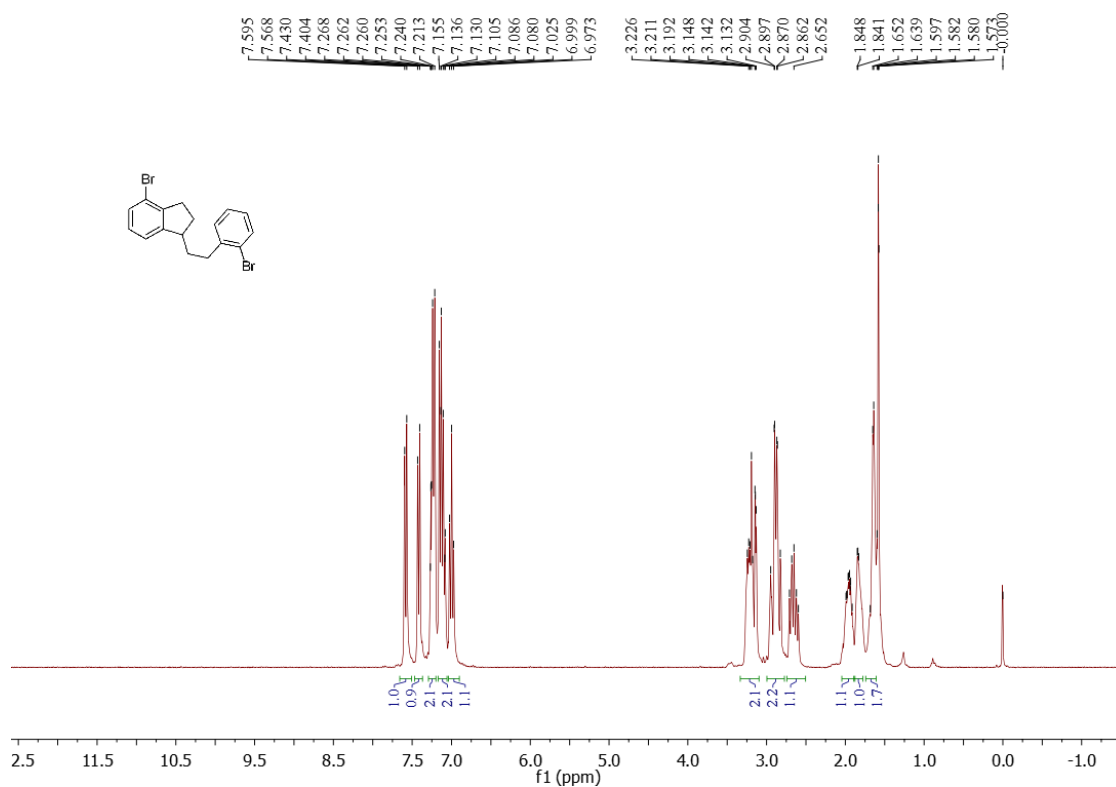

Figure S102. <sup>13</sup>C NMR spectrum of **5g**, related to Figure 3

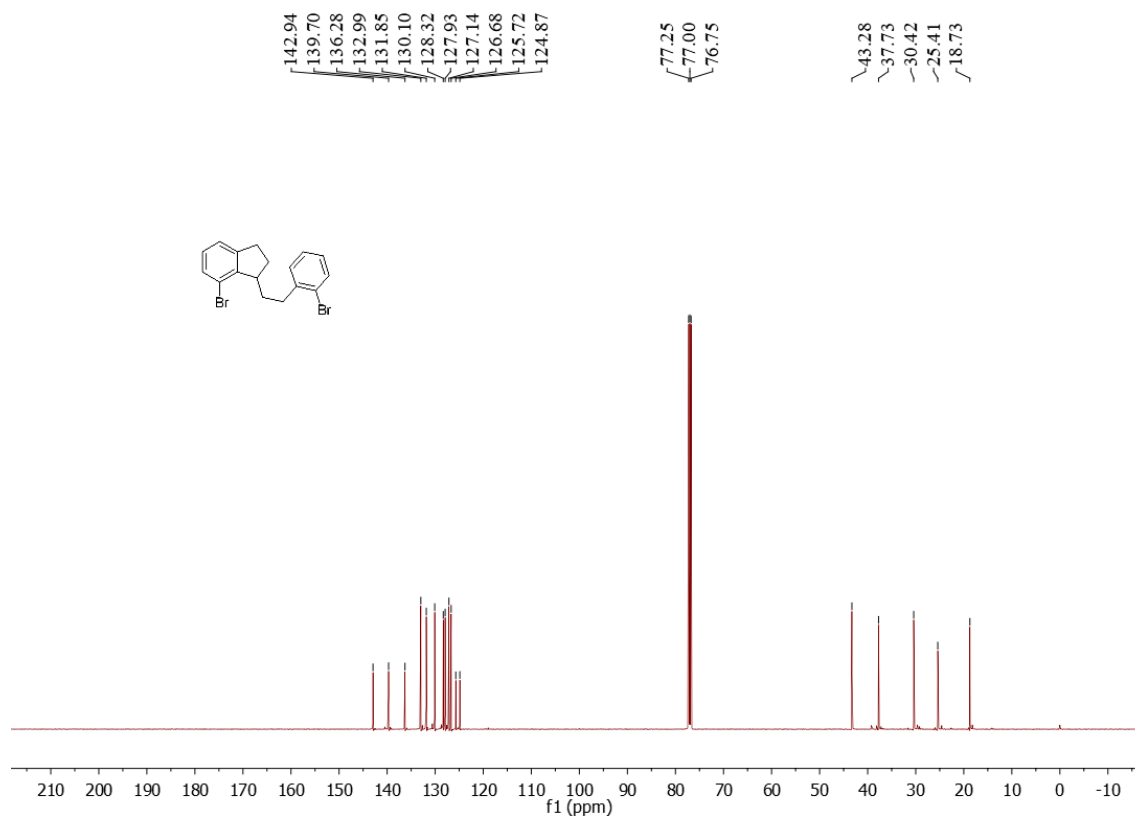

Figure S103. <sup>1</sup>H NMR spectrum of 5h, related to Figure 3

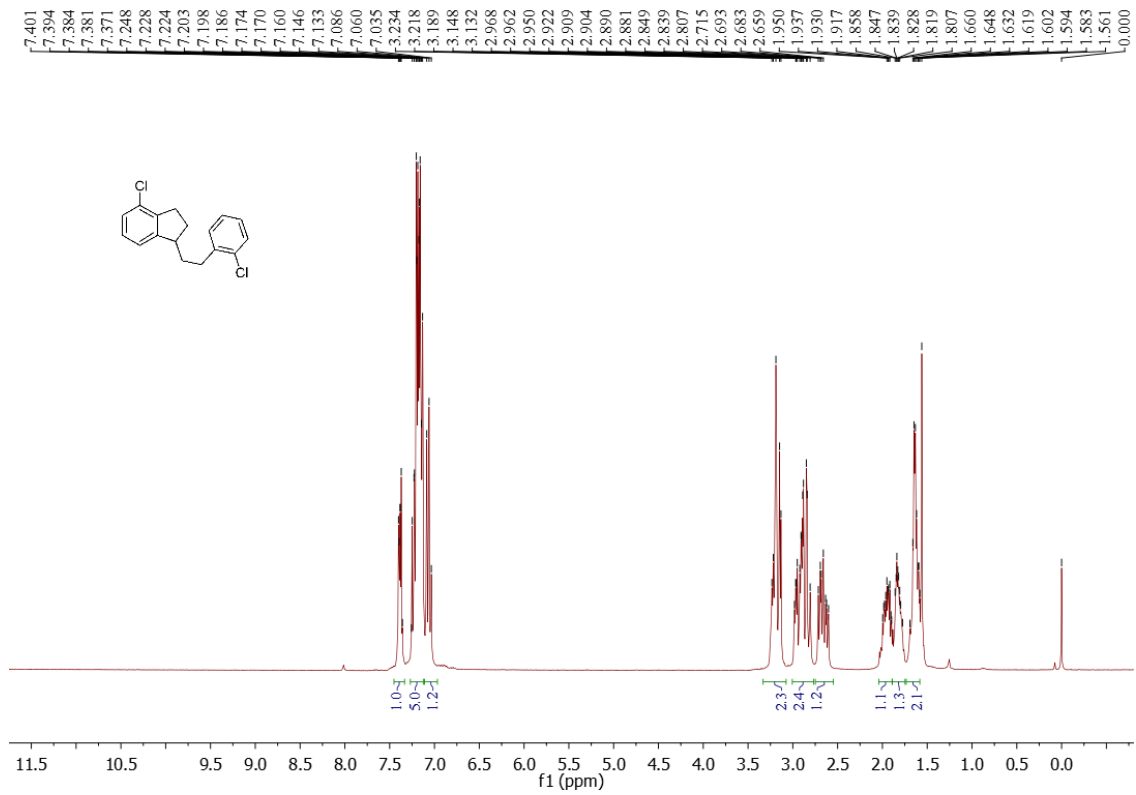

Figure S104. <sup>13</sup>C NMR spectrum of 5h, related to Figure 3

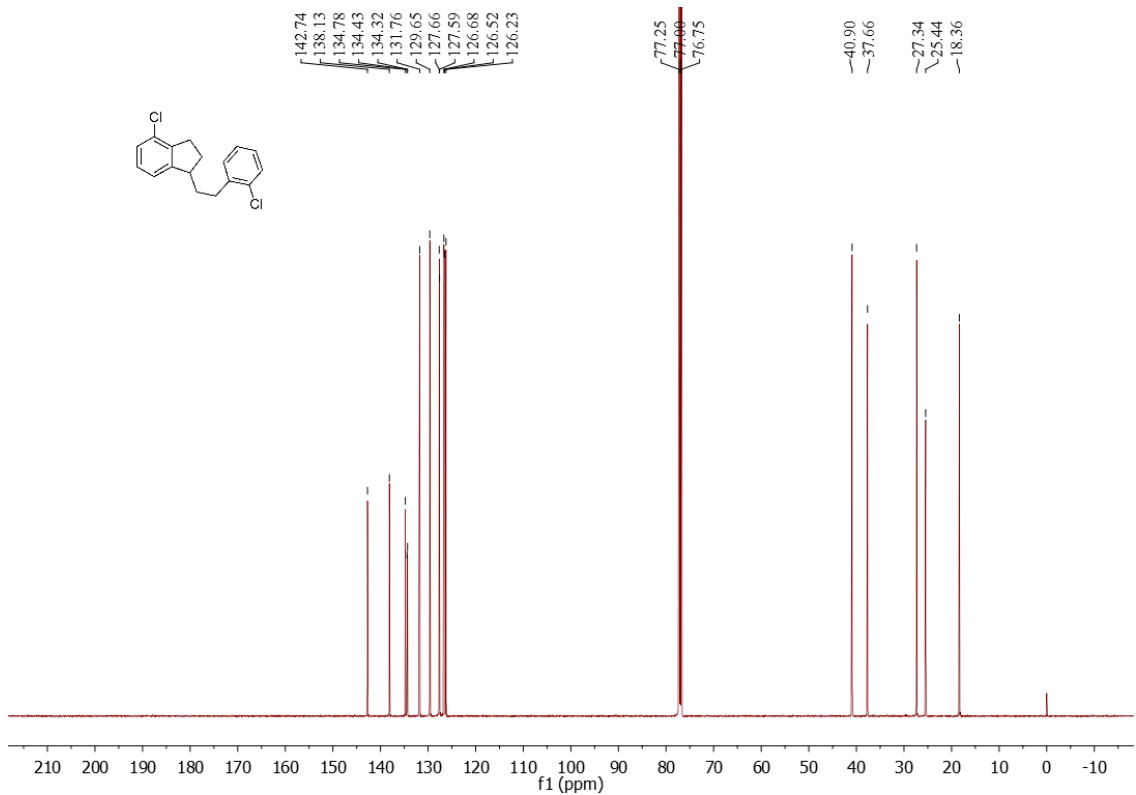

Figure S105. <sup>1</sup>H NMR spectrum of **5i**, related to Figure 3

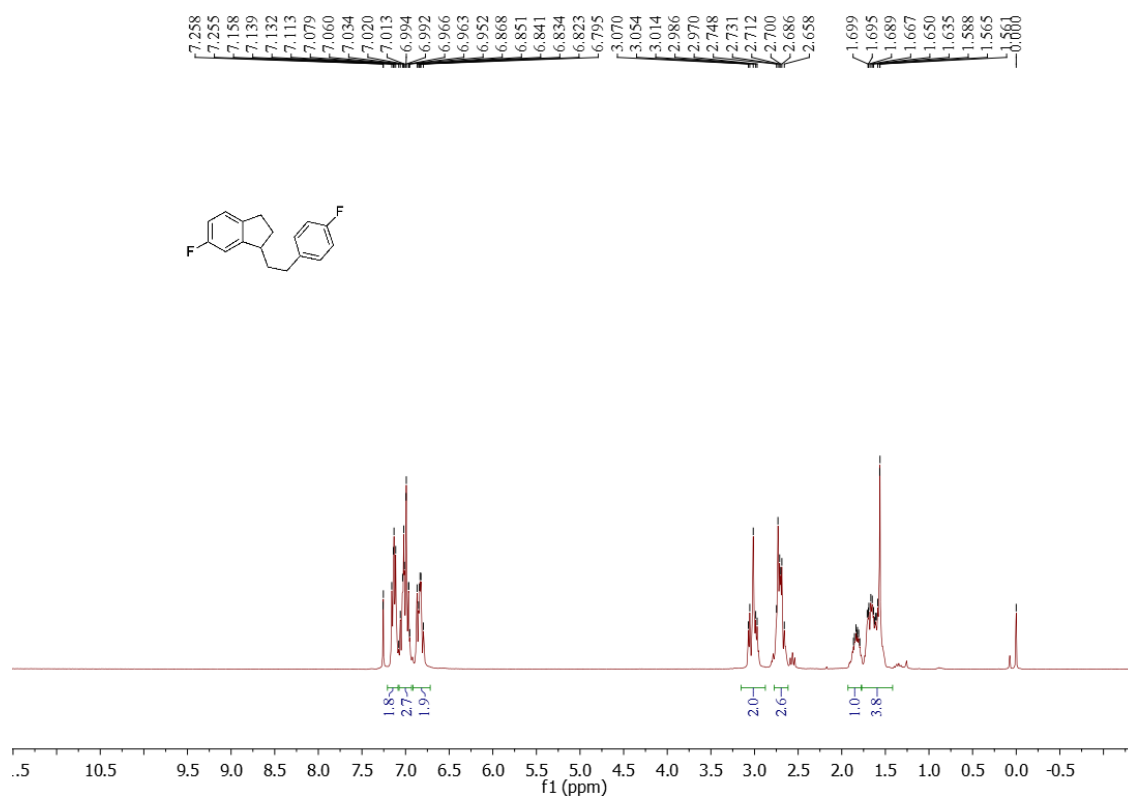

Figure S106. <sup>13</sup>C NMR spectrum of **5i**, related to Figure 3

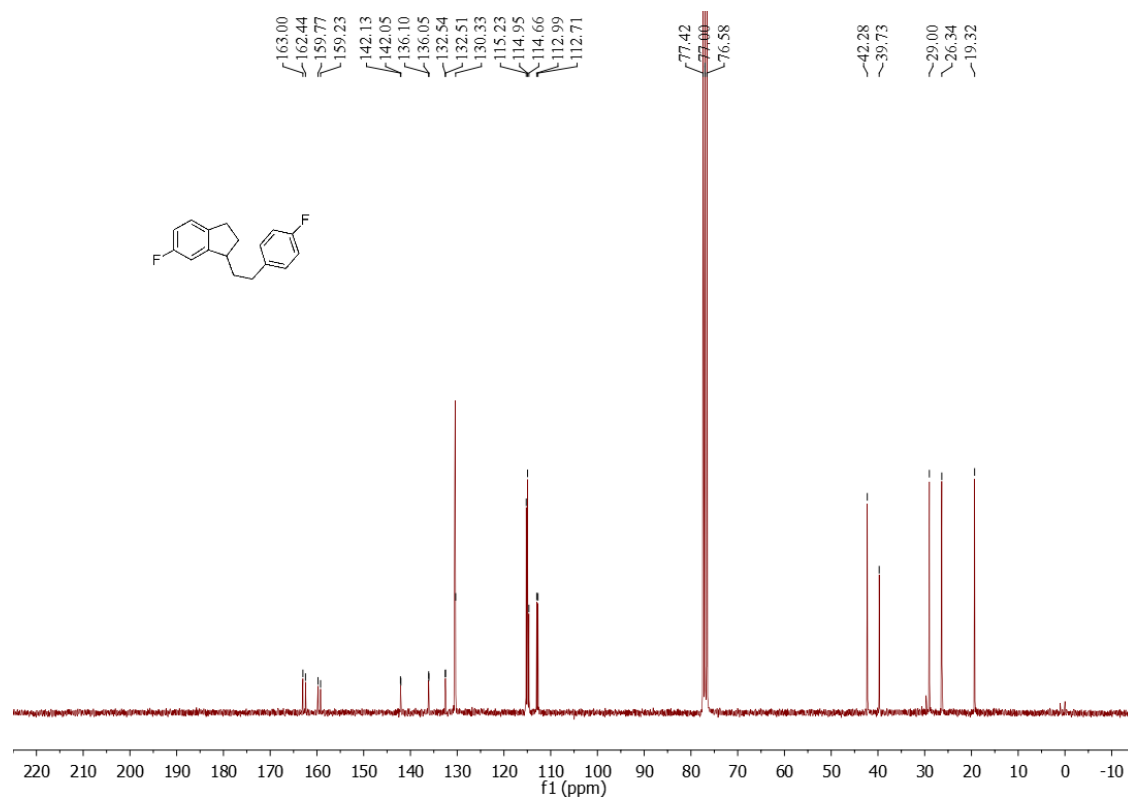

Figure S107. <sup>1</sup>H NMR spectrum of **5j**, related to Figure 3

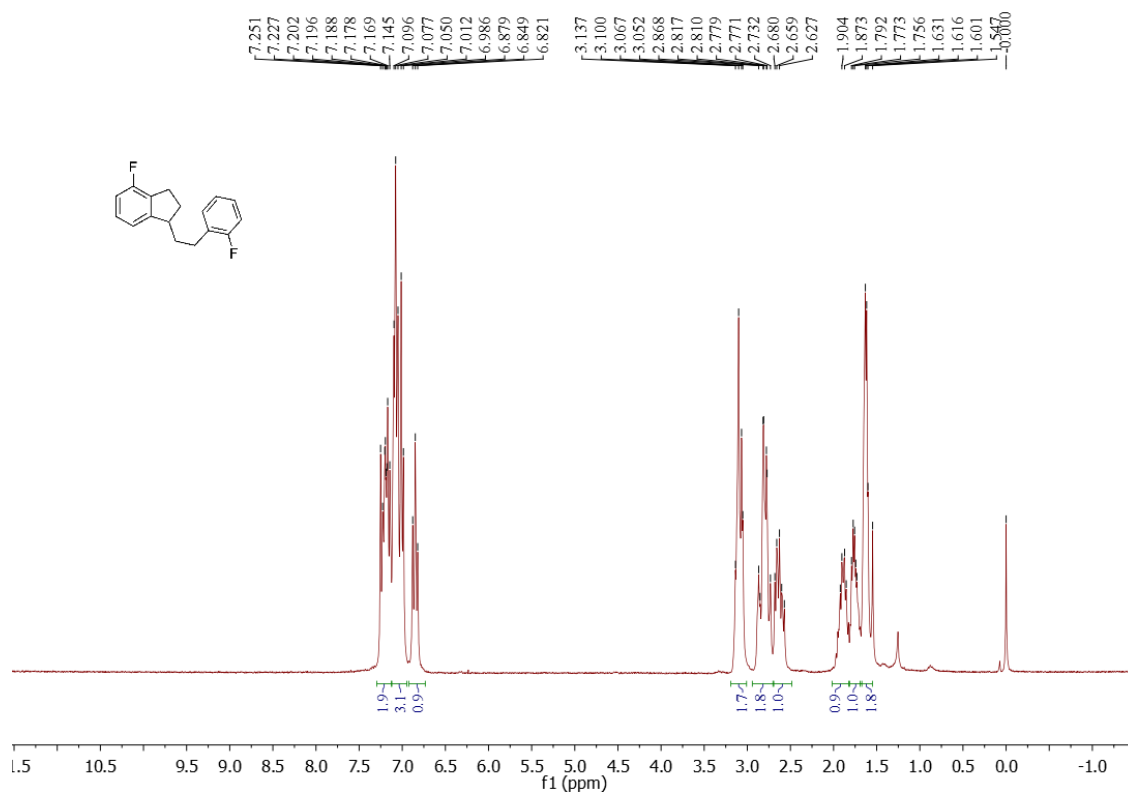

Figure S108. <sup>13</sup>C NMR spectrum of **5j**, related to Figure 3

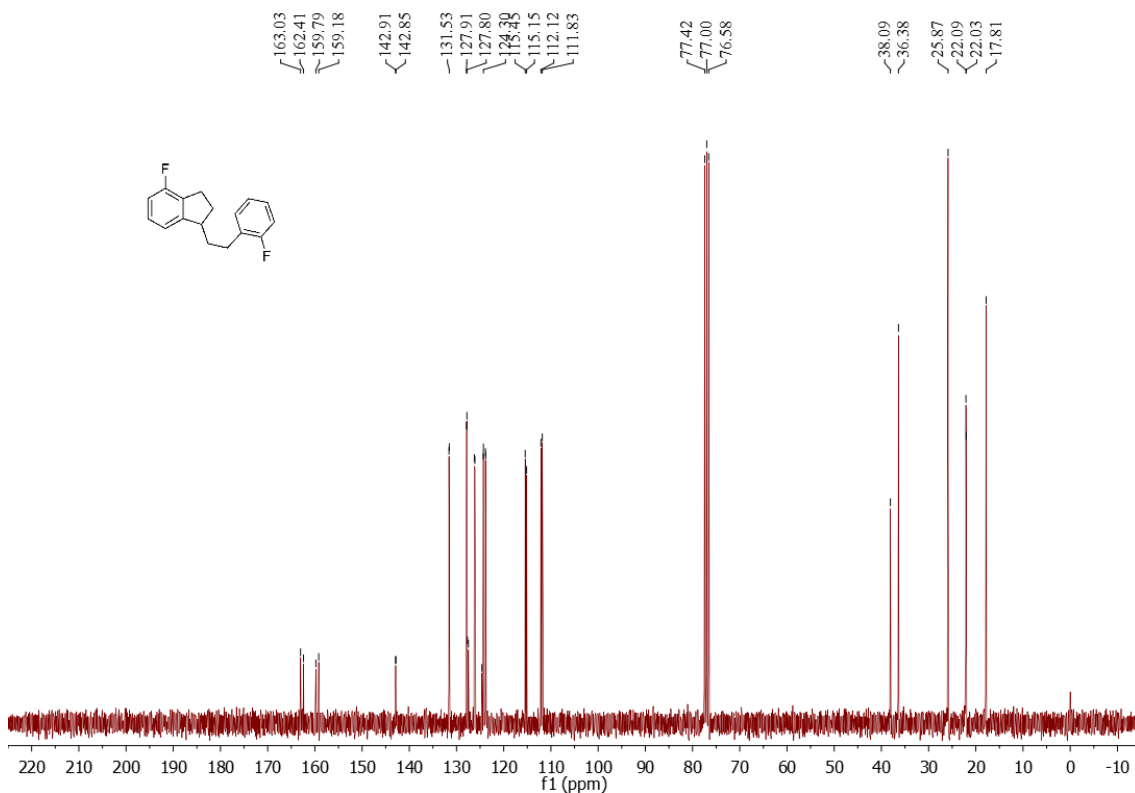



Figure S109. <sup>1</sup>H NMR spectrum of **5k**, related to **Figure 3**

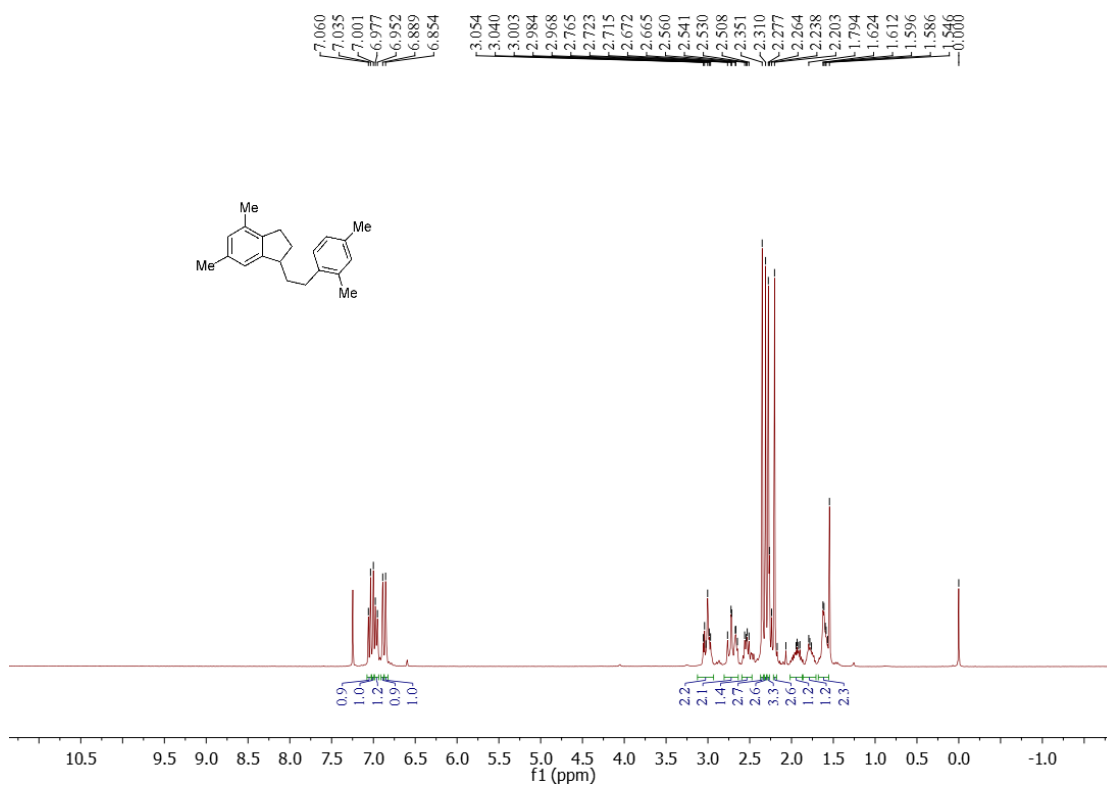

Figure S110. <sup>13</sup>C NMR spectrum of **5k**, related to **Figure 3**

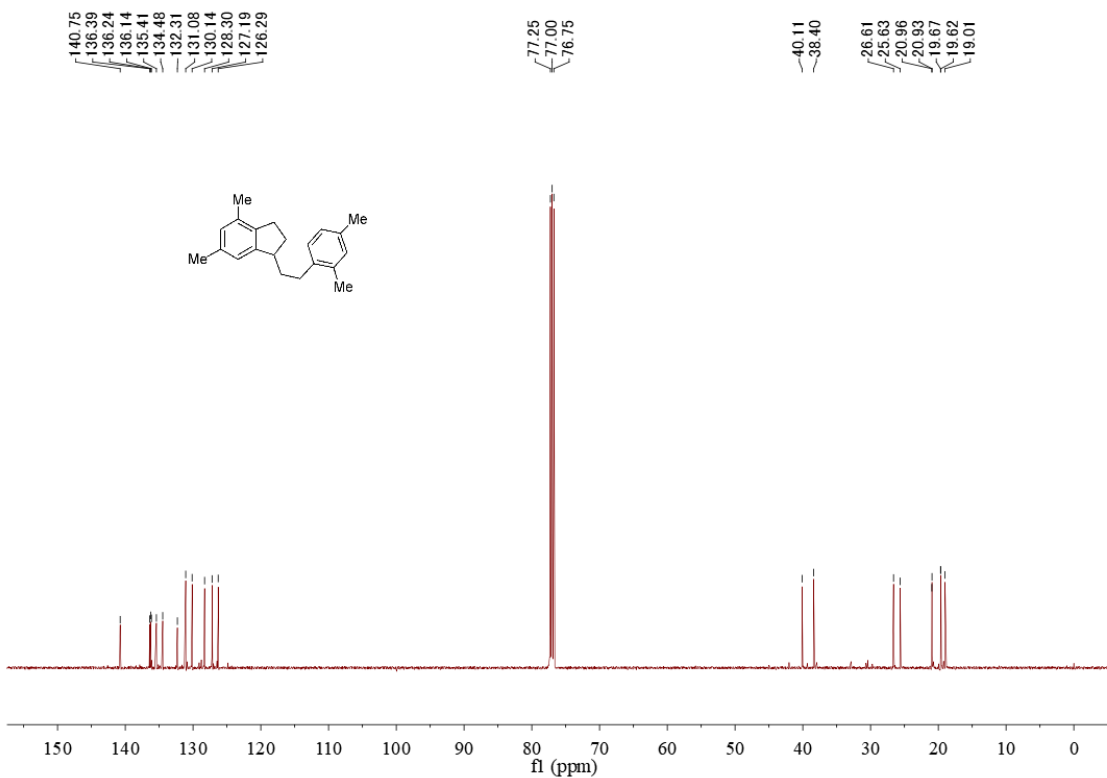

Figure S111. <sup>1</sup>H NMR spectrum of **5I**, related to Figure 3

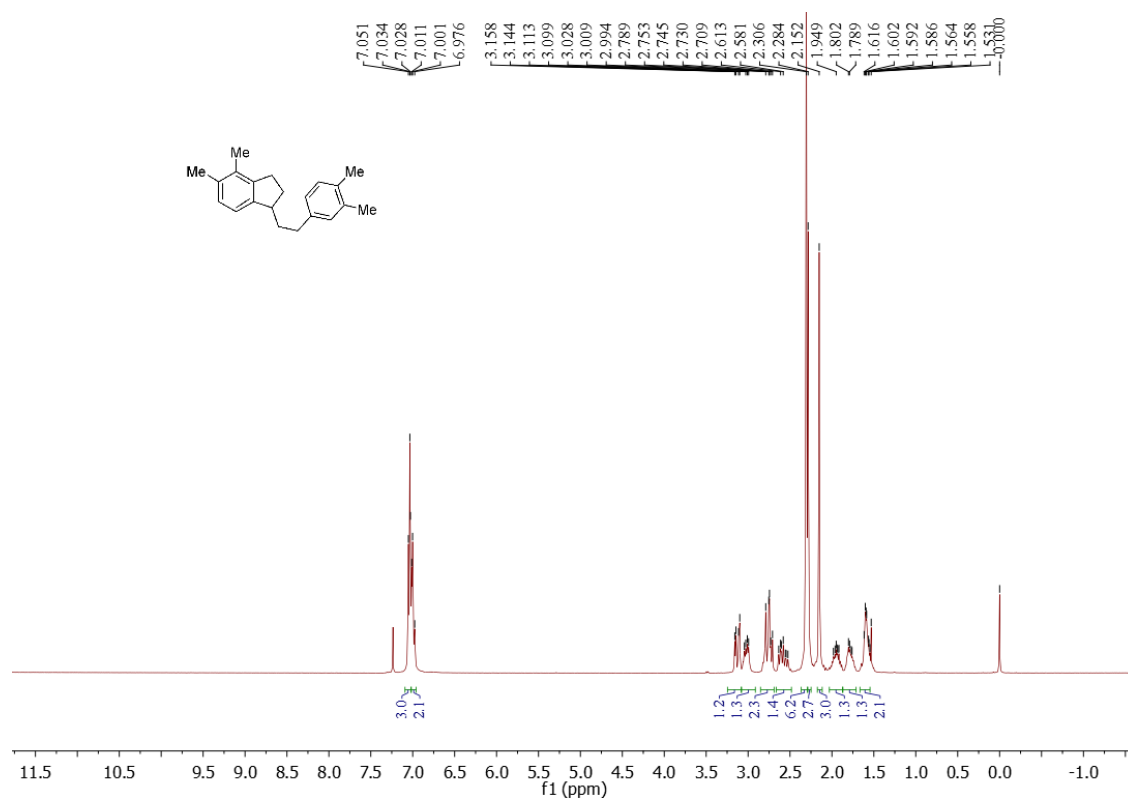

Figure S112. <sup>13</sup>C NMR spectrum of **5I**, related to Figure 3

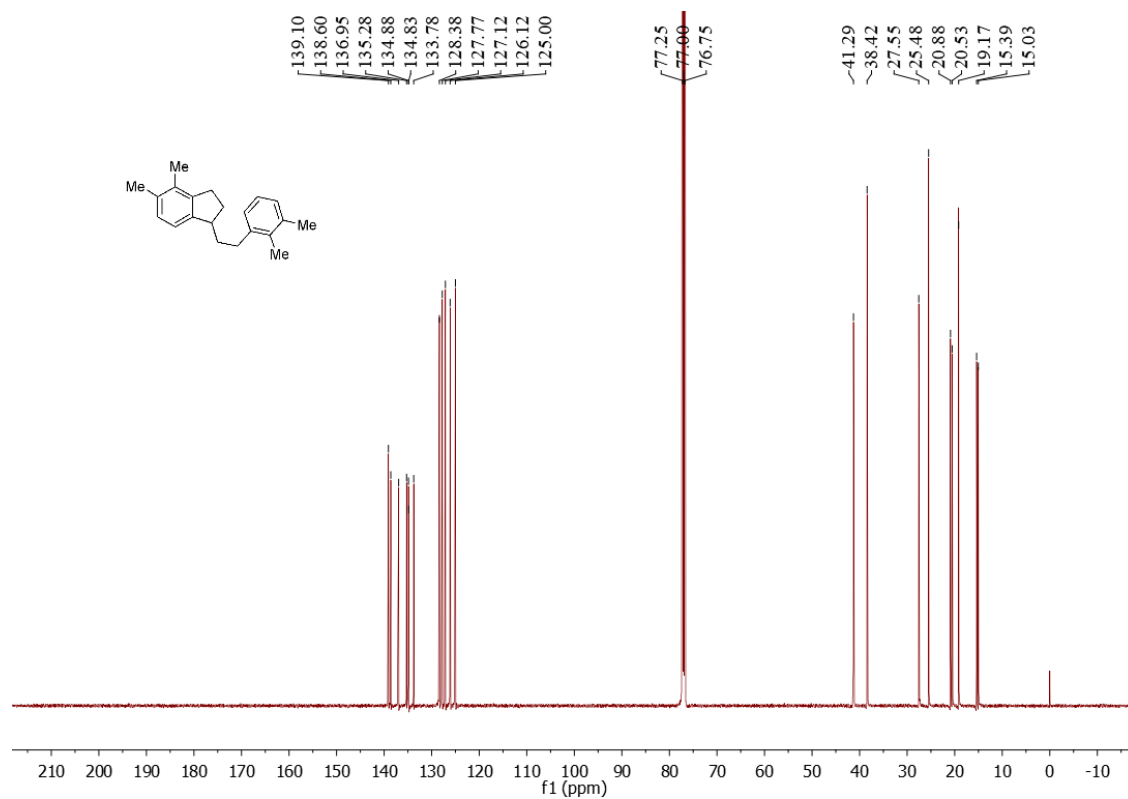

Figure S113. <sup>1</sup>H NMR spectrum of 5m, related to Figure 3

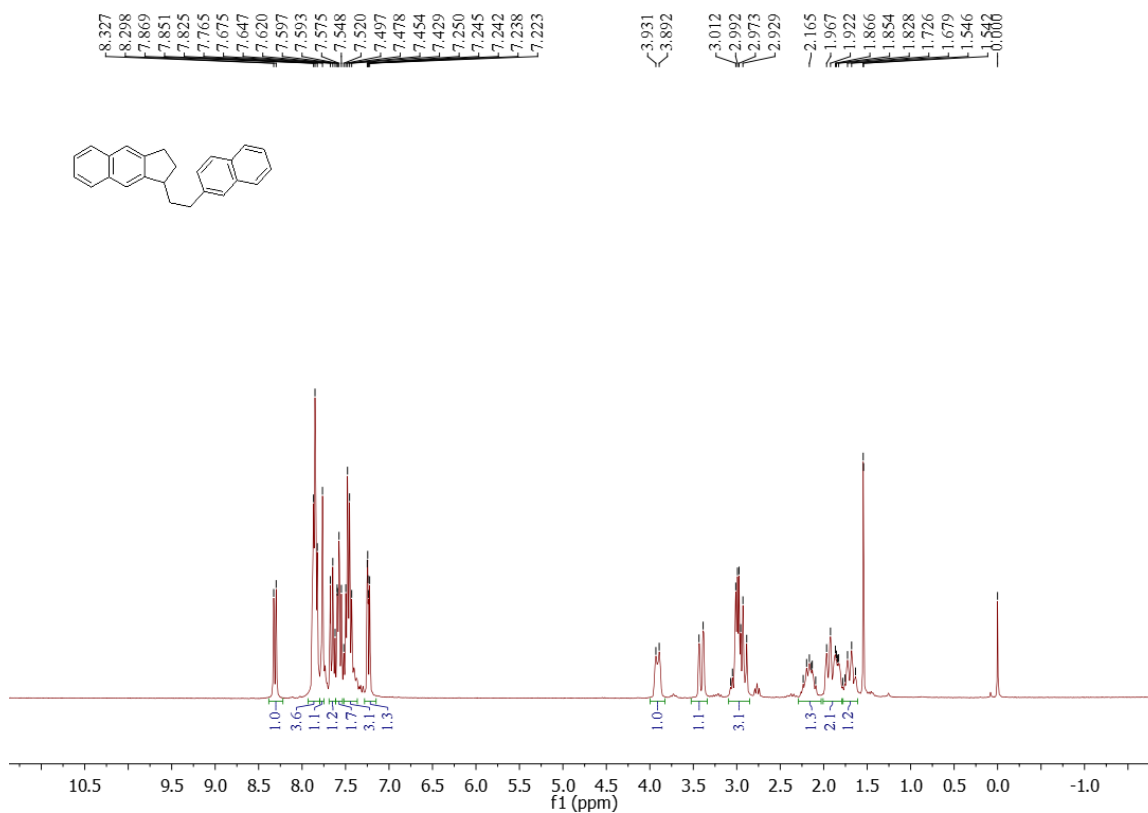

Figure S114. <sup>13</sup>C NMR spectrum of 5m, related to Figure 3

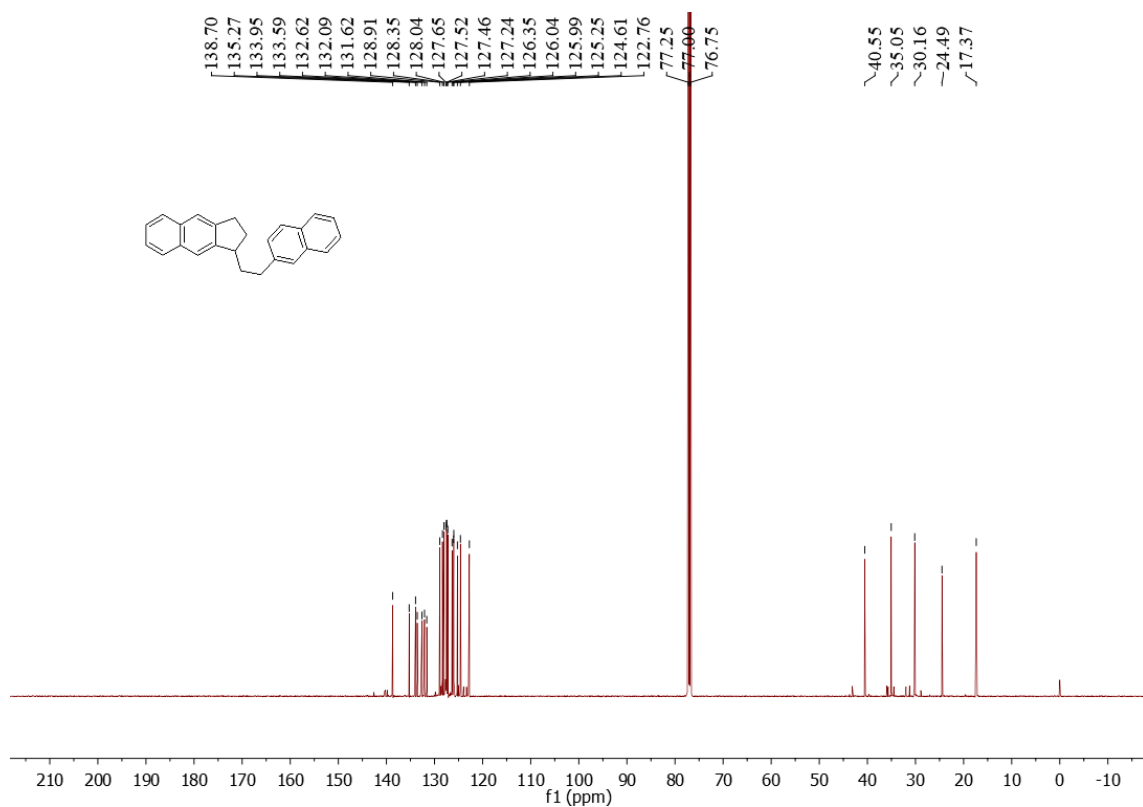

Figure S115. <sup>1</sup>H NMR spectrum of **5n**, related to Figure 3

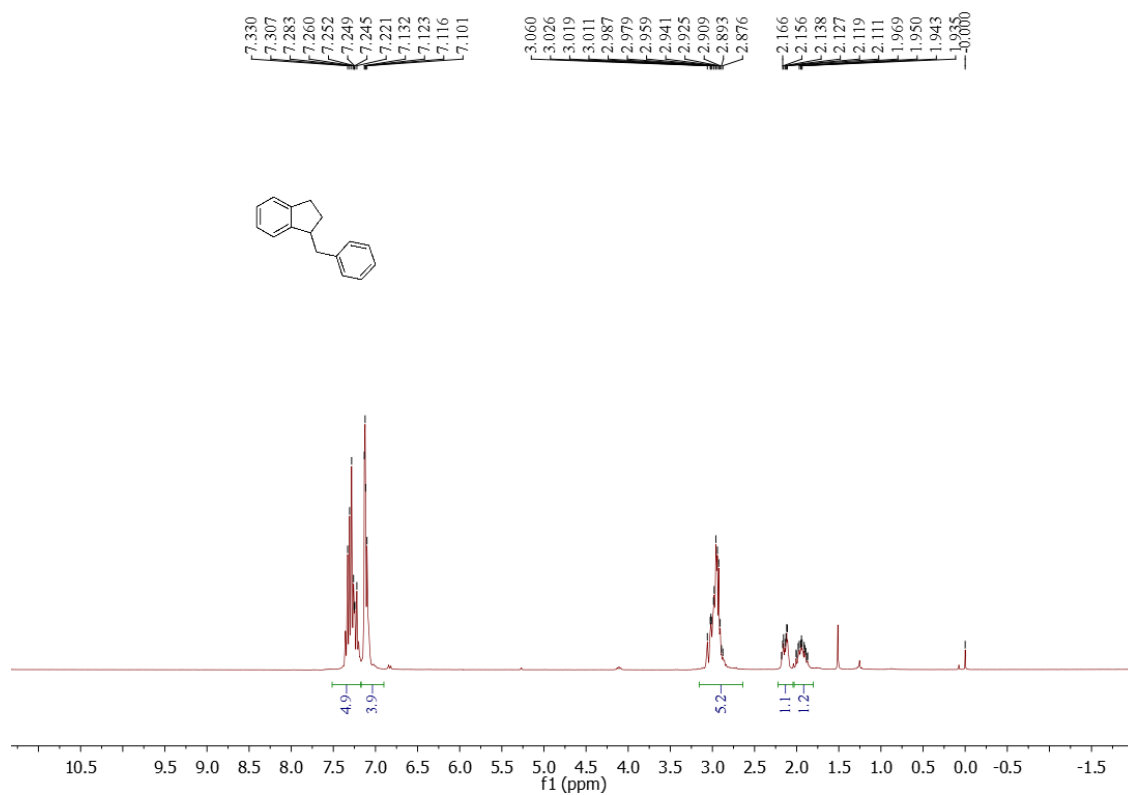

Figure S116. <sup>13</sup>C NMR spectrum of **5n**, related to Figure 3

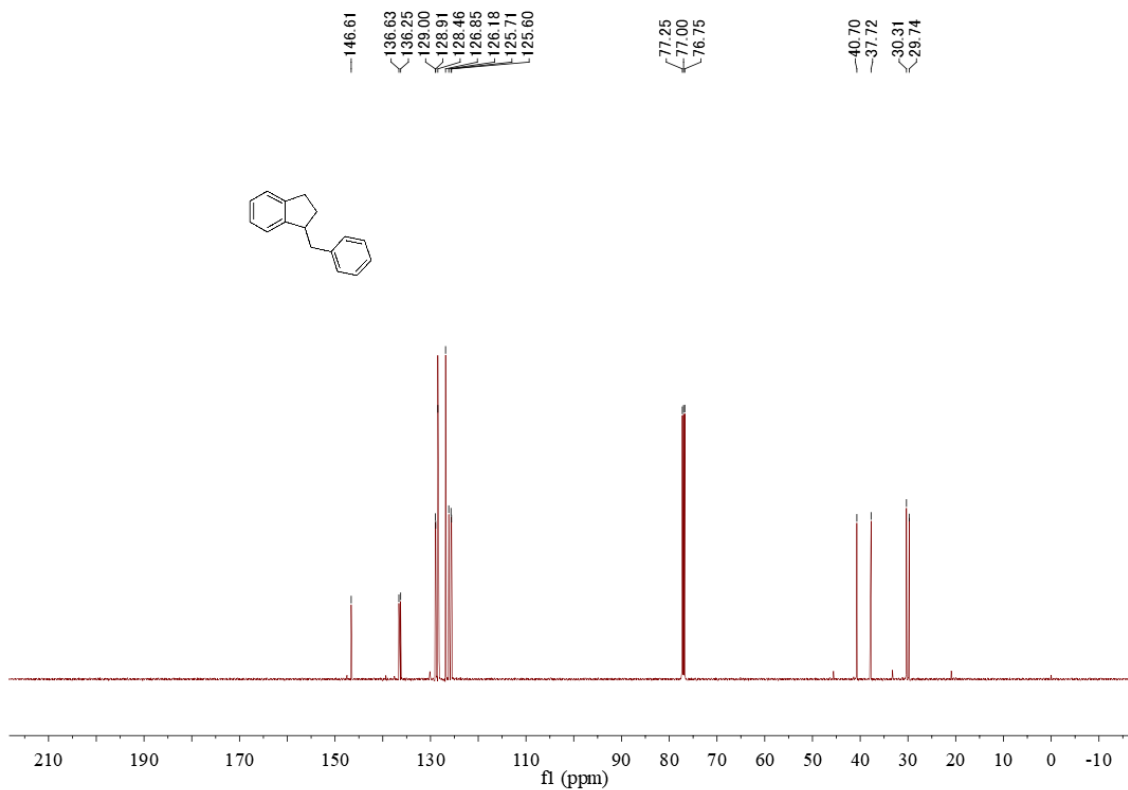

Figure S117. <sup>1</sup>H NMR spectrum of **5o**, related to Figure 3

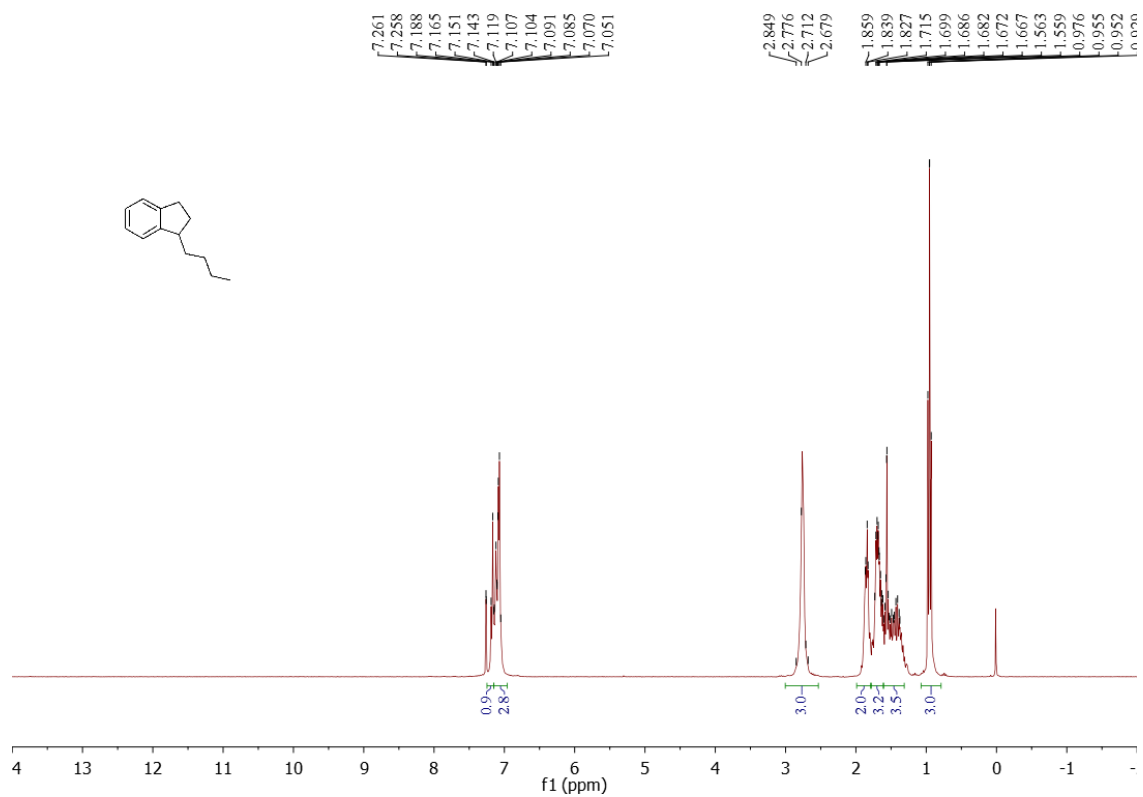

Figure S118. <sup>1</sup>H NMR spectrum of **5p**, related to Figure 3

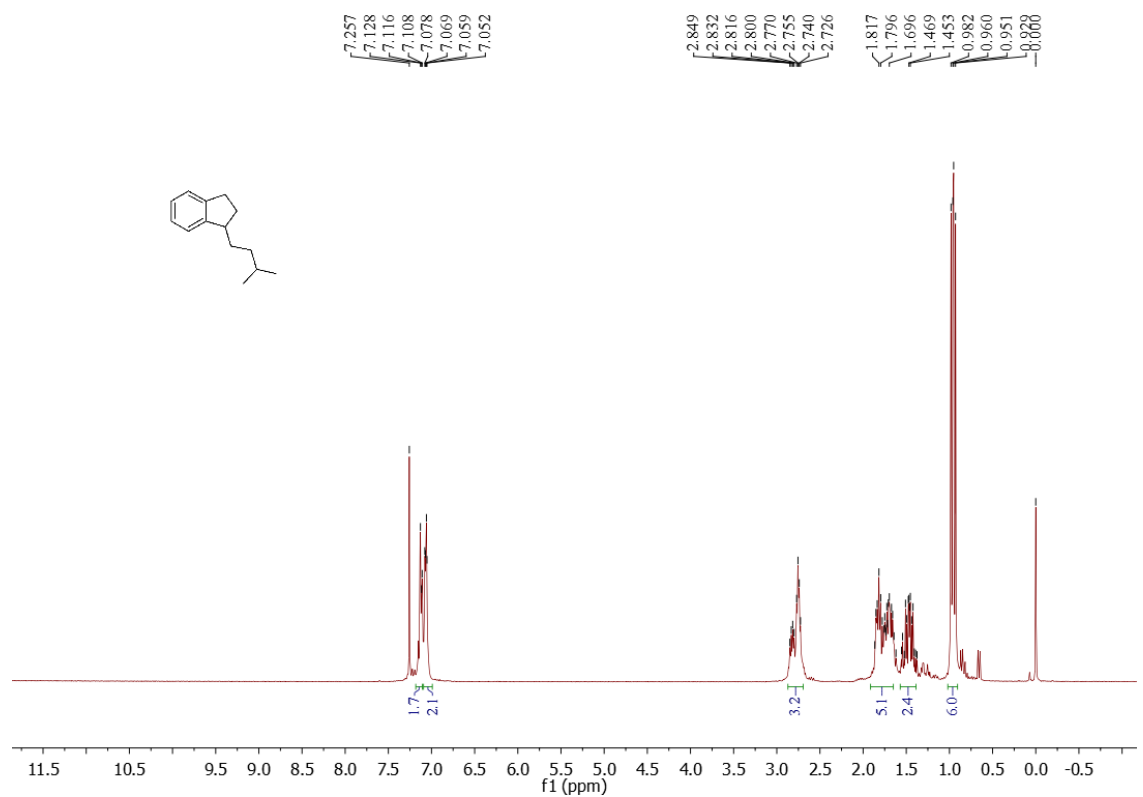

Figure S119. <sup>13</sup>C NMR spectrum of **5p**, related to Figure 3

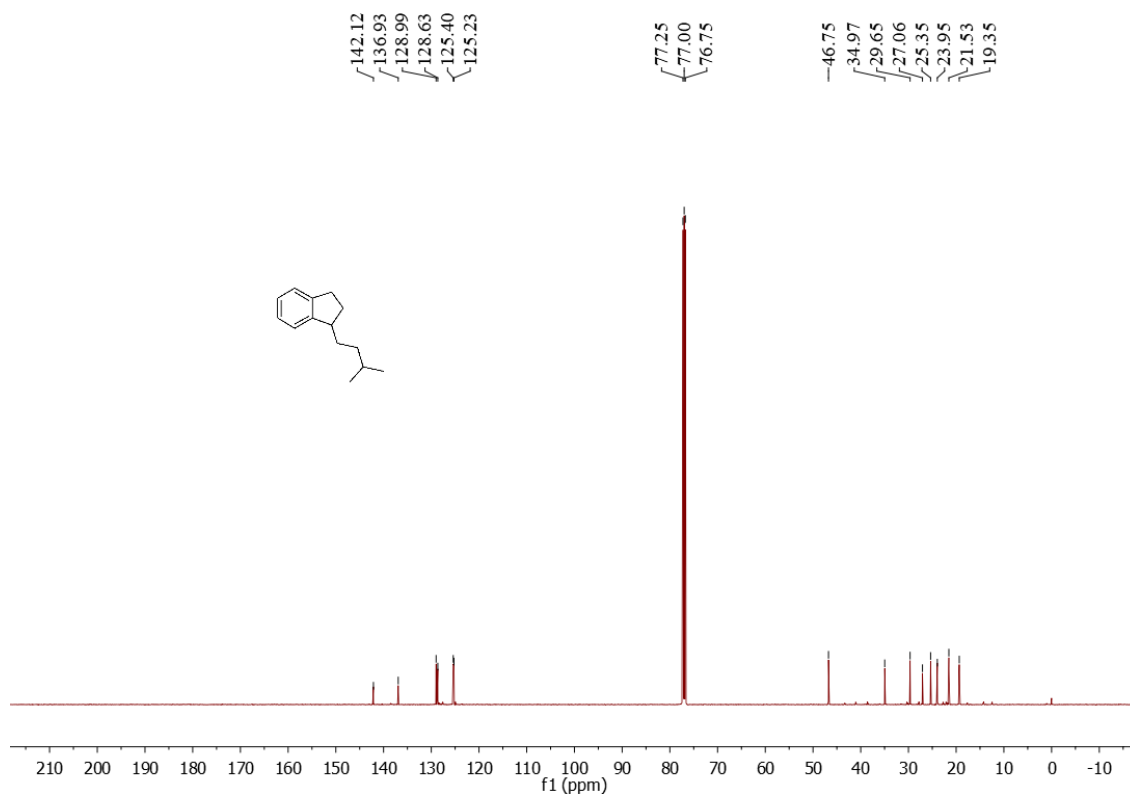

Figure S120. <sup>1</sup>H NMR spectrum of **5q**, related to Figure 3

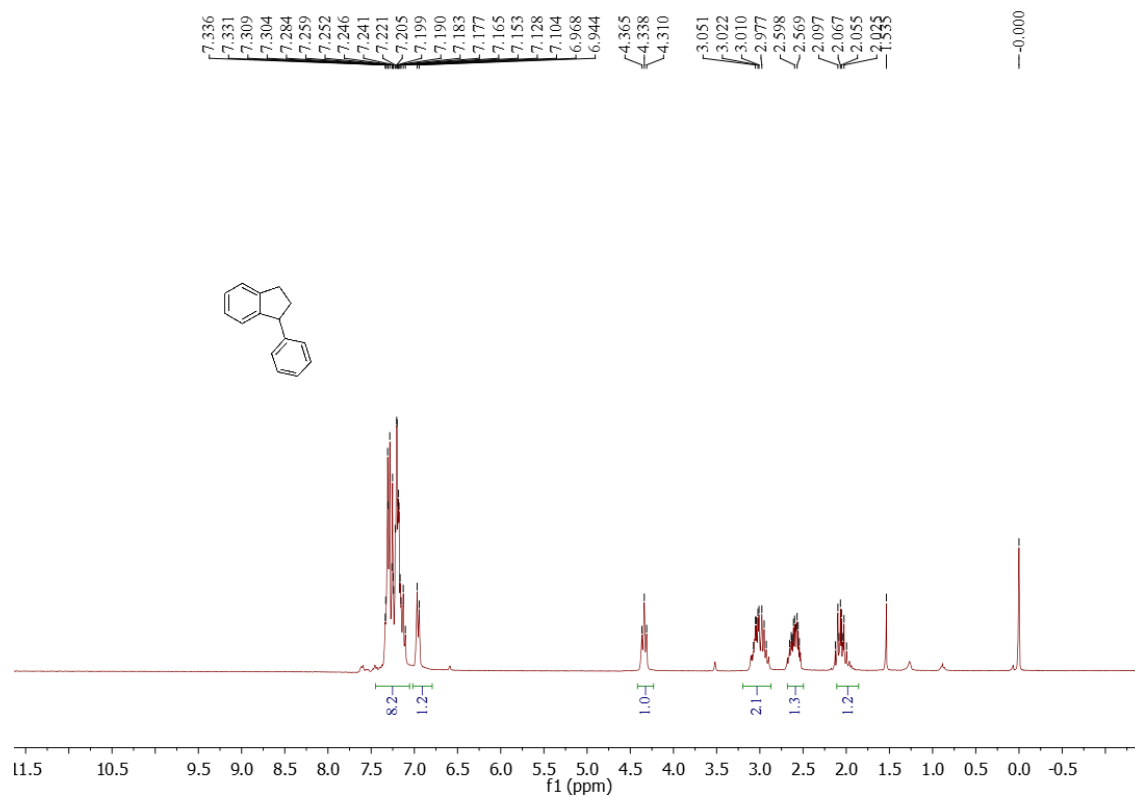

Figure S121. <sup>1</sup>H NMR spectrum of **5r**, related to **Figure 3**

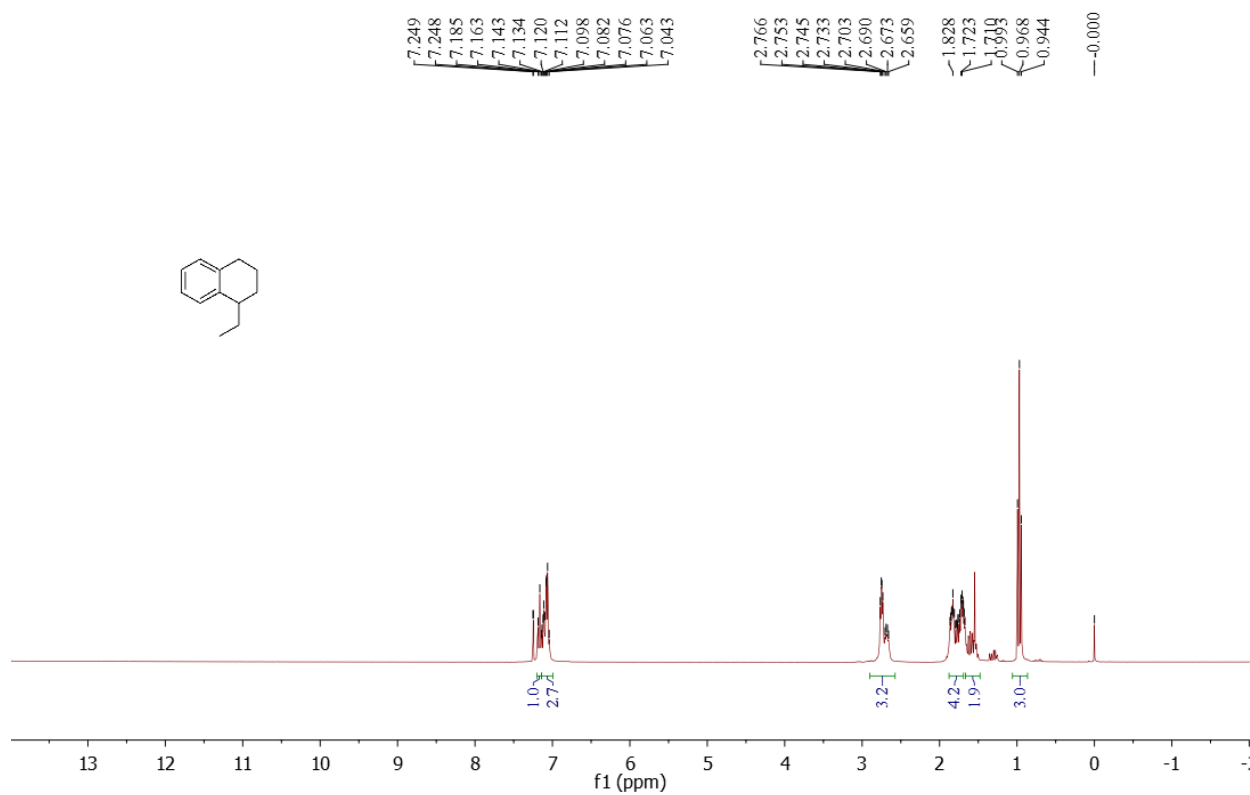

Figure S122. <sup>1</sup>H NMR spectrum of **5s**, related to **Figure 3**

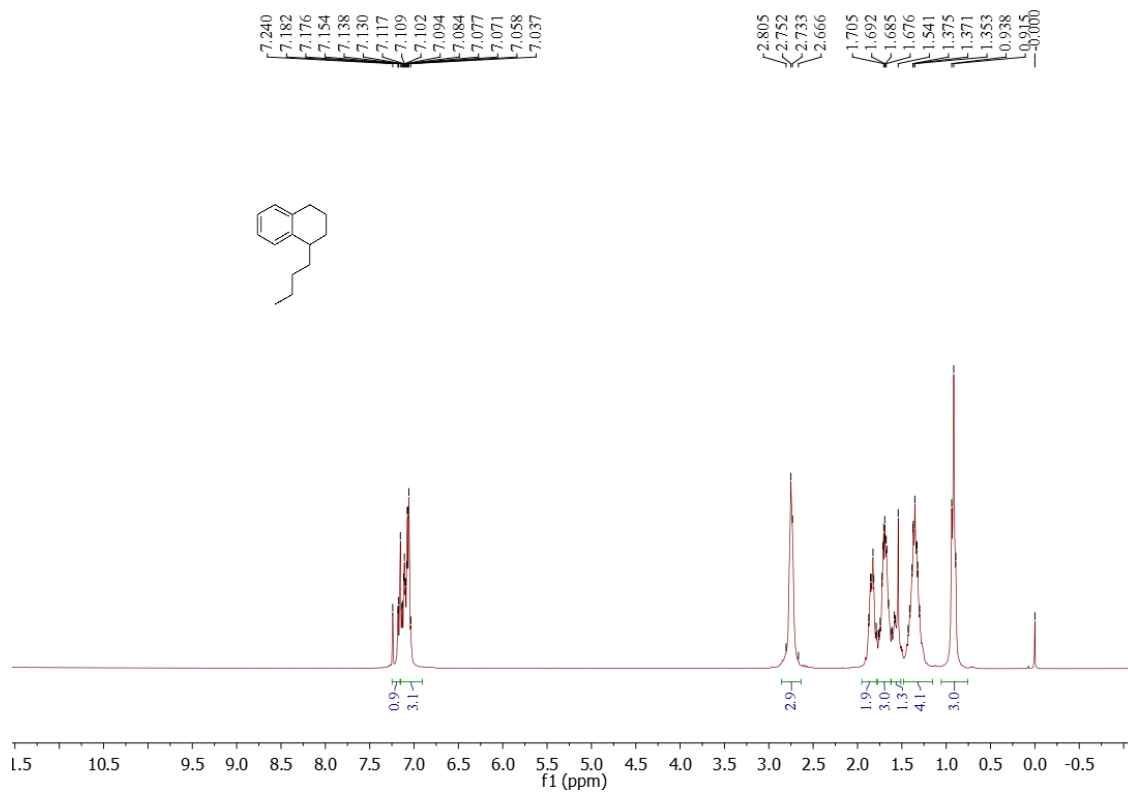

Figure S123. <sup>1</sup>H NMR spectrum of unknown *gem*-difluoride **1b**, related to Figure 2

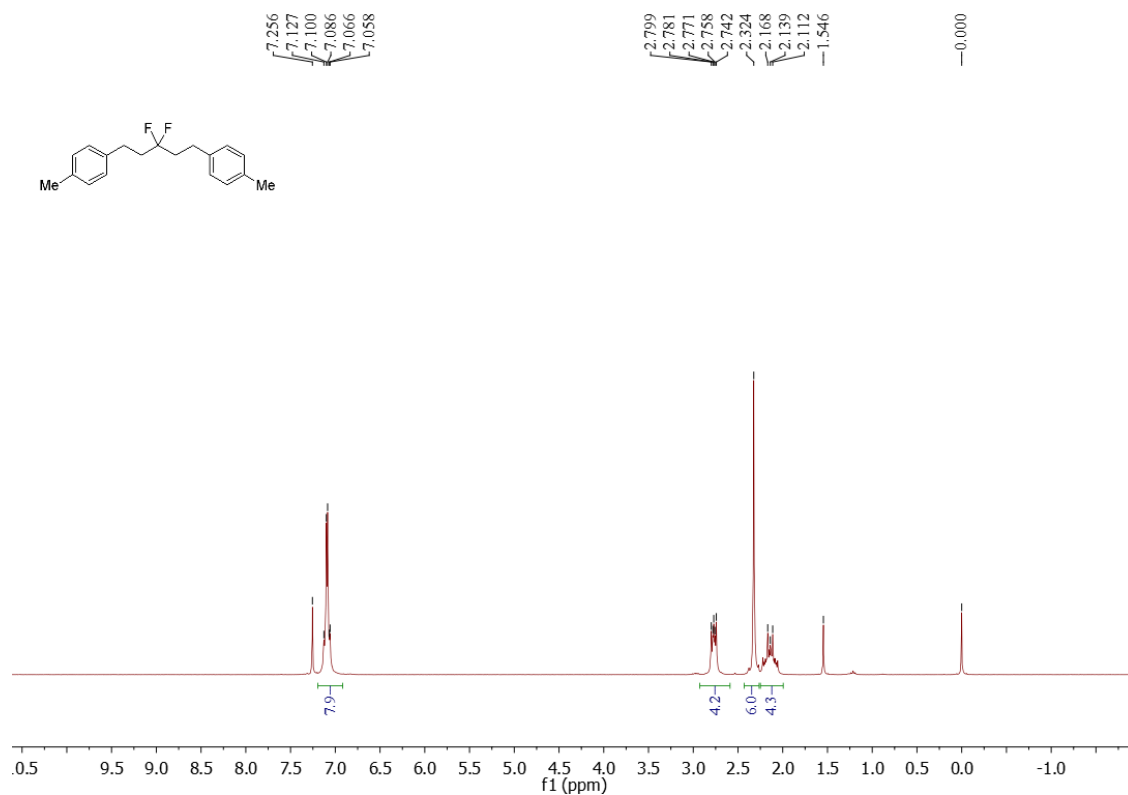

Figure S124. <sup>13</sup>C NMR spectrum of unknown *gem*-difluoride **1b**, related to Figure 2

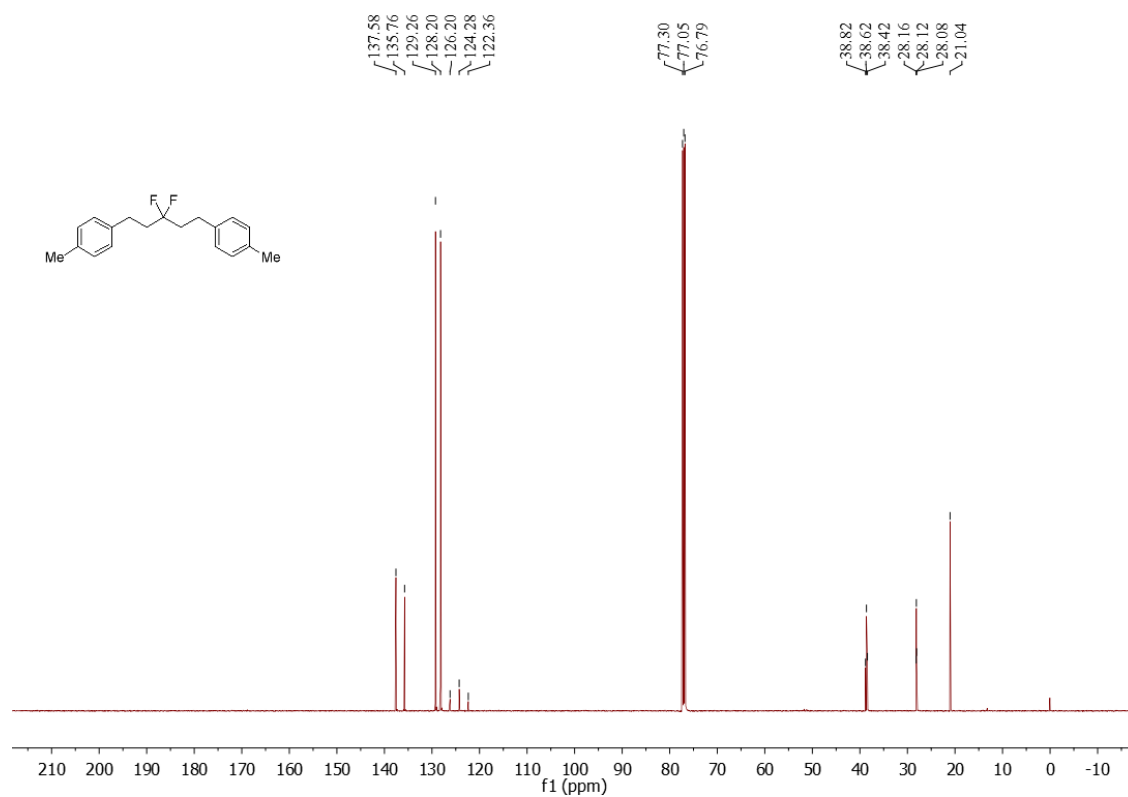



Figure S125.  $^{19}\text{F}$  NMR spectrum of unknown *gem*-difluoride **1b**, related to Figure 2

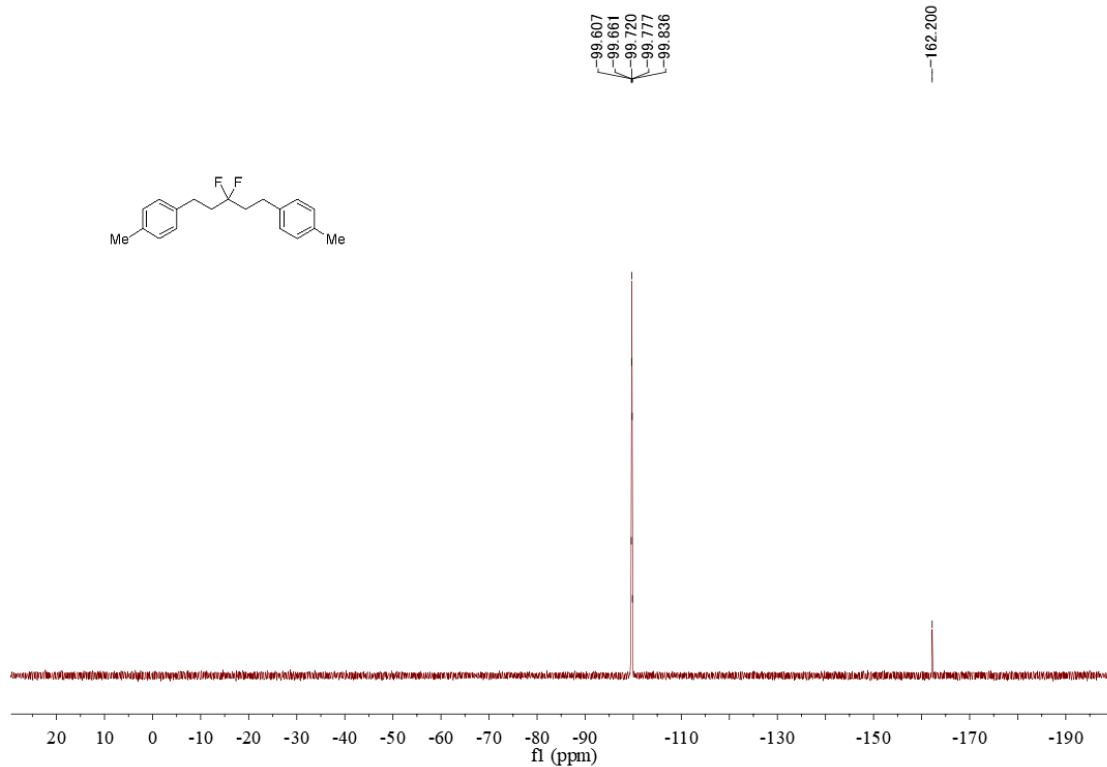

Figure S126.  $^1\text{H}$  NMR spectrum of unknown *gem*-difluoride **1c**, related to Figure 2

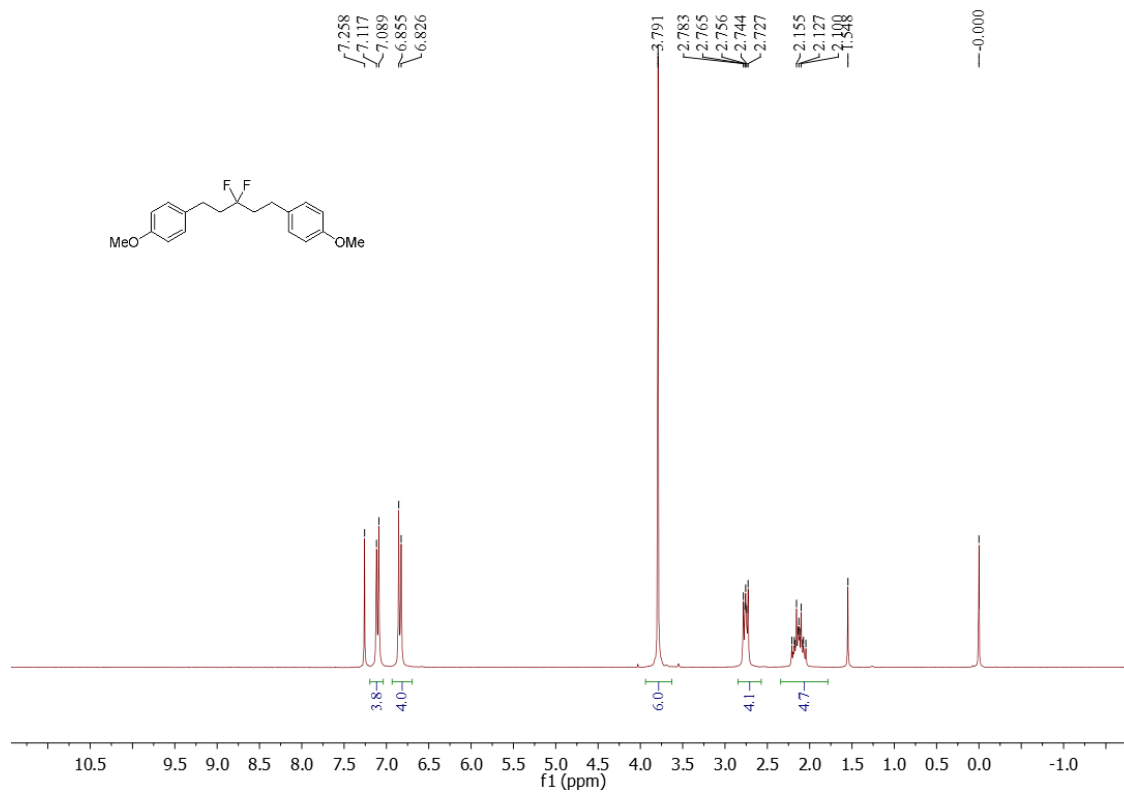

Figure S127.  $^{13}\text{C}$  NMR spectrum of unknown *gem*-difluoride **1c**, related to Figure 2

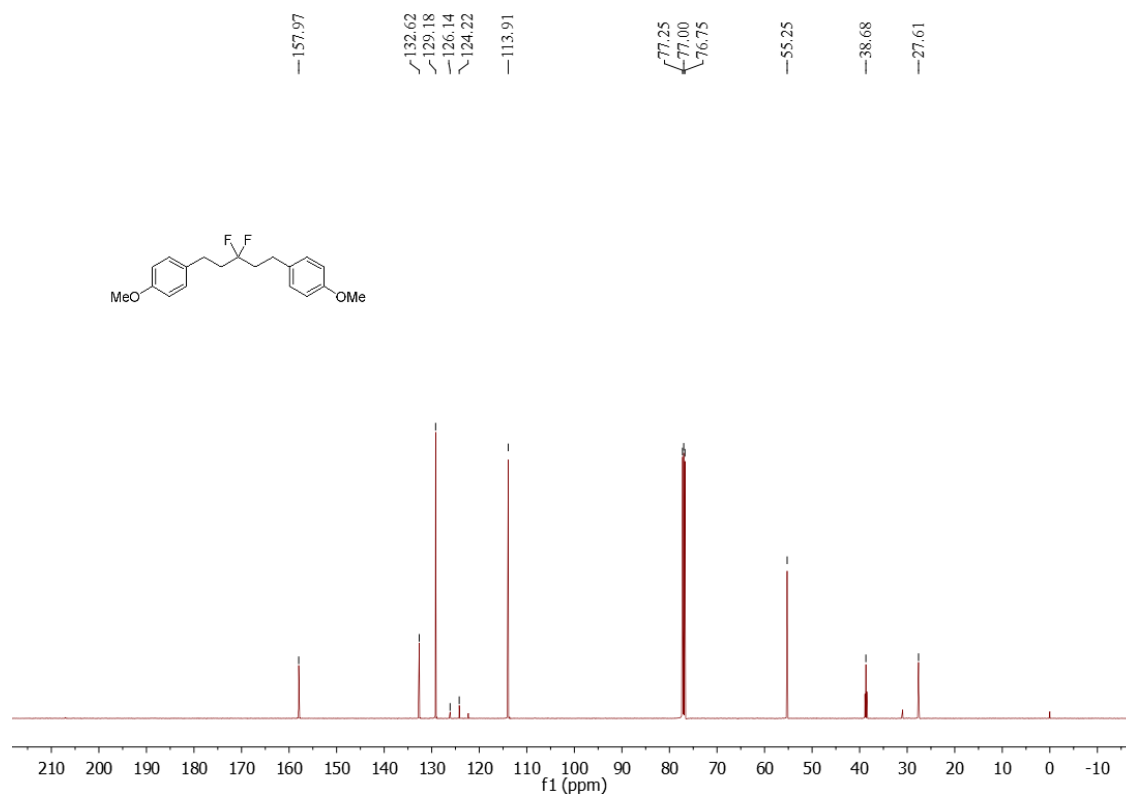

Figure S128.  $^{19}\text{F}$  NMR spectrum of unknown *gem*-difluoride **1c**, related to Figure 2

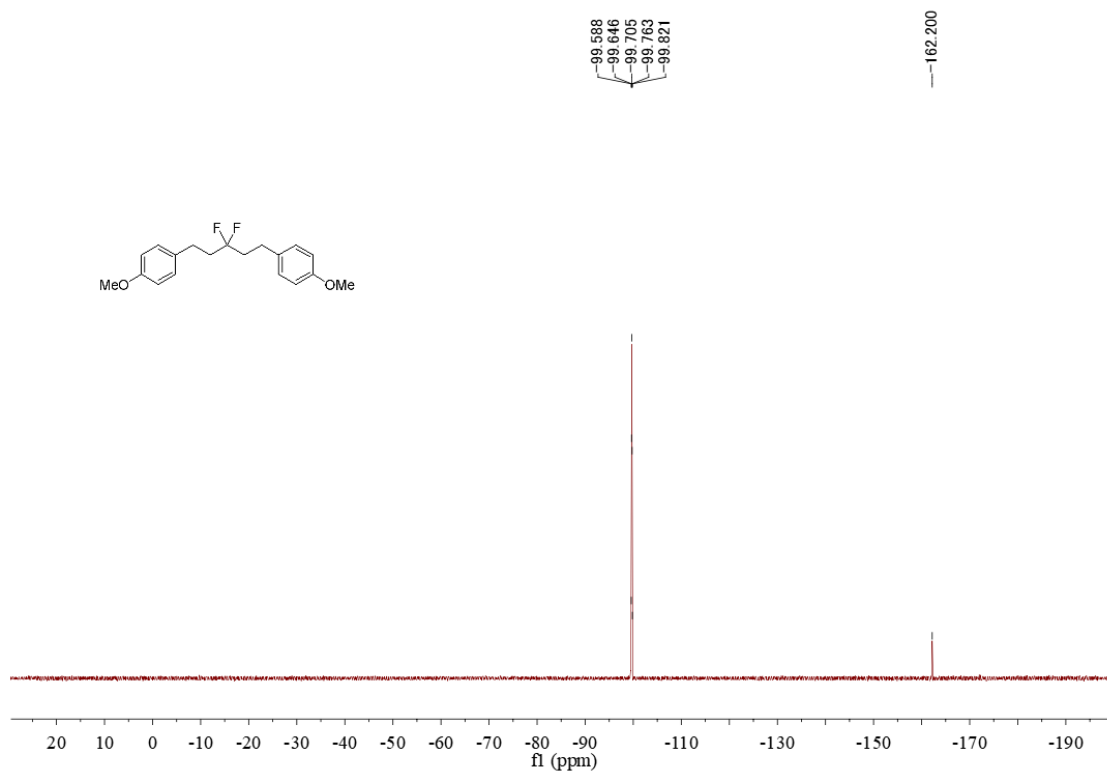

Figure S129. <sup>1</sup>H NMR spectrum of unknown *gem*-difluoride **1d**, related to Figure 2

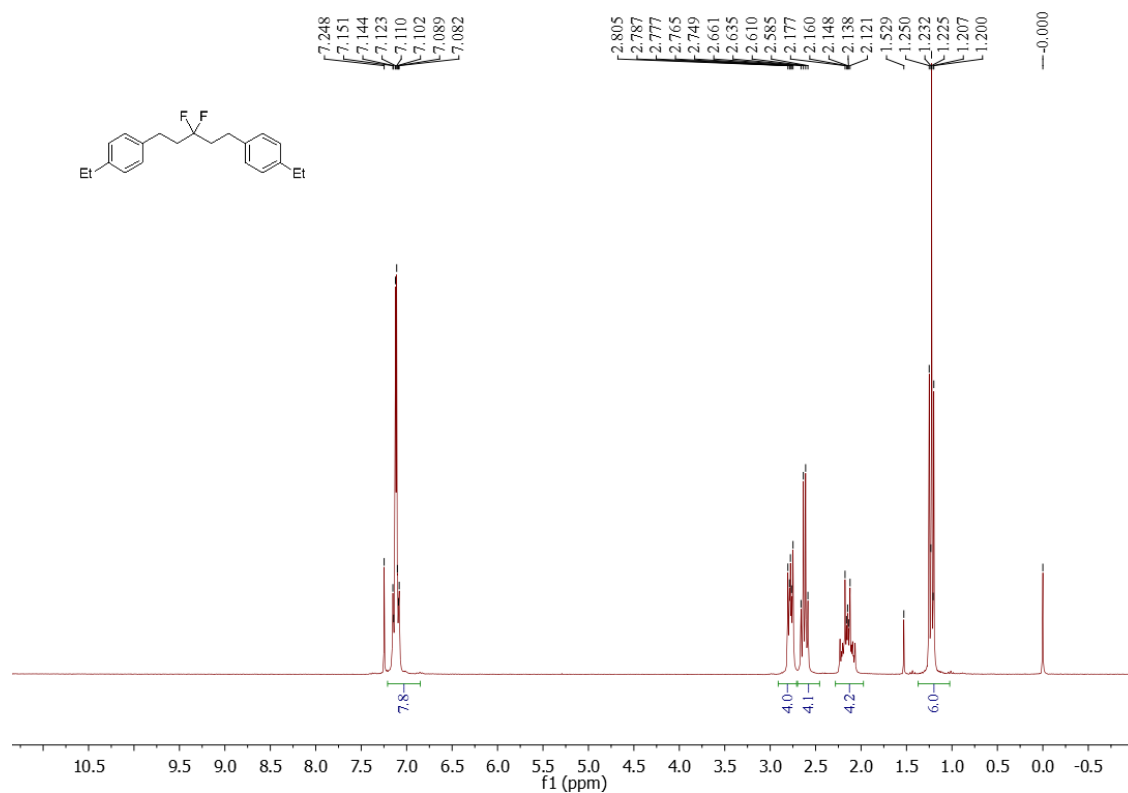

Figure S130. <sup>13</sup>C NMR spectrum of unknown *gem*-difluoride **1d**, related to Figure 2

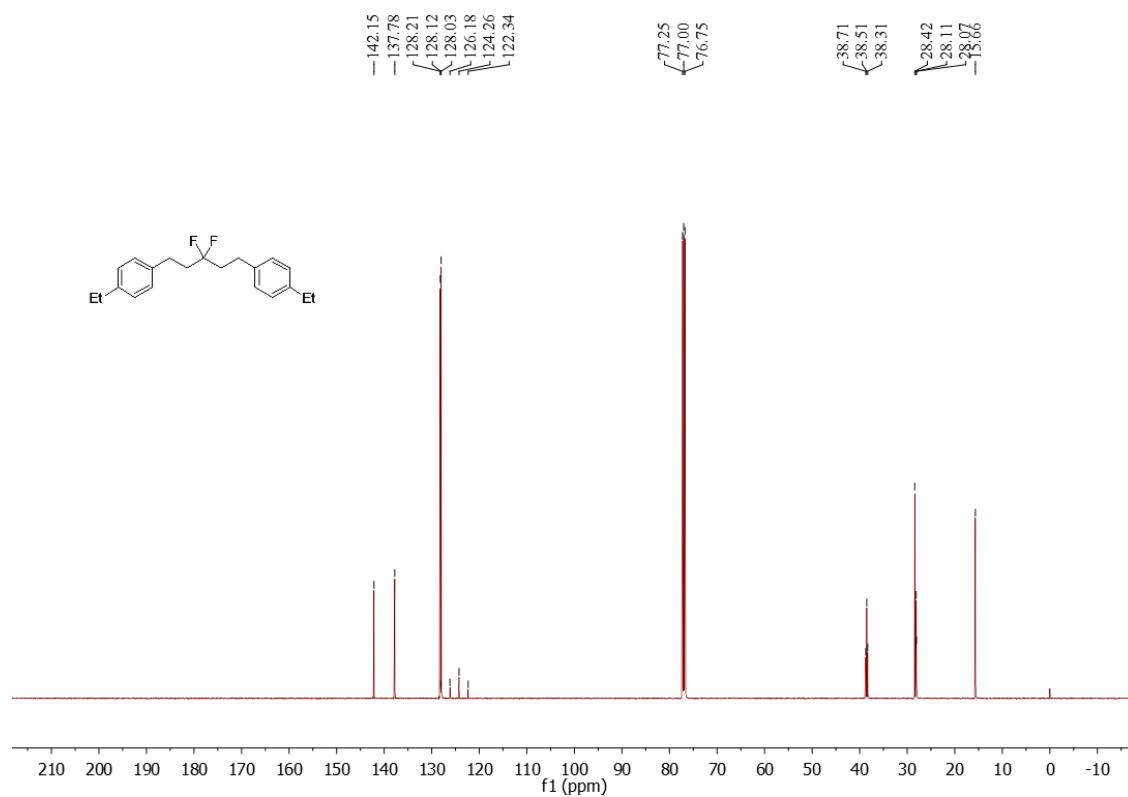

Figure S131.  $^{19}\text{F}$  NMR spectrum of unknown *gem*-difluoride **1d**, related to Figure 2

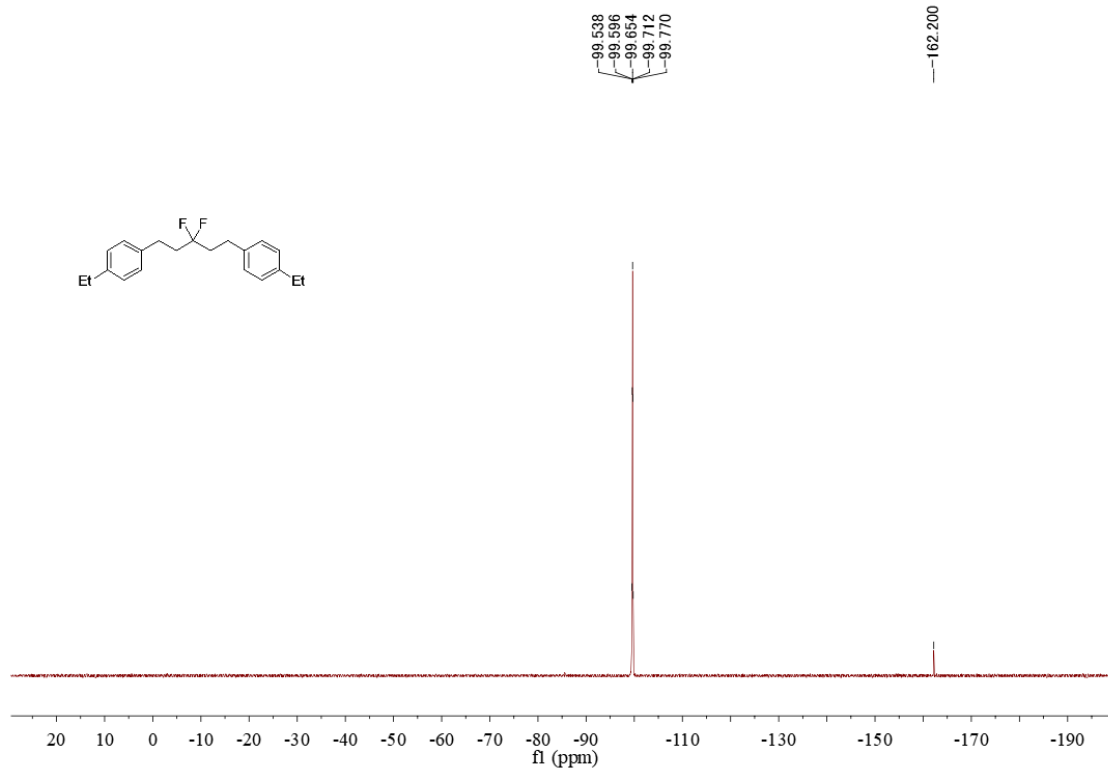

Figure S132.  $^1\text{H}$  NMR spectrum of unknown *gem*-difluoride **1e**, related to Figure 2

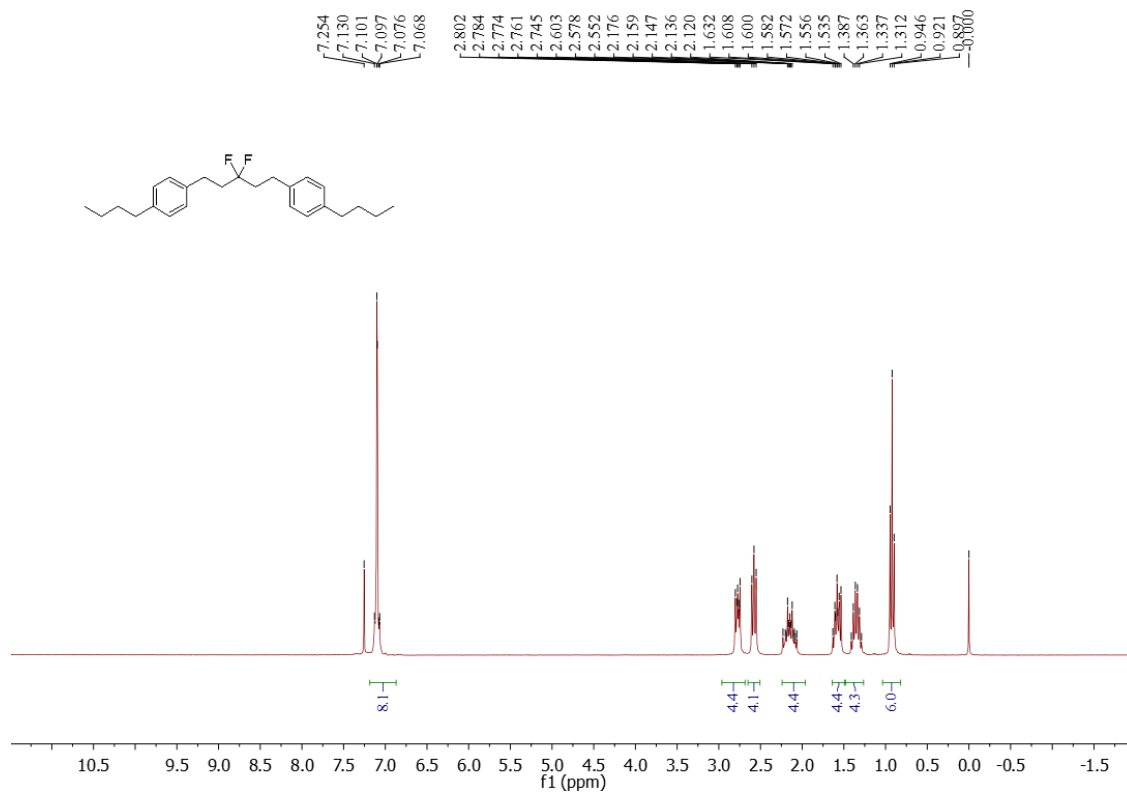

Figure S133.  $^{13}\text{C}$  NMR spectrum of unknown *gem*-difluoride **1e**, related to **Figure 2**

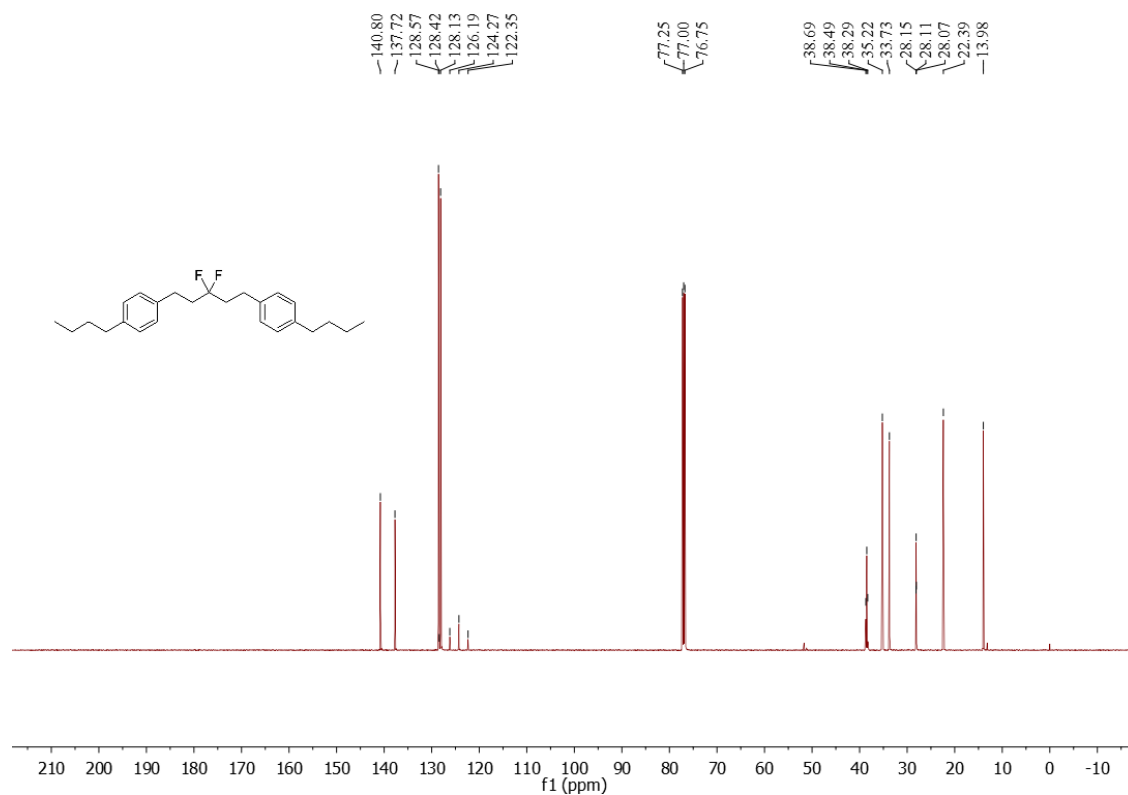

Figure S134.  $^{19}\text{F}$  NMR spectrum of unknown *gem*-difluoride **1e**, related to **Figure 2**

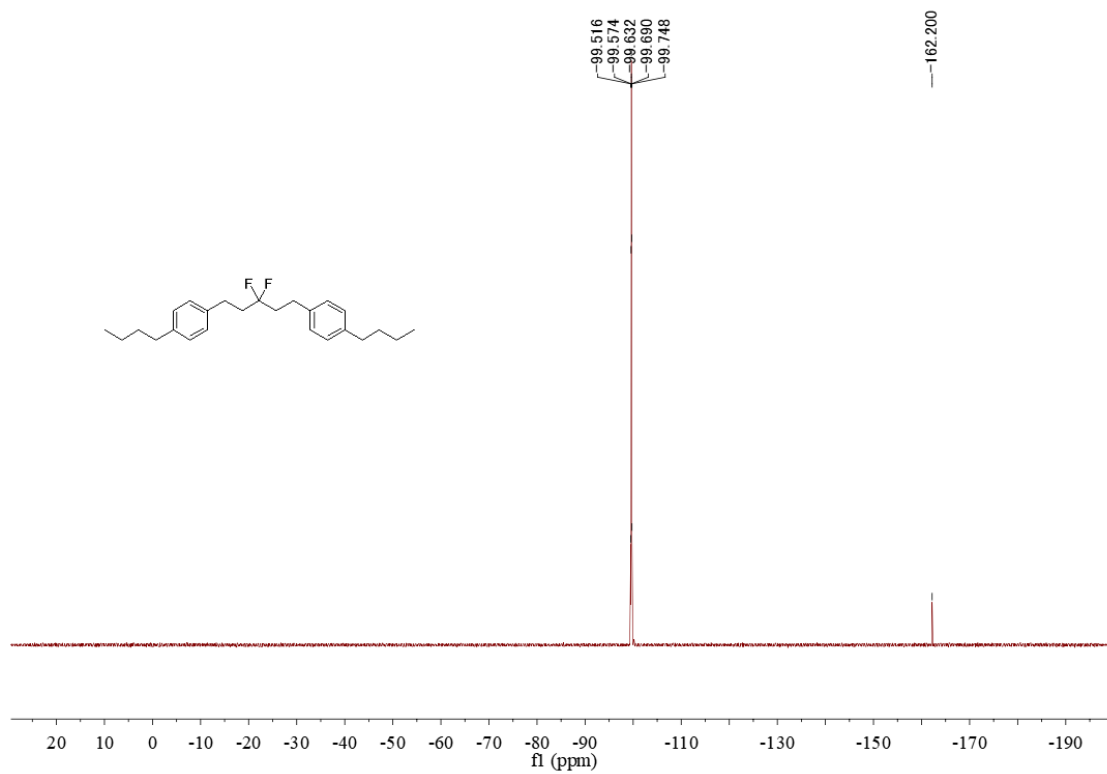

Figure S135. <sup>1</sup>H NMR spectrum of unknown *gem*-difluoride **1f**, related to **Figure 2**

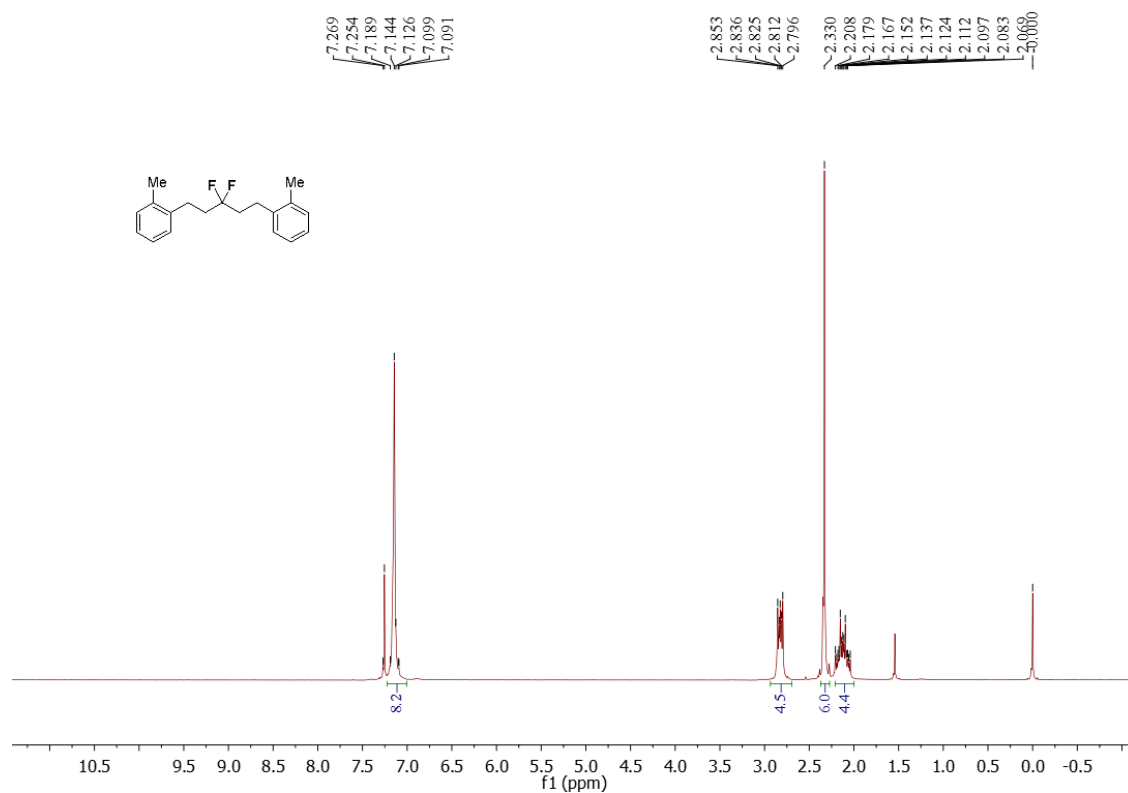

Figure S136. <sup>13</sup>C NMR spectrum of unknown *gem*-difluoride **1f**, related to **Figure 2**

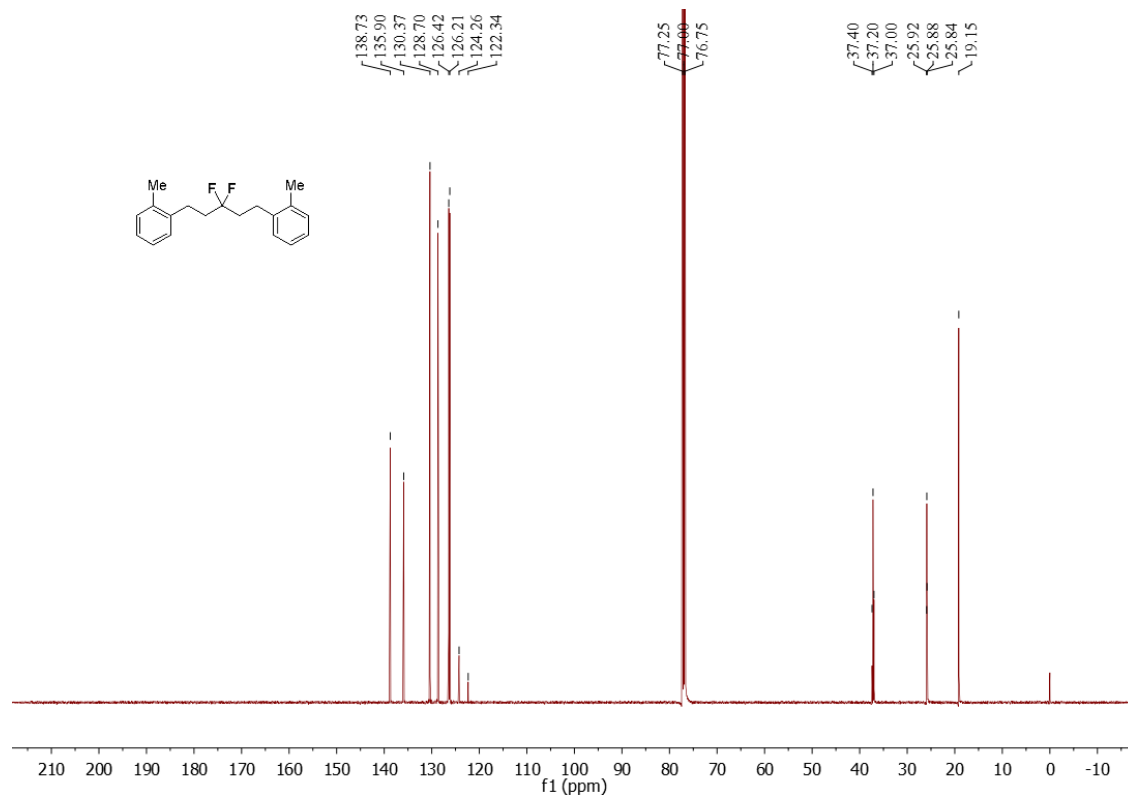

Figure S137.  $^{19}\text{F}$  NMR spectrum of unknown *gem*-difluoride **1f**, related to Figure 2

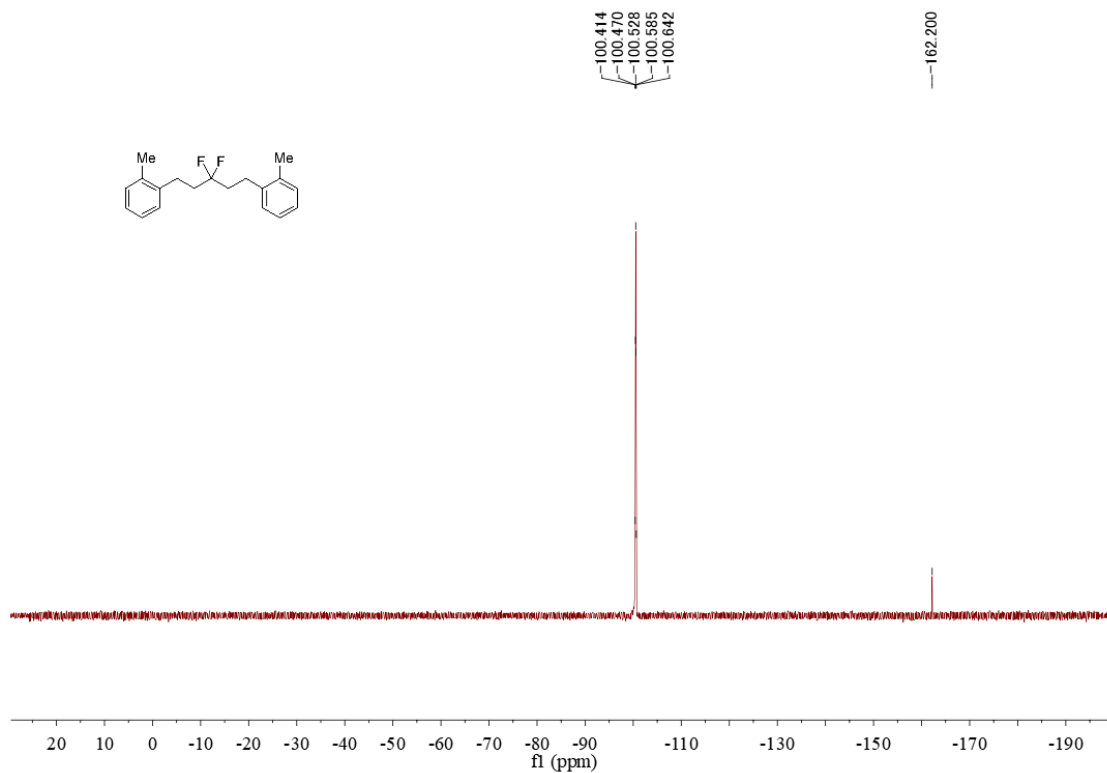

Figure S138.  $^1\text{H}$  NMR spectrum of unknown *gem*-difluoride **1g**, related to Figure 2

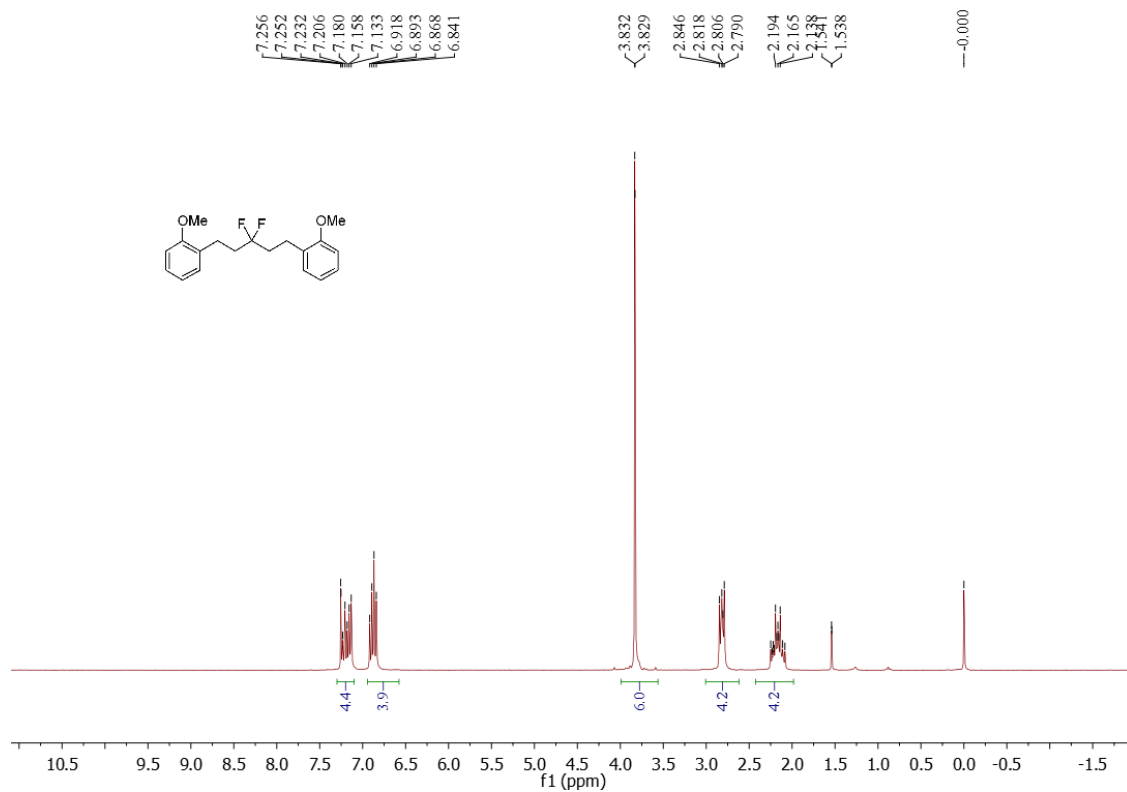

Figure S139.  $^{13}\text{C}$  NMR spectrum of unknown *gem*-difluoride **1g**, related to Figure 2

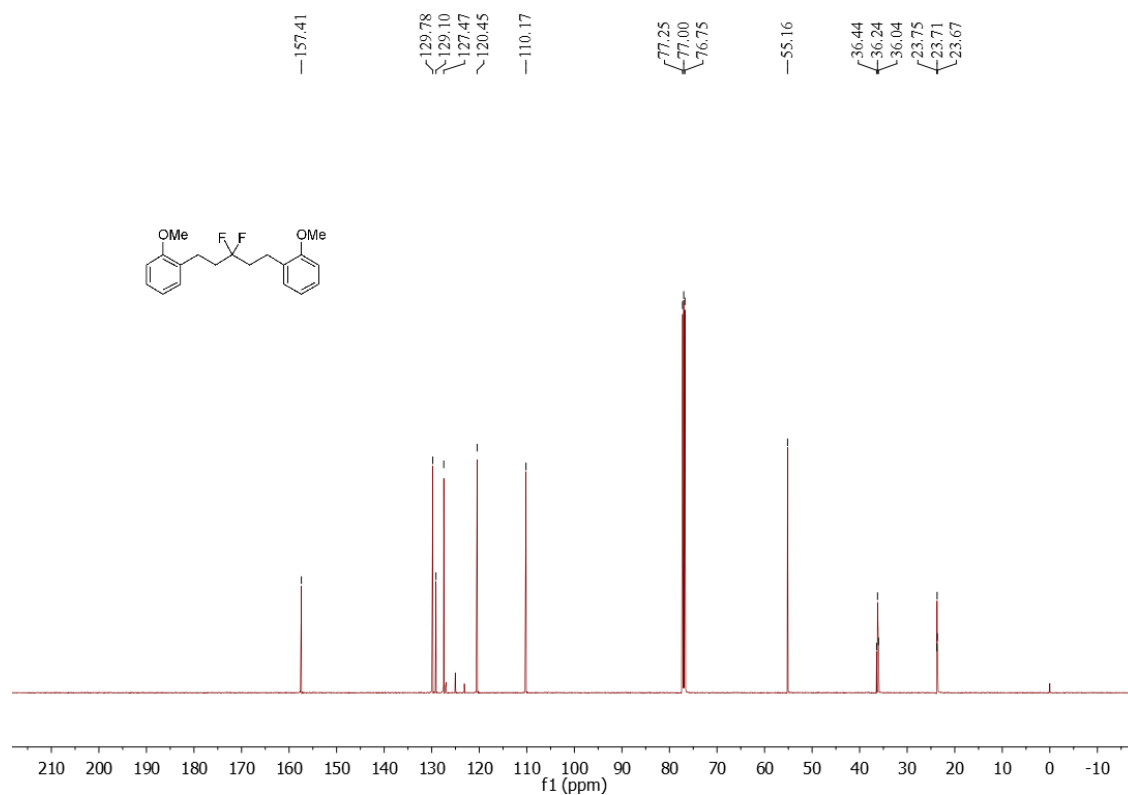

Figure S140.  $^{19}\text{F}$  NMR spectrum of unknown *gem*-difluoride **1g**, related to Figure 2

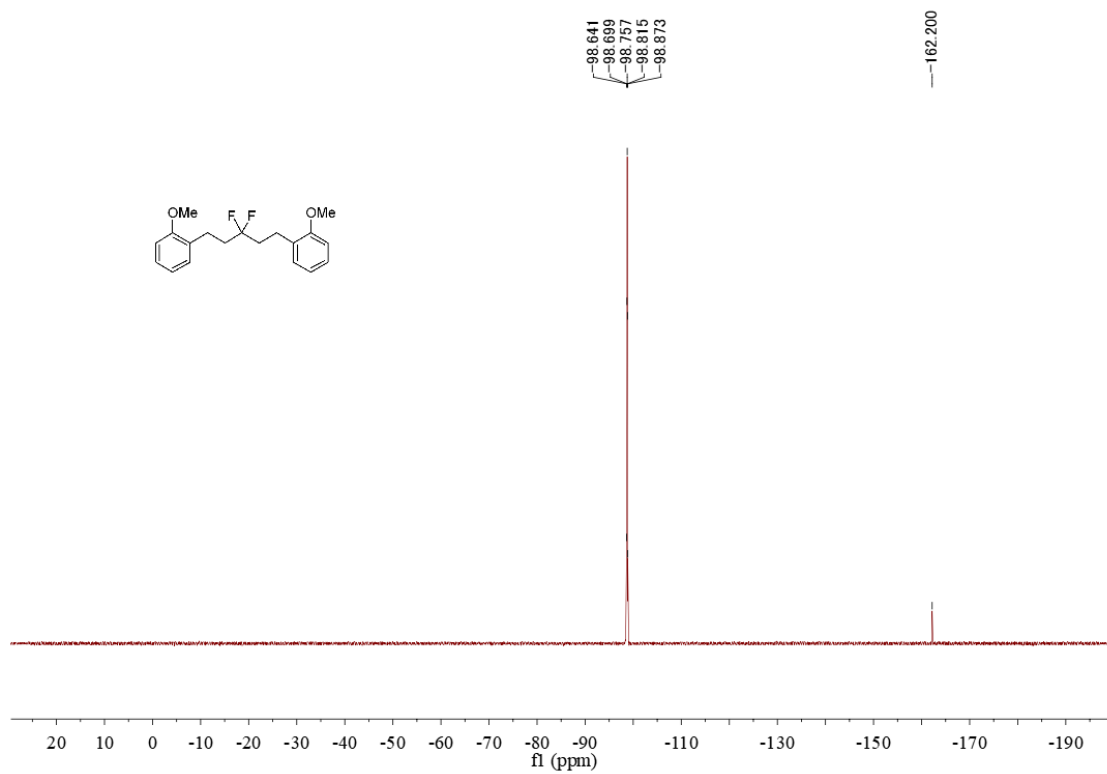



Figure S141. <sup>1</sup>H NMR spectrum of unknown *gem*-difluoride **1h**, related to Figure 2

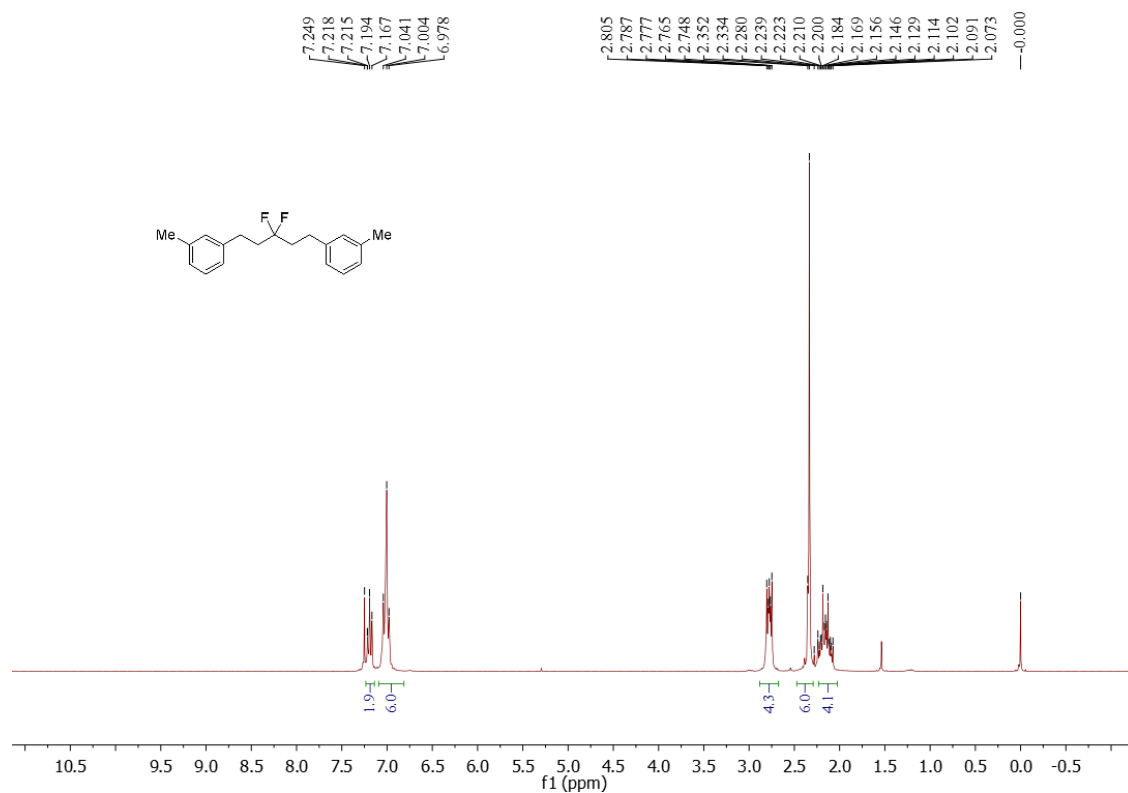

Figure S142. <sup>13</sup>C NMR spectrum of unknown *gem*-difluoride **1h**, related to Figure 2

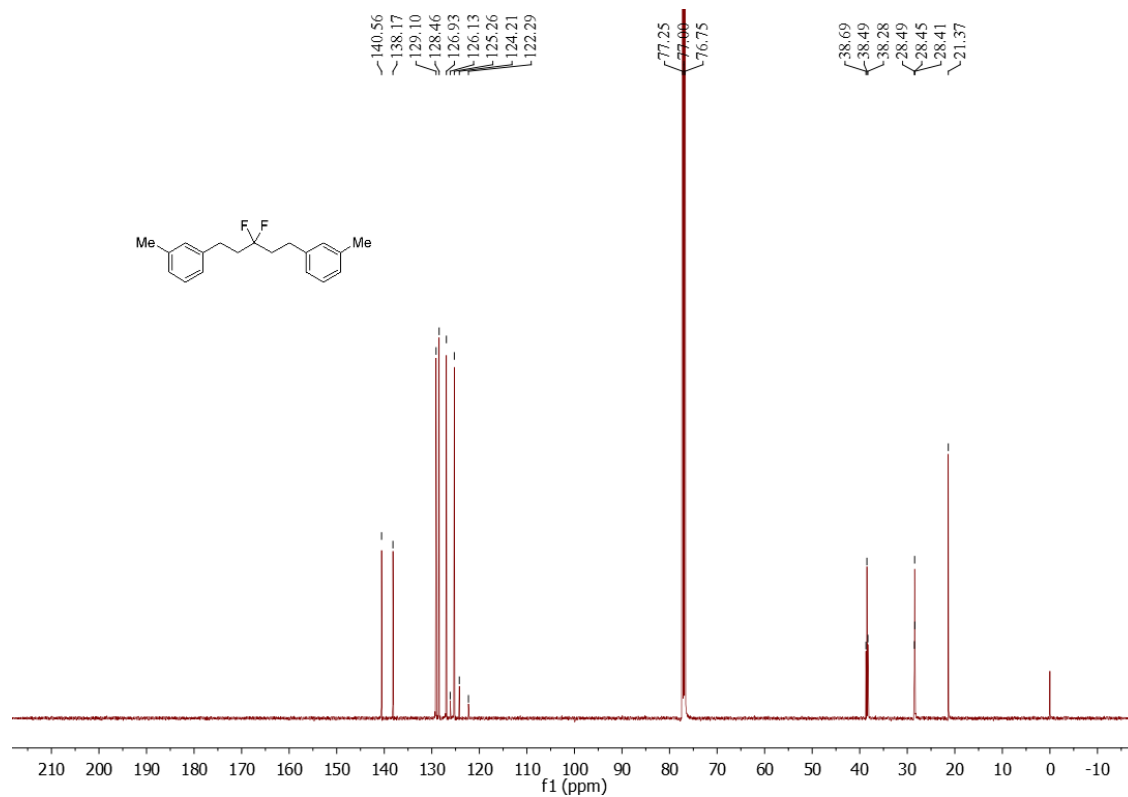

Figure S143.  $^{19}\text{F}$  NMR spectrum of unknown *gem*-difluoride **1h**, related to Figure 2

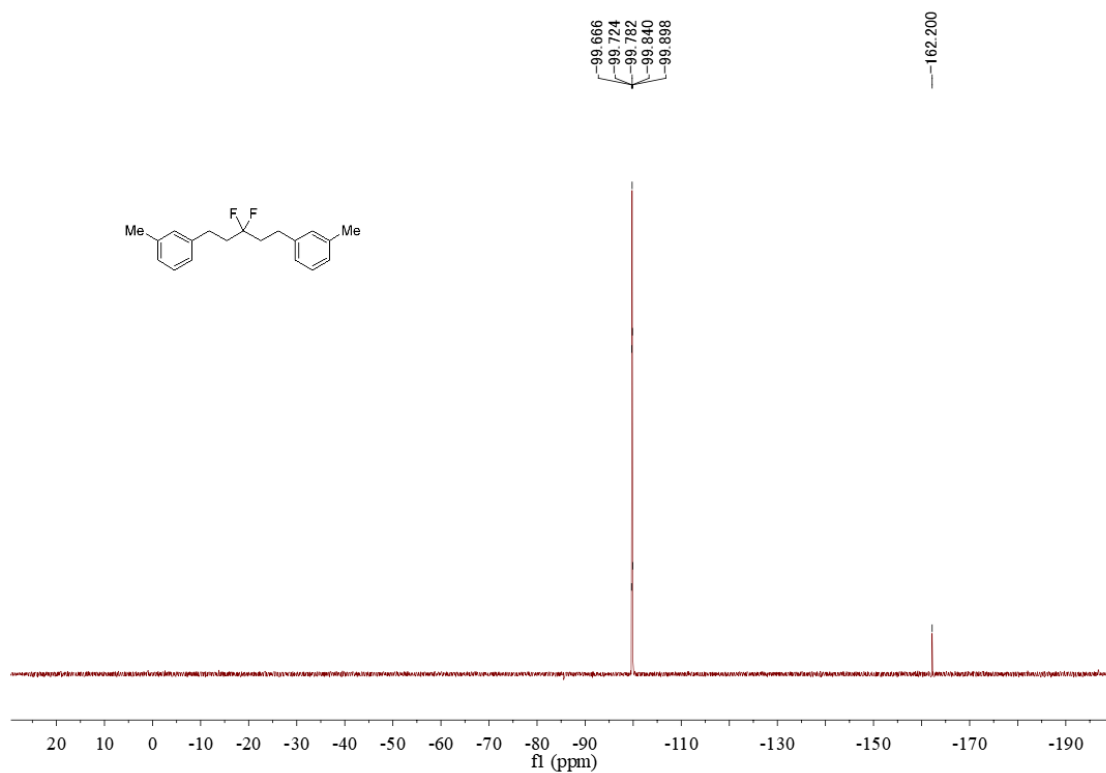

Figure S144.  $^1\text{H}$  NMR spectrum of unknown *gem*-difluoride **1i**, related to Figure 2

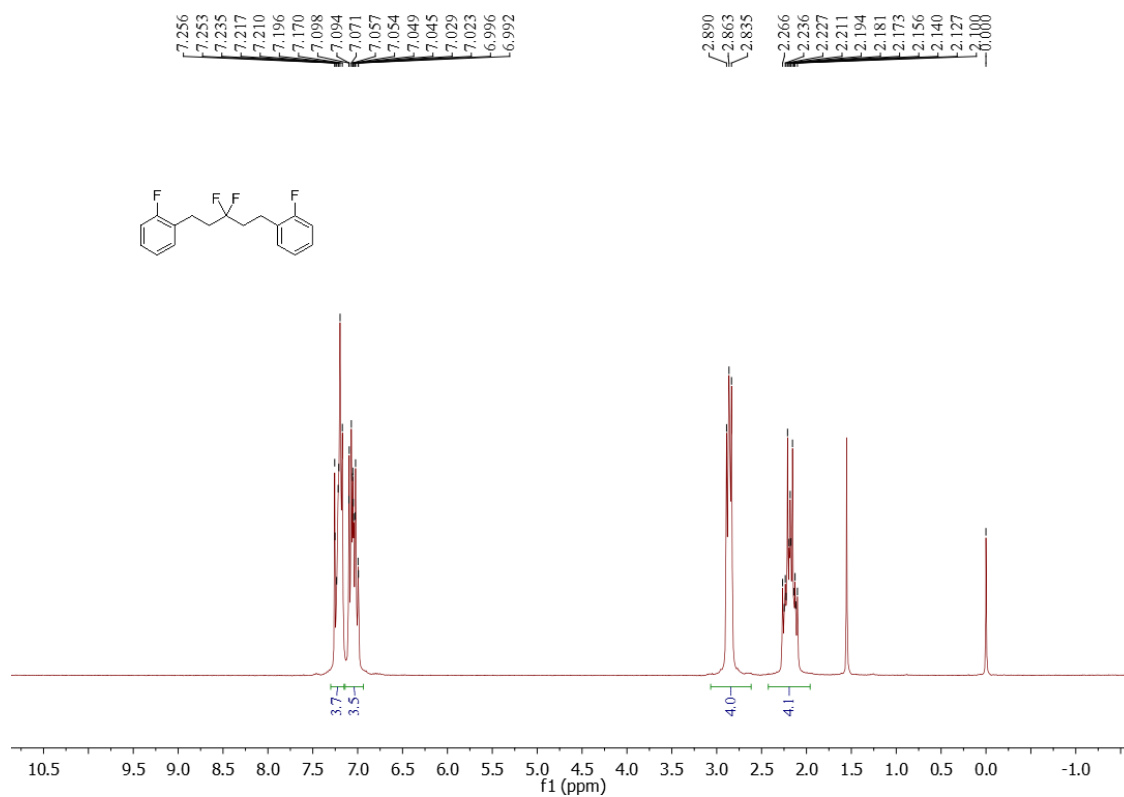

Figure S145.  $^{13}\text{C}$  NMR spectrum of unknown *gem*-difluoride **1i**, related to Figure 2

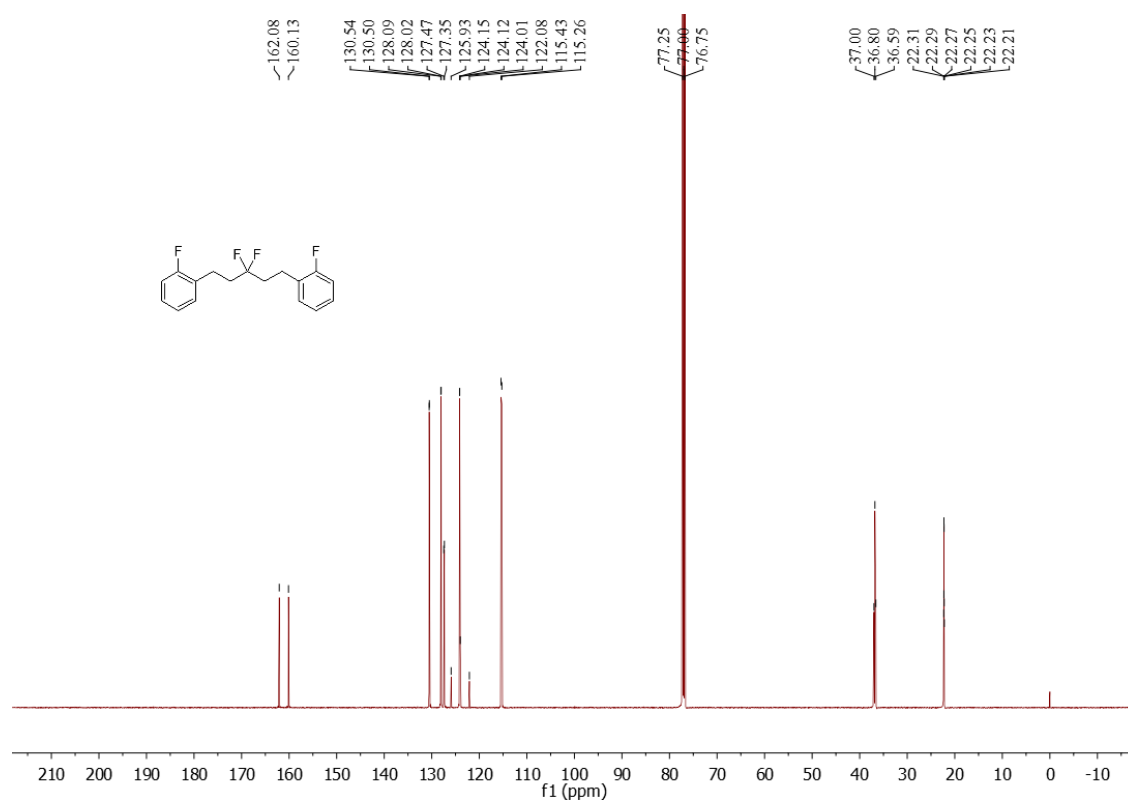

Figure S146.  $^{19}\text{F}$  NMR spectrum of unknown *gem*-difluoride **1i**, related to Figure 2

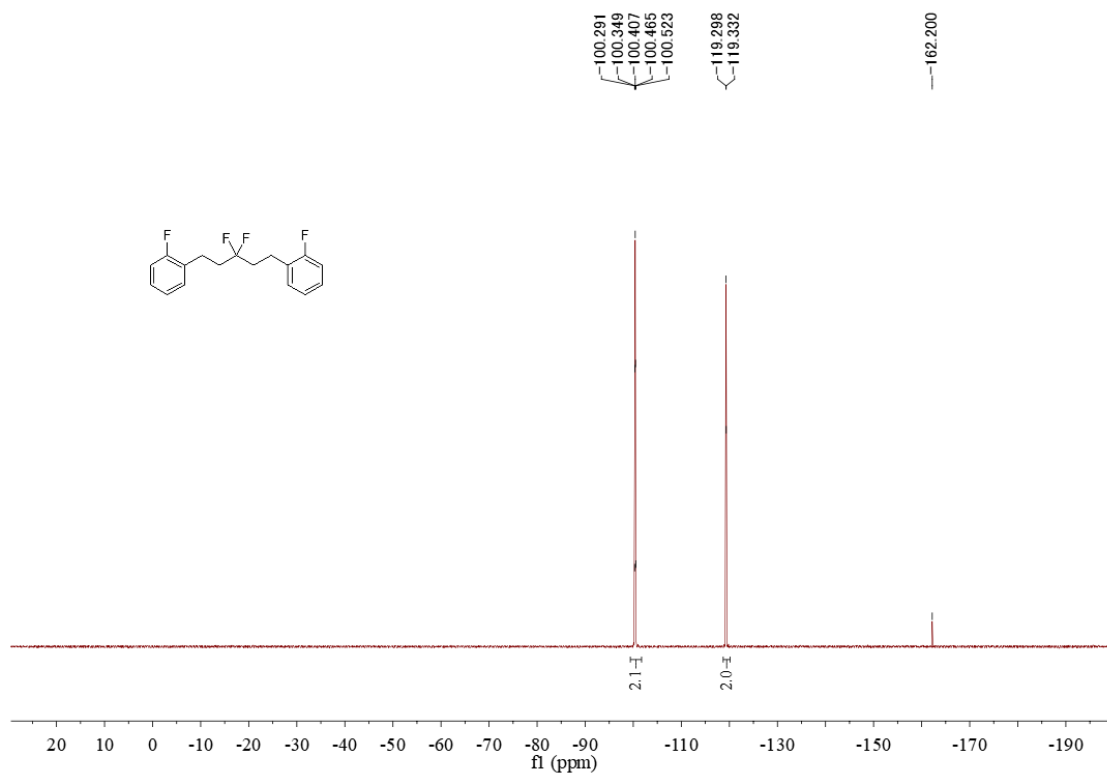

Figure S147. <sup>1</sup>H NMR spectrum of unknown *gem*-difluoride **1j**, related to Figure 2

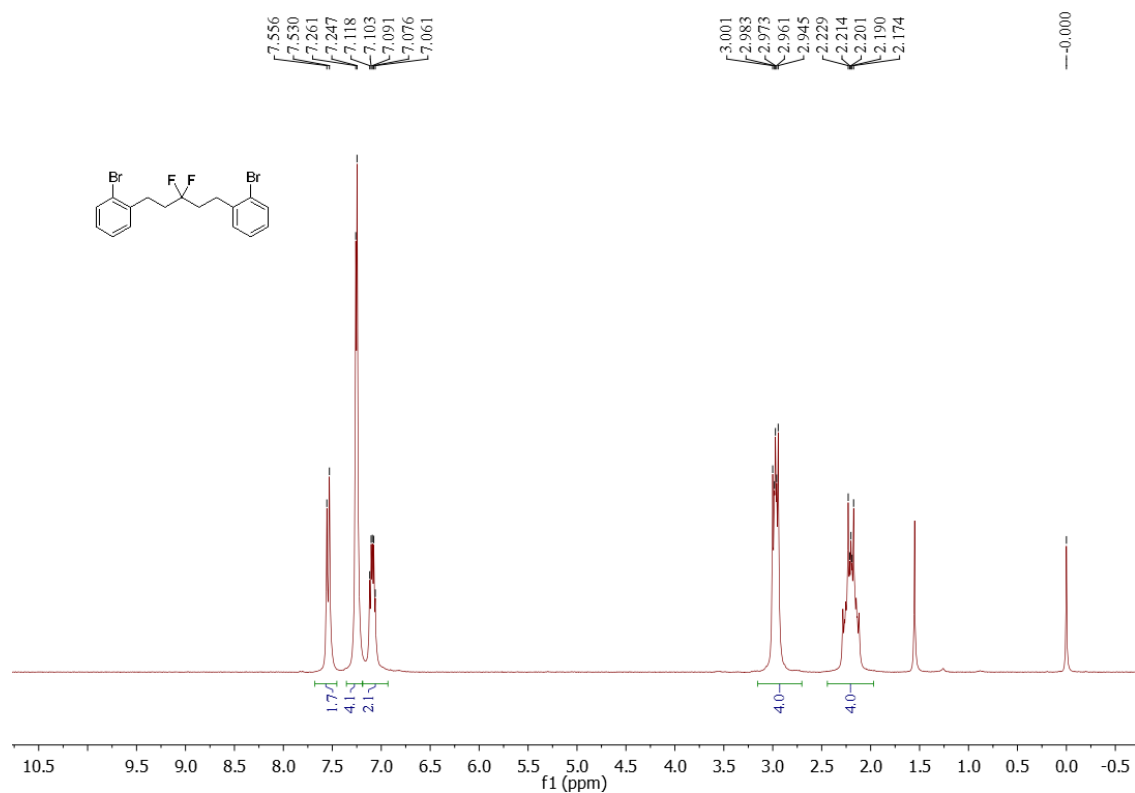

Figure S148. <sup>13</sup>C NMR spectrum of unknown *gem*-difluoride **1j**, related to Figure 2

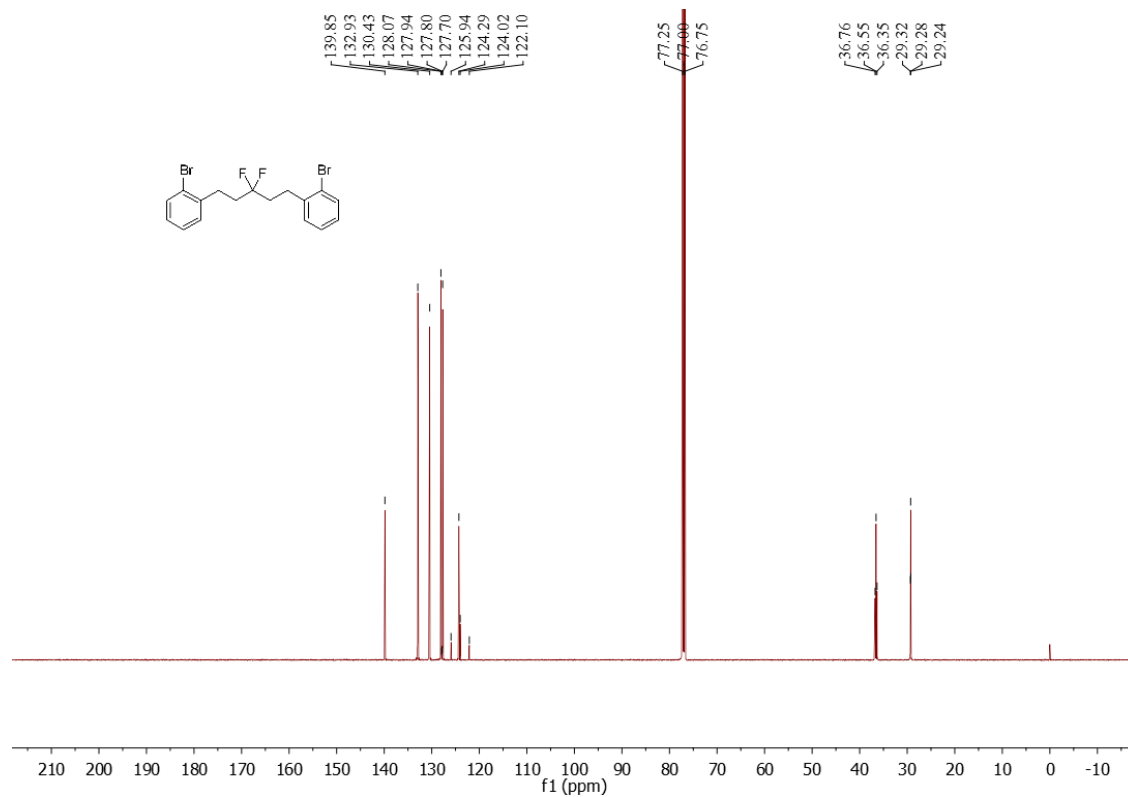

Figure S149.  $^{19}\text{F}$  NMR spectrum of unknown *gem*-difluoride **1j**, related to Figure 2

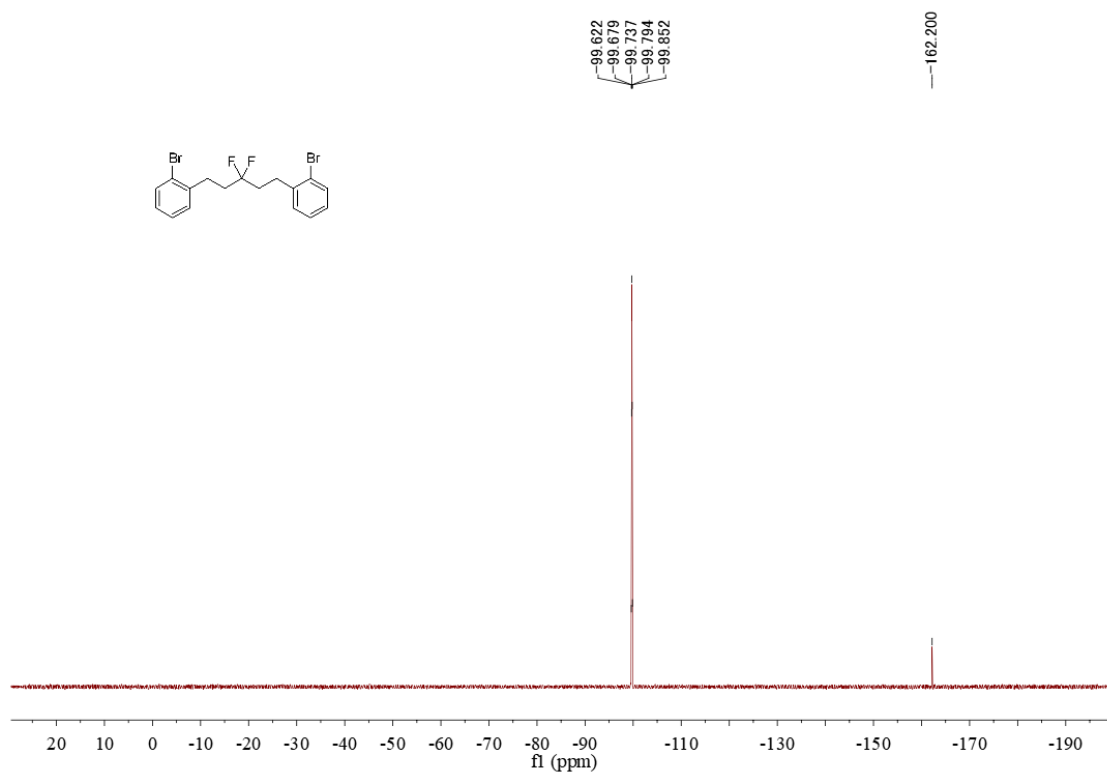

Figure S150.  $^1\text{H}$  NMR spectrum of unknown *gem*-difluoride **1k**, related to Figure 2

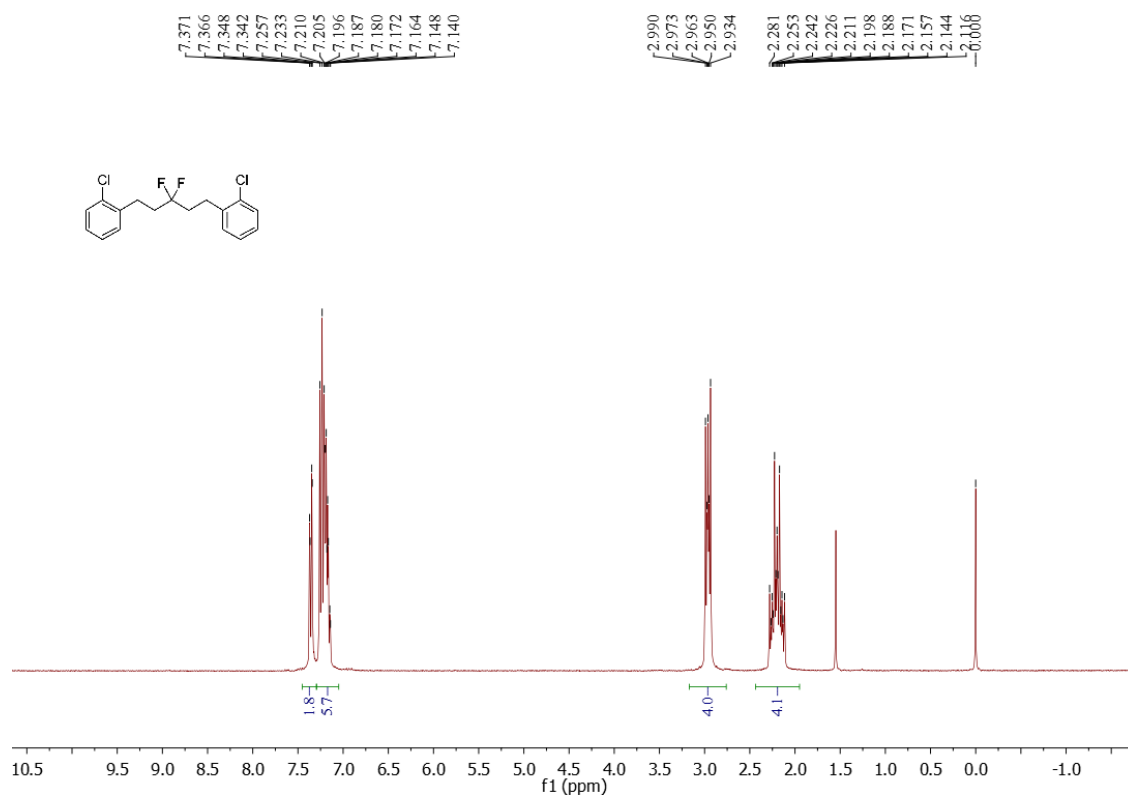

Figure S151.  $^{13}\text{C}$  NMR spectrum of unknown *gem*-difluoride **1k**, related to Figure 2

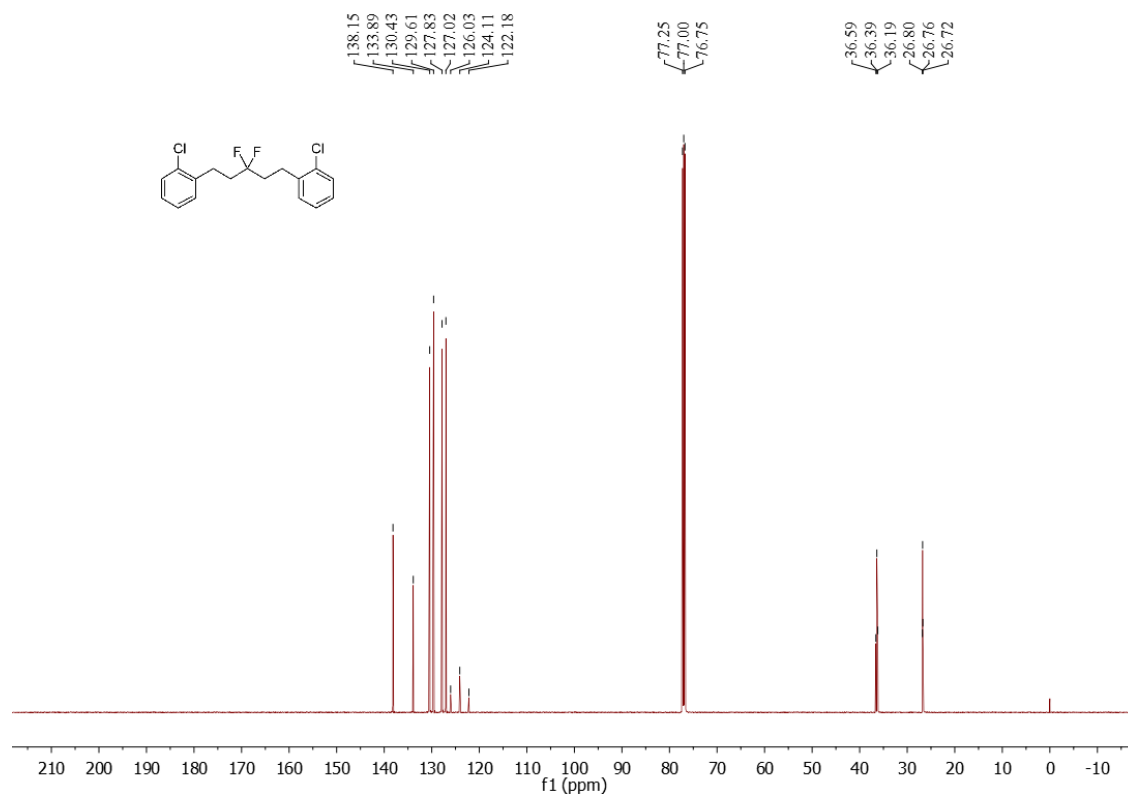

Figure S152.  $^{19}\text{F}$  NMR spectrum of unknown *gem*-difluoride **1k**, related to Figure 2

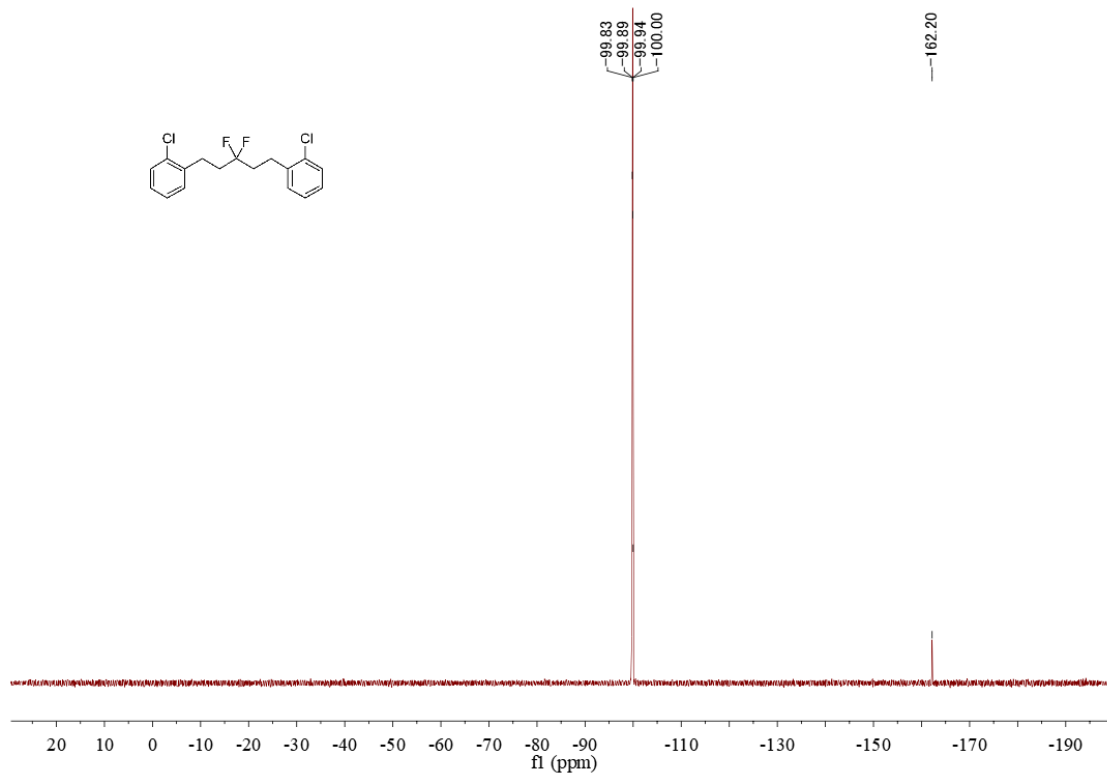

Figure S153. <sup>1</sup>H NMR spectrum of unknown *gem*-difluoride **11**, related to Figure 2

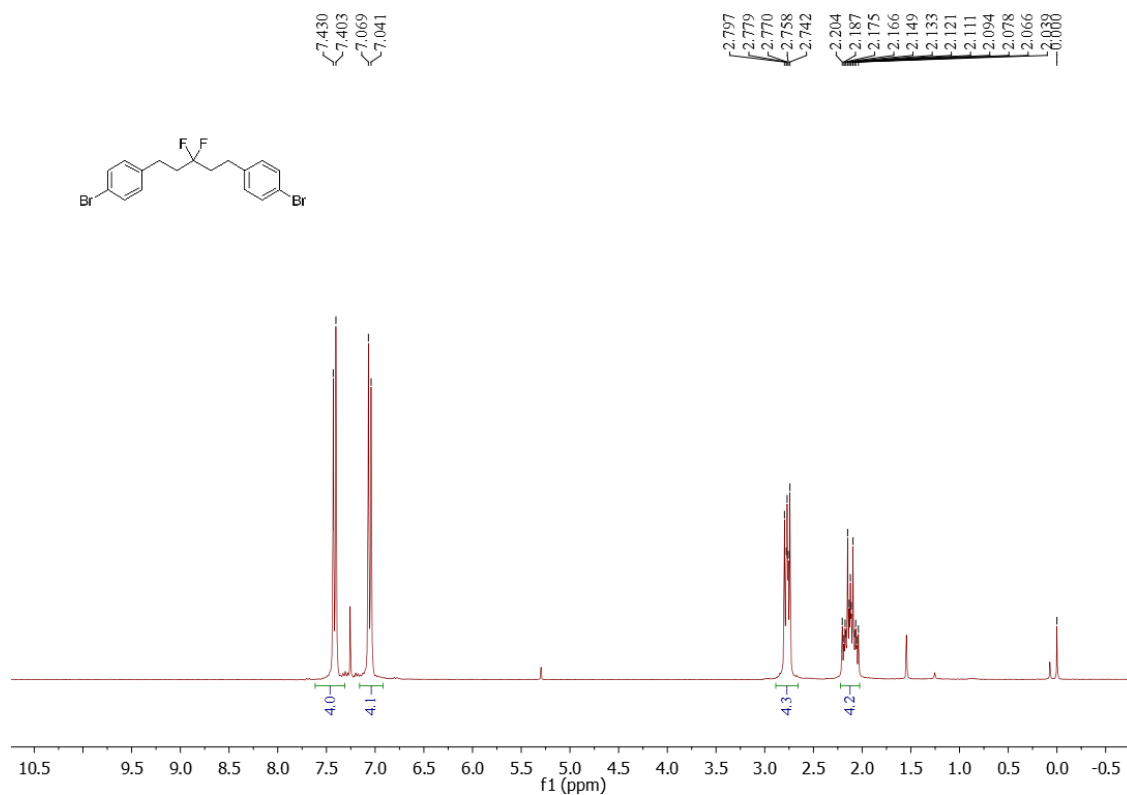

Figure S154. <sup>13</sup>C NMR spectrum of unknown *gem*-difluoride **11**, related to Figure 2

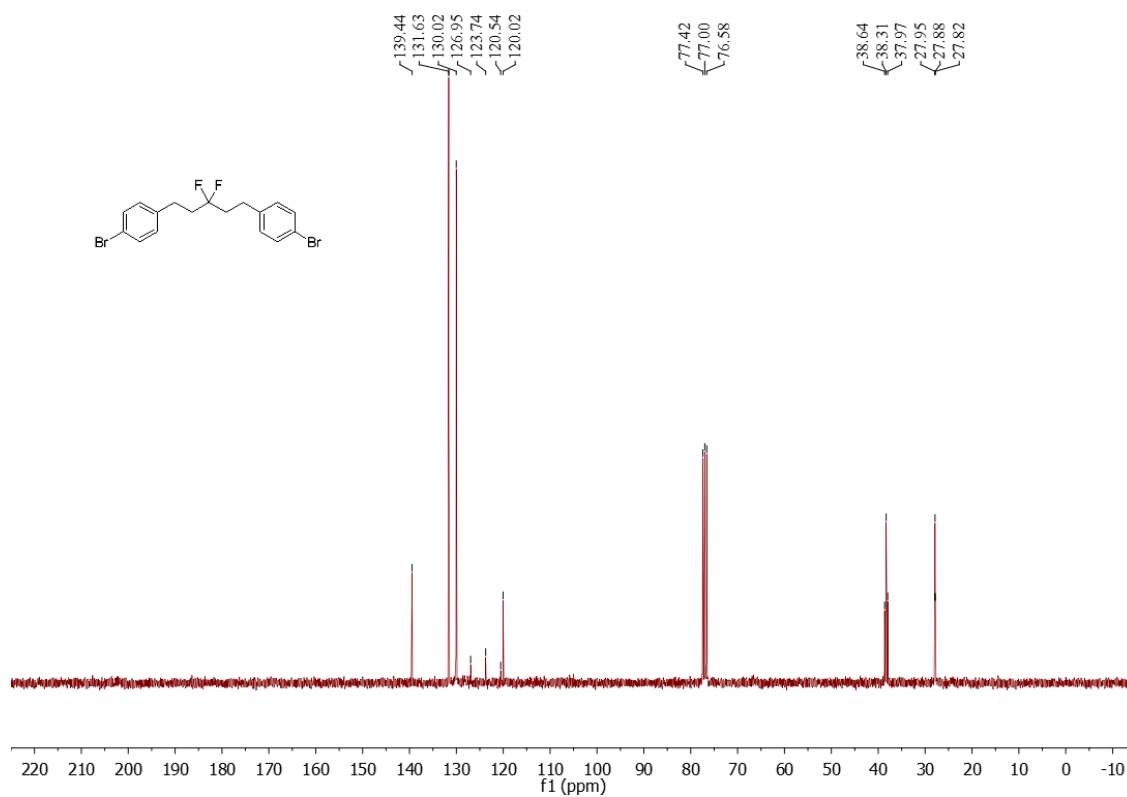

Figure S155.  $^{19}\text{F}$  NMR spectrum of unknown *gem*-difluoride **1l**, related to Figure 2

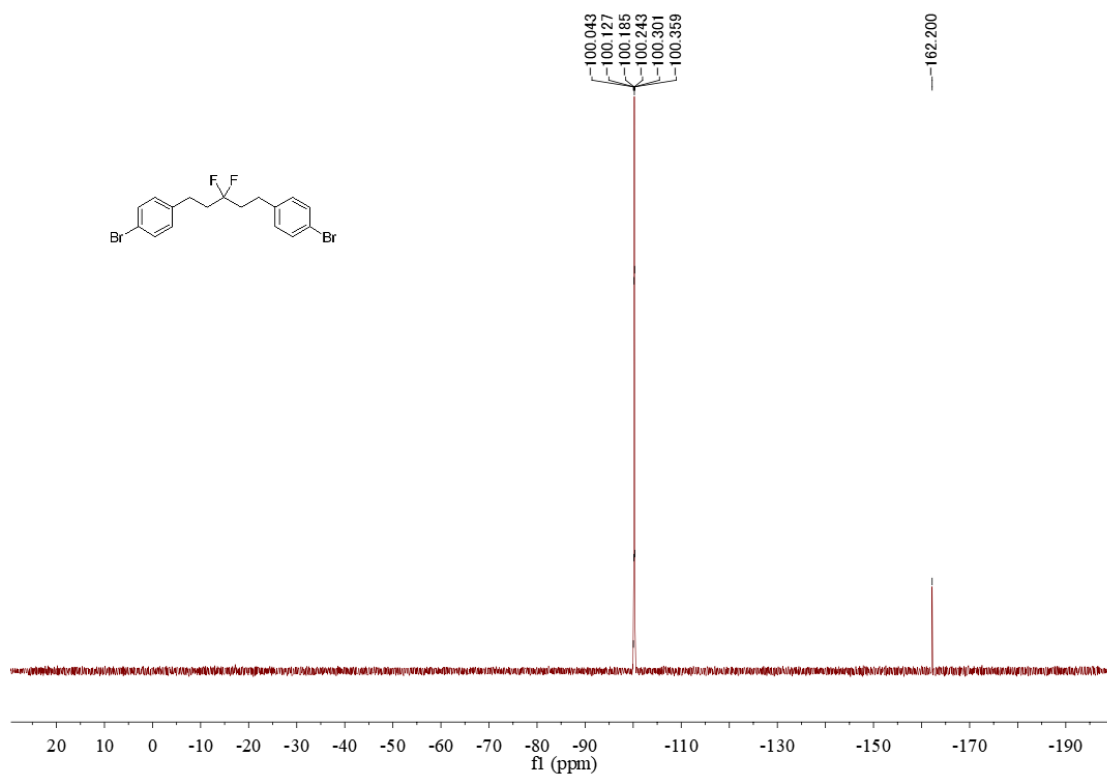

Figure S156.  $^1\text{H}$  NMR spectrum of unknown *gem*-difluoride **1m**, related to Figure 2

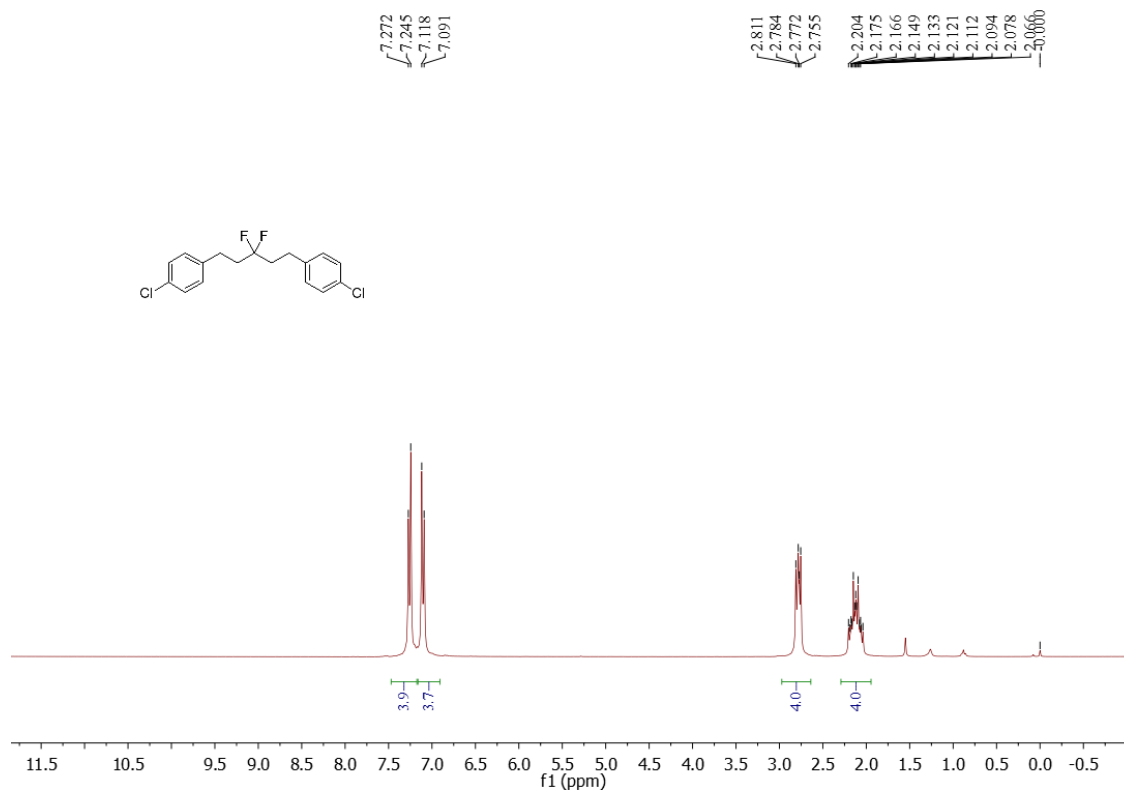



Figure S157.  $^{13}\text{C}$  NMR spectrum of unknown *gem*-difluoride **1m**, related to Figure 2

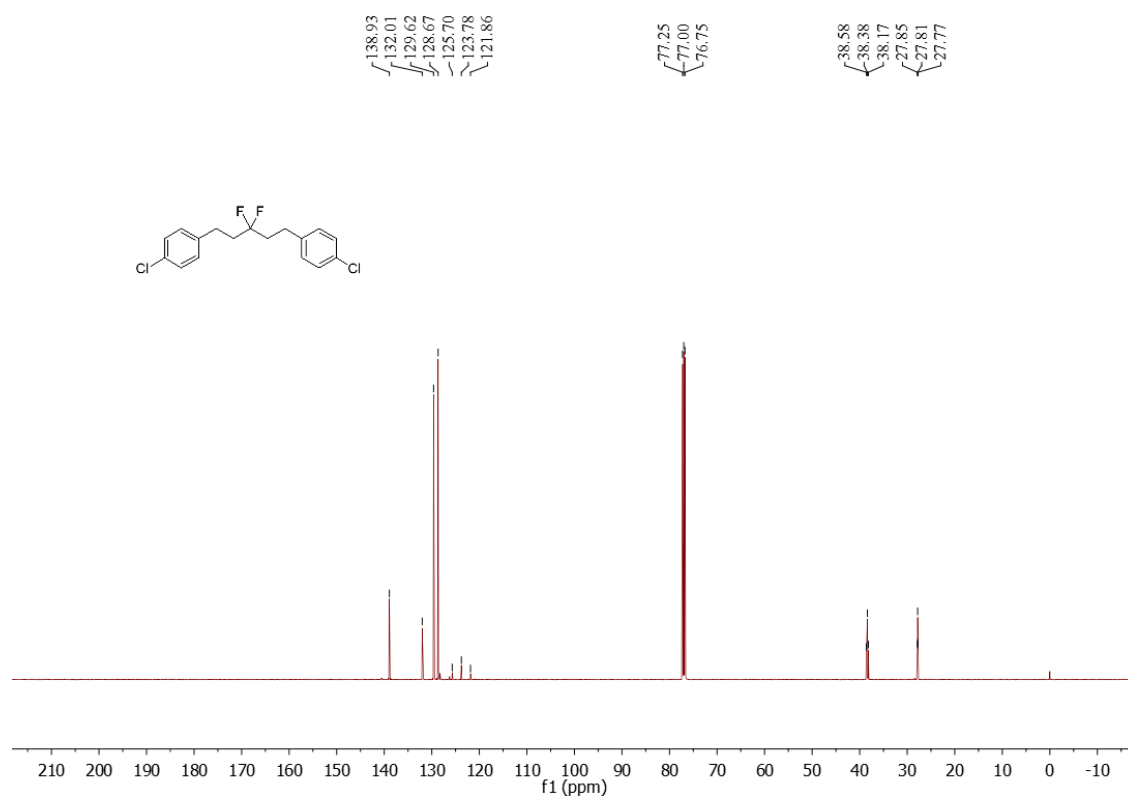

Figure S158.  $^{19}\text{F}$  NMR spectrum of unknown *gem*-difluoride **1m**, related to Figure 2

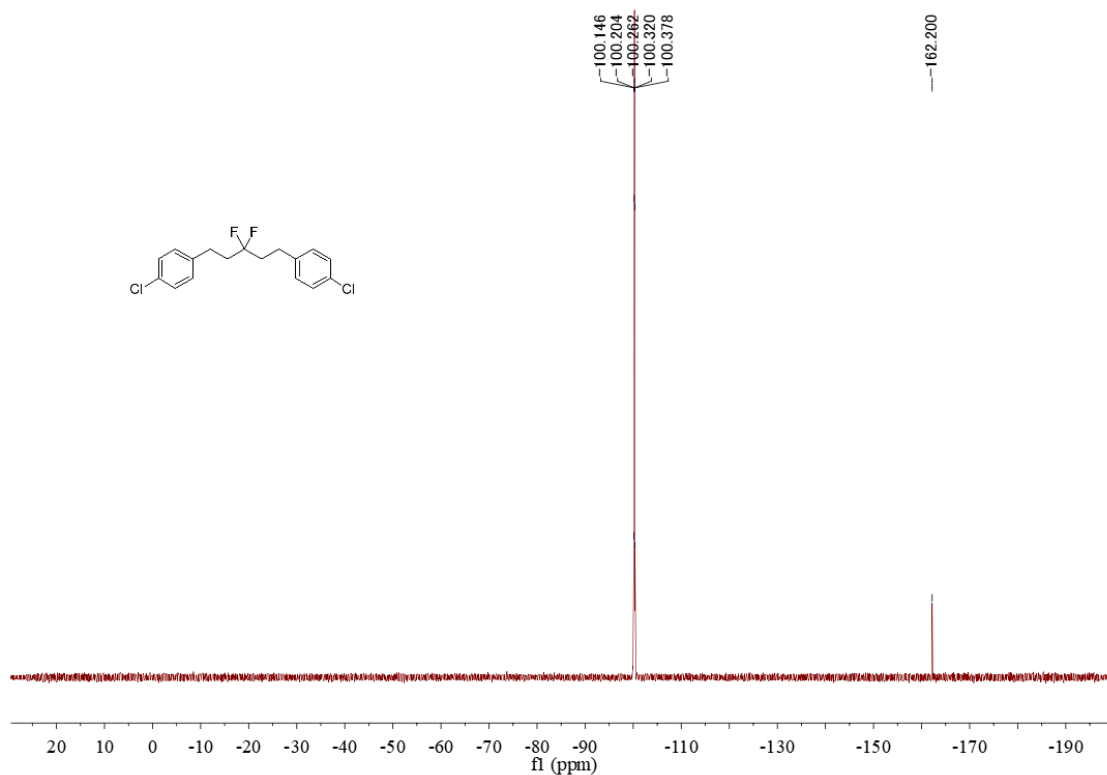

Figure S159. <sup>1</sup>H NMR spectrum of unknown *gem*-difluoride **1n**, related to Figure 2

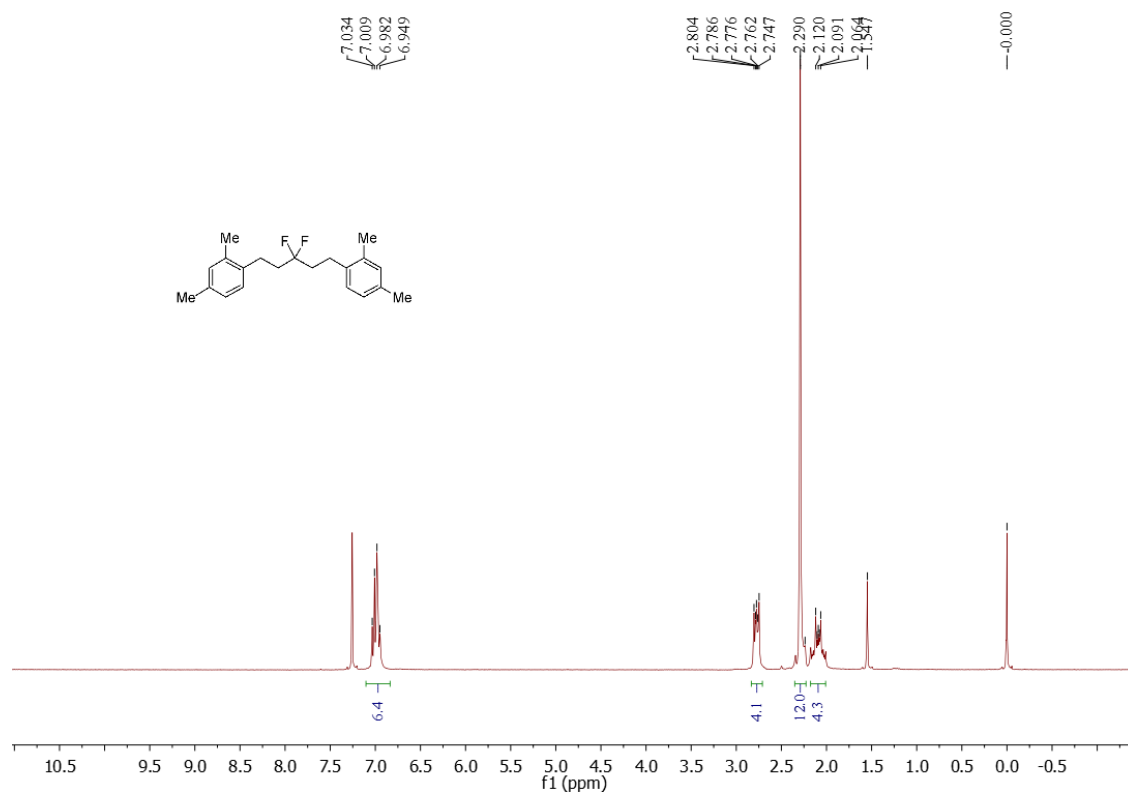

Figure S160. <sup>13</sup>C NMR spectrum of unknown *gem*-difluoride **1n**, related to Figure 2

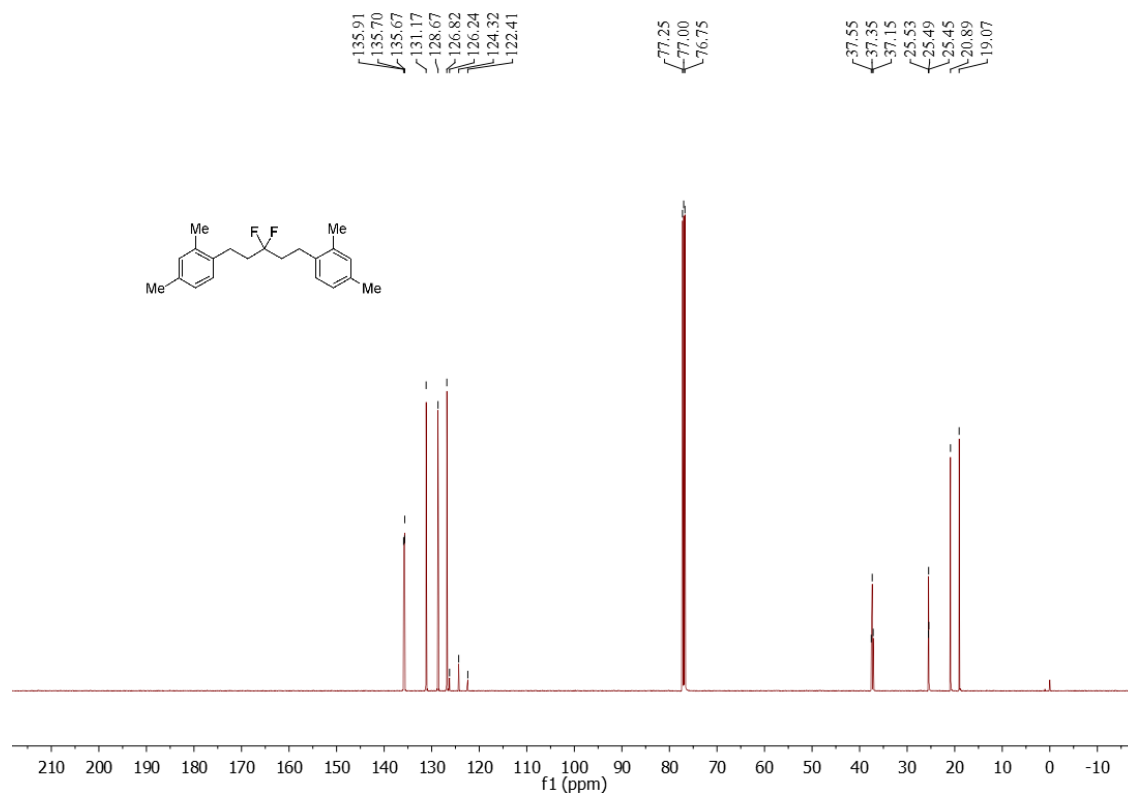

Figure S161.  $^{19}\text{F}$  NMR spectrum of unknown *gem*-difluoride **1n**, related to Figure 2

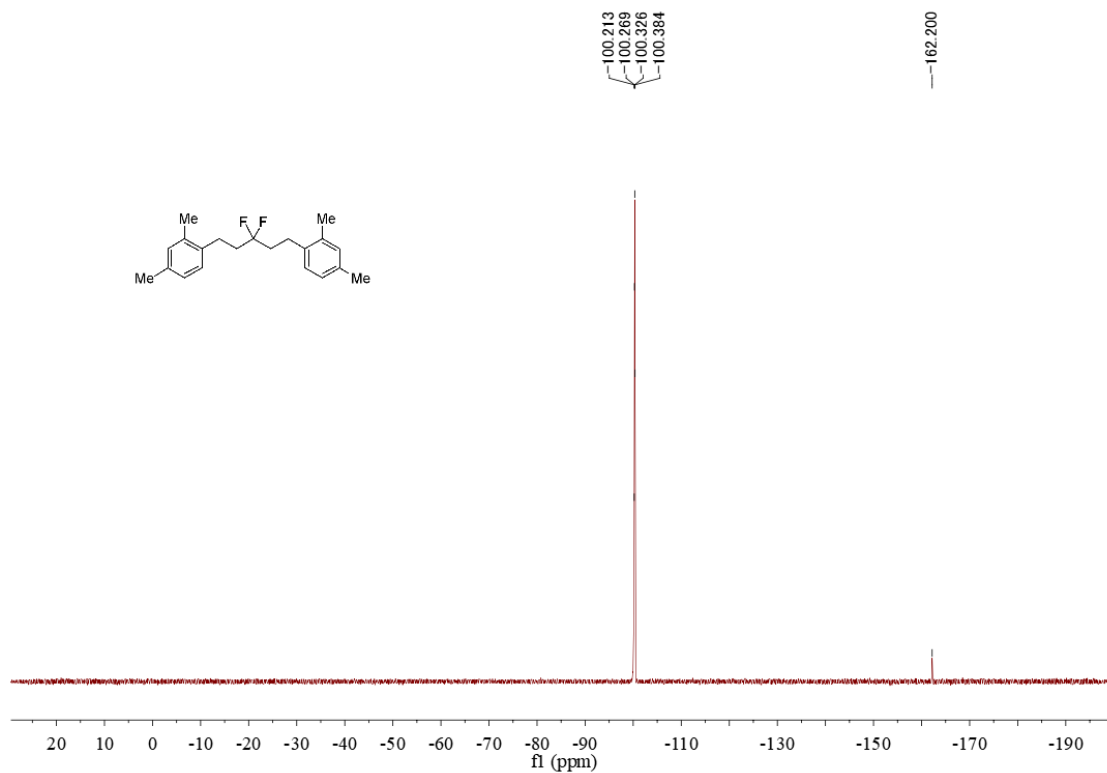

Figure S162.  $^1\text{H}$  NMR spectrum of unknown *gem*-difluoride **1o**, related to Figure 2

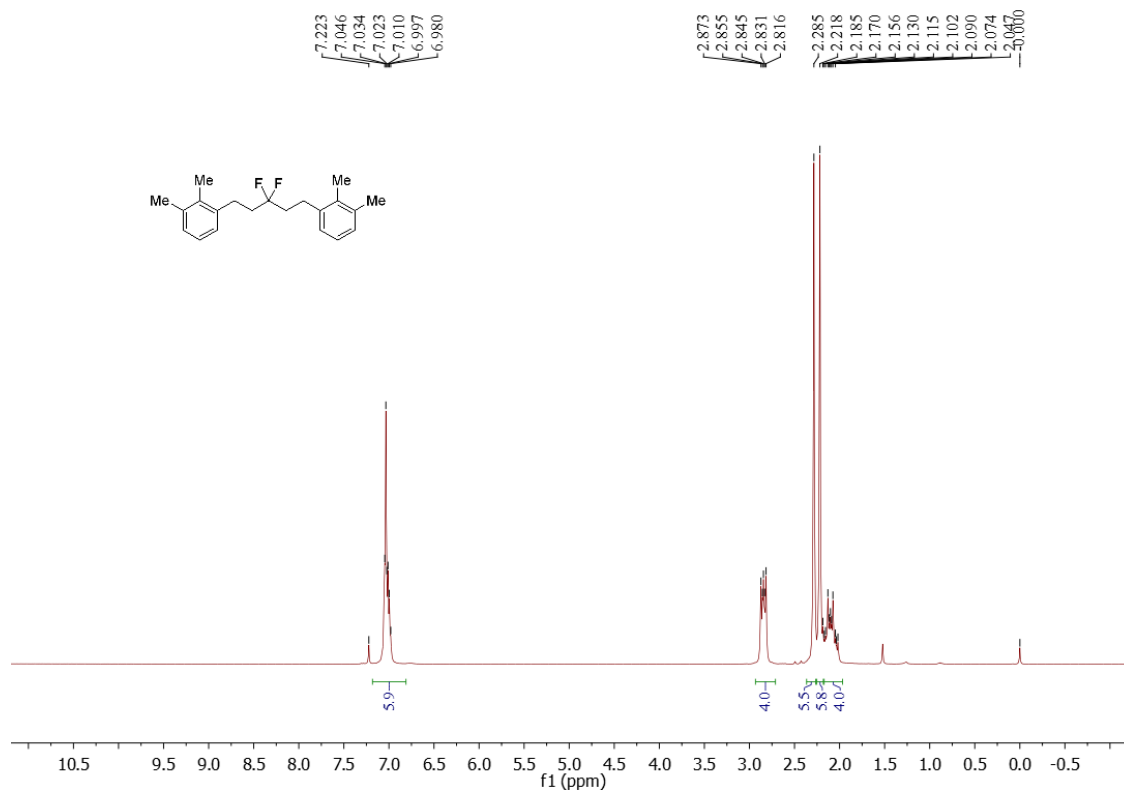

Figure S163.  $^{13}\text{C}$  NMR spectrum of unknown *gem*-difluoride **1o**, related to Figure 2

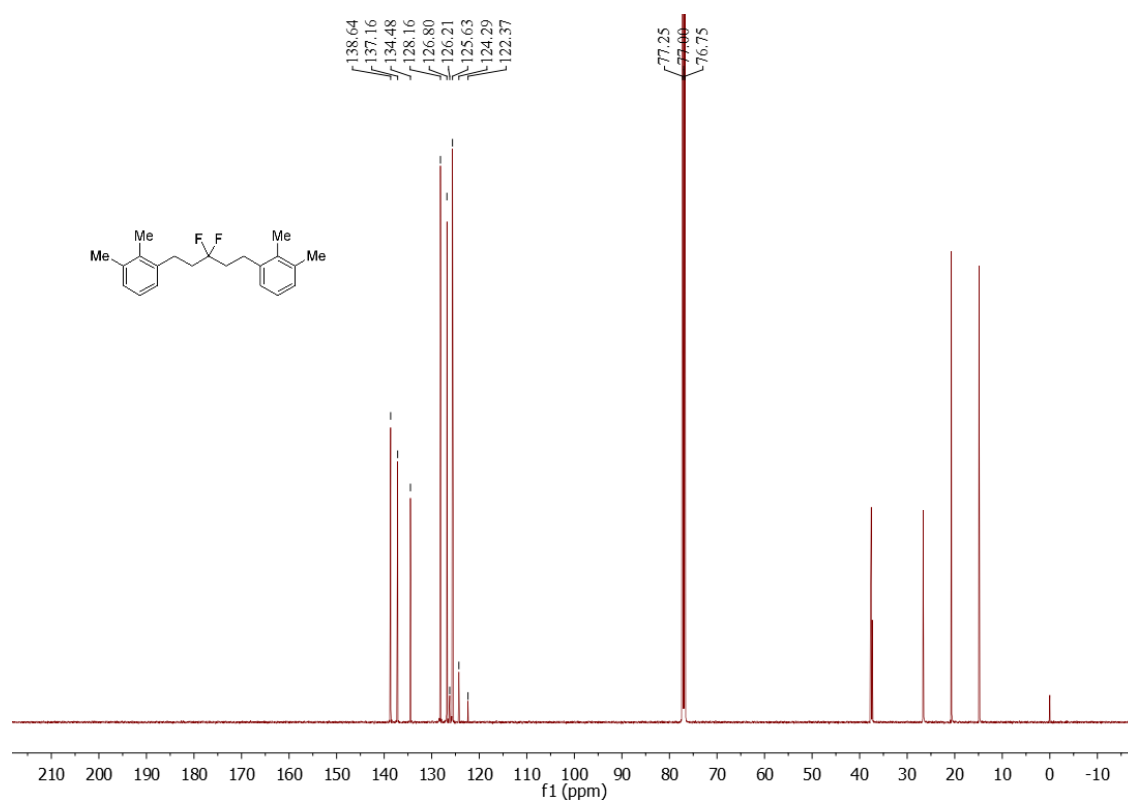

Figure S164.  $^{19}\text{F}$  NMR spectrum of unknown *gem*-difluoride **1o**, related to Figure 2

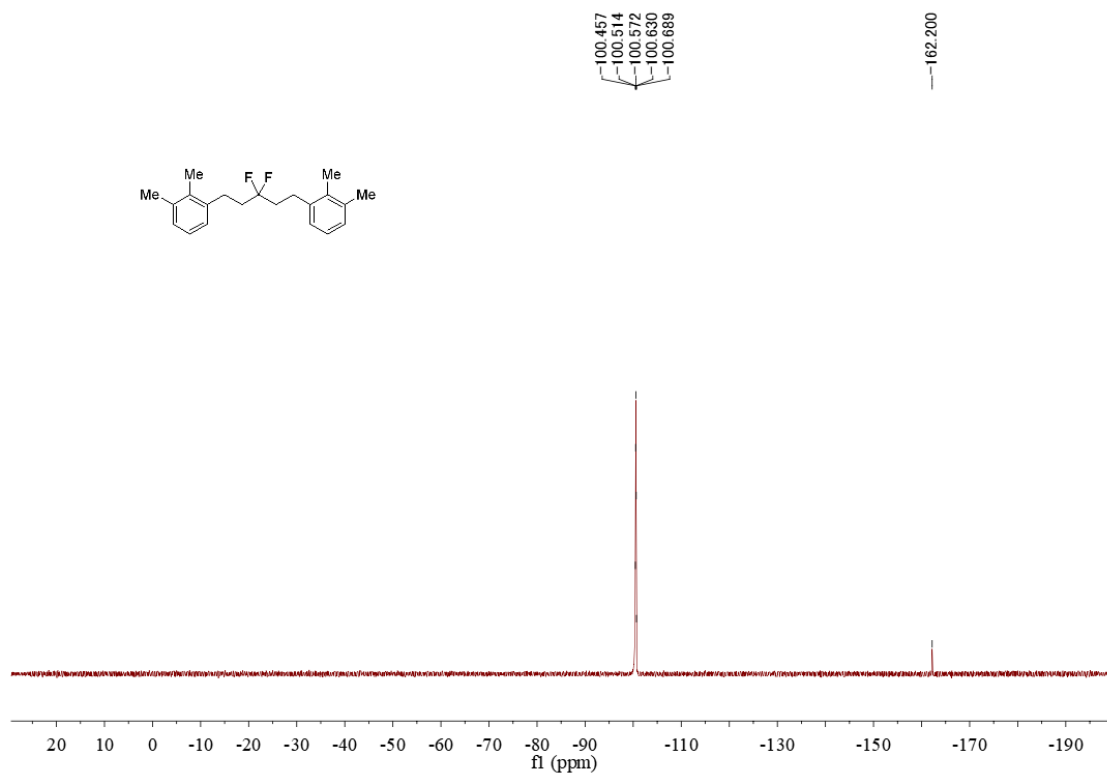

Figure S165. <sup>1</sup>H NMR spectrum of unknown *gem*-difluoride **1p**, related to Figure 2

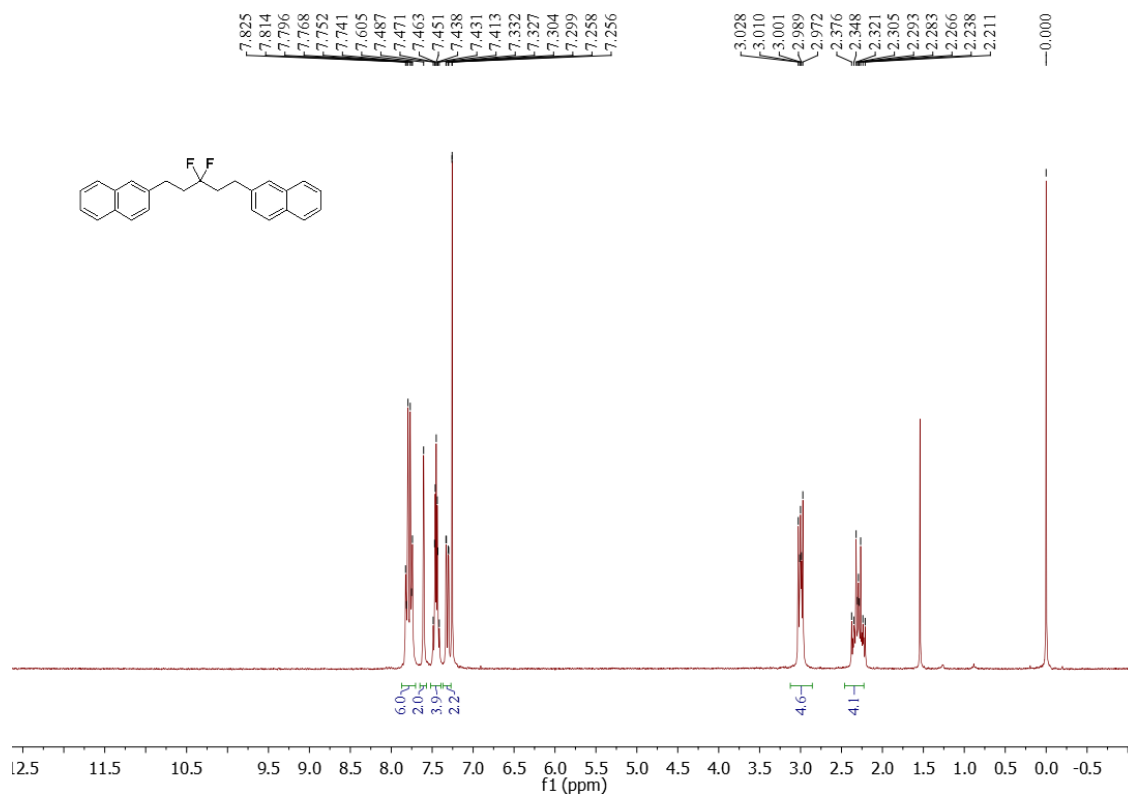

Figure S166. <sup>13</sup>C NMR spectrum of unknown *gem*-difluoride **1p**, related to Figure 2

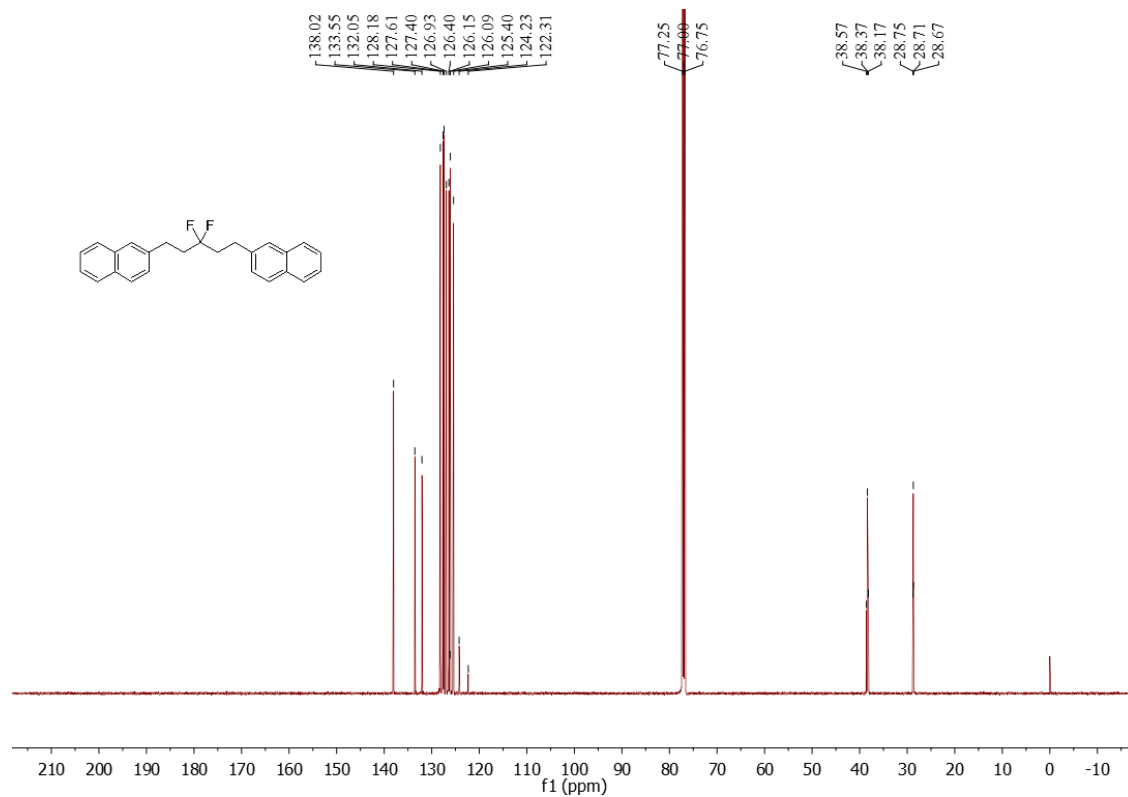

Figure S167.  $^{19}\text{F}$  NMR spectrum of unknown *gem*-difluoride **1p**, related to Figure 2

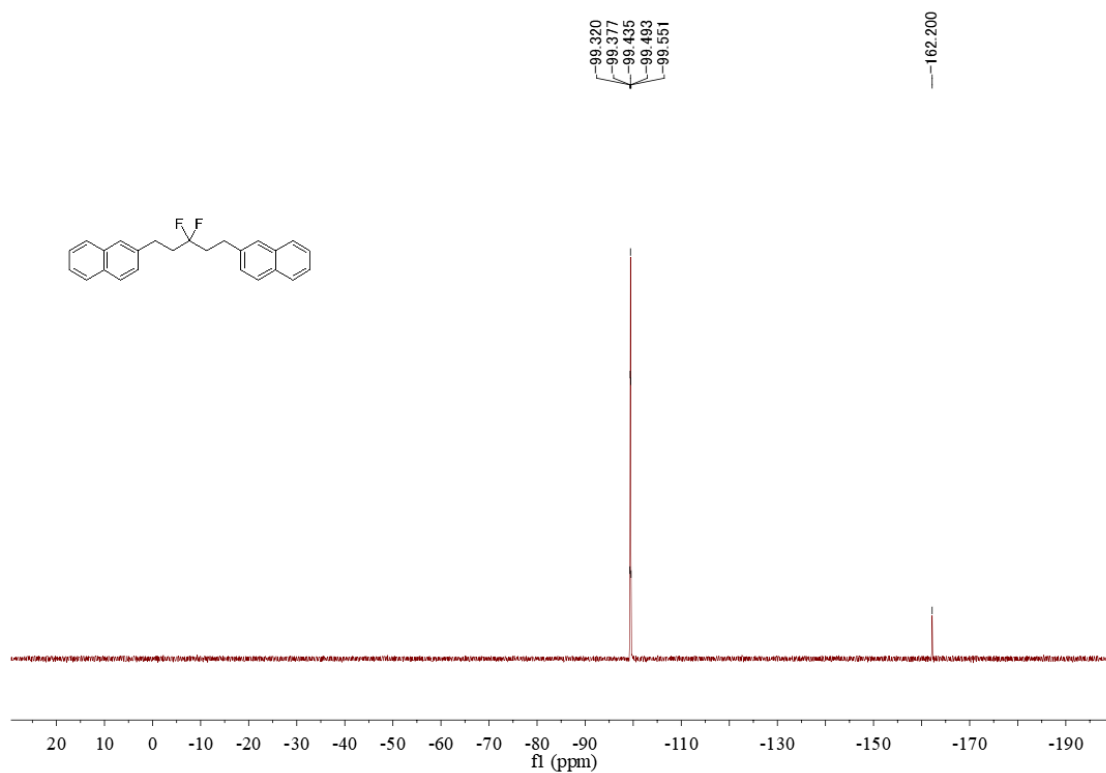

Figure S168.  $^1\text{H}$  NMR spectrum of unknown *gem*-difluoride **1q**, related to Figure 2

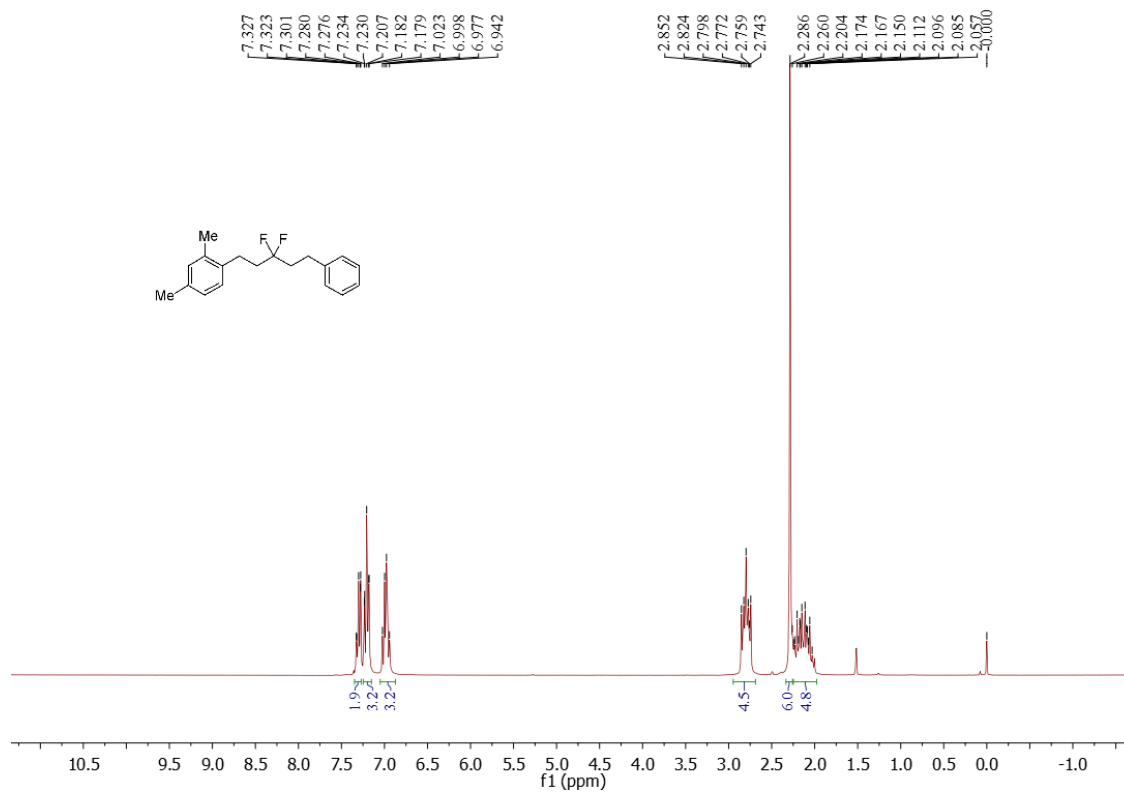

Figure S169.  $^{13}\text{C}$  NMR spectrum of unknown *gem*-difluoride **1q**, related to Figure 2

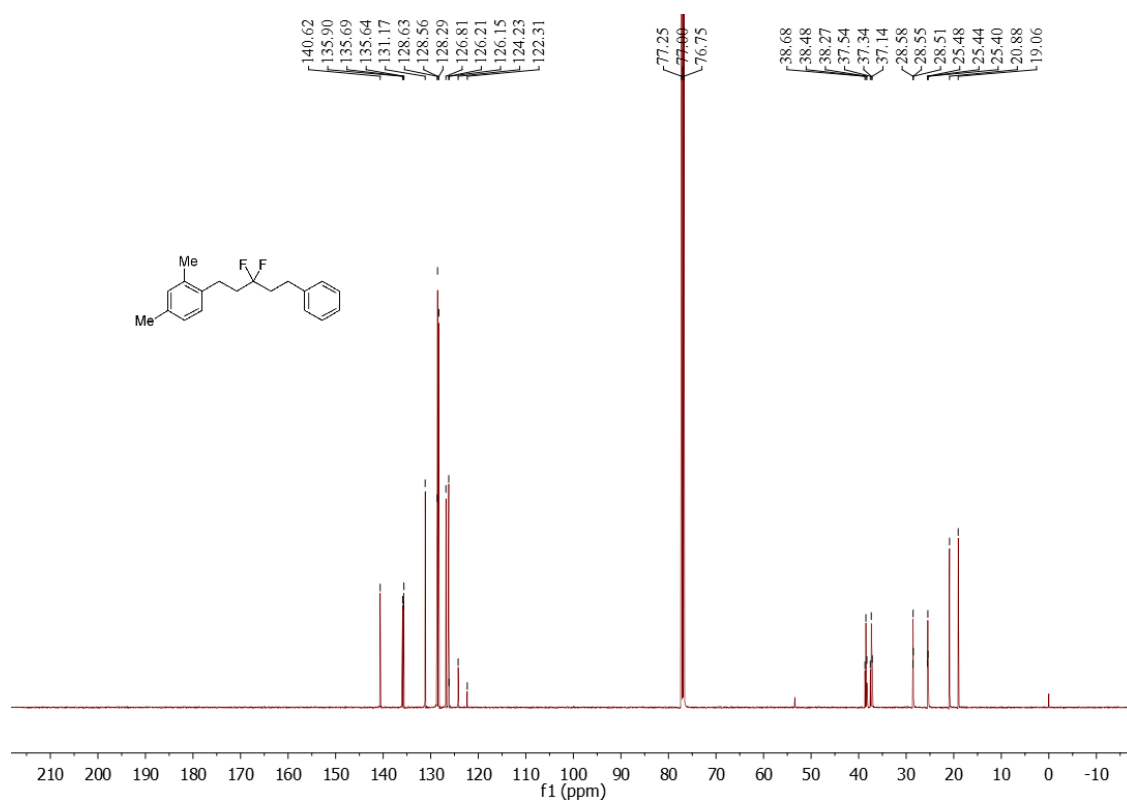

Figure S170.  $^{19}\text{F}$  NMR spectrum of unknown *gem*-difluoride **1q**, related to Figure 2

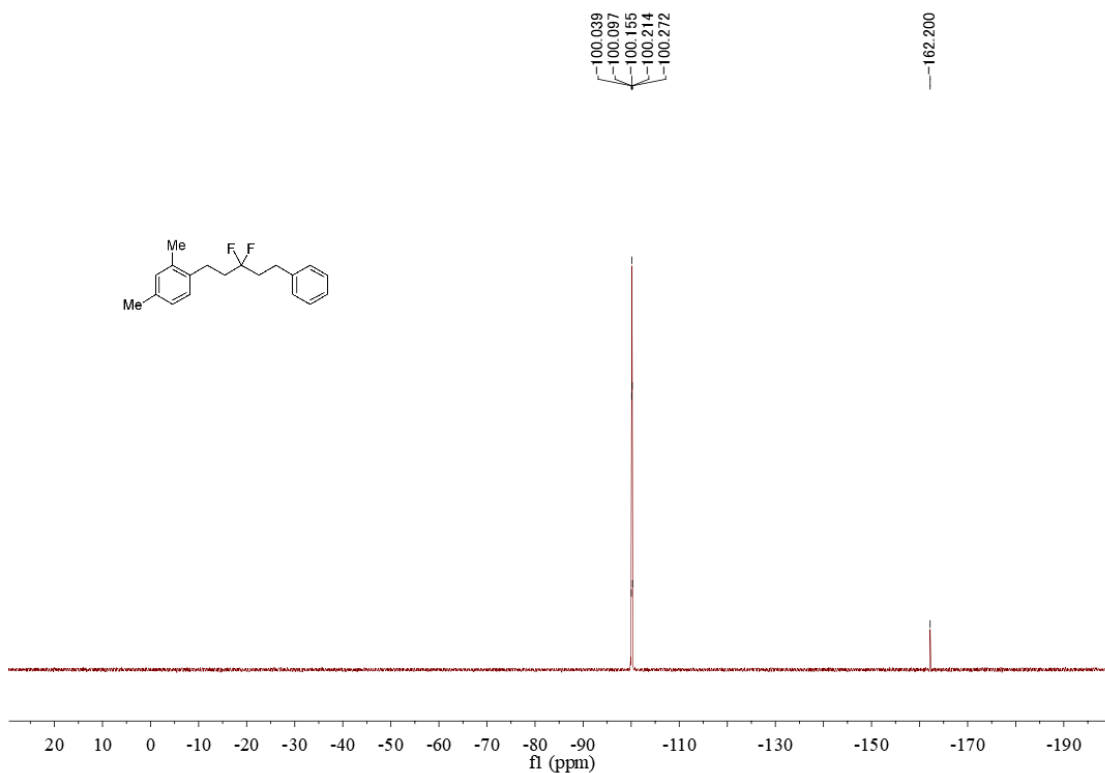

Figure S171. <sup>1</sup>H NMR spectrum of unknown *gem*-difluoride **1r**, related to **Figure 2**

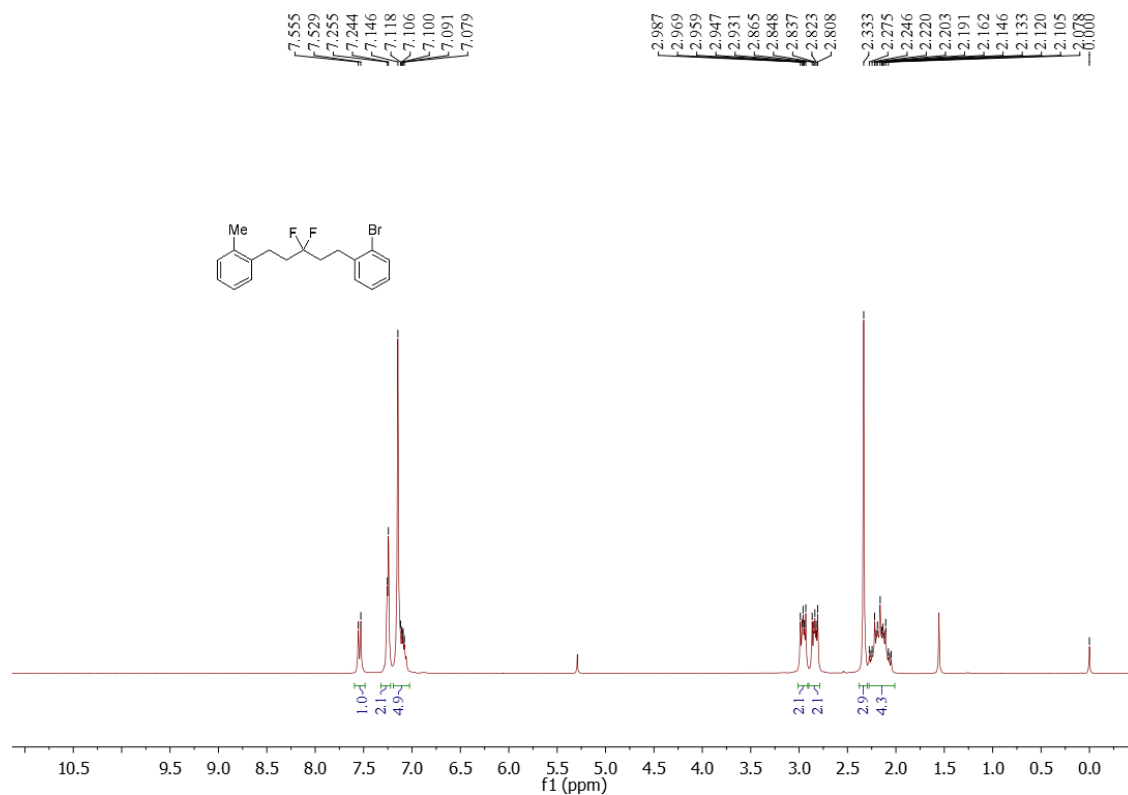

Figure S172. <sup>13</sup>C NMR spectrum of unknown *gem*-difluoride **1r**, related to **Figure 2**

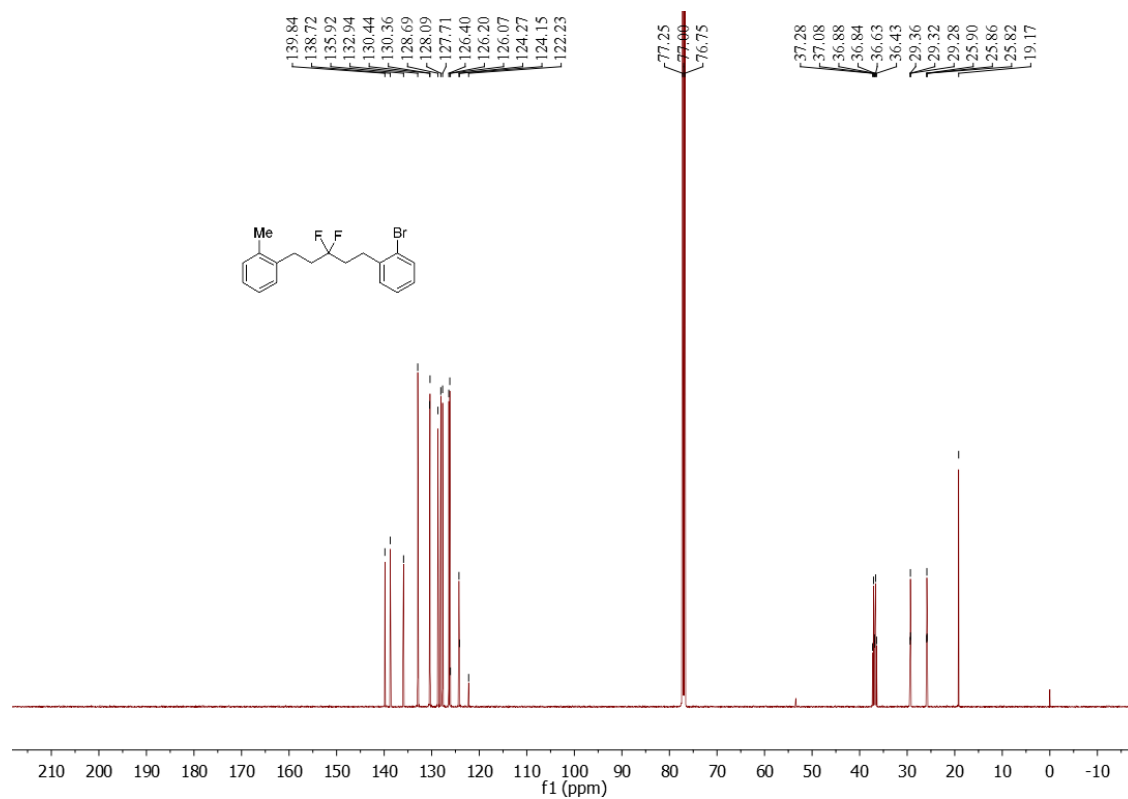



Figure S173.  $^{19}\text{F}$  NMR spectrum of unknown *gem*-difluoride **1r**, related to Figure 2

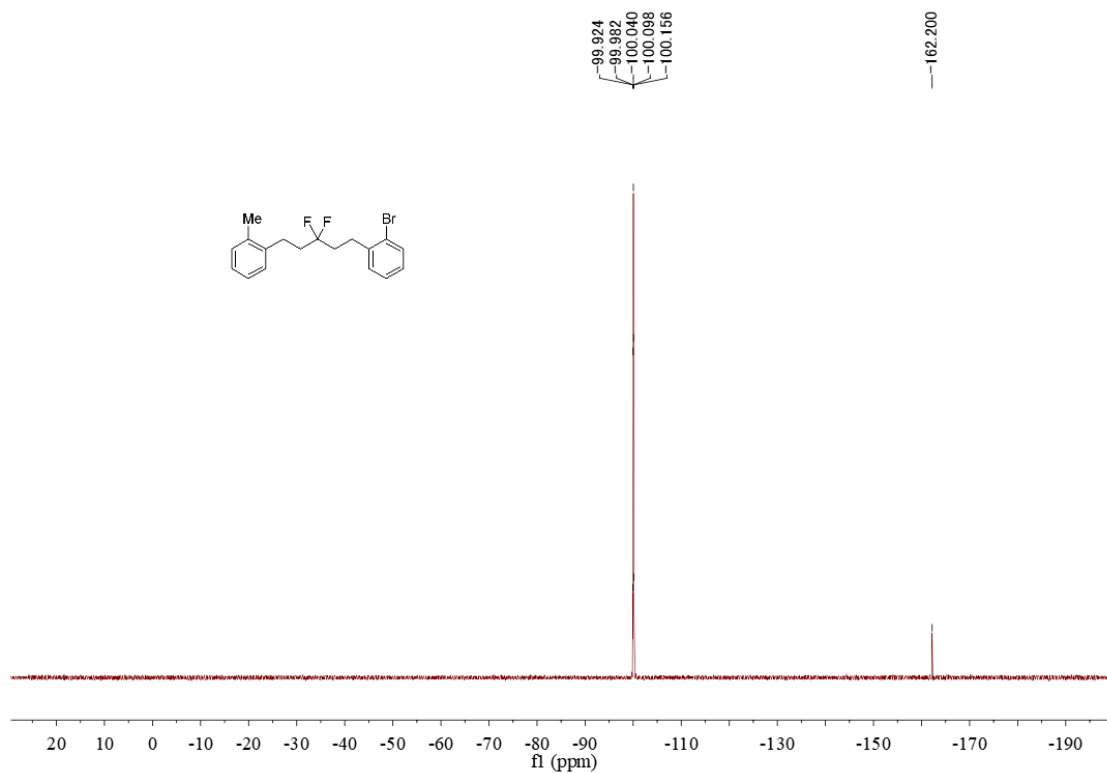

Figure S174.  $^1\text{H}$  NMR spectrum of unknown *gem*-difluoride **1s**, related to Figure 2

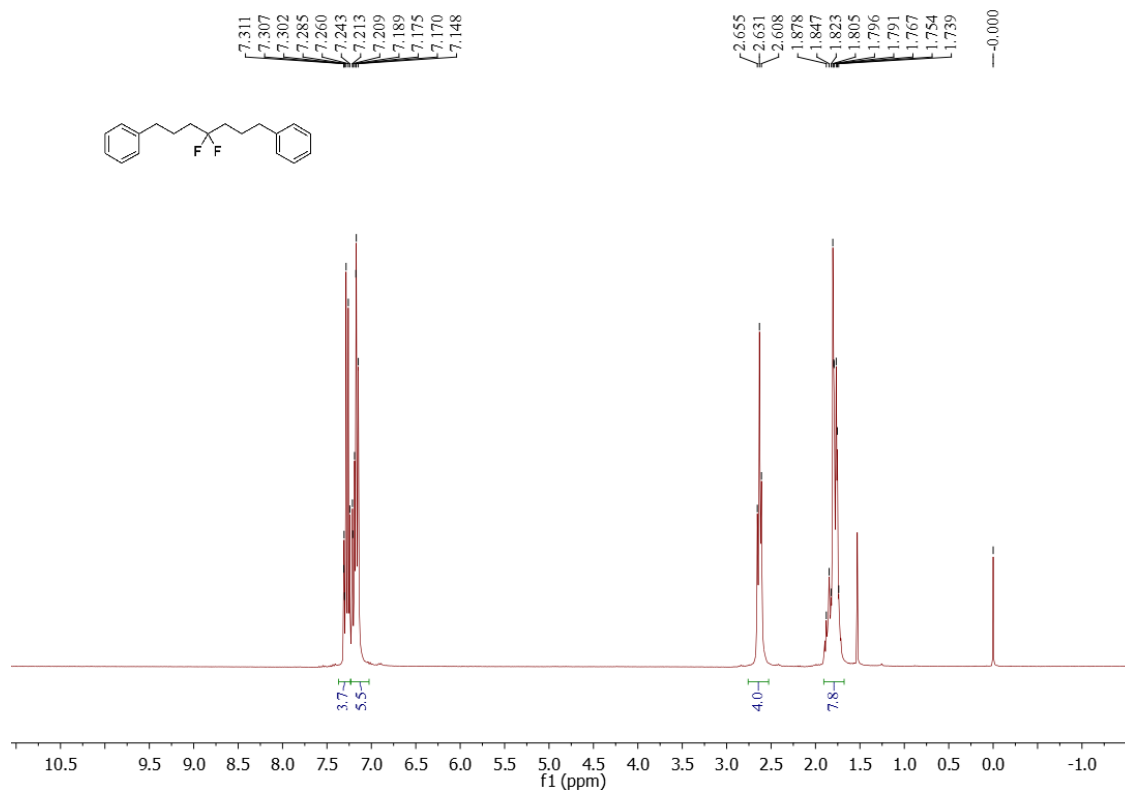

Figure S175.  $^{13}\text{C}$  NMR spectrum of unknown *gem*-difluoride **1s**, related to Figure 2

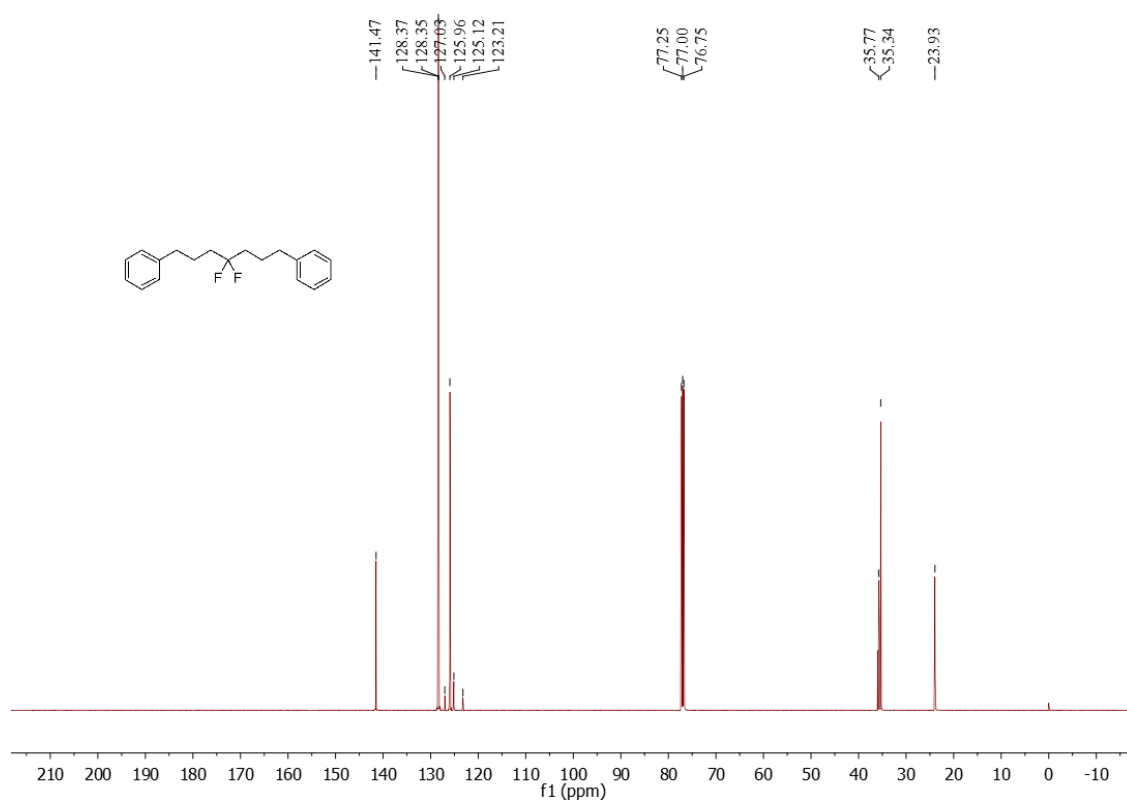

Figure S176.  $^{19}\text{F}$  NMR spectrum of unknown *gem*-difluoride **1s**, related to Figure 2

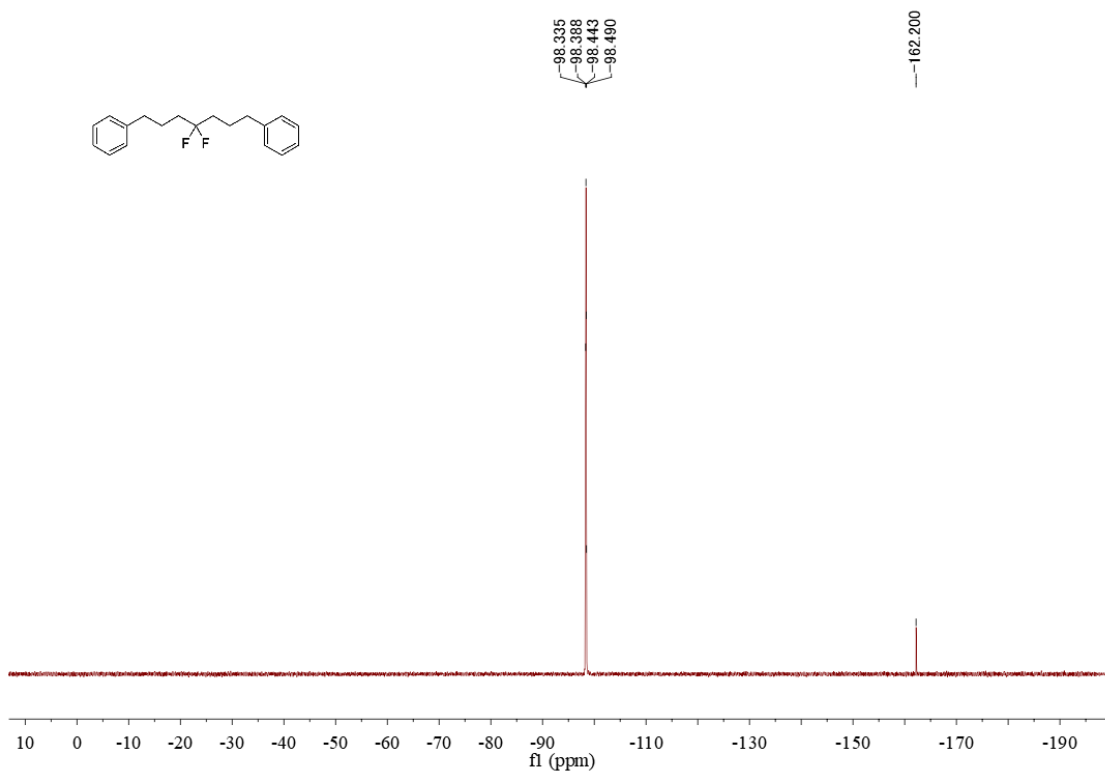

Figure S177. <sup>1</sup>H NMR spectrum of unknown *gem*-difluoride **1t**, related to Figure 2

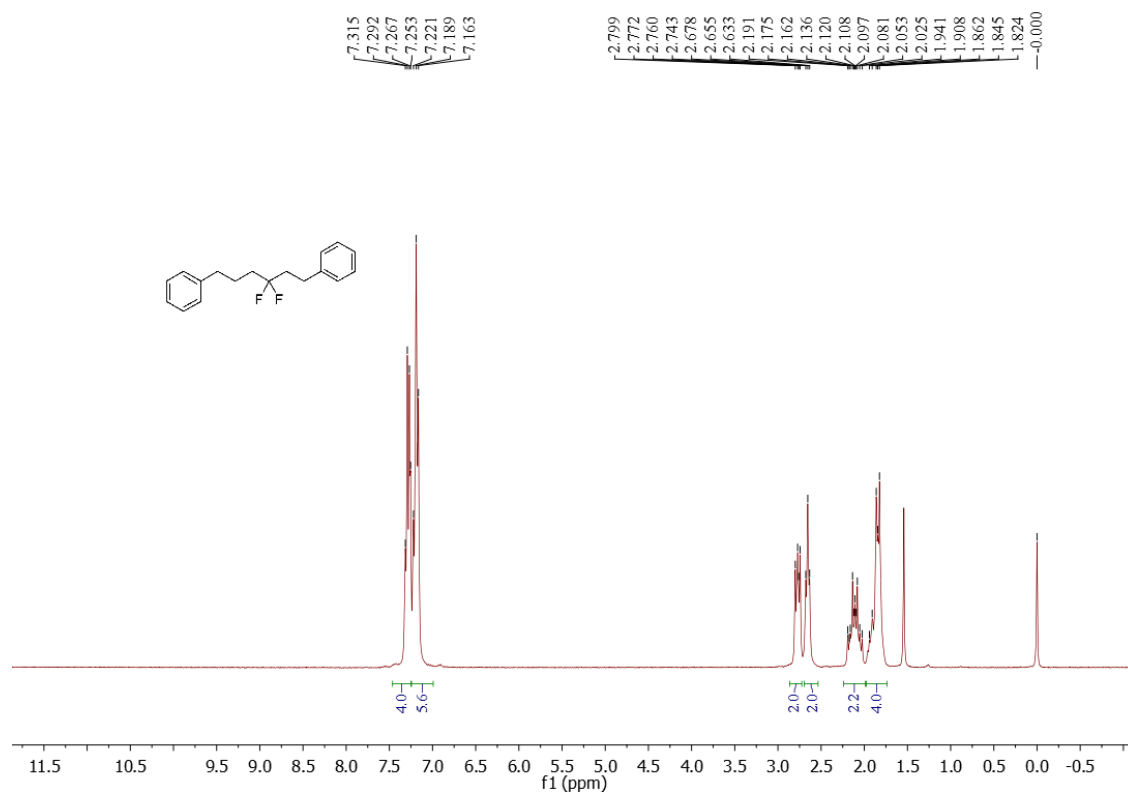

Figure S178. <sup>13</sup>C NMR spectrum of unknown *gem*-difluoride **1t**, related to Figure 2

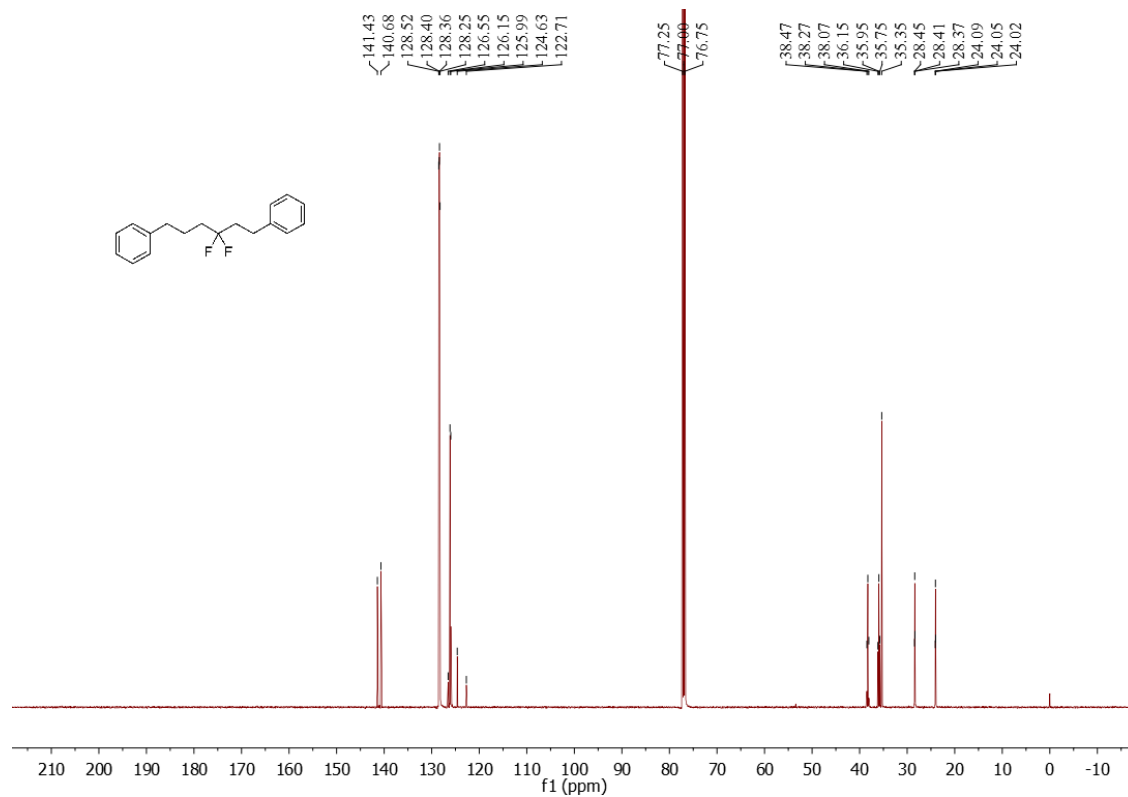

Figure S179.  $^{19}\text{F}$  NMR spectrum of unknown *gem*-difluoride **1t**, related to Figure 2

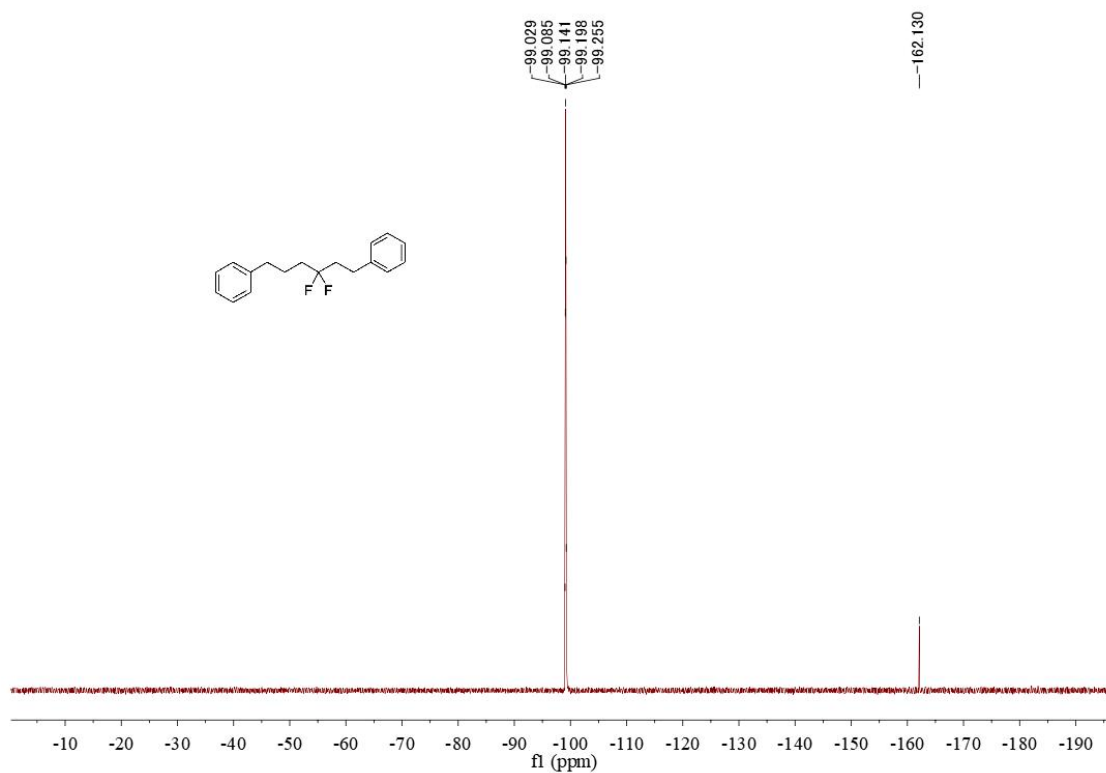

Figure S180.  $^1\text{H}$  NMR spectrum of unknown *gem*-difluoride **1u**, related to Figure 2

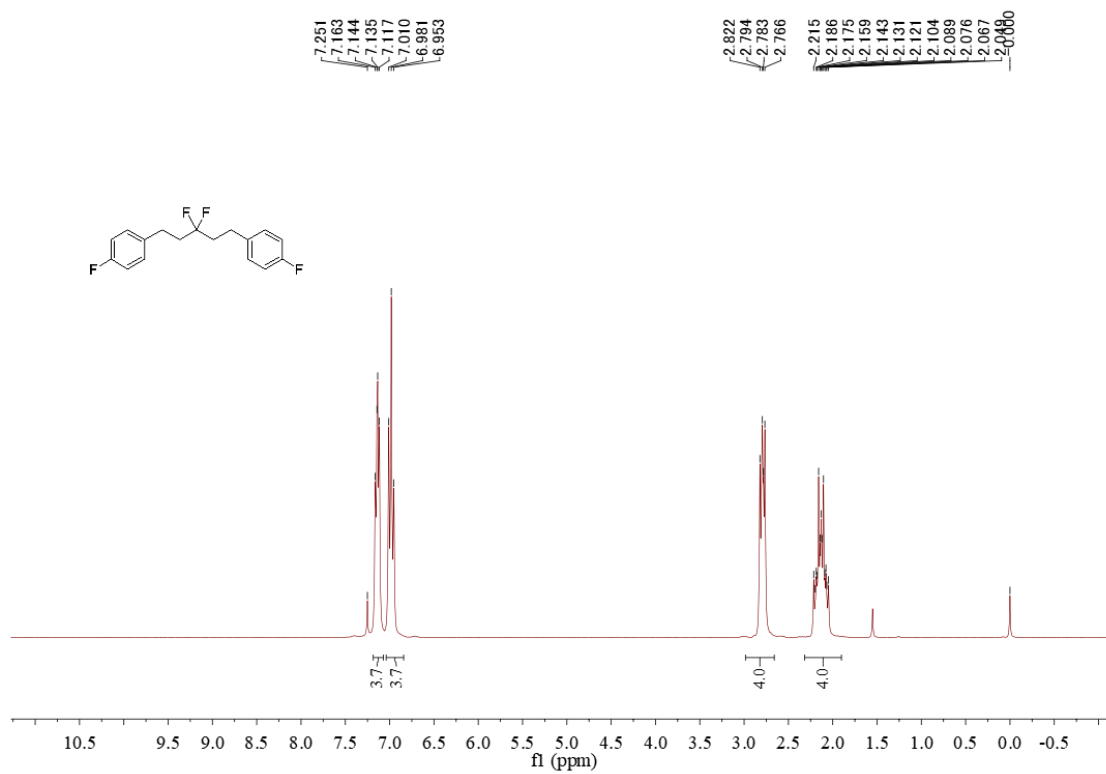

Figure S181.  $^{13}\text{C}$  NMR spectrum of unknown *gem*-difluoride **1u**, related to **Figure 2**

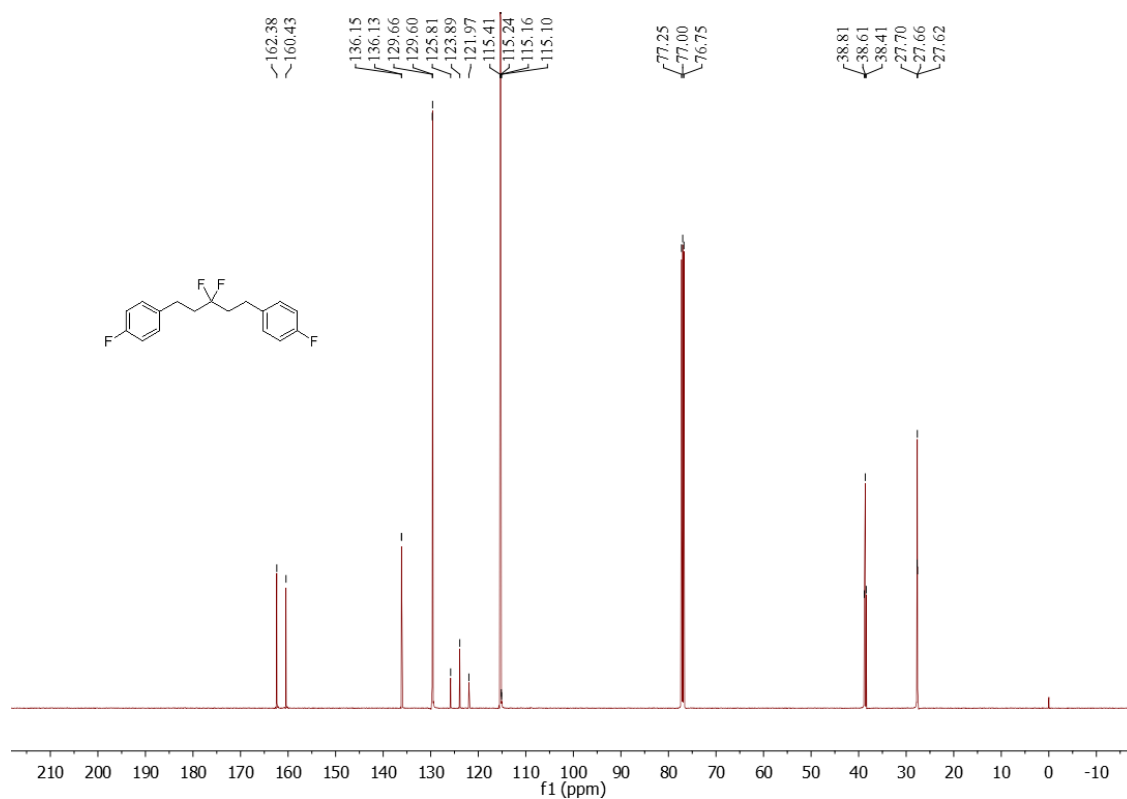

Figure S182.  $^{19}\text{F}$  NMR spectrum of unknown *gem*-difluoride **1u**, related to **Figure 2**

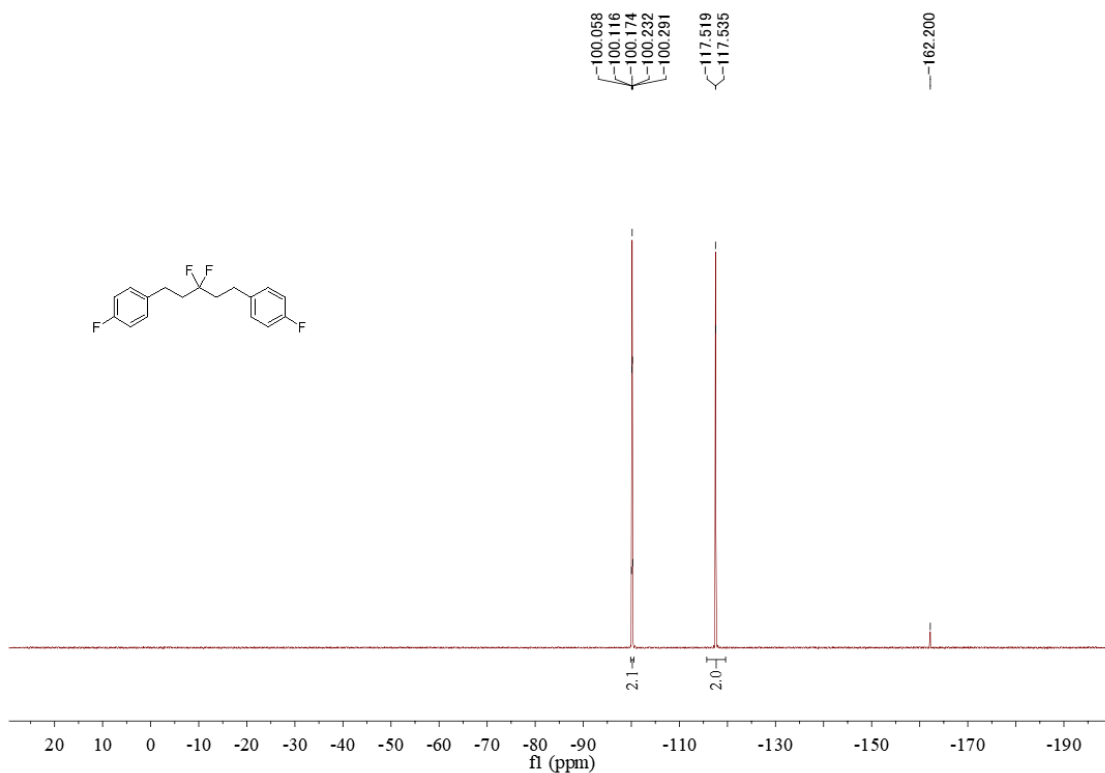

Figure S183. <sup>1</sup>H NMR spectrum of unknown *gem*-difluoride **1cc**, related to **Figure 2**

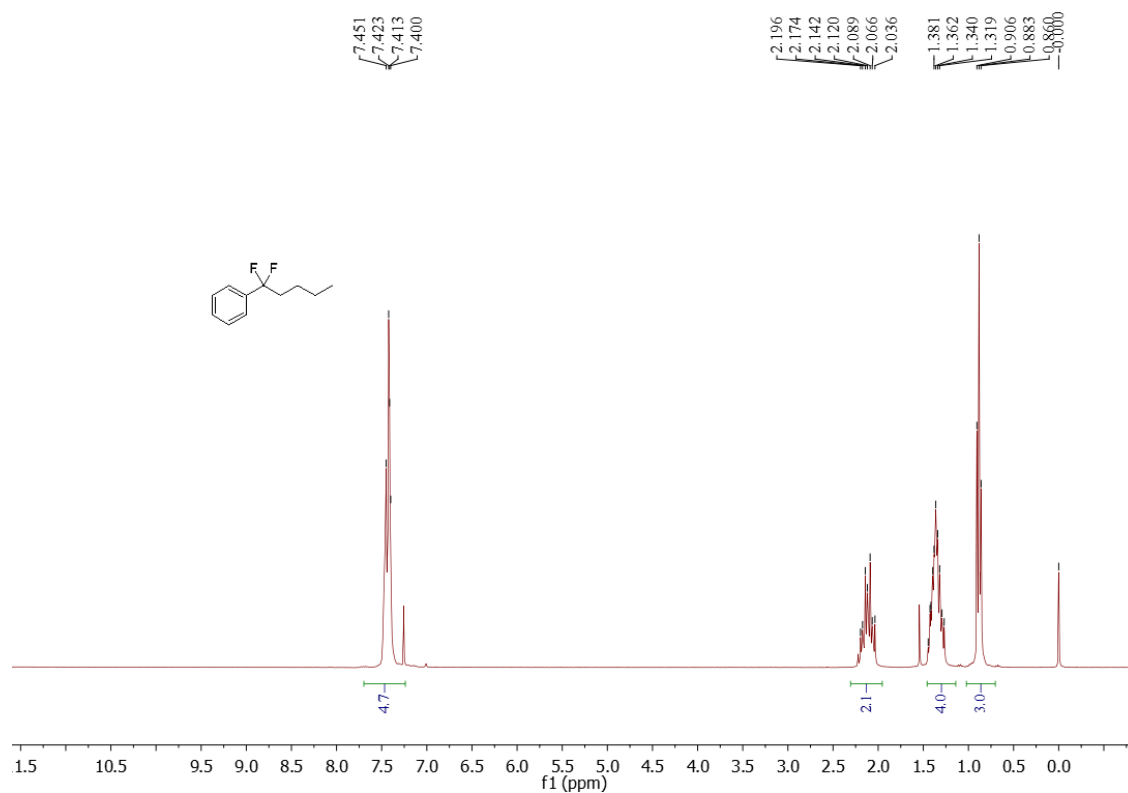

Figure S184. <sup>13</sup>C NMR spectrum of unknown *gem*-difluoride **1cc**, related to **Figure 2**

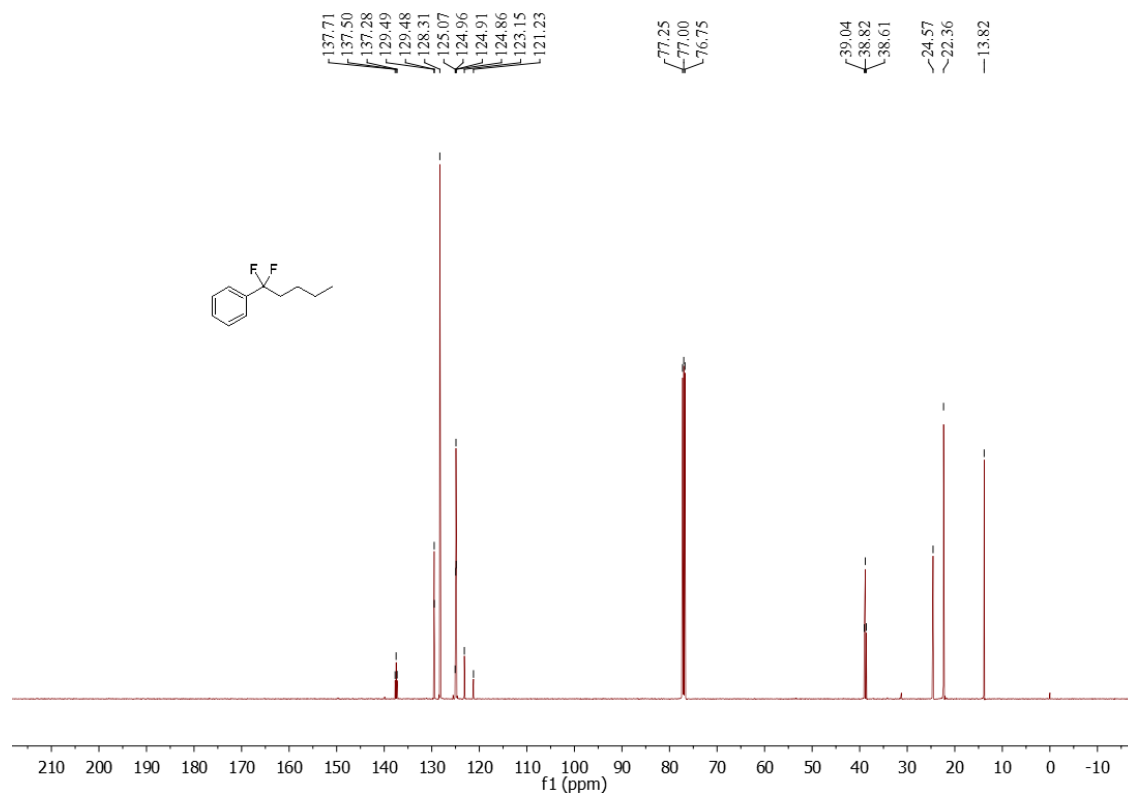

Figure S185.  $^{19}\text{F}$  NMR spectrum of unknown *gem*-difluoride **1cc**, related to Figure 2

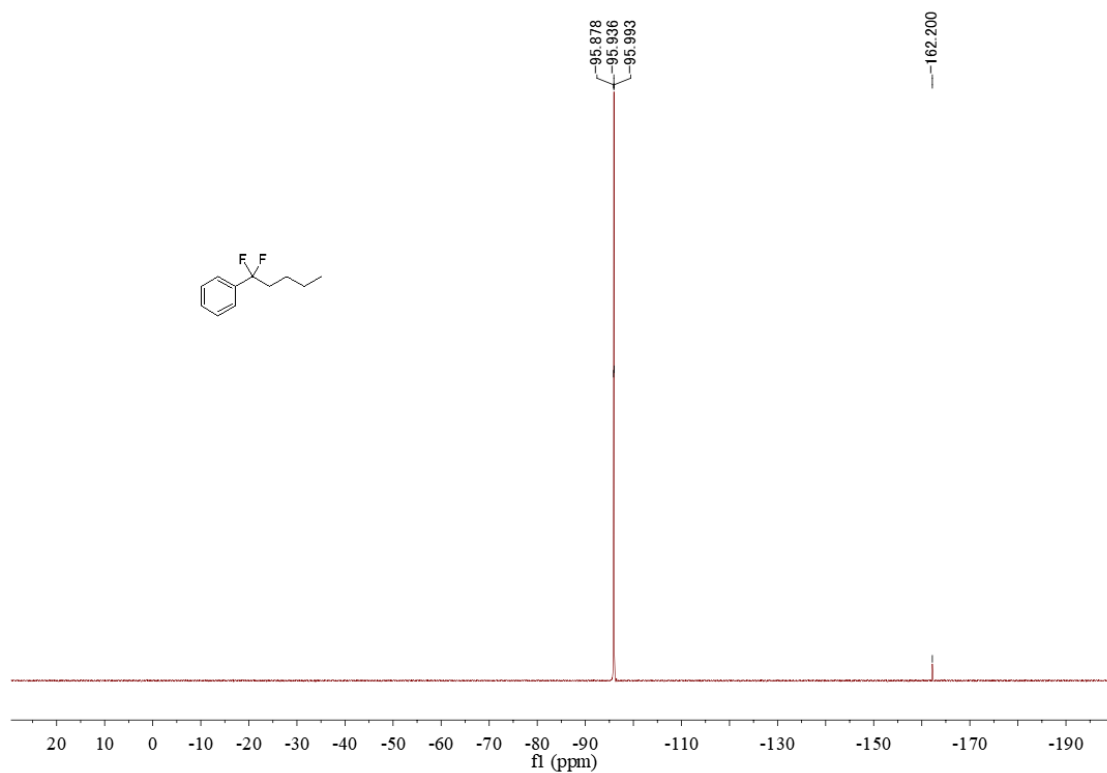

Figure S186.  $^1\text{H}$  NMR spectrum of unknown *gem*-difluoride **1ee**, related to Figure 2

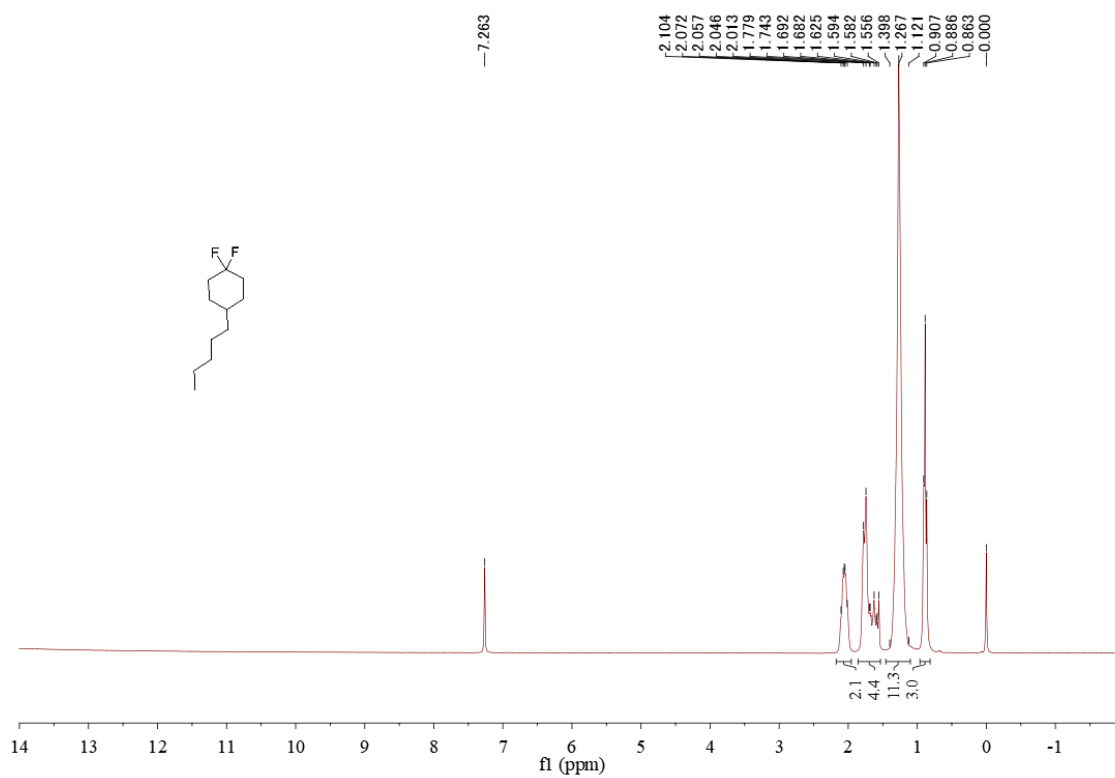

Figure S187.  $^{13}\text{C}$  NMR spectrum of unknown *gem*-difluoride **1ee**, related to Figure 2

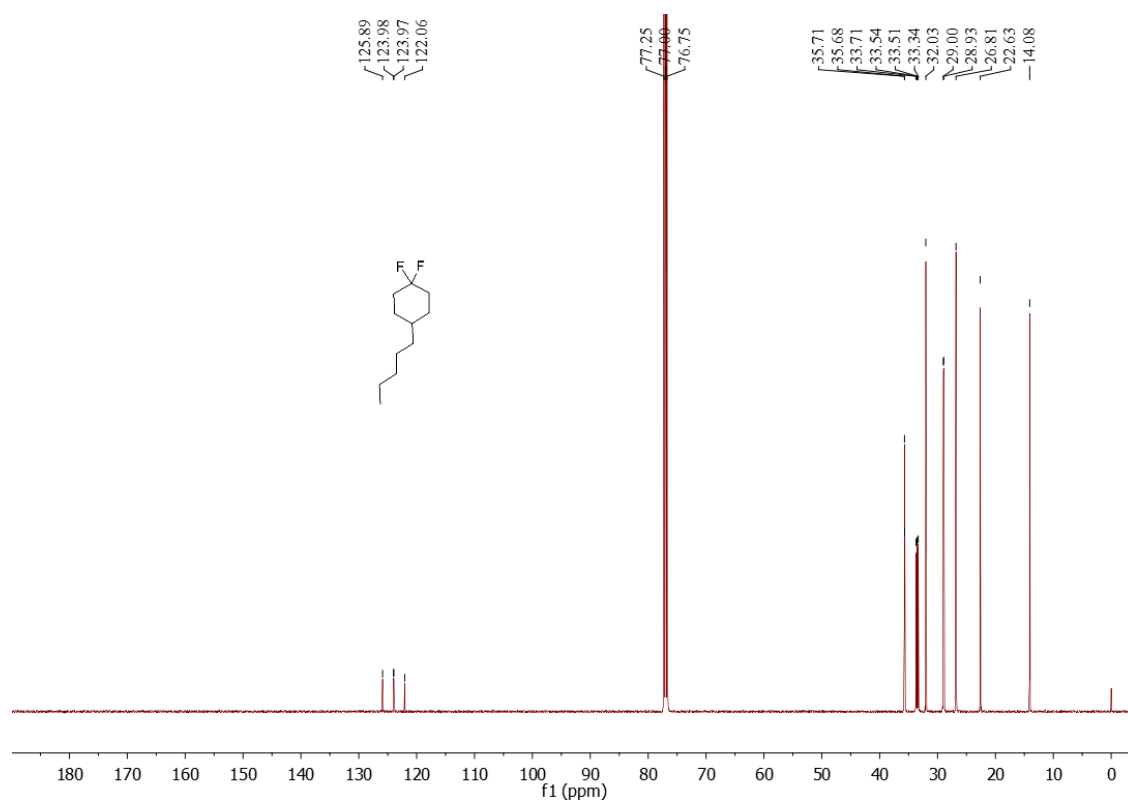

Figure S188.  $^{19}\text{F}$  NMR spectrum of unknown *gem*-difluoride **1ee**, related to Figure 2

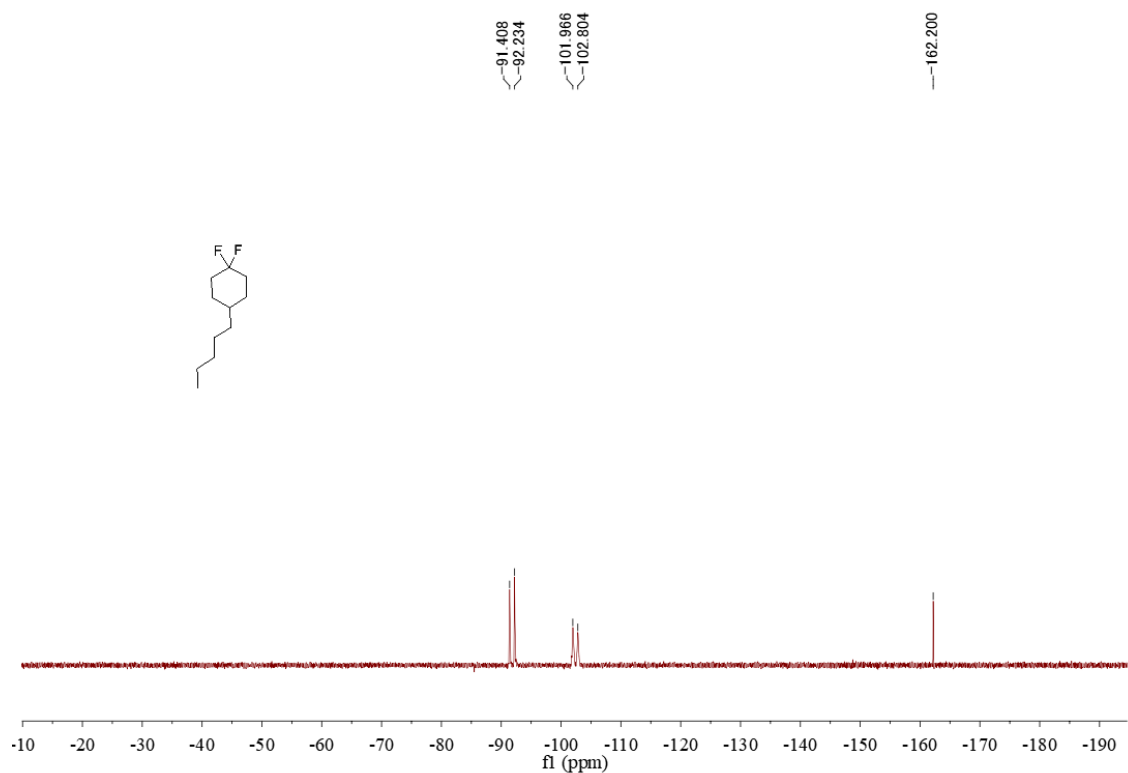



Figure S189.  $^1\text{H}$  NMR spectrum of unknown *gem*-difluoride **1hh**, related to **Figure 2**

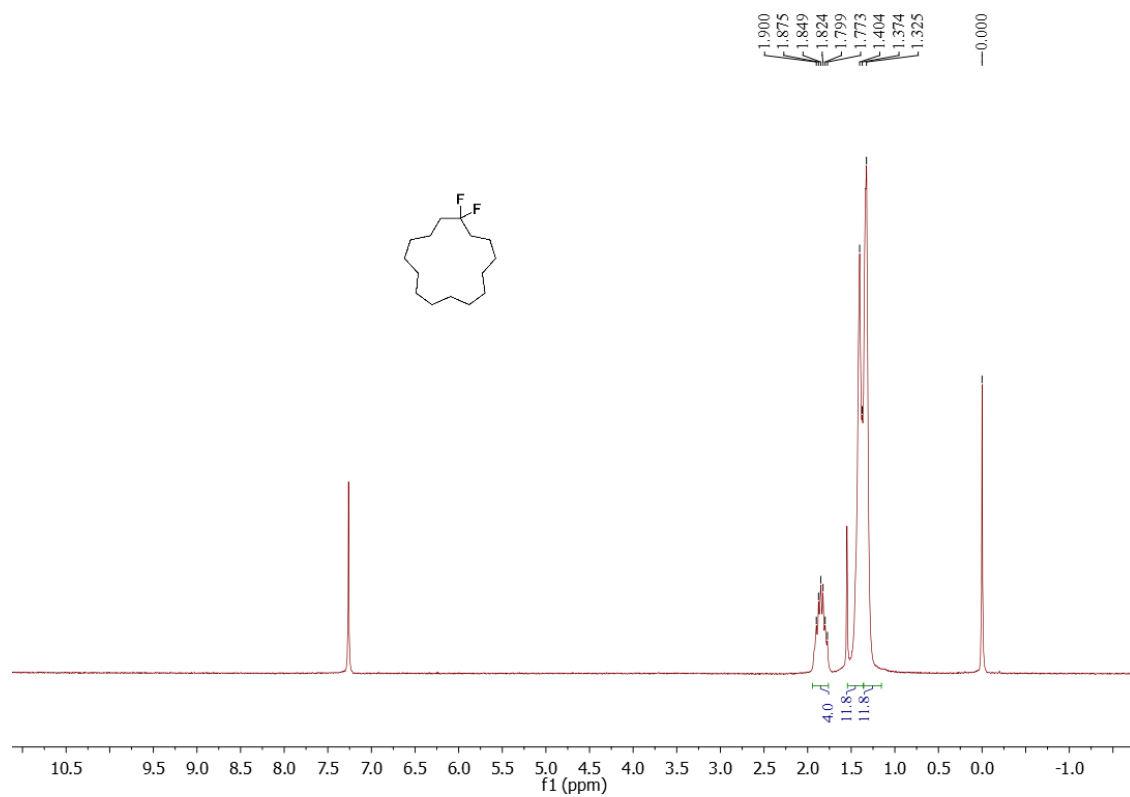

Figure S190.  $^{13}\text{C}$  NMR spectrum of unknown *gem*-difluoride **1hh**, related to **Figure 2**

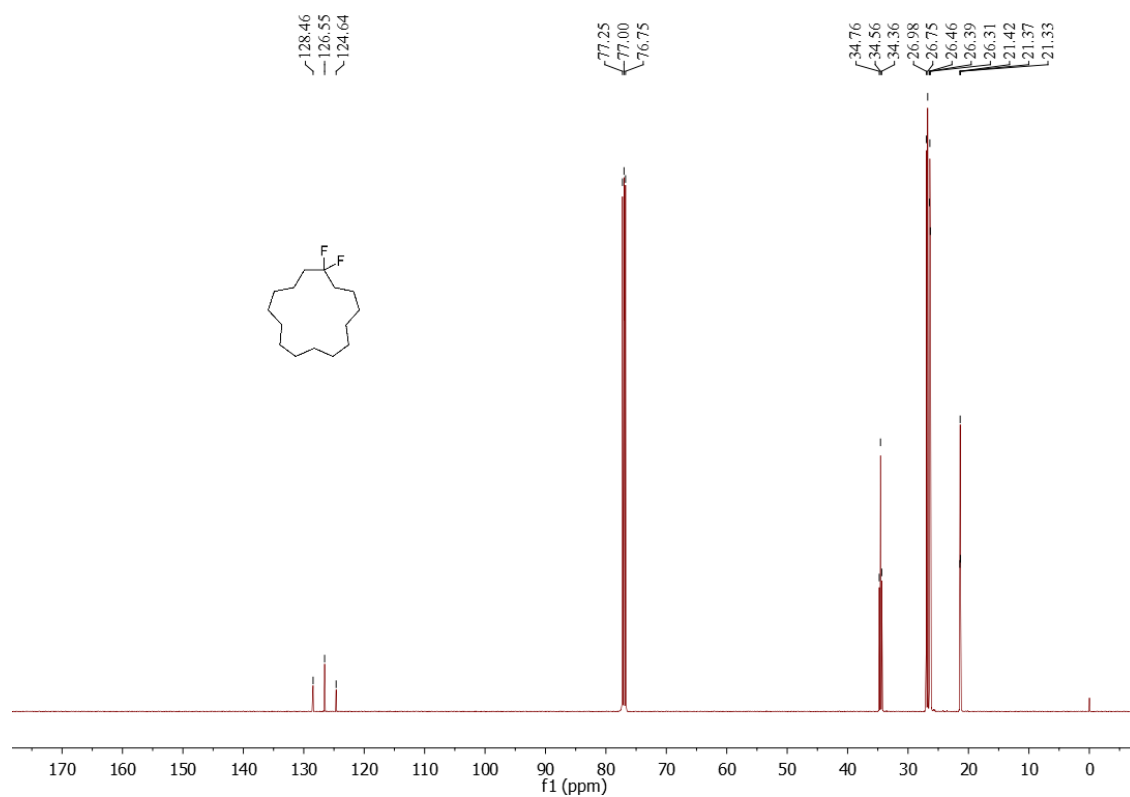

Figure S191.  $^{19}\text{F}$  NMR spectrum of unknown *gem*-difluoride **1hh**, related to Figure 2

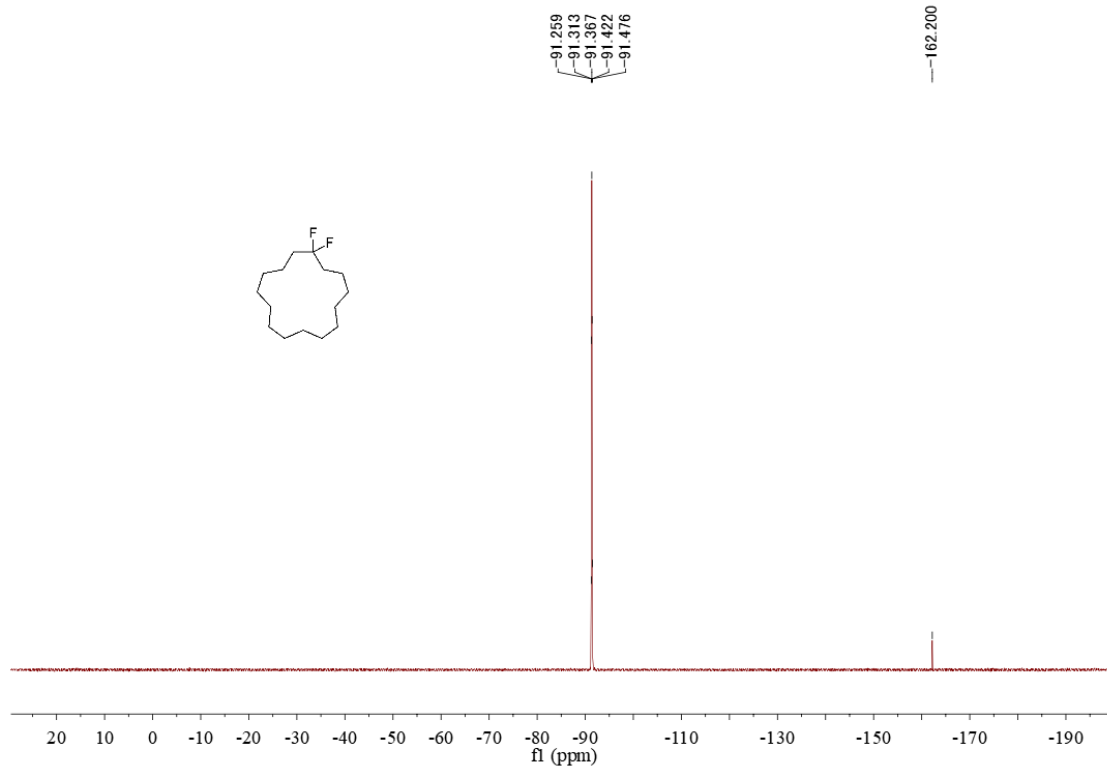

Figure S192. <sup>1</sup>H NMR spectrum of unknown secondary monofluoride **4a**, related to Figure 3

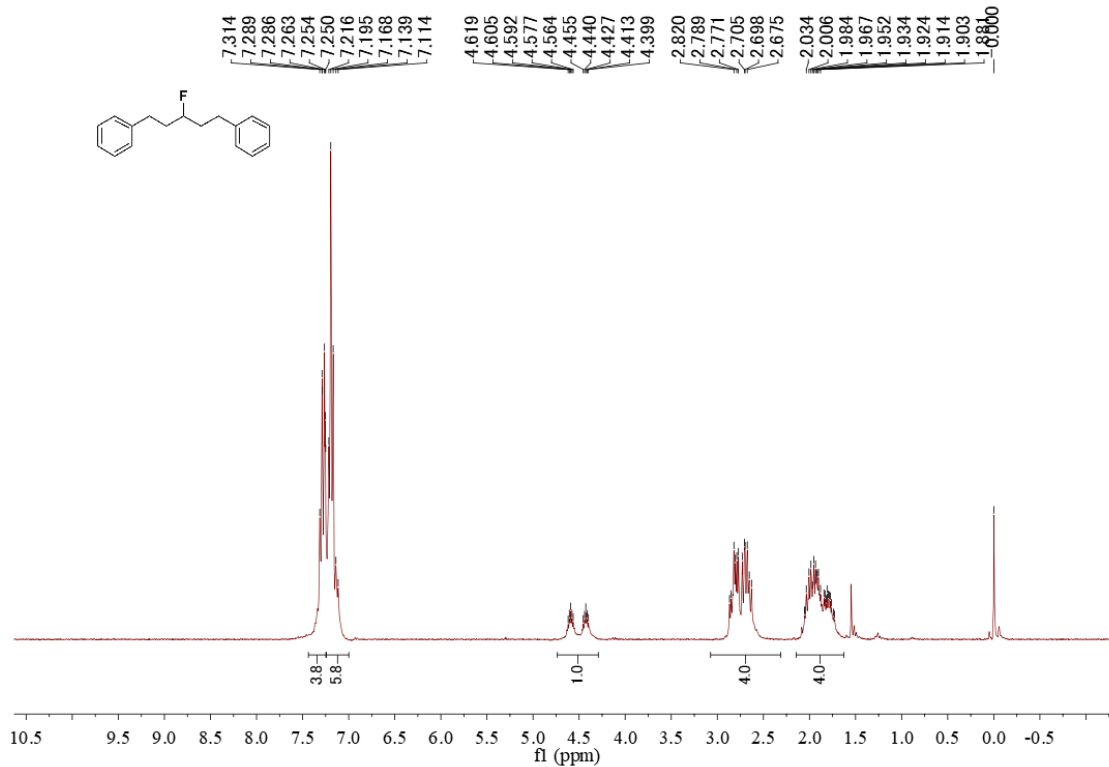

Figure S193. <sup>13</sup>C NMR spectrum of unknown secondary monofluoride **4a**, related to Figure 3

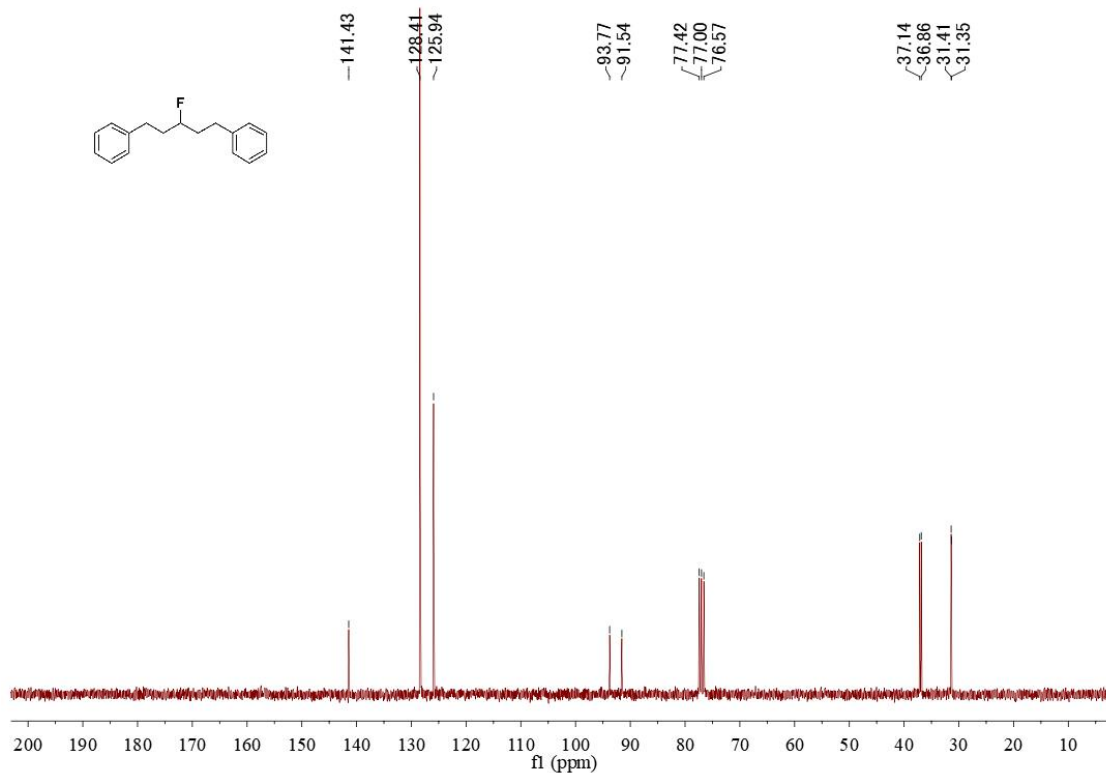

Figure S194.  $^{19}\text{F}$  NMR spectrum of unknown secondary monofluoride **4a**, related to Figure 3

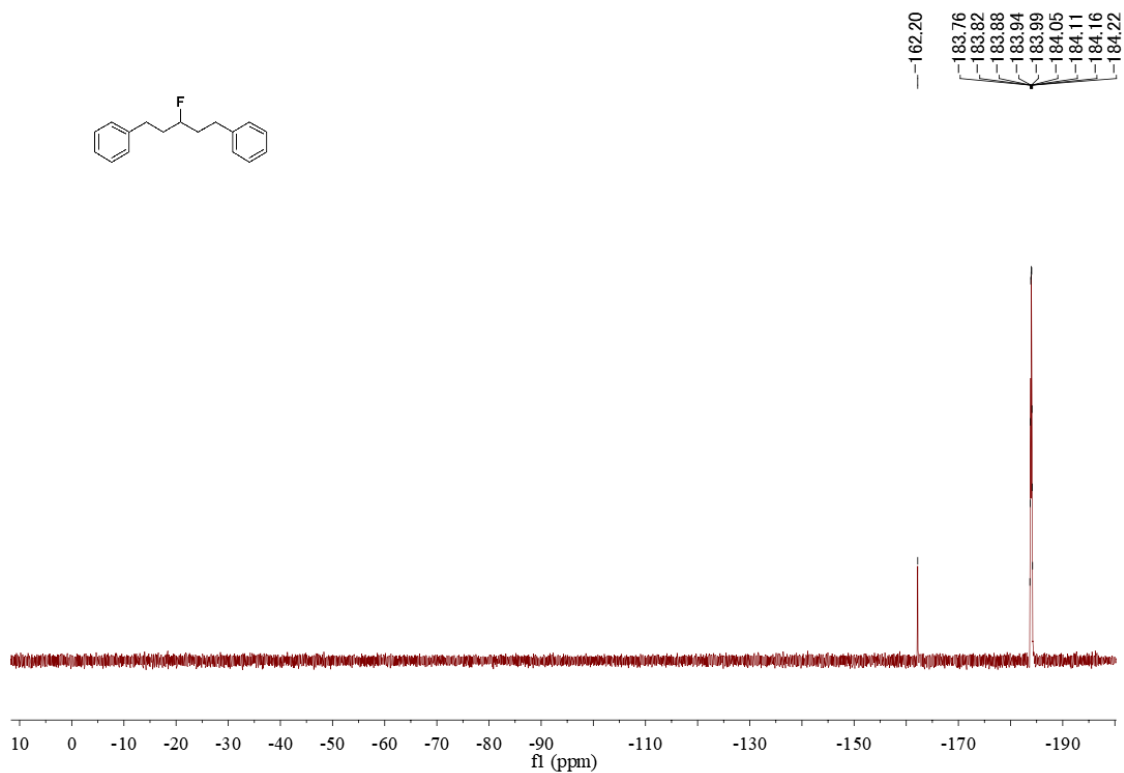

Figure S195.  $^1\text{H}$  NMR spectrum of unknown secondary monofluoride **4b**, related to Figure 3

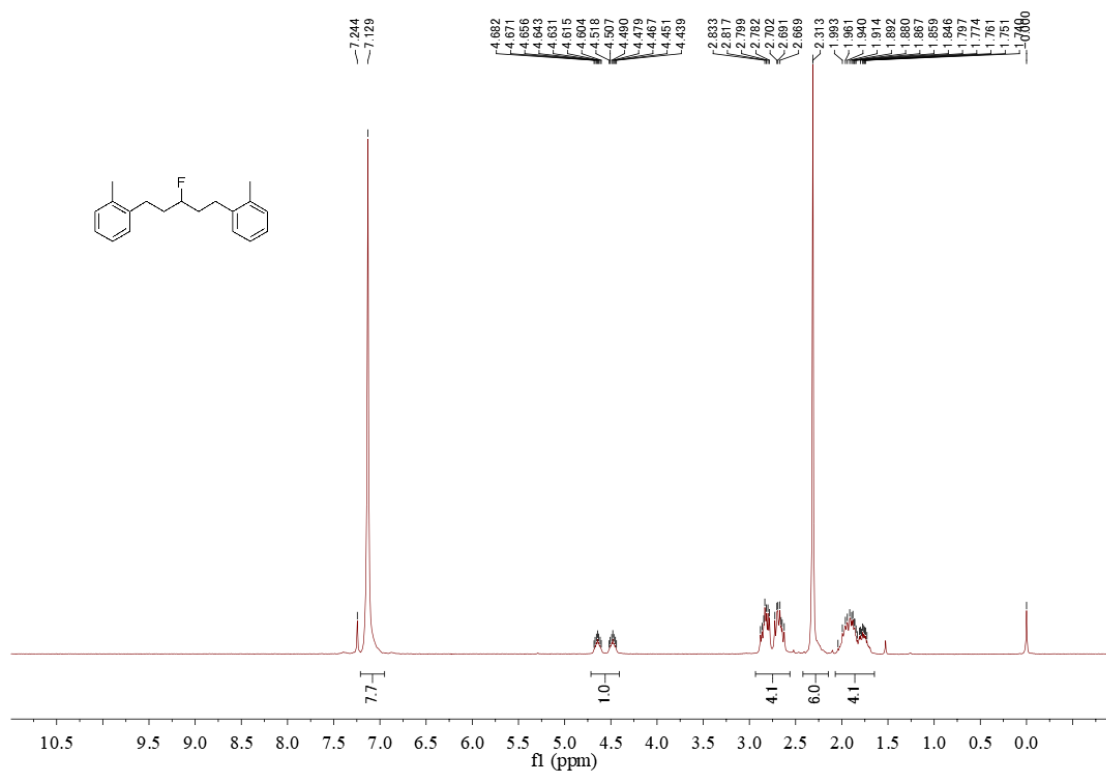

Figure S196.  $^{13}\text{C}$  NMR spectrum of unknown secondary monofluoride **4b**, related to Figure 3

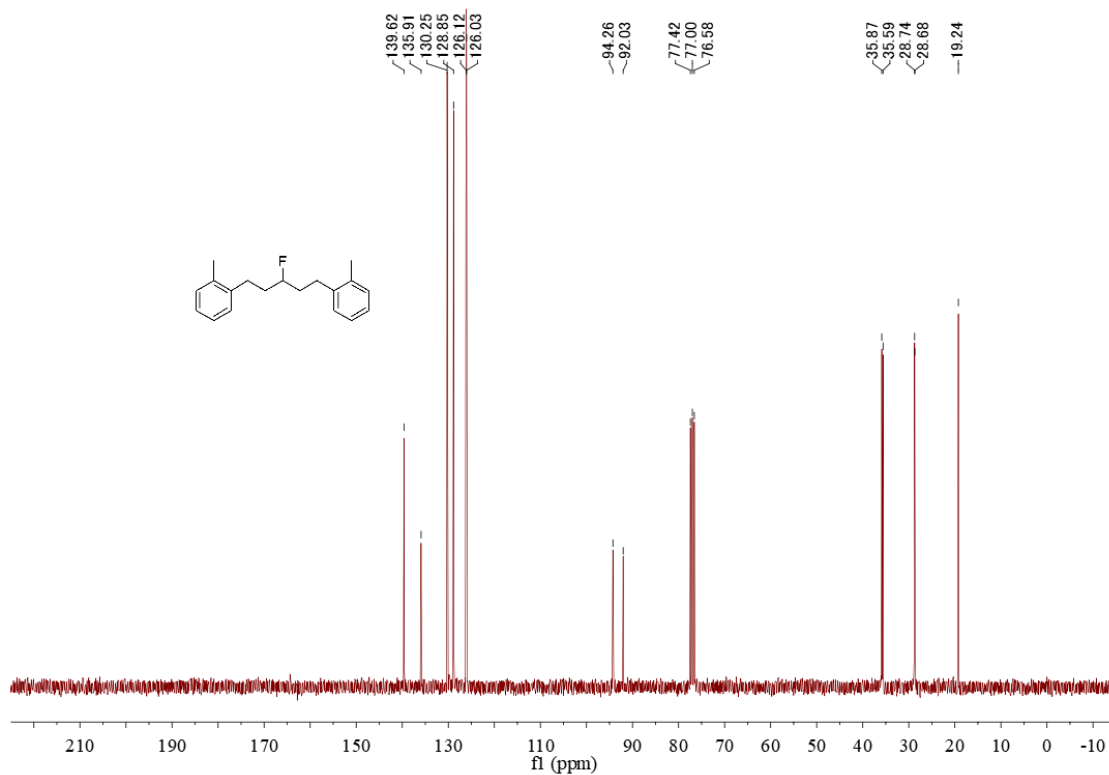

Figure S197.  $^{19}\text{F}$  NMR spectrum of unknown secondary monofluoride **4b**, related to Figure 3

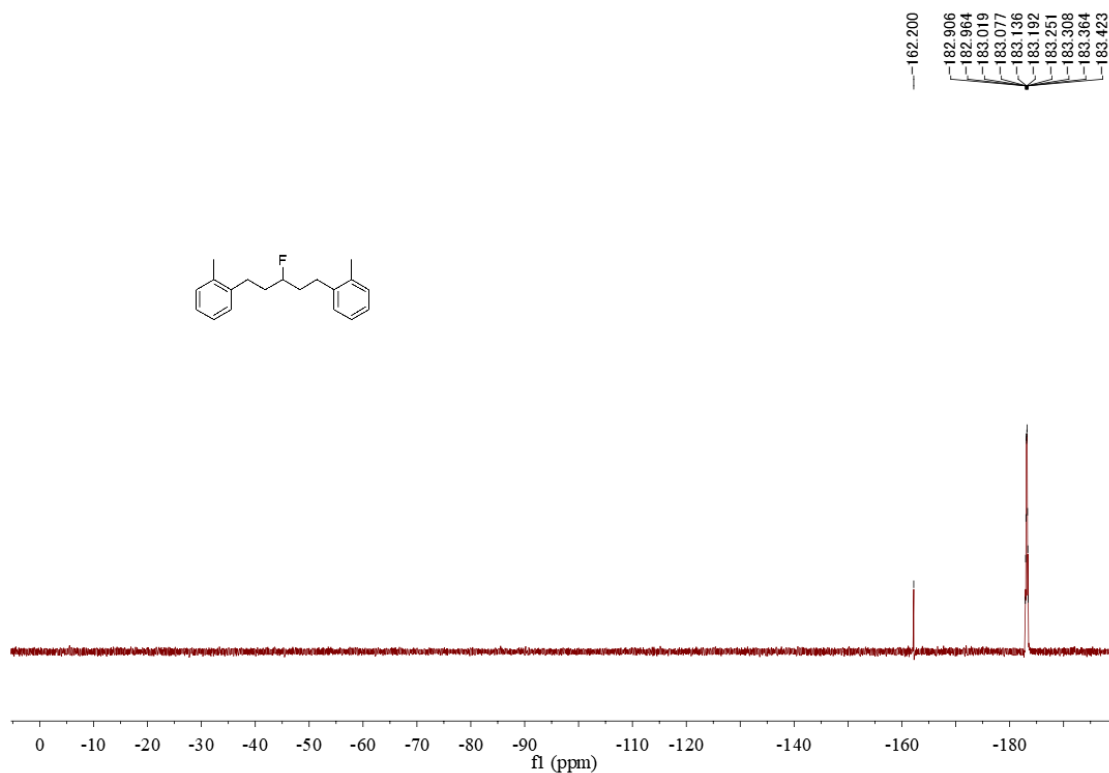

Figure S198. <sup>1</sup>H NMR spectrum of unknown secondary monofluoride **4c**, related to Figure 3

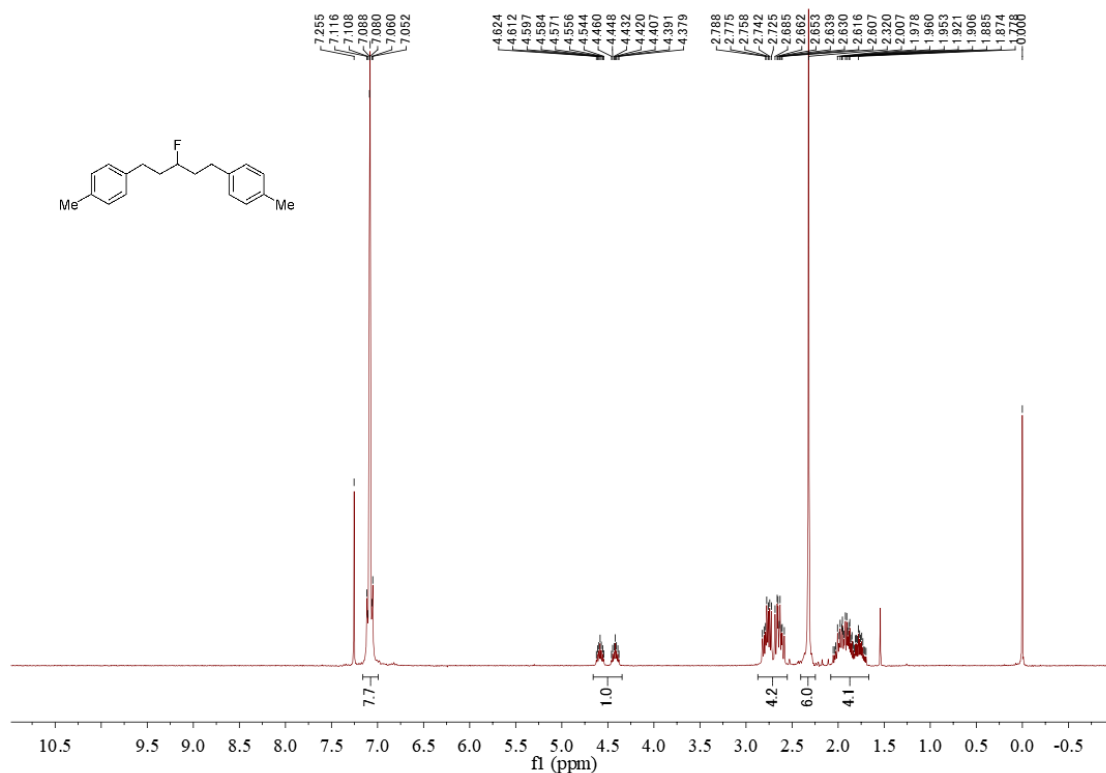

Figure S199. <sup>13</sup>C NMR spectrum of unknown secondary monofluoride **4c**, related to Figure 3

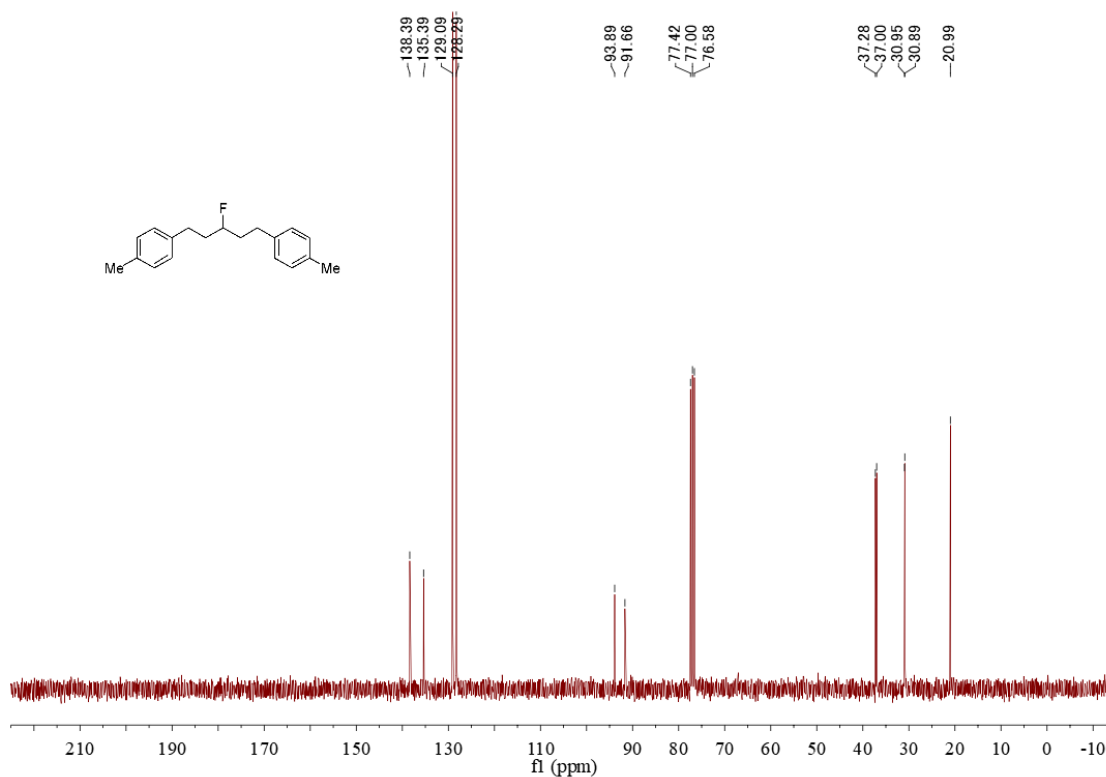

Figure S200.  $^{19}\text{F}$  NMR spectrum of unknown secondary monofluoride **4c**, related to Figure 3

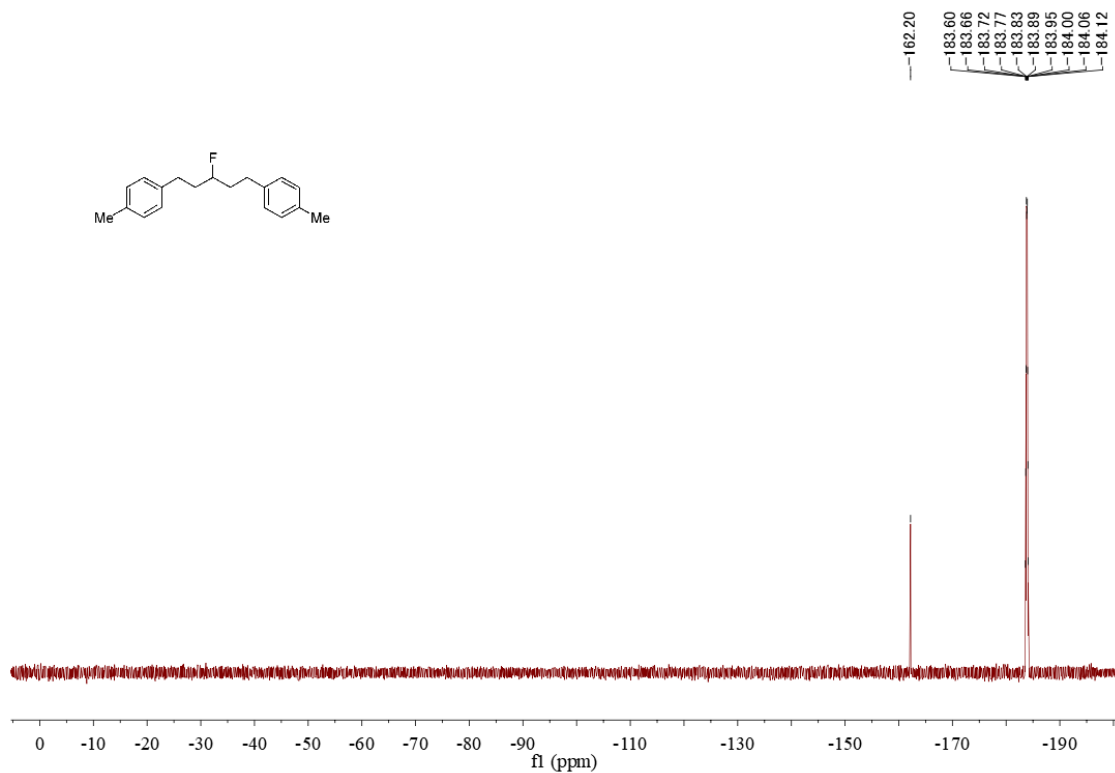

Figure S201.  $^1\text{H}$  NMR spectrum of unknown secondary monofluoride **4d**, related to Figure 3

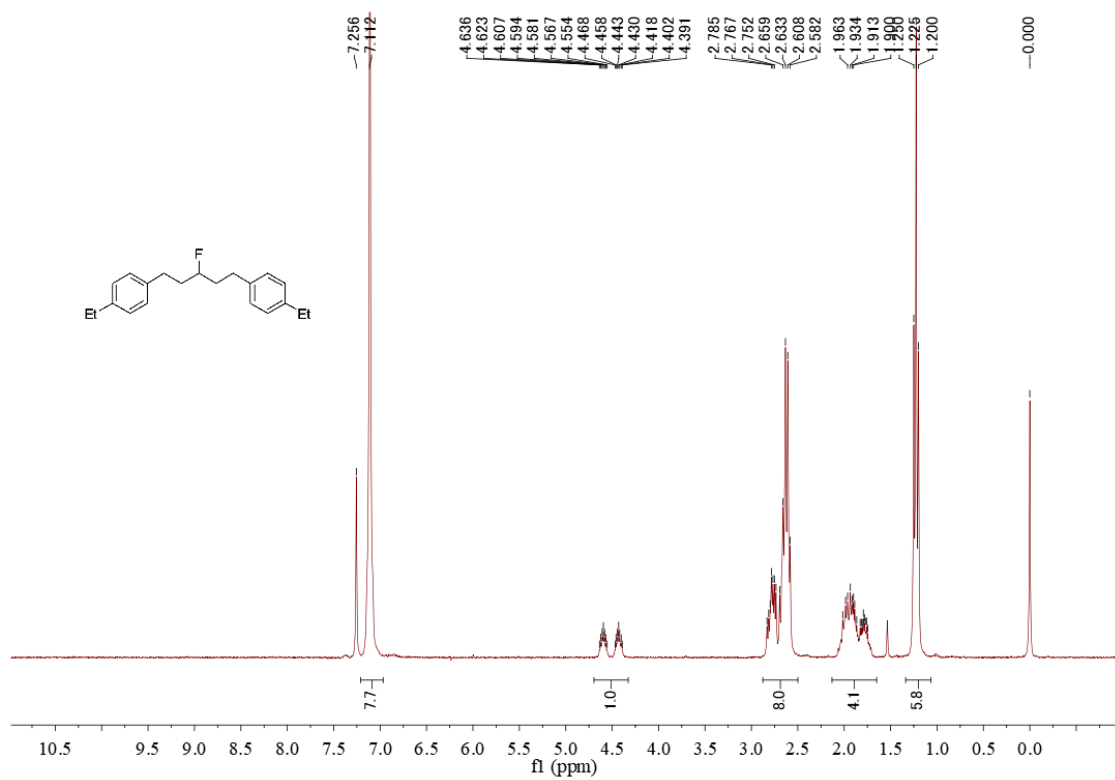

Figure S202.  $^{13}\text{C}$  NMR spectrum of unknown secondary monofluoride **4d**, related to Figure 3

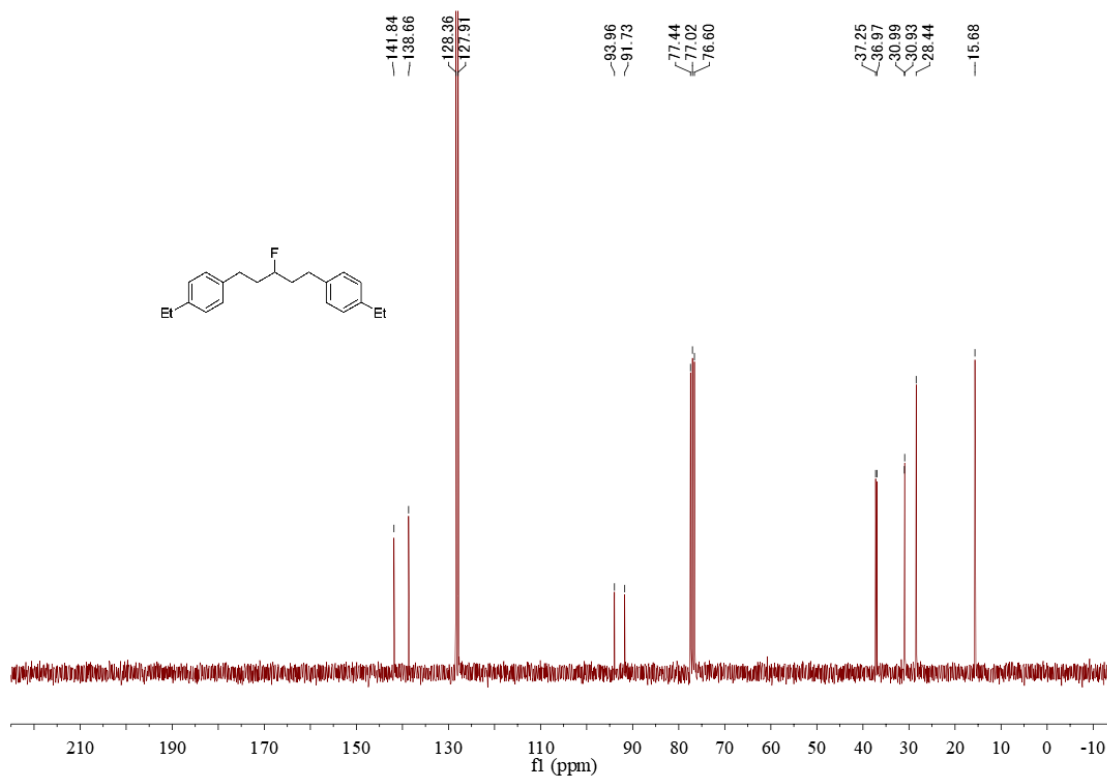

Figure S203.  $^{19}\text{F}$  NMR spectrum of unknown secondary monofluoride **4d**, related to Figure 3

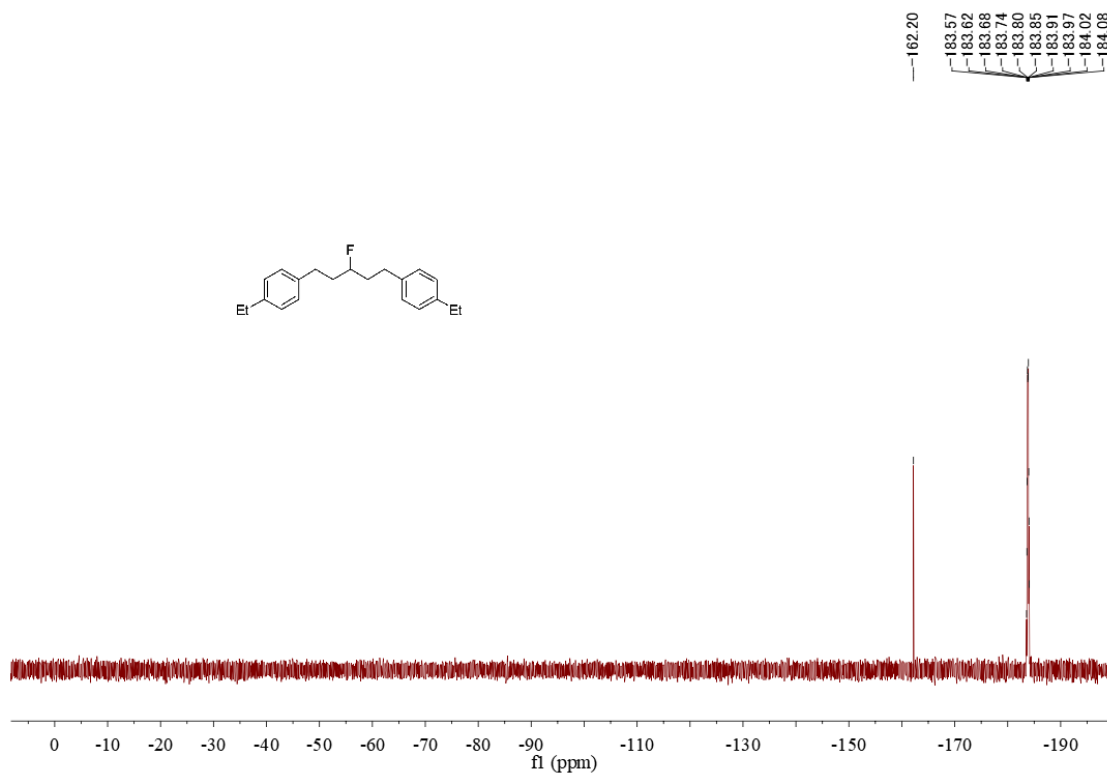



Figure S204. <sup>1</sup>H NMR spectrum of unknown secondary monofluoride **4e**, related to Figure 3

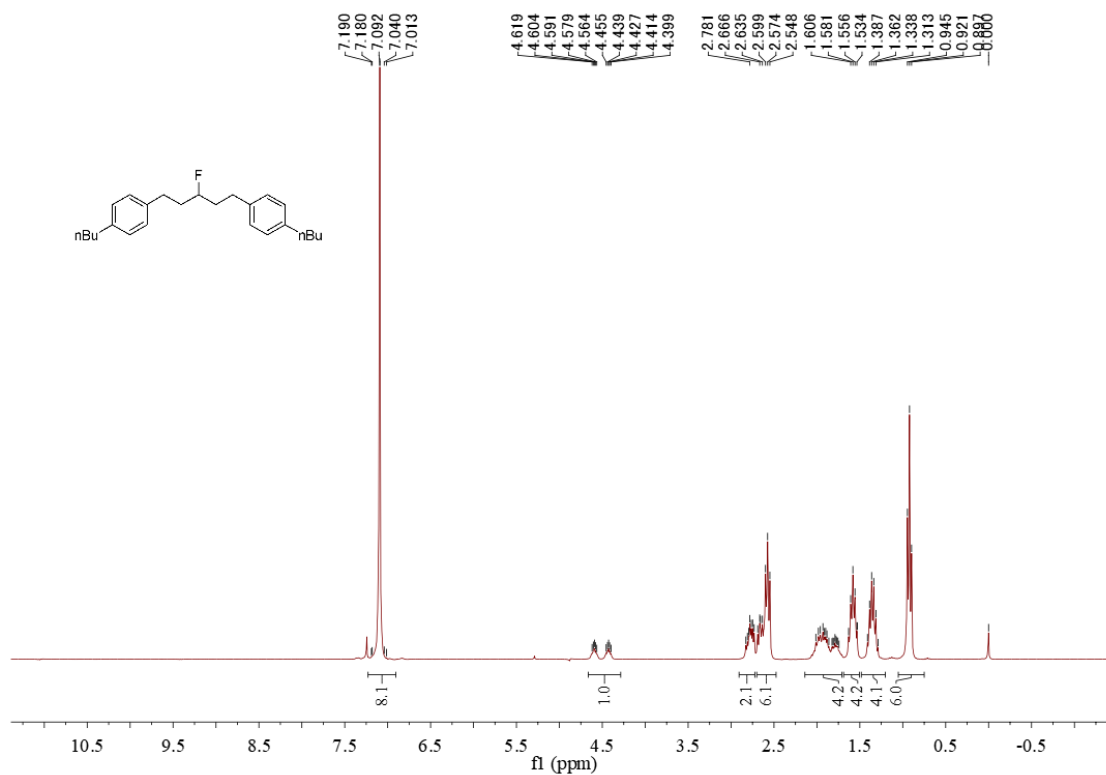

Figure S205. <sup>13</sup>C NMR spectrum of unknown secondary monofluoride **4e**, related to Figure 3

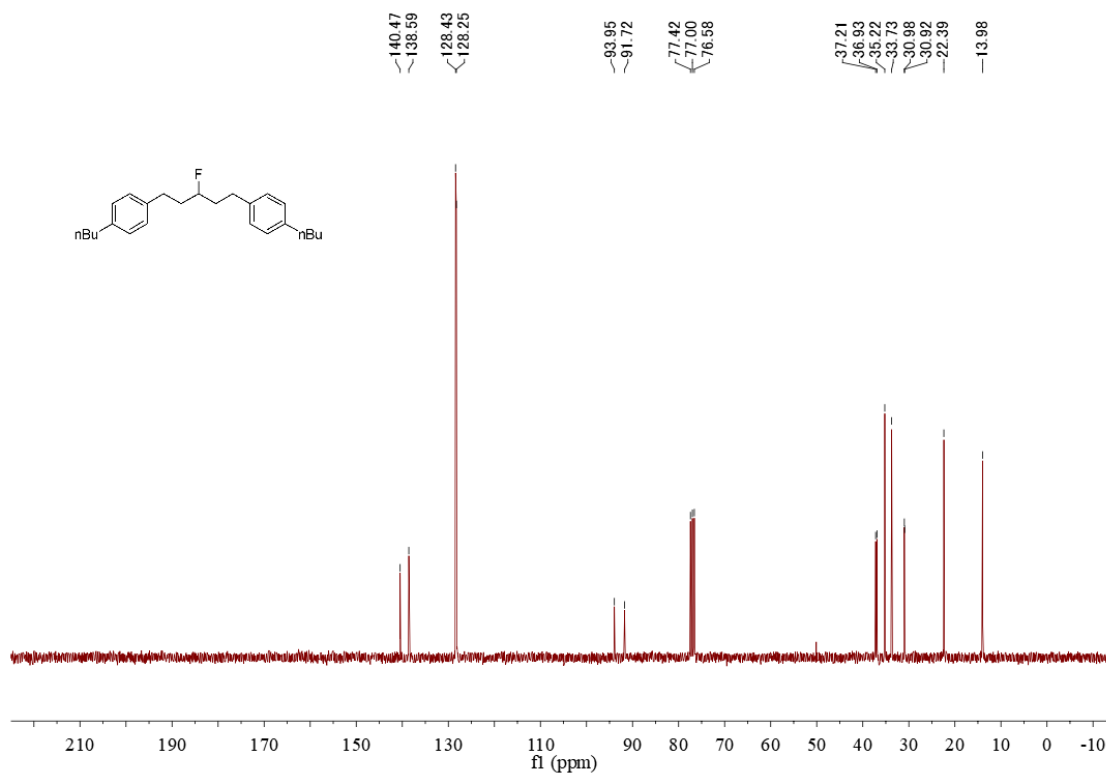

Figure S206  $^{19}\text{F}$  NMR spectrum of unknown secondary monofluoride **4e**, related to Figure 3

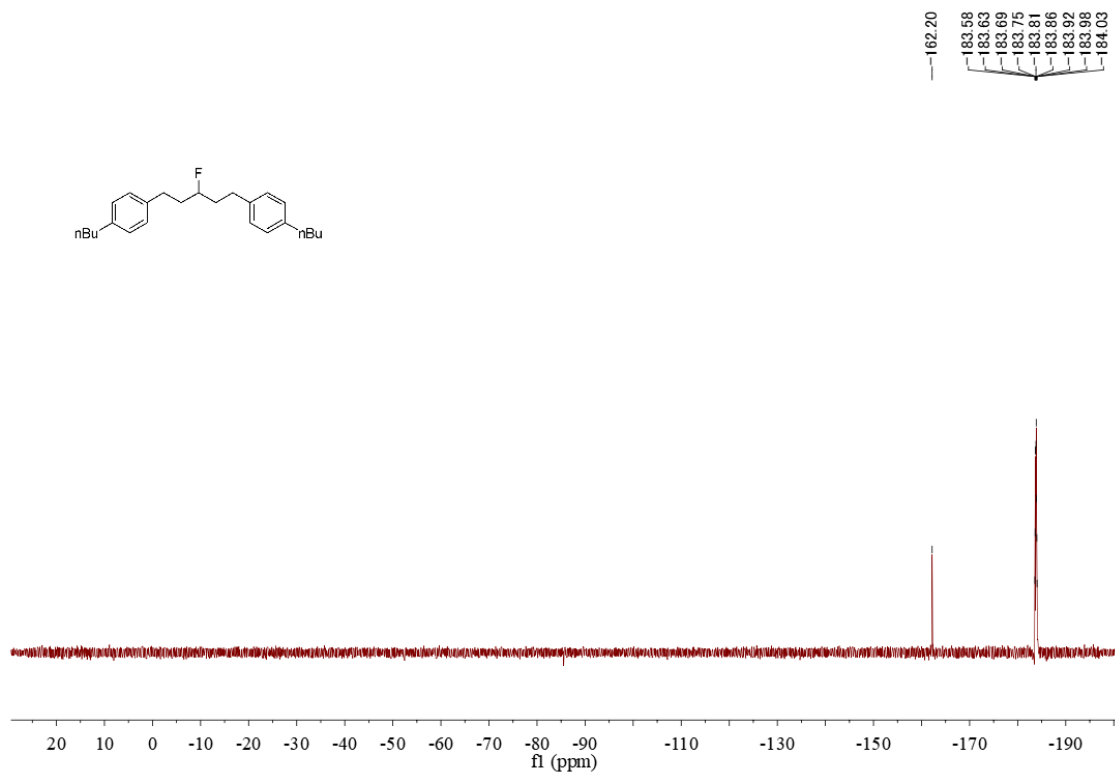

Figure S207.  $^1\text{H}$  NMR spectrum of unknown secondary monofluoride **4f**, related to Figure 3

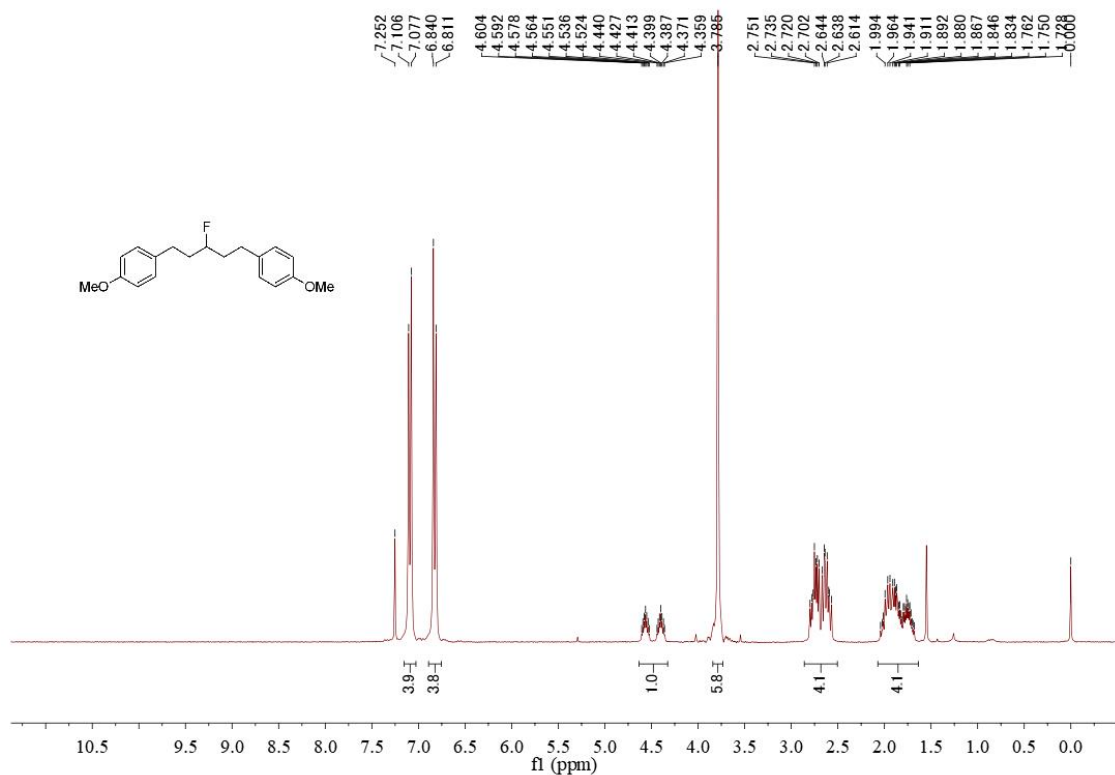

Figure S208.  $^{13}\text{C}$  NMR spectrum of unknown secondary monofluoride **4f**, related to Figure 3

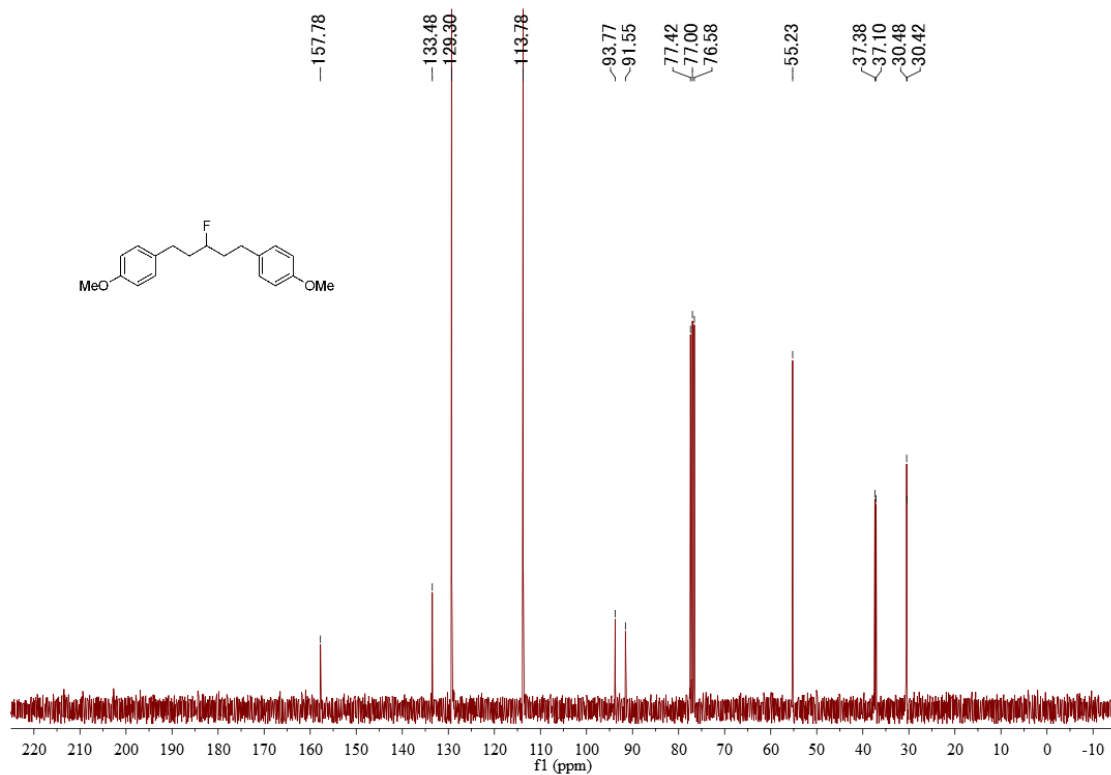

Figure S209.  $^{19}\text{F}$  NMR spectrum of unknown secondary monofluoride **4f**, related to Figure 3

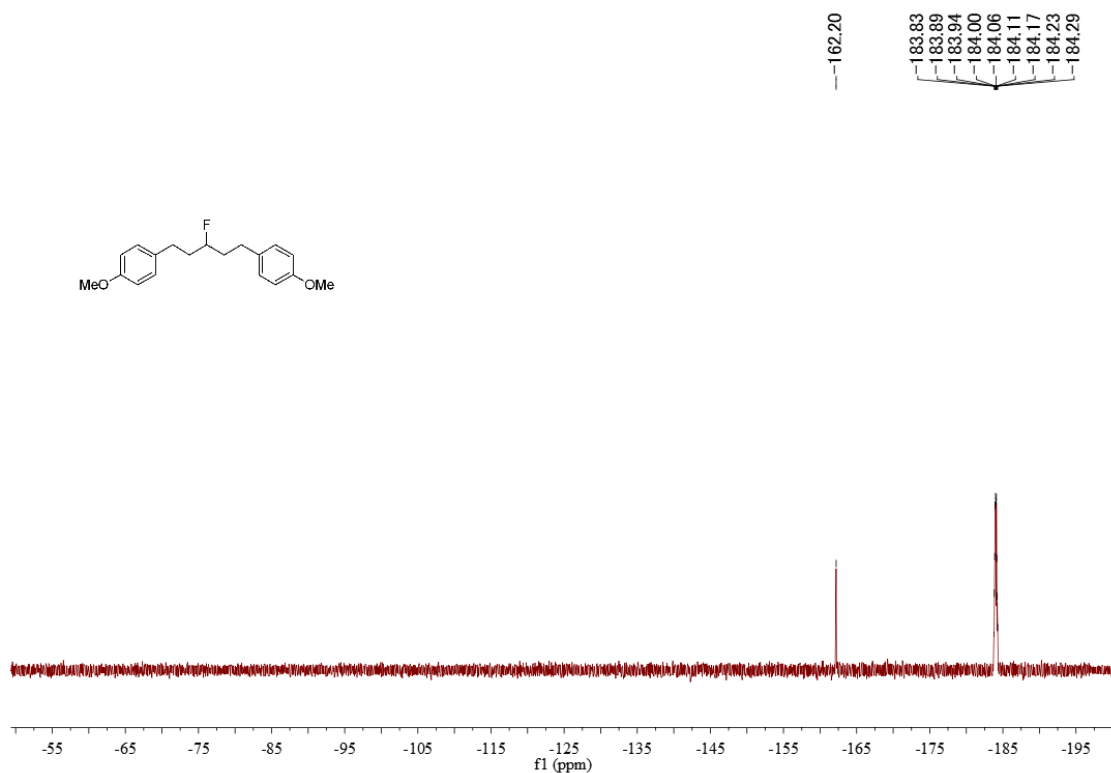

Figure S210. <sup>1</sup>H NMR spectrum of unknown secondary monofluoride **4g**, related to Figure 3

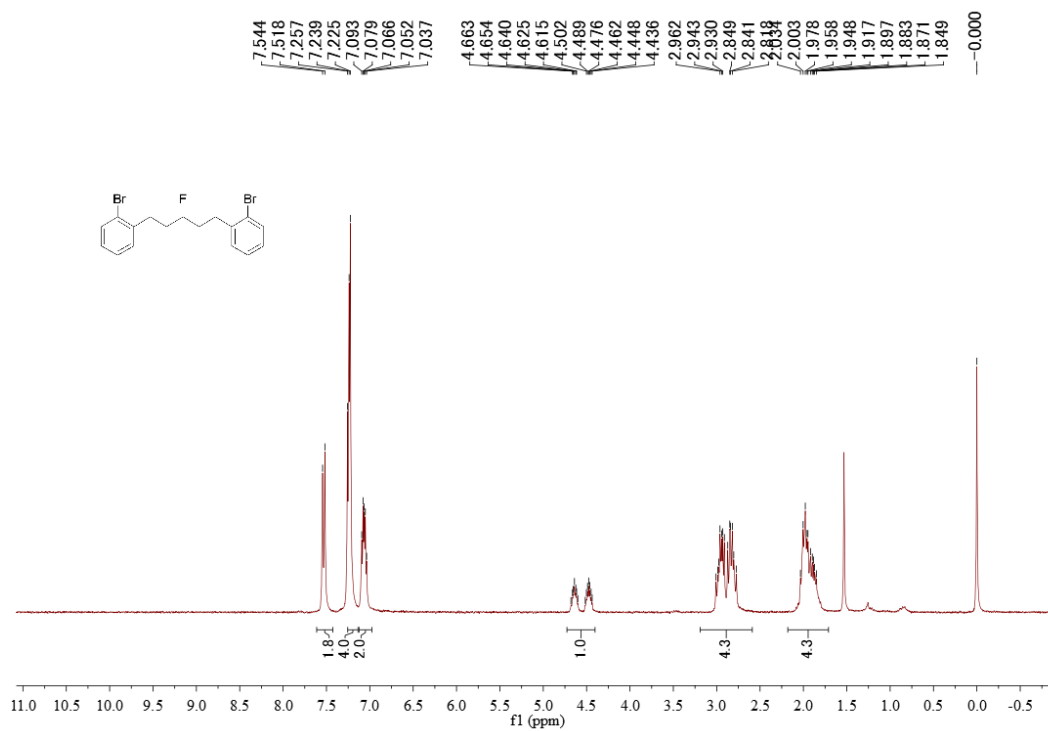

Figure S211. <sup>13</sup>C NMR spectrum of unknown secondary monofluoride **4g**, related to Figure 3

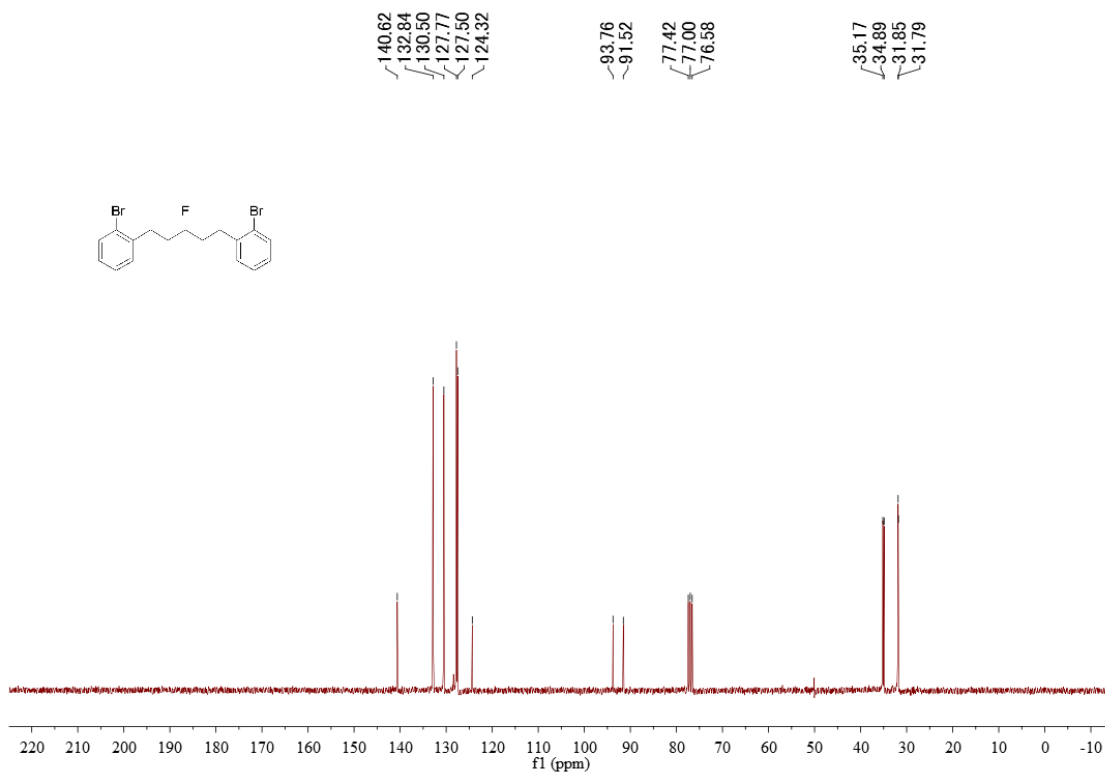

Figure S212.  $^{19}\text{F}$  NMR spectrum of unknown secondary monofluoride **4g**, related to Figure 3

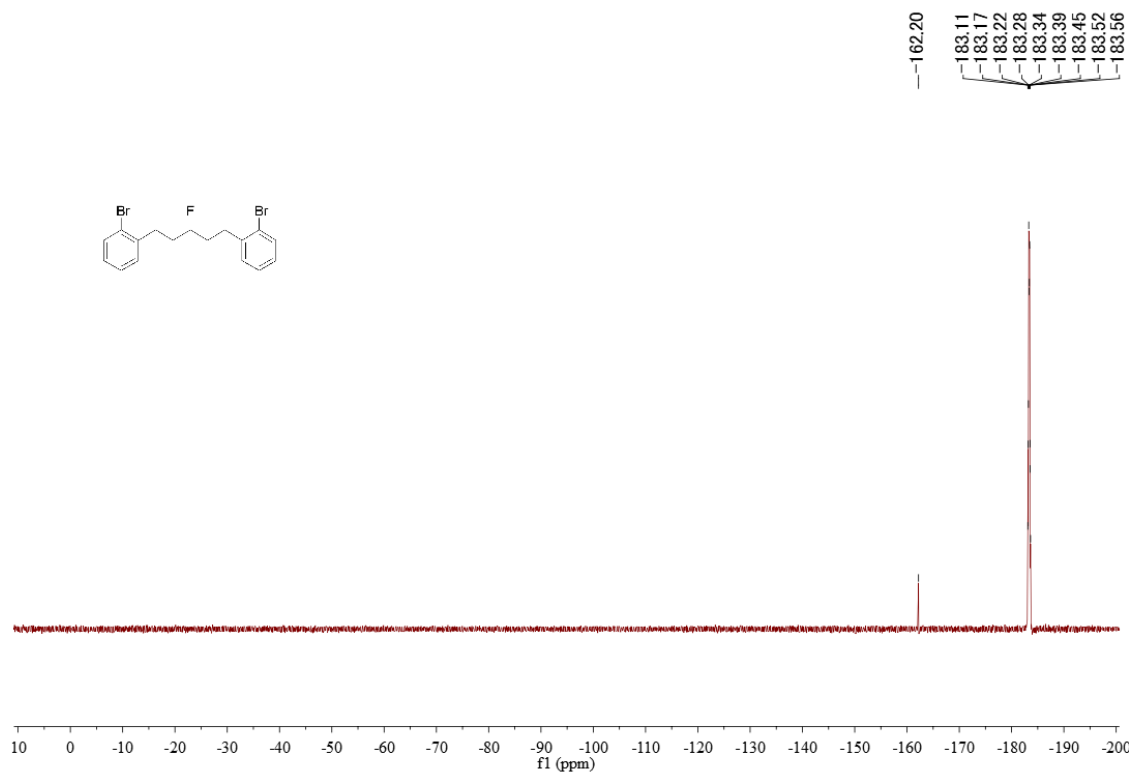

Figure S213.  $^1\text{H}$  NMR spectrum of unknown secondary monofluoride **4h**, related to Figure 3

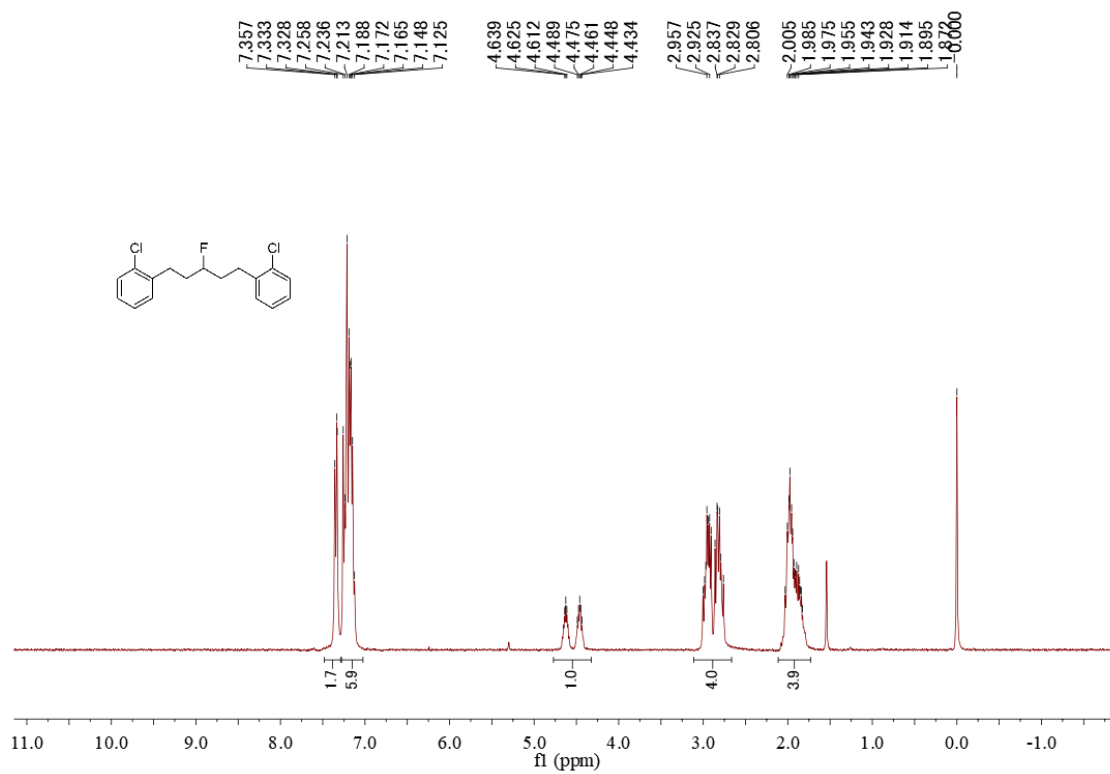

Figure S214.  $^{13}\text{C}$  NMR spectrum of unknown secondary monofluoride **4h**, related to Figure 3

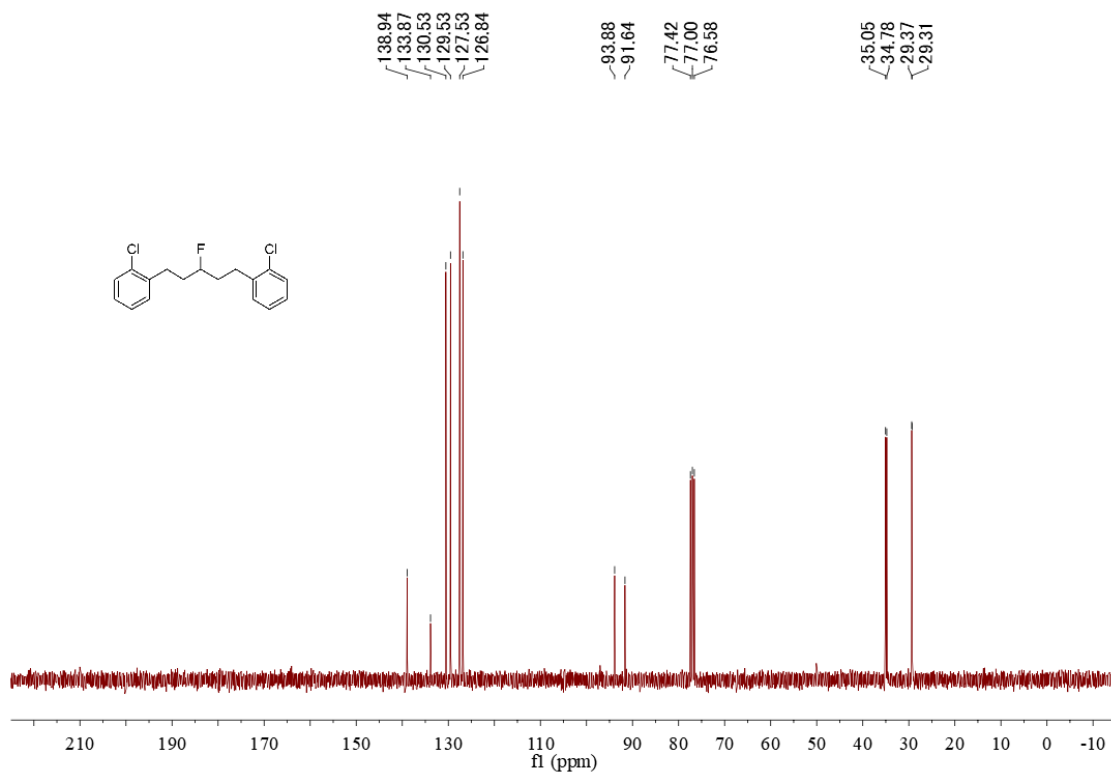

Figure S215.  $^{19}\text{F}$  NMR spectrum of unknown secondary monofluoride **4h**, related to Figure 3

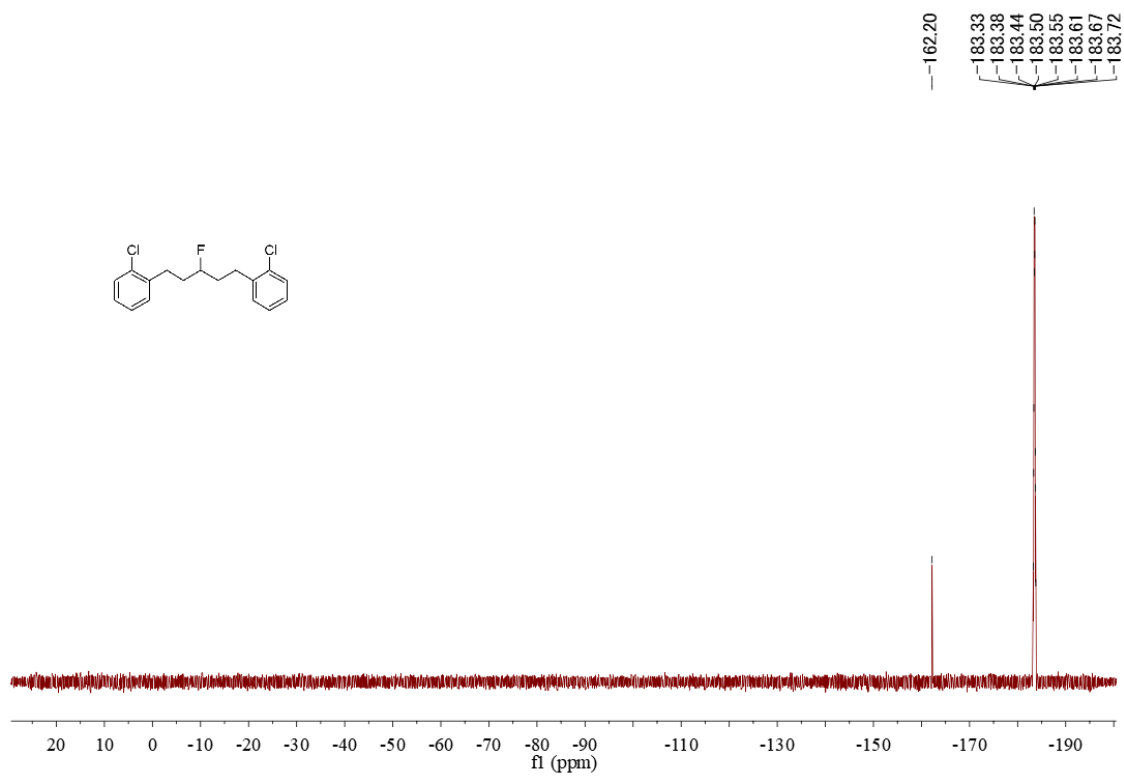

Figure S216. <sup>1</sup>H NMR spectrum of unknown secondary monofluoride **4i**, related to **Figure 3**

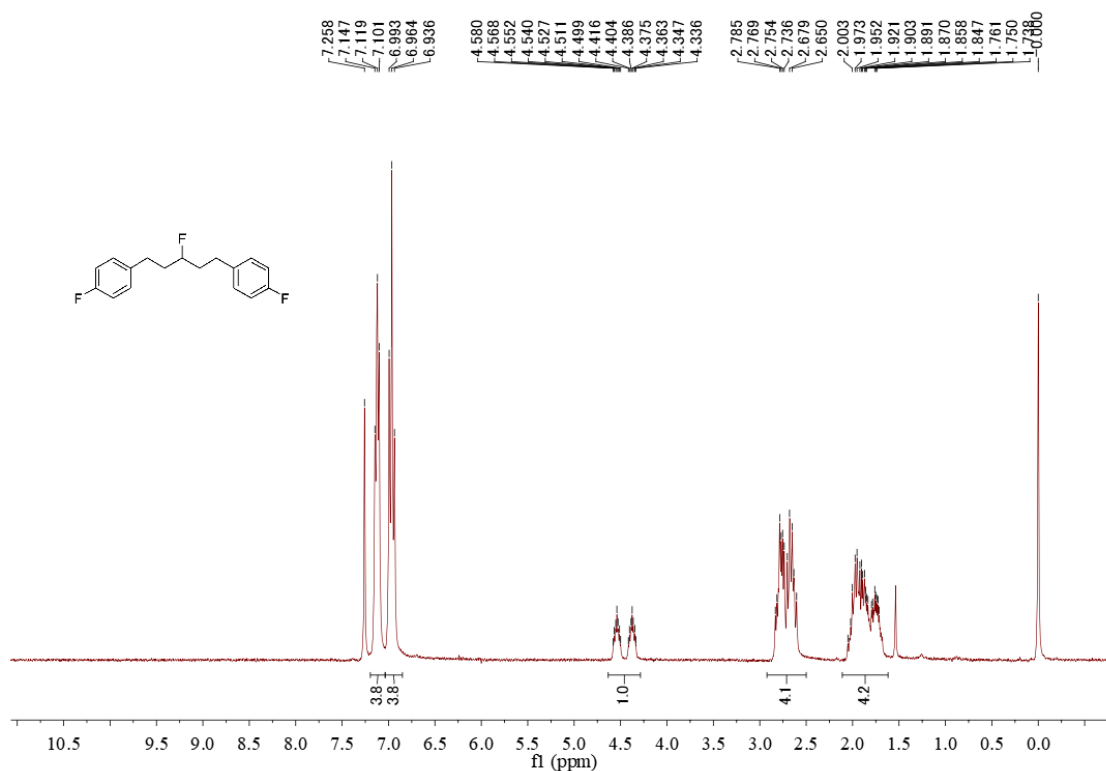

Figure S217. <sup>13</sup>C NMR spectrum of unknown secondary monofluoride **4i**, related to **Figure 3**

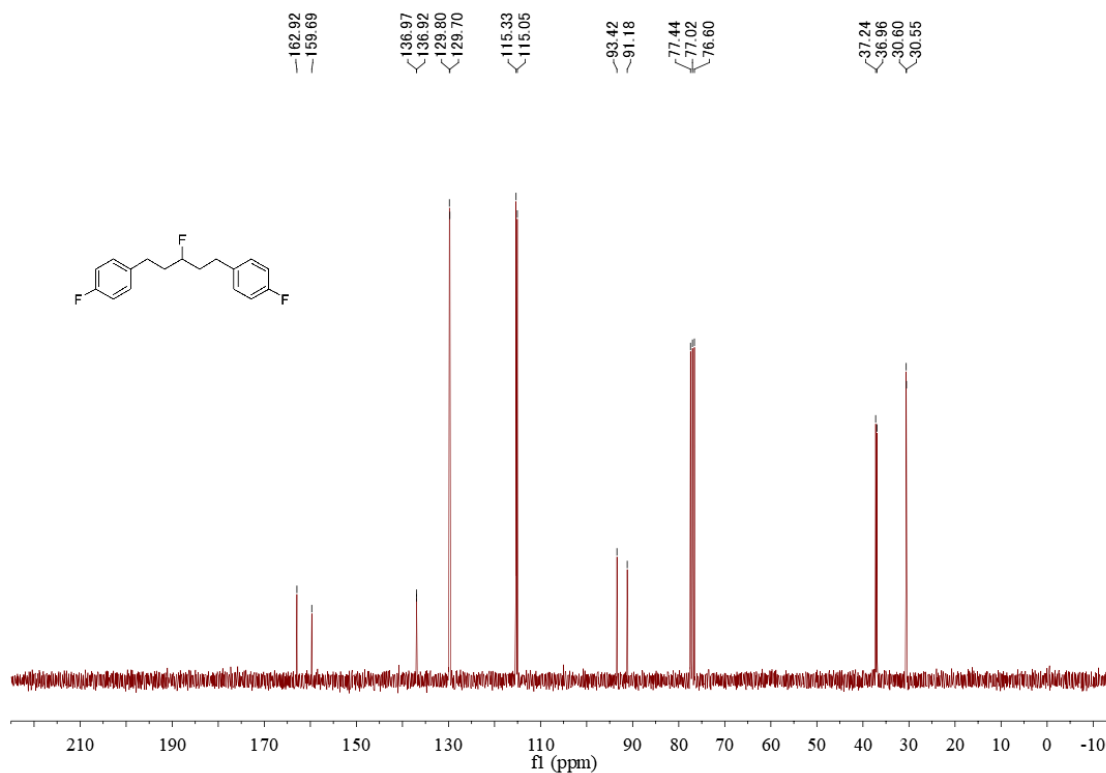

Figure S218.  $^{19}\text{F}$  NMR spectrum of unknown secondary monofluoride **4i**, related to Figure 3

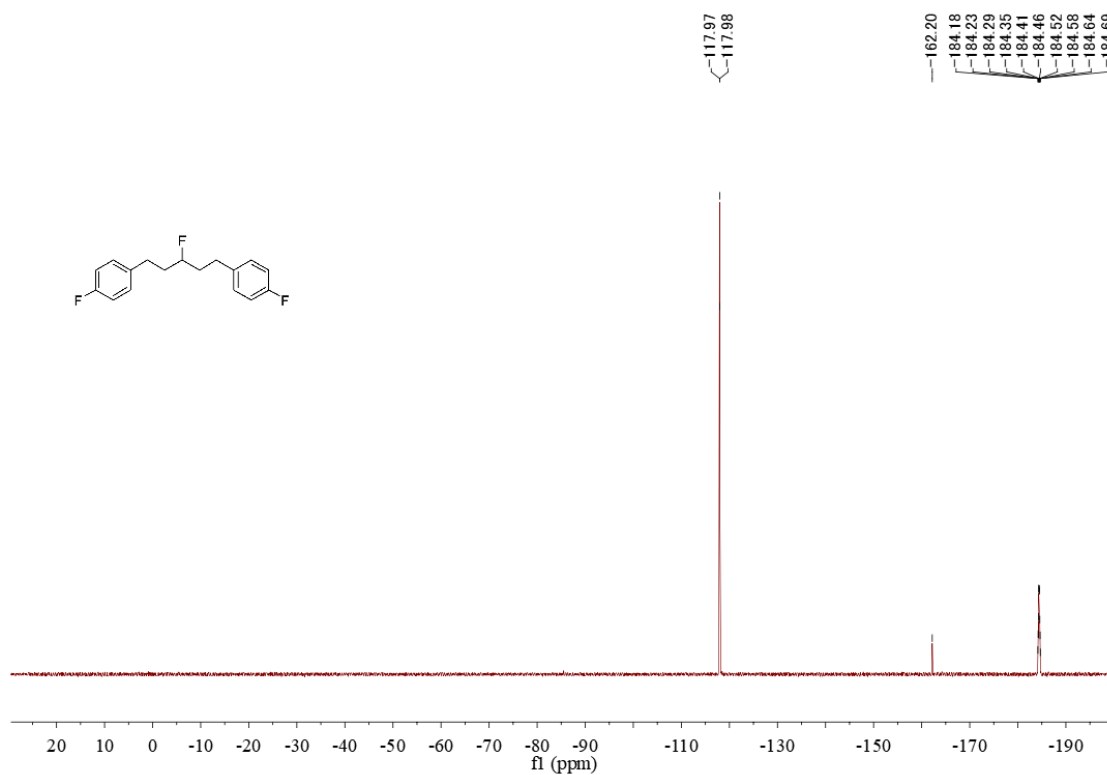

Figure S219.  $^1\text{H}$  NMR spectrum of unknown secondary monofluoride **4j**, related to Figure 3

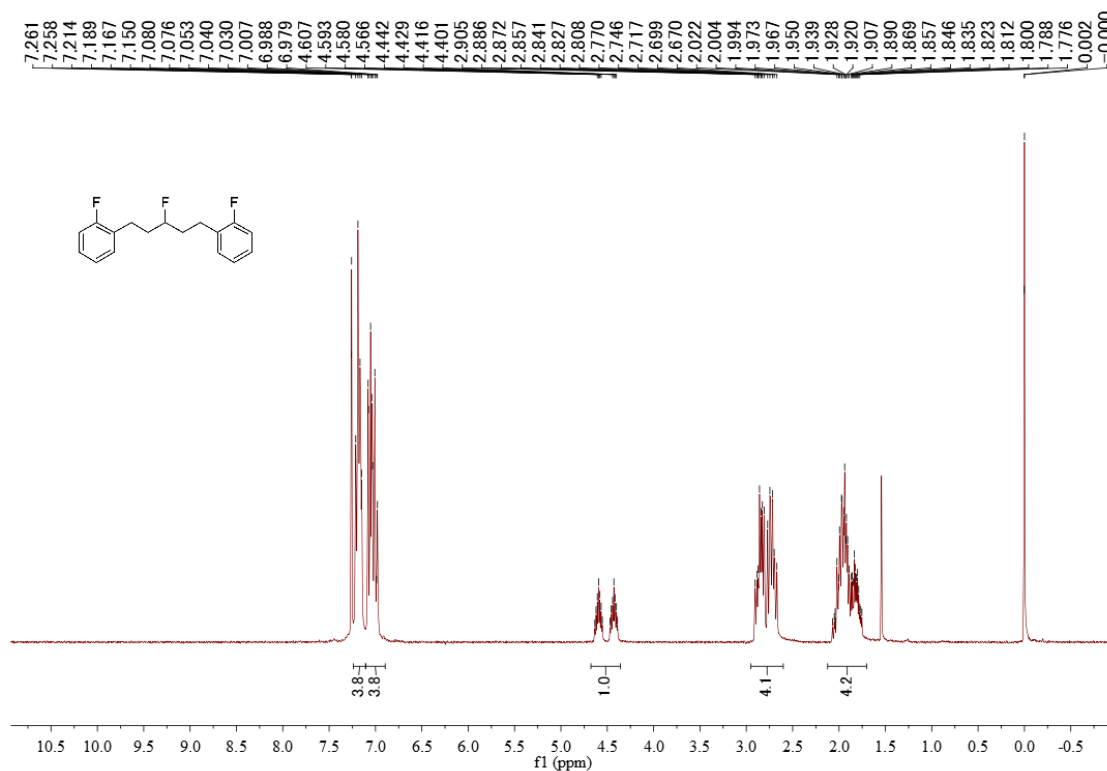



Figure S220.  $^{13}\text{C}$  NMR spectrum of unknown secondary monofluoride **4j**, related to Figure 3

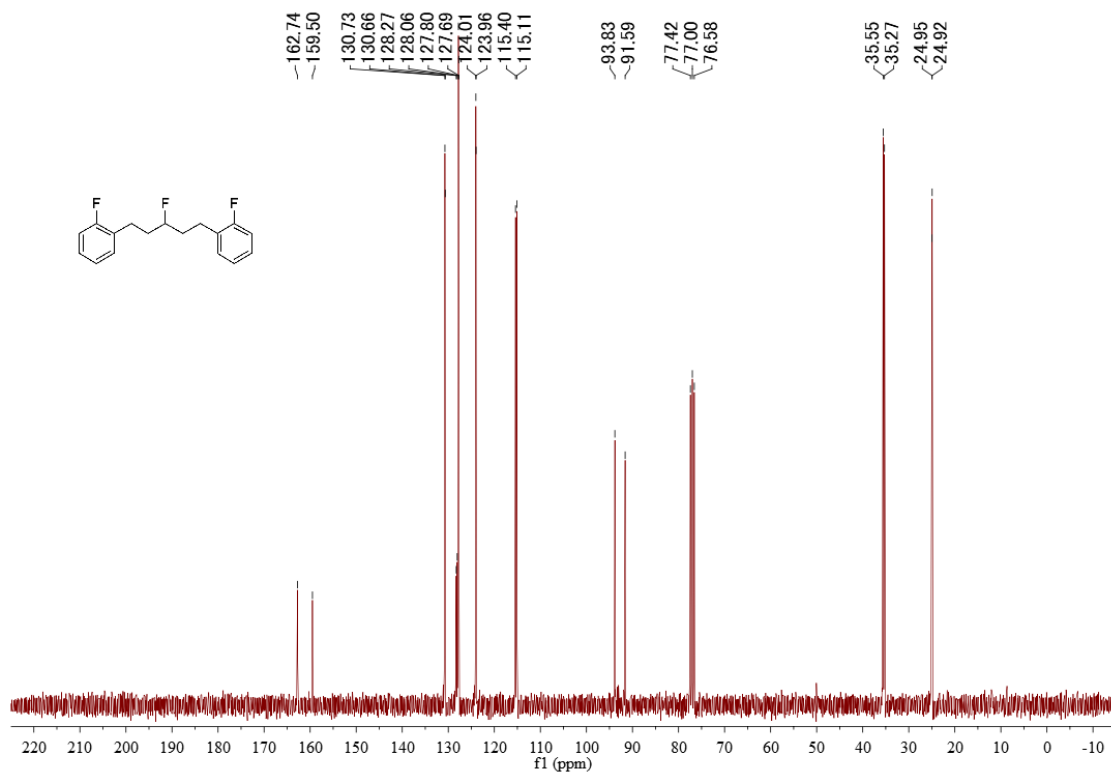

Figure S221.  $^{19}\text{F}$  NMR spectrum of unknown secondary monofluoride **4j**, related to Figure 3

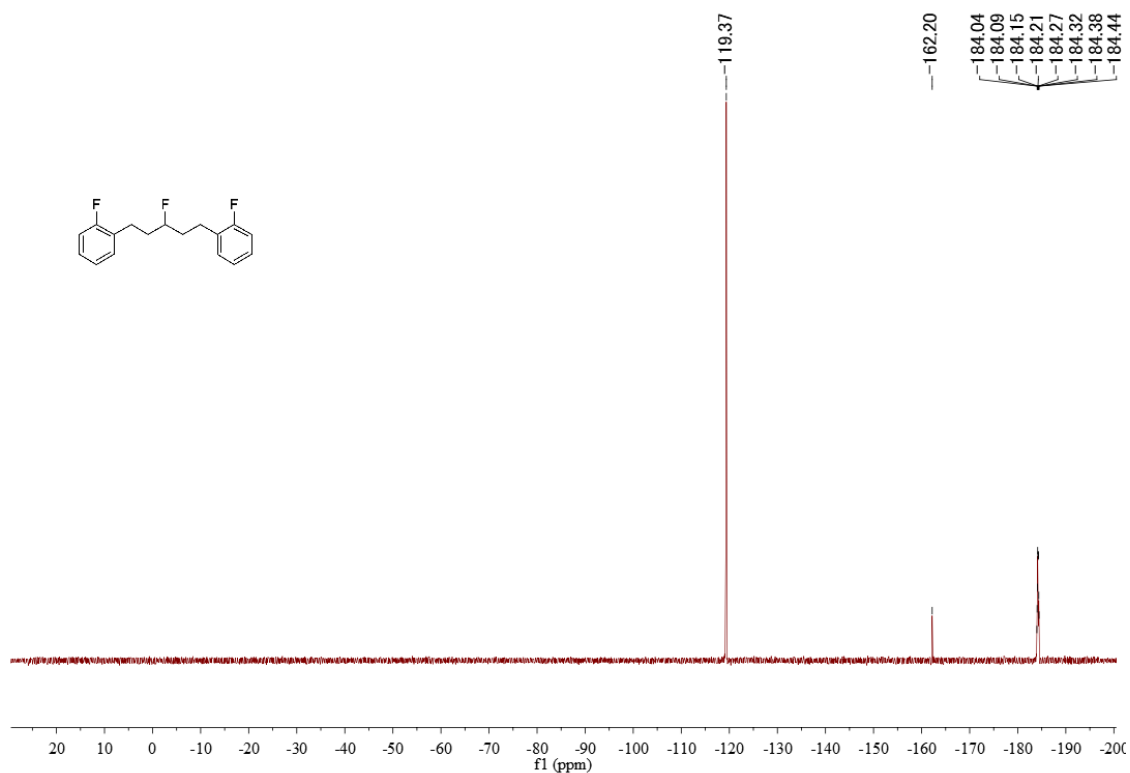

Figure S222. <sup>1</sup>H NMR spectrum of unknown secondary monofluoride **4k**, related to Figure 3

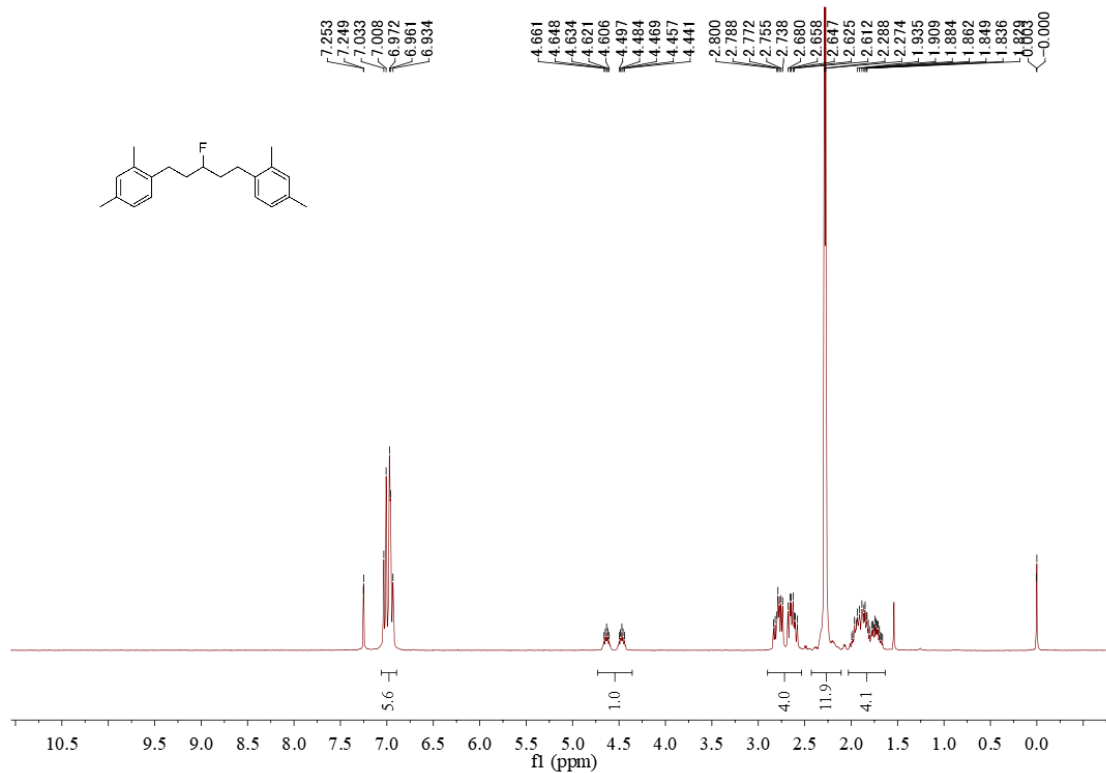

Figure S223. <sup>13</sup>C NMR spectrum of unknown secondary monofluoride **4k**, related to Figure 3

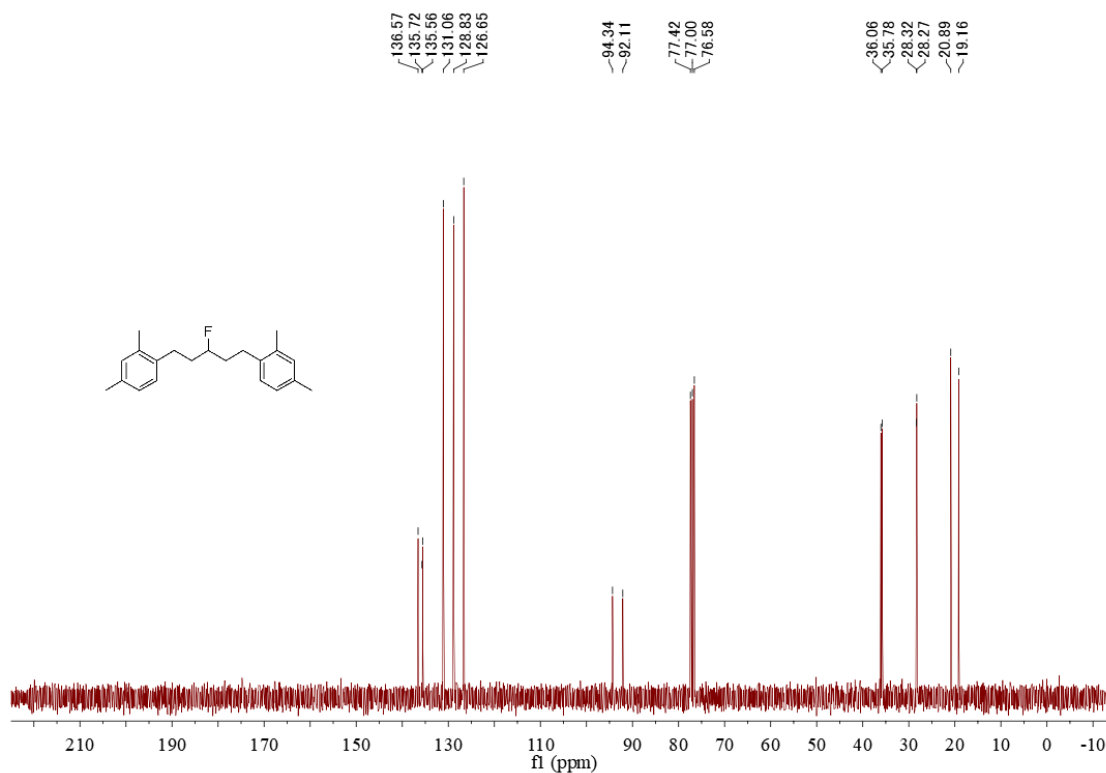

Figure S224.  $^{19}\text{F}$  NMR spectrum of unknown secondary monofluoride **4k**, related to Figure 3

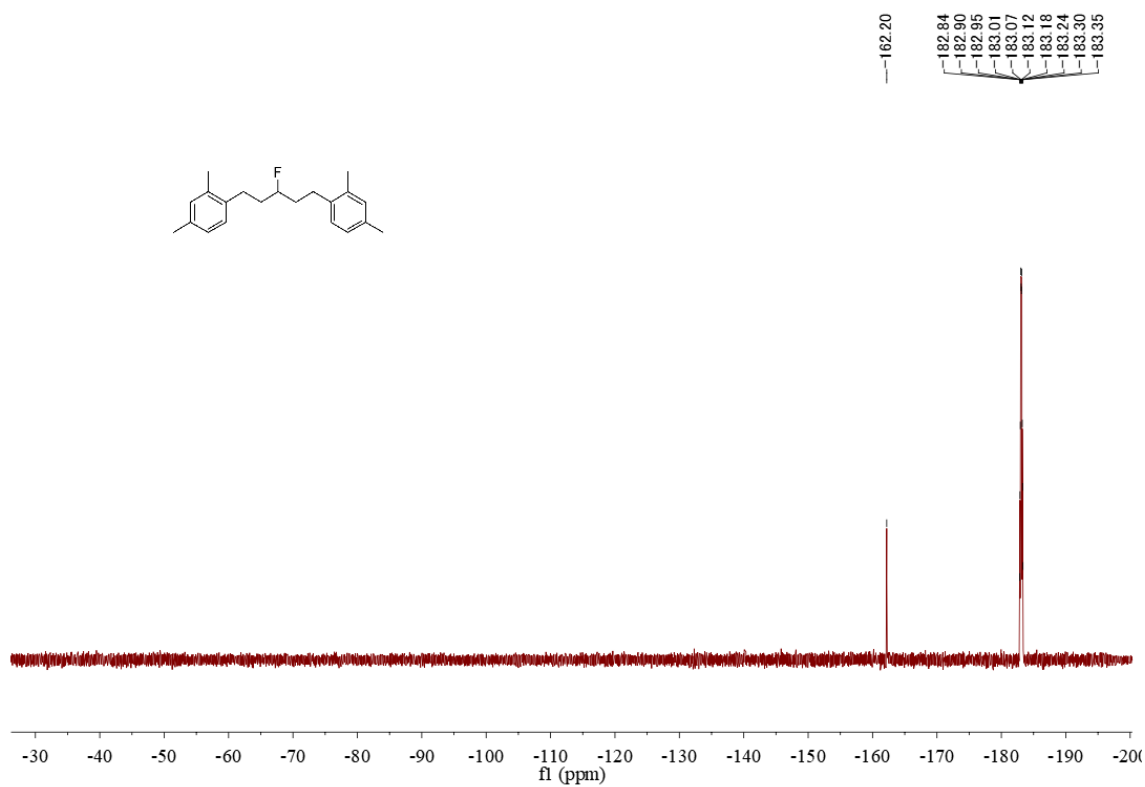

Figure S225.  $^1\text{H}$  NMR spectrum of unknown secondary monofluoride **4l**, related to Figure 3

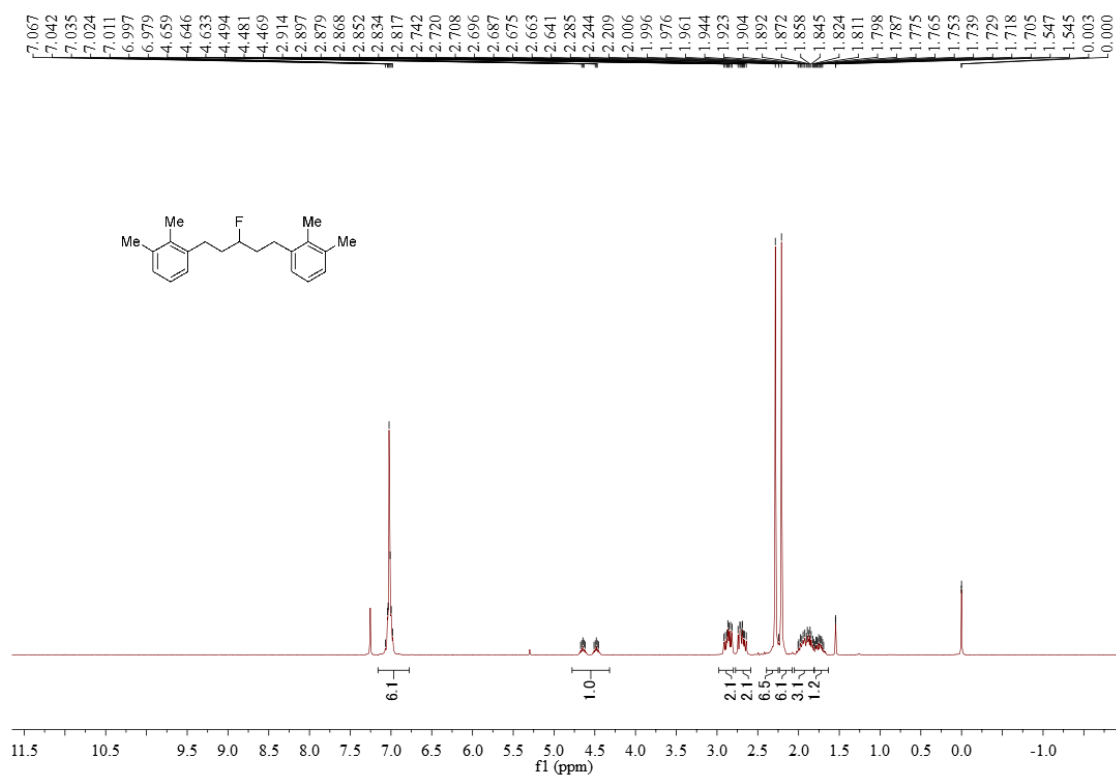

Figure S226.  $^{13}\text{C}$  NMR spectrum of unknown secondary monofluoride **4I**, related to **Figure 3**

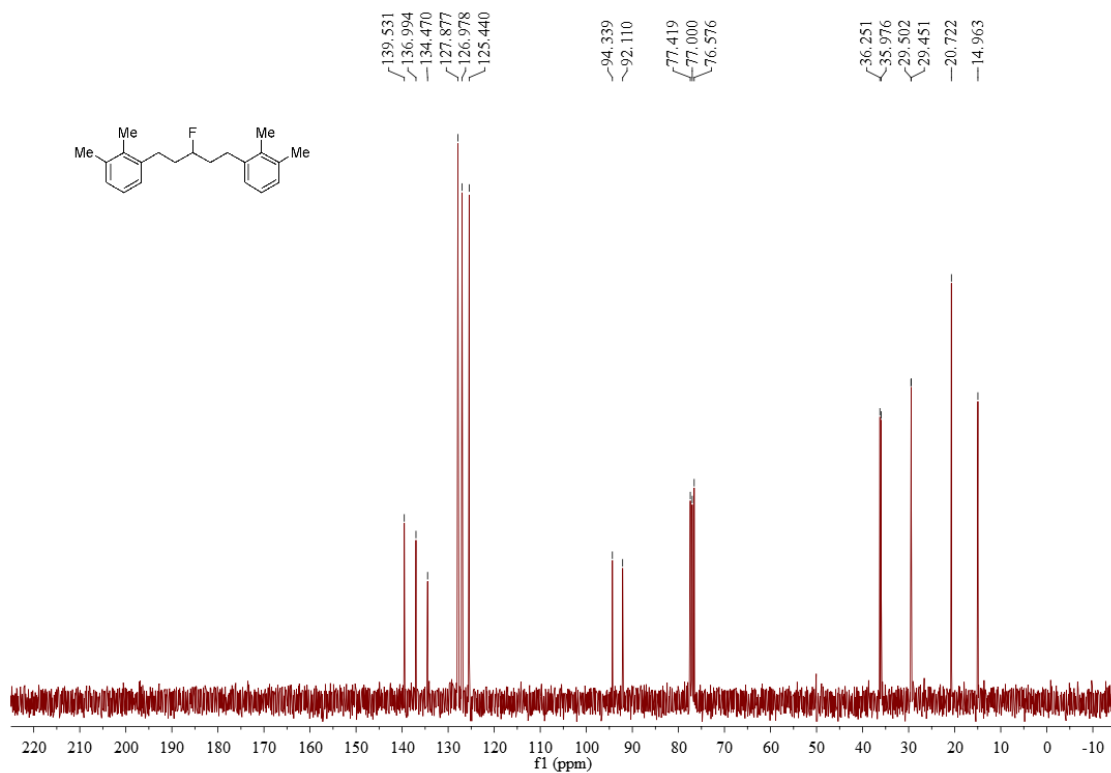

Figure S227.  $^{19}\text{F}$  NMR spectrum of unknown secondary monofluoride **4I**, related to **Figure 3**

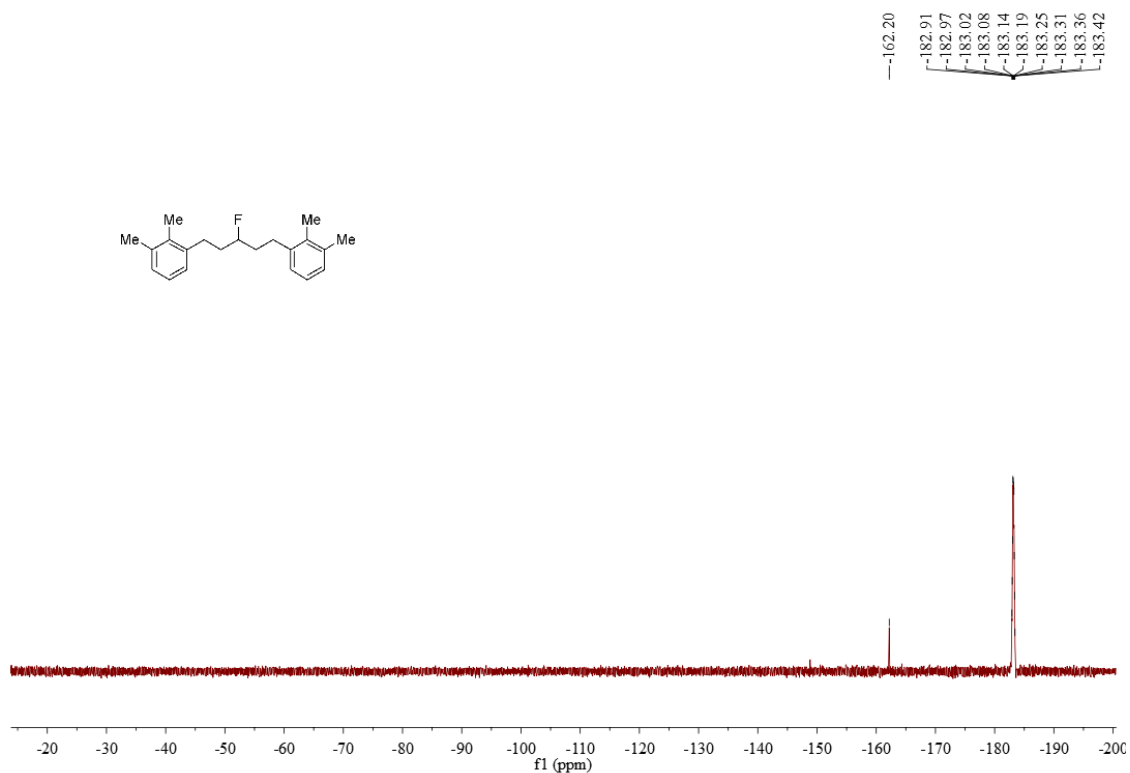

Figure S228. <sup>1</sup>H NMR spectrum of unknown secondary monofluoride **4m**, related to Figure 3

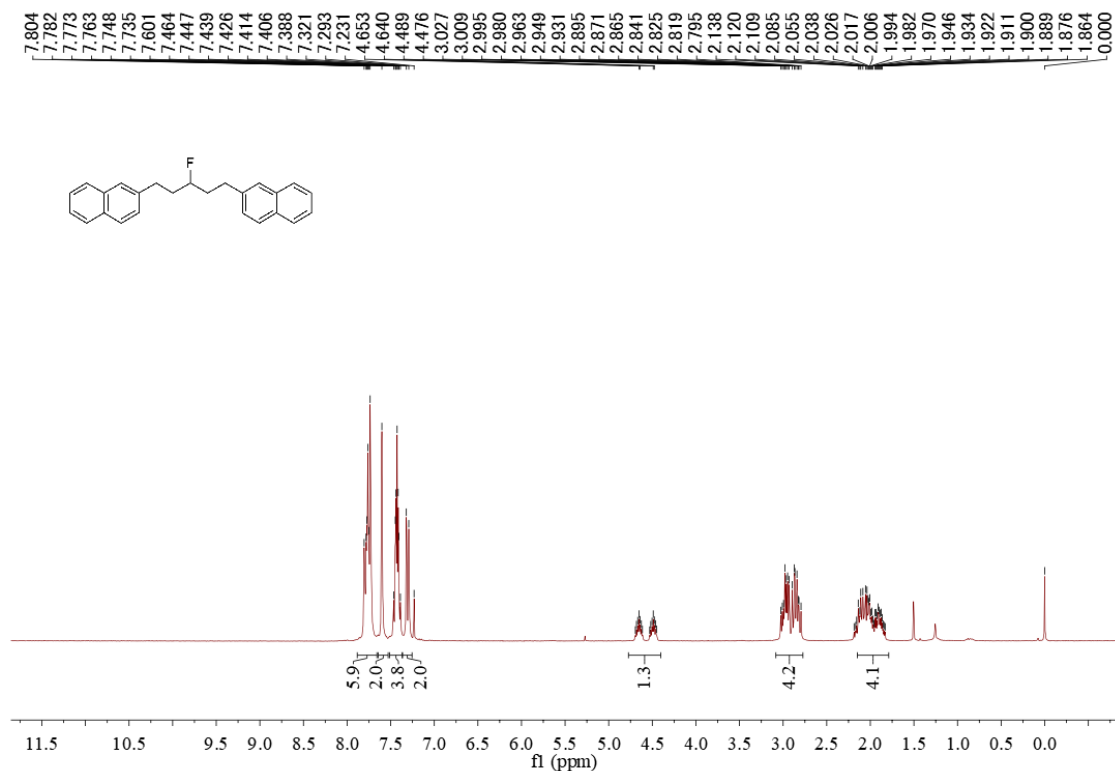

Figure S229. <sup>13</sup>C NMR spectrum of unknown secondary monofluoride **4m**, related to Figure 3

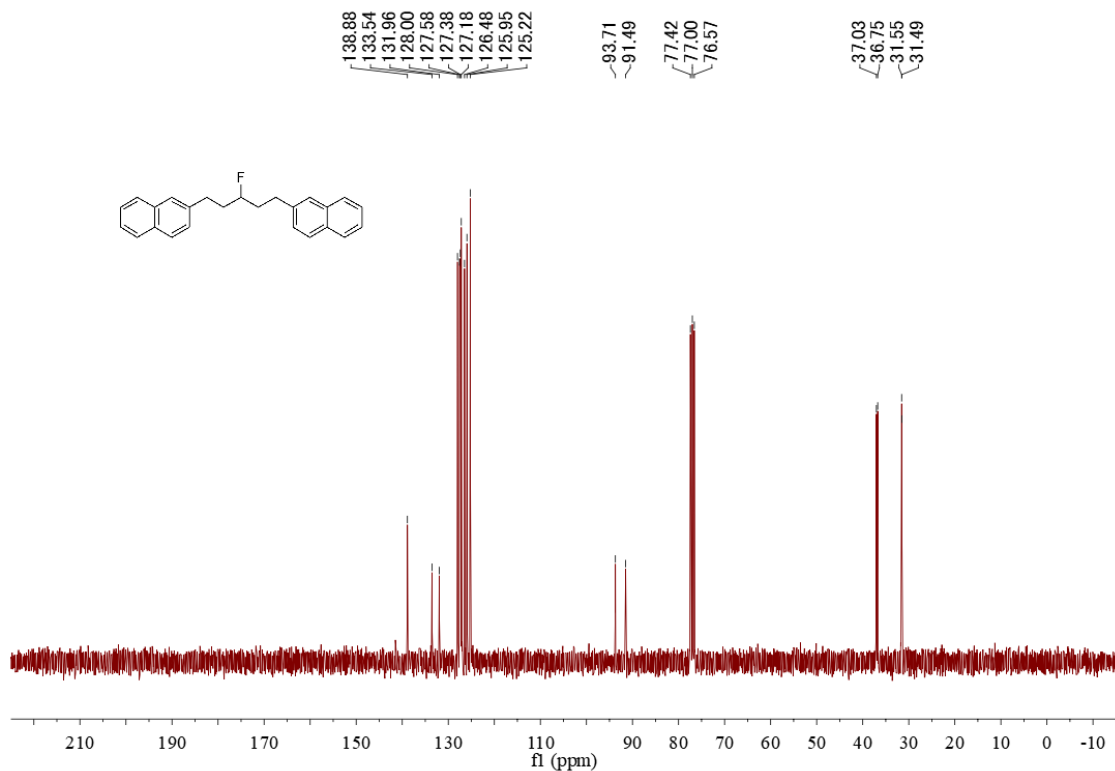

Figure S230.  $^{19}\text{F}$  NMR spectrum of unknown secondary monofluoride **4m**, related to Figure 3

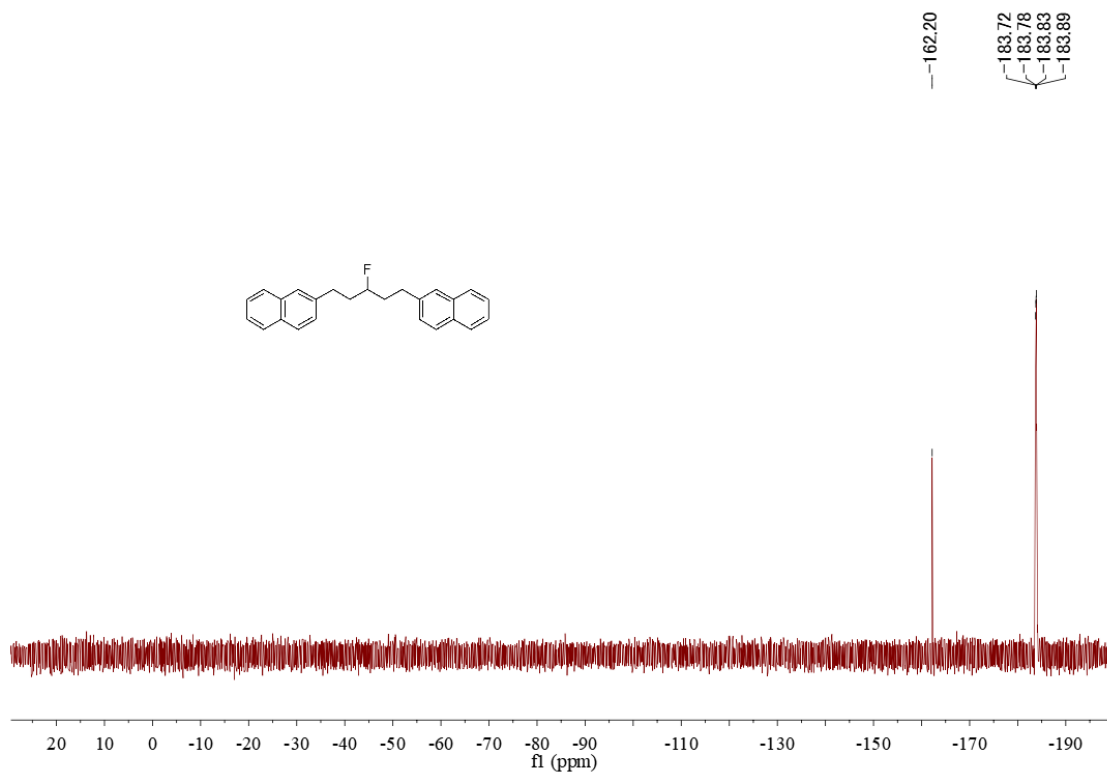

Figure S231.  $^1\text{H}$  NMR spectrum of unknown secondary monofluoride **4n**, related to Figure 3

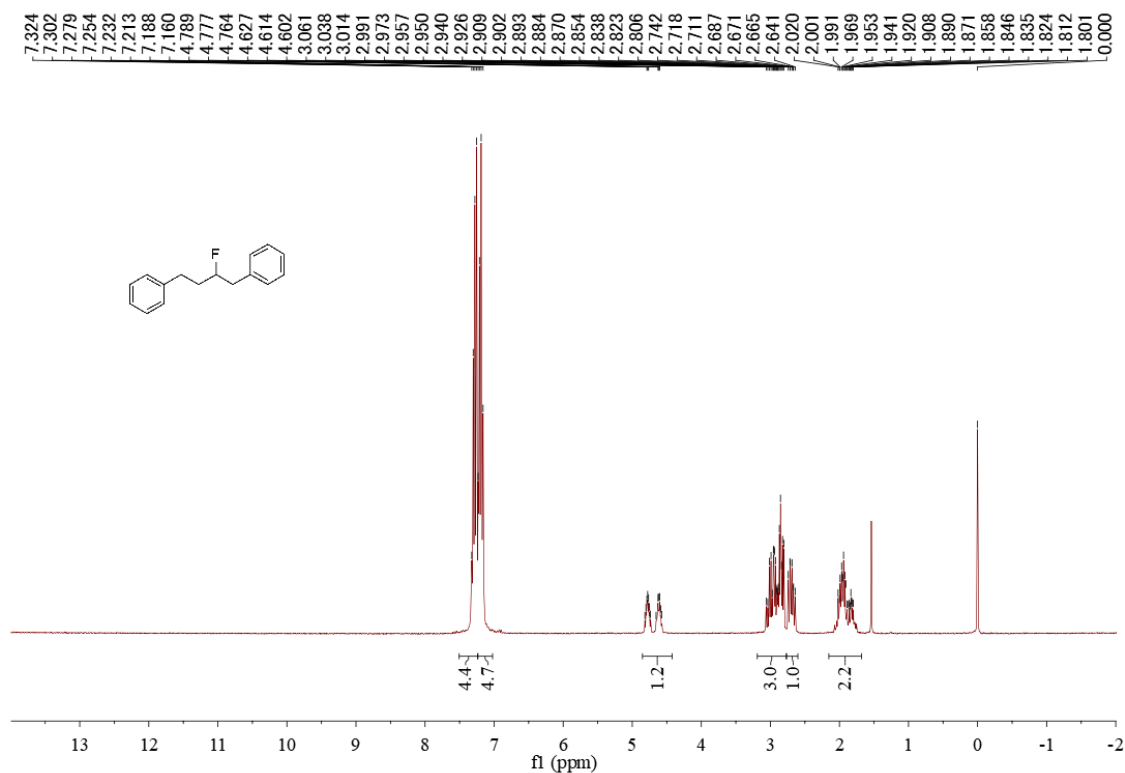

Figure S232.  $^{13}\text{C}$  NMR spectrum of unknown secondary monofluoride **4n**, related to Figure 3

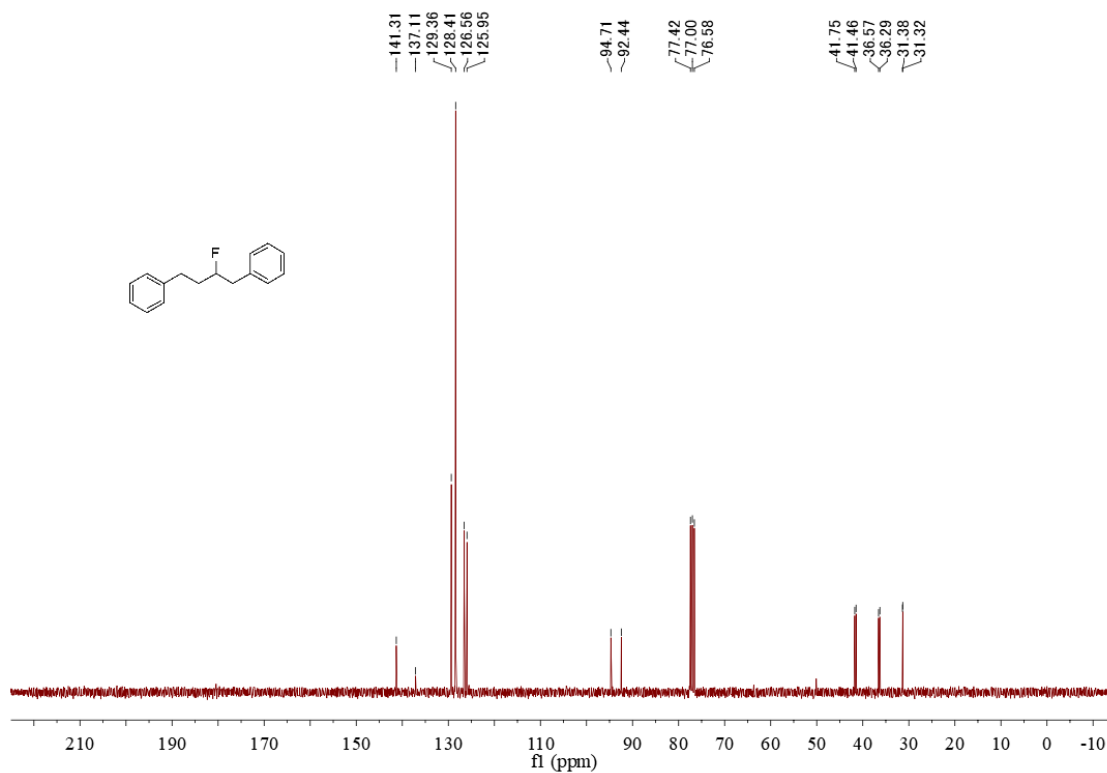

Figure S233.  $^{19}\text{F}$  NMR spectrum of unknown secondary monofluoride **4n**, related to Figure 3

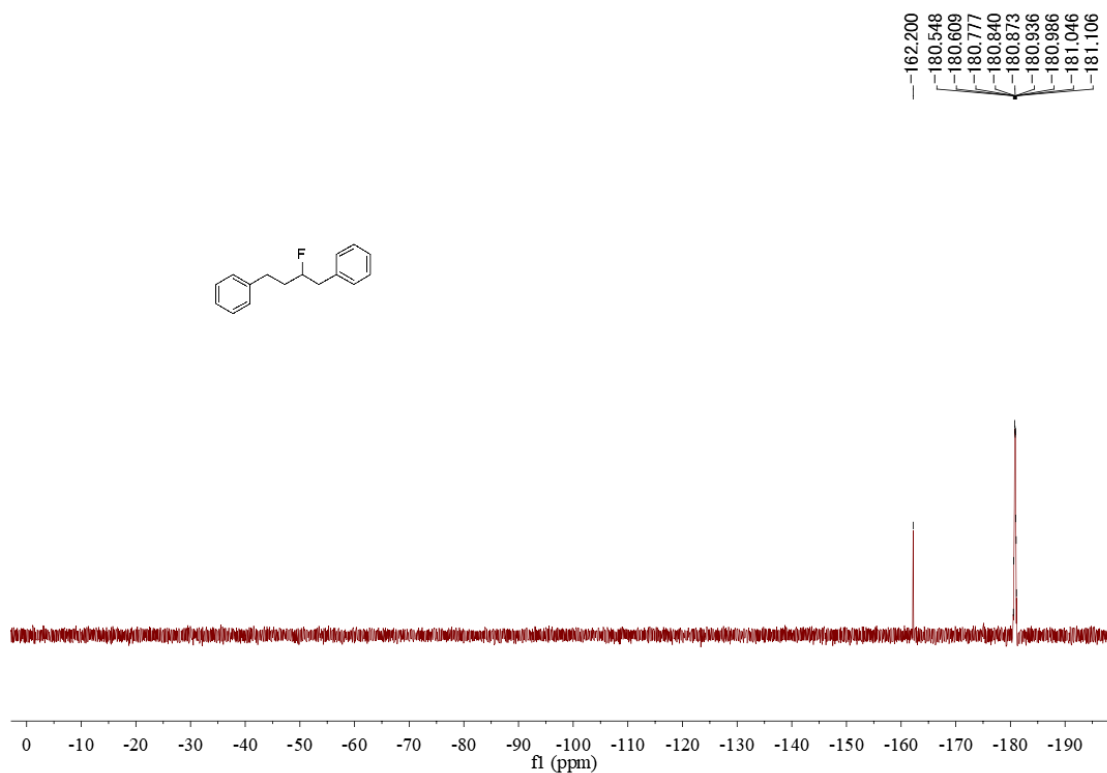

Figure S234. <sup>1</sup>H NMR spectrum of unknown secondary monofluoride **4p**, related to Figure 3

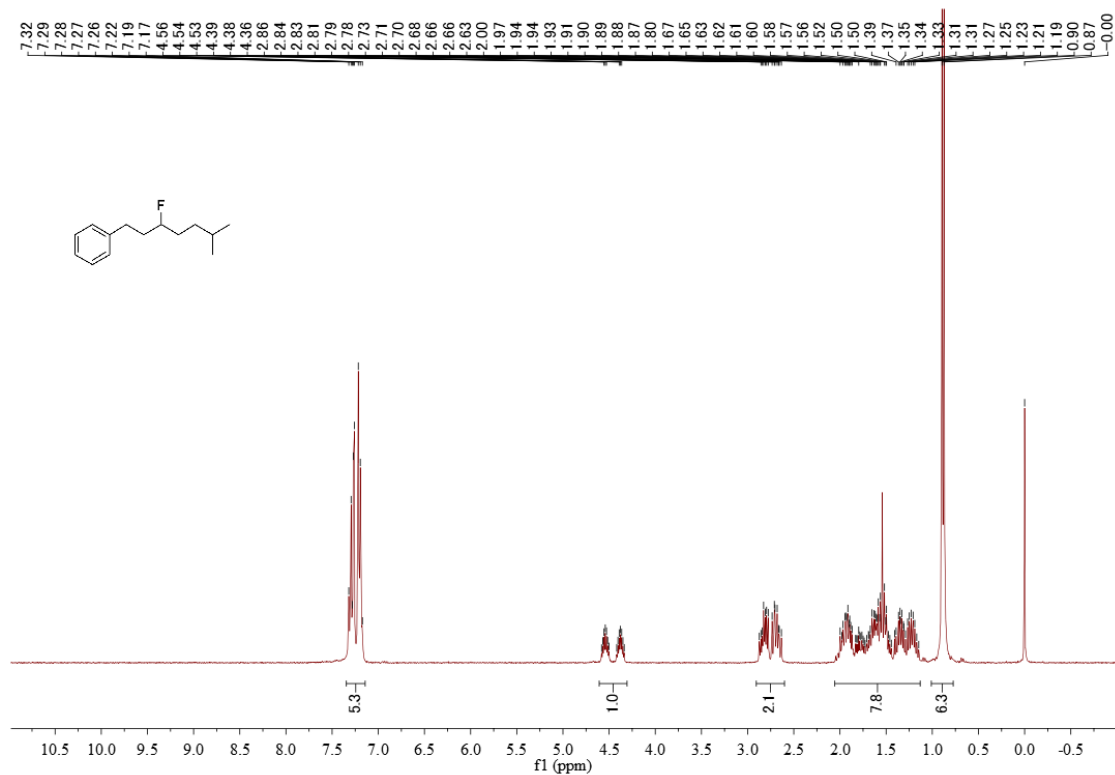

Figure S235. <sup>13</sup>C NMR spectrum of unknown secondary monofluoride **4p**, related to Figure 3

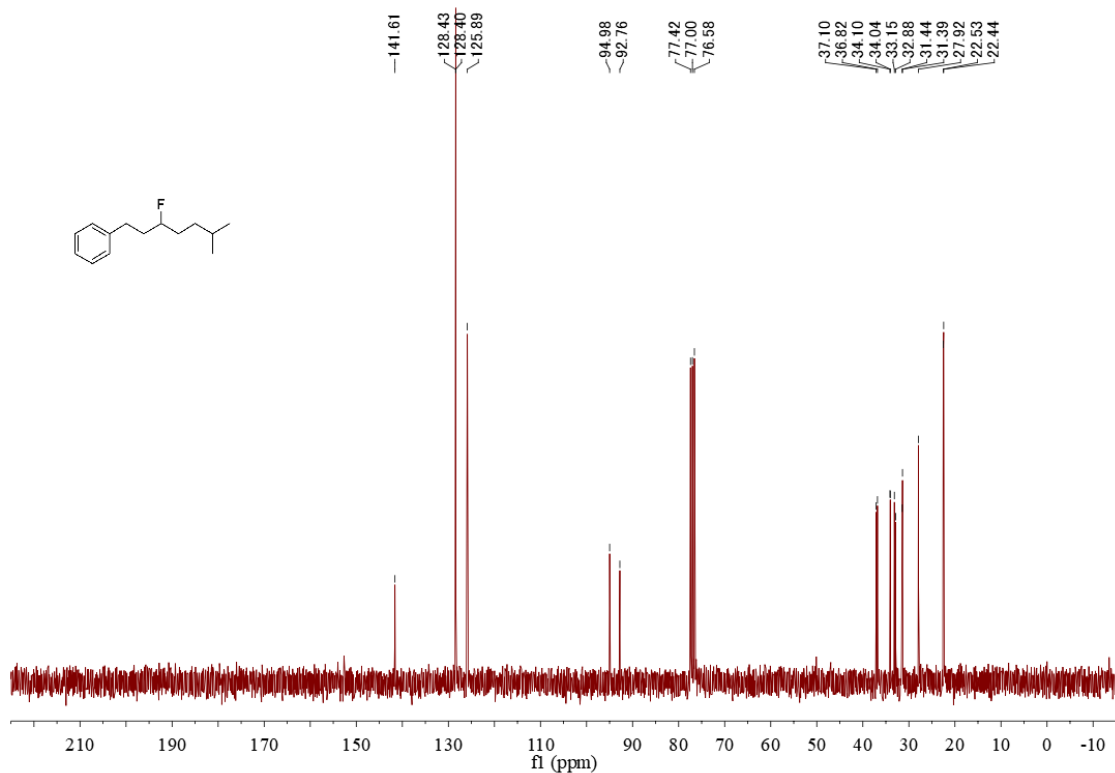



Figure S236.  $^{19}\text{F}$  NMR spectrum of unknown secondary monofluoride **4p**, related to Figure 3

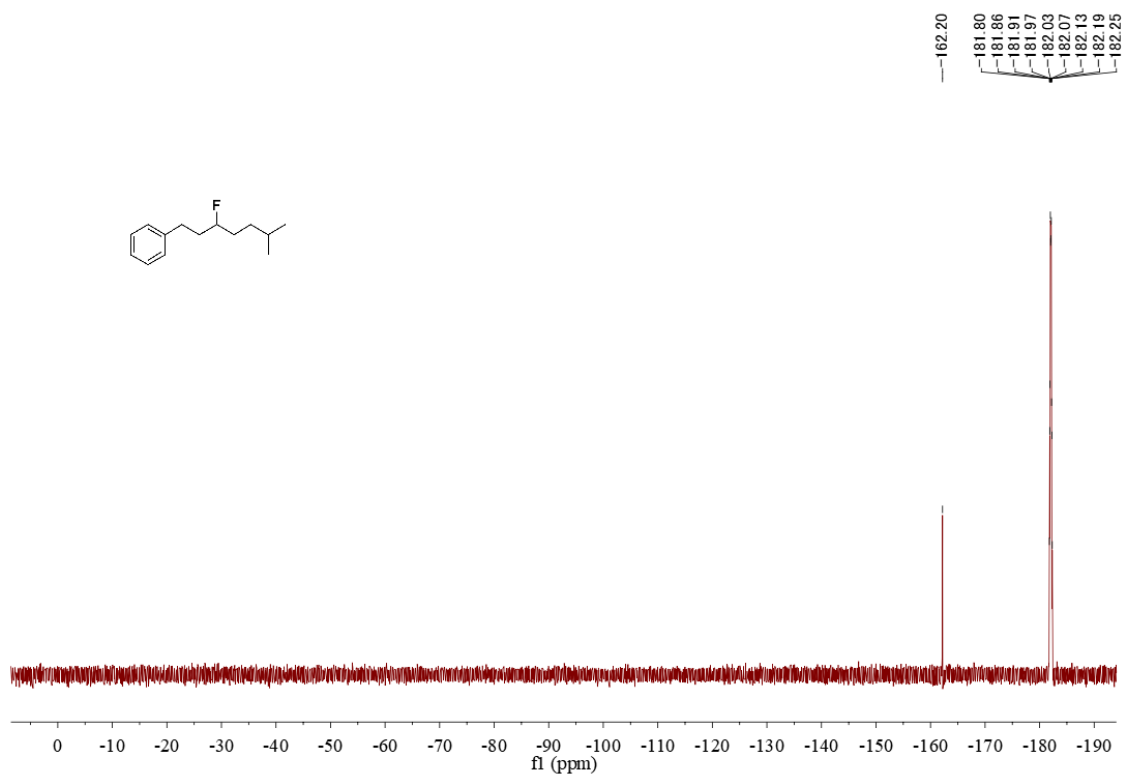

Figure S237.  $^1\text{H}$  NMR spectrum of unknown secondary monofluoride **4r**, related to Figure 3

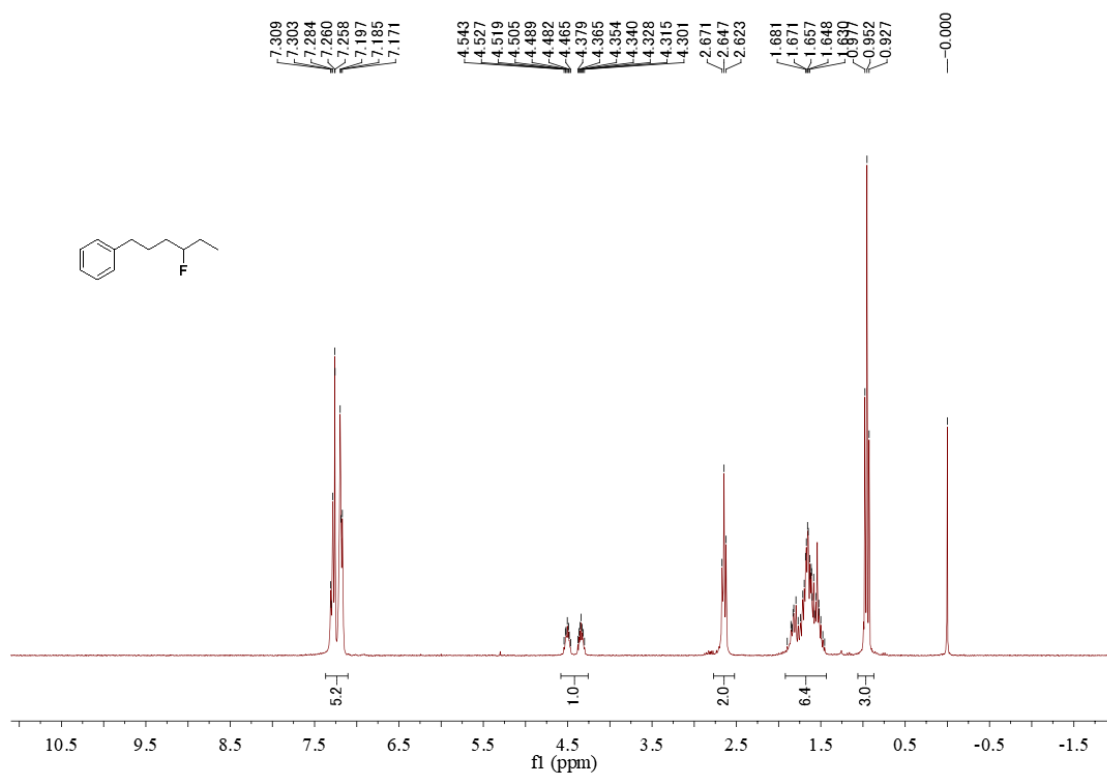

Figure S238.  $^{13}\text{C}$  NMR spectrum of unknown secondary monofluoride **4r**, related to Figure 3

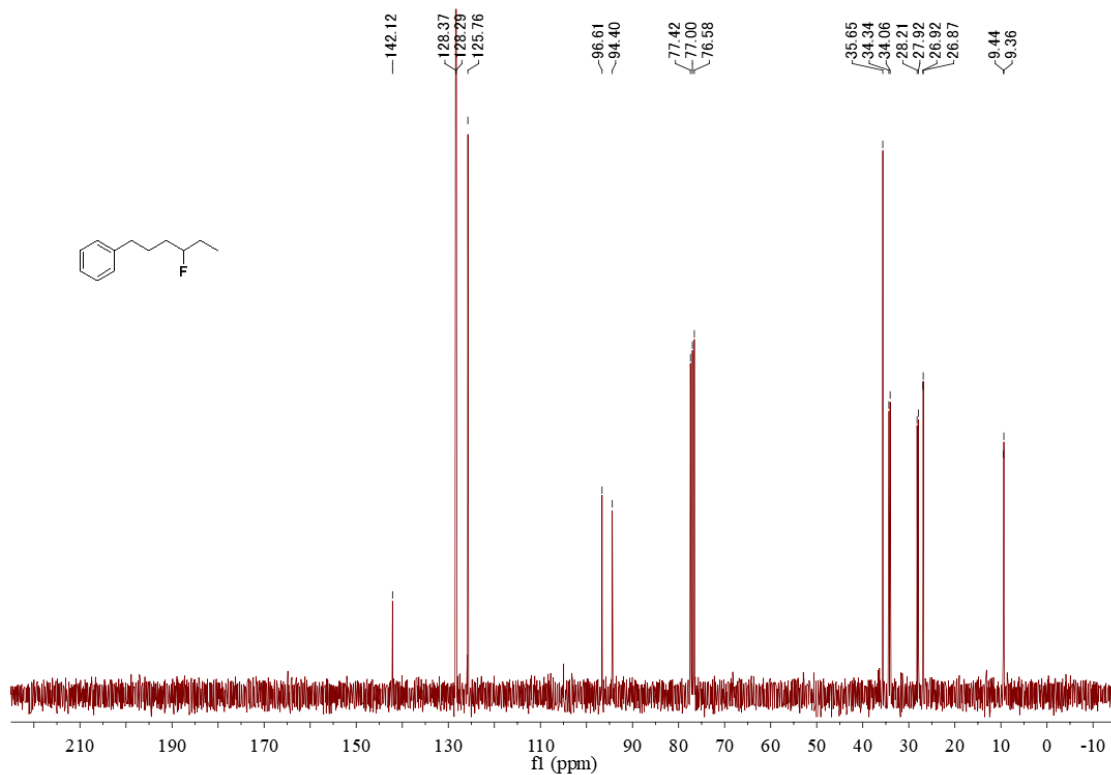

Figure S239.  $^{19}\text{F}$  NMR spectrum of unknown secondary monofluoride **4r**, related to Figure 3

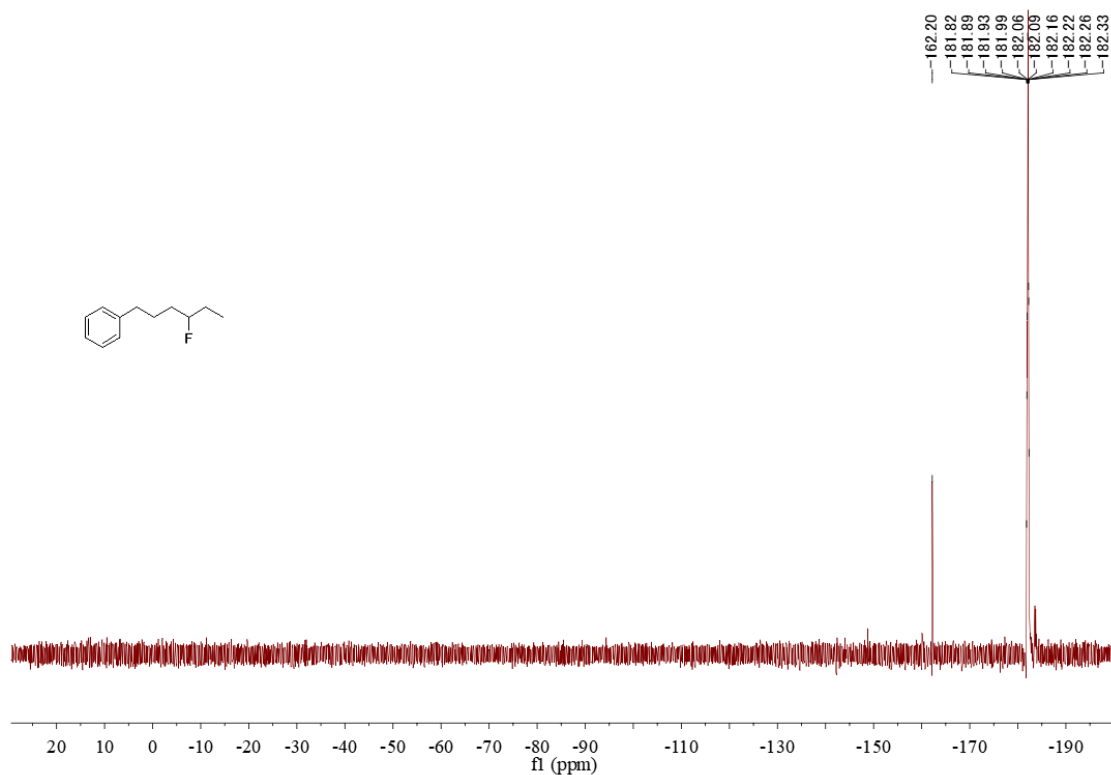

Figure S240. <sup>1</sup>H NMR spectrum of unknown secondary monofluoride **4s**, related to **Figure 3**

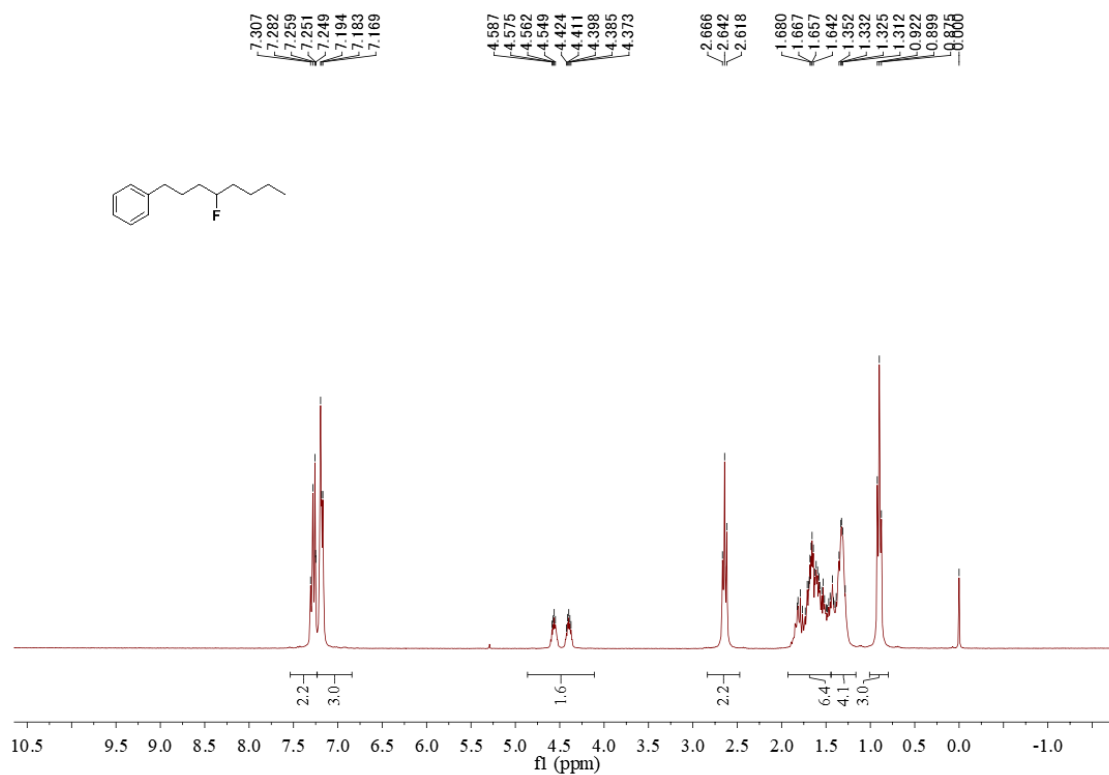

Figure S241. <sup>13</sup>C NMR spectrum of unknown secondary monofluoride **4s**, related to **Figure 3**

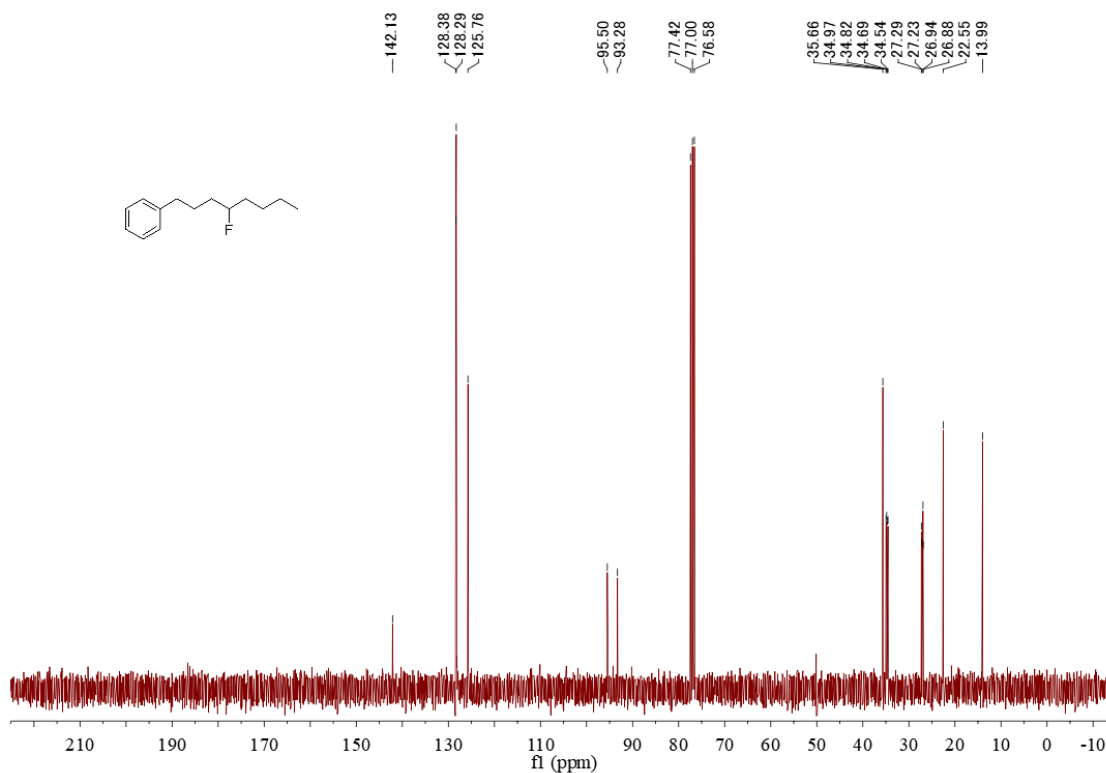

Figure S242.  $^{19}\text{F}$  NMR spectrum of unknown secondary monofluoride **4s**, related to Figure 3

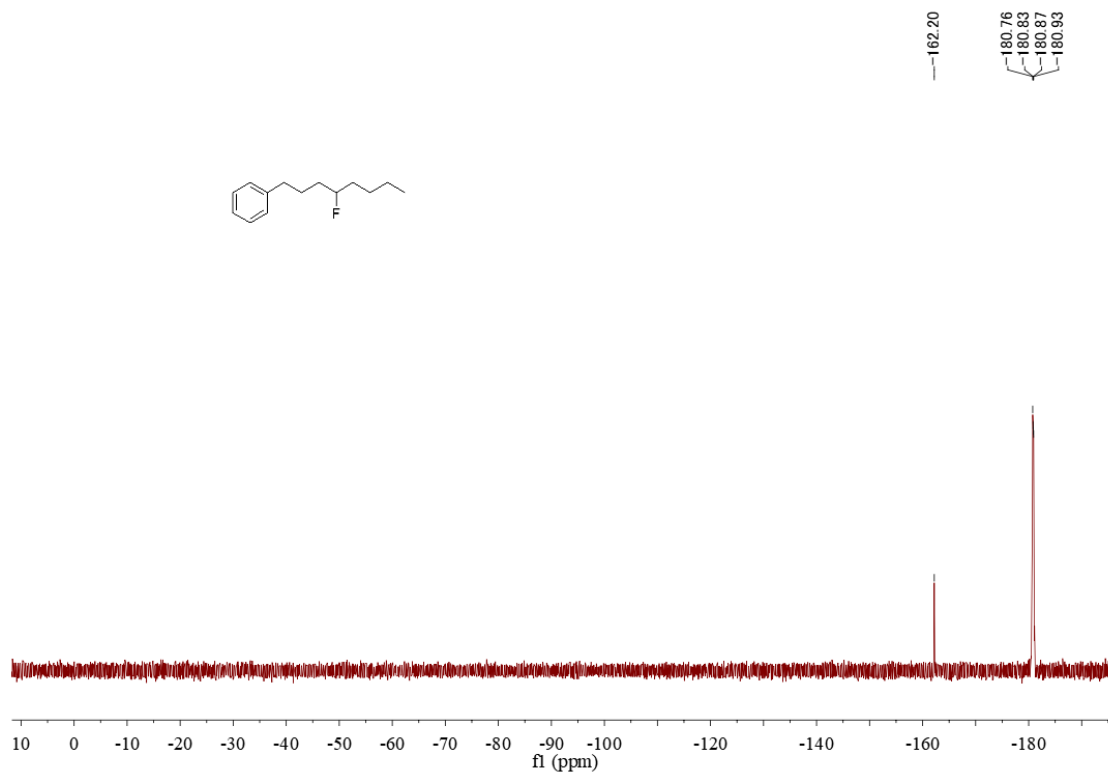

**Figure S243.**  $^1\text{H-NMR}$  spectra copy of crude reaction mixture: Using  $(\text{CF}_3)_2\text{CHOH}$  as purchased without precaution to exclude moisture, related to **Table 1** (entry 7)

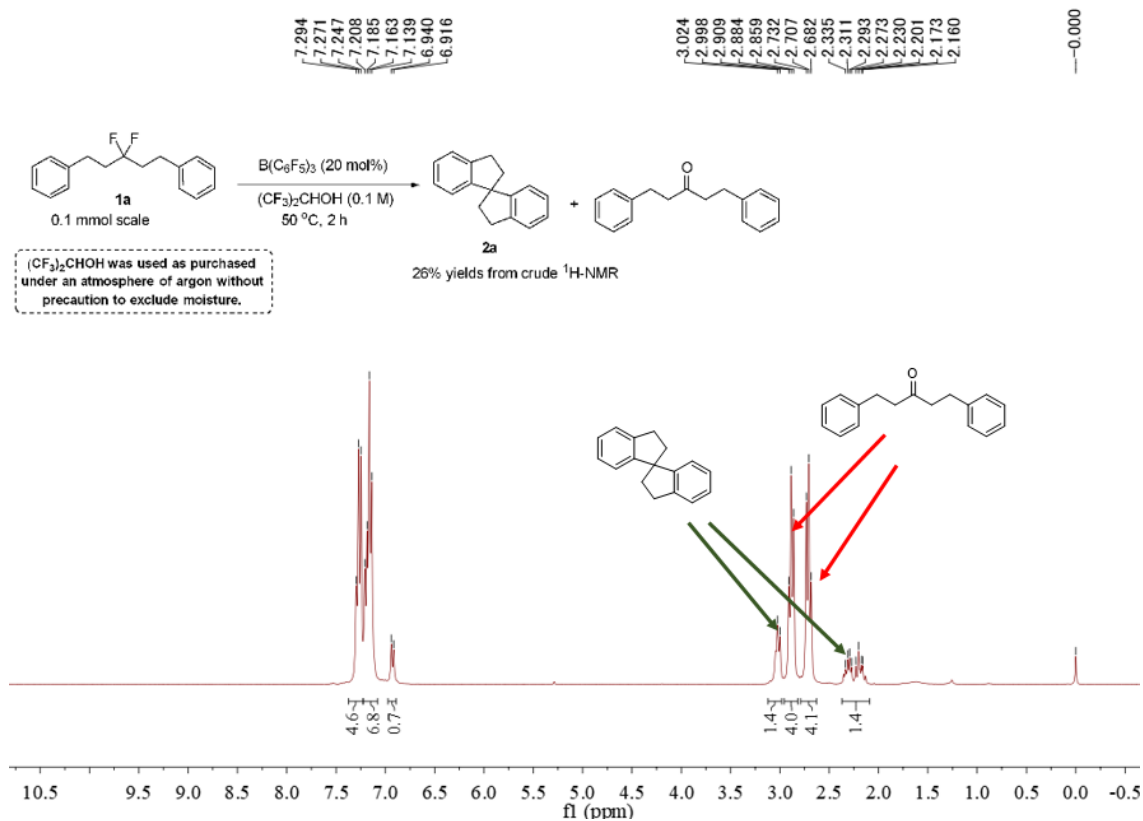

Figure S244. <sup>1</sup>H-NMR spectrum of **1v**, related to Table 2

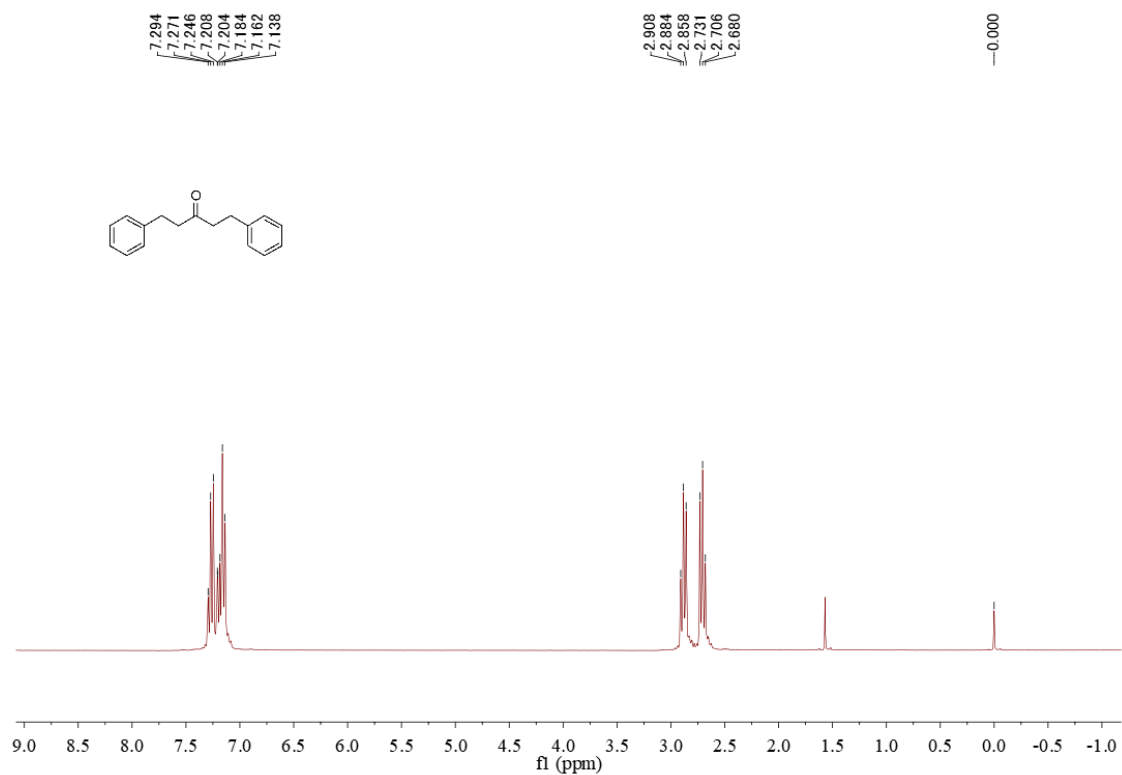

Figure S245. <sup>1</sup>H-NMR spectrum of **1w**, related to Table 2

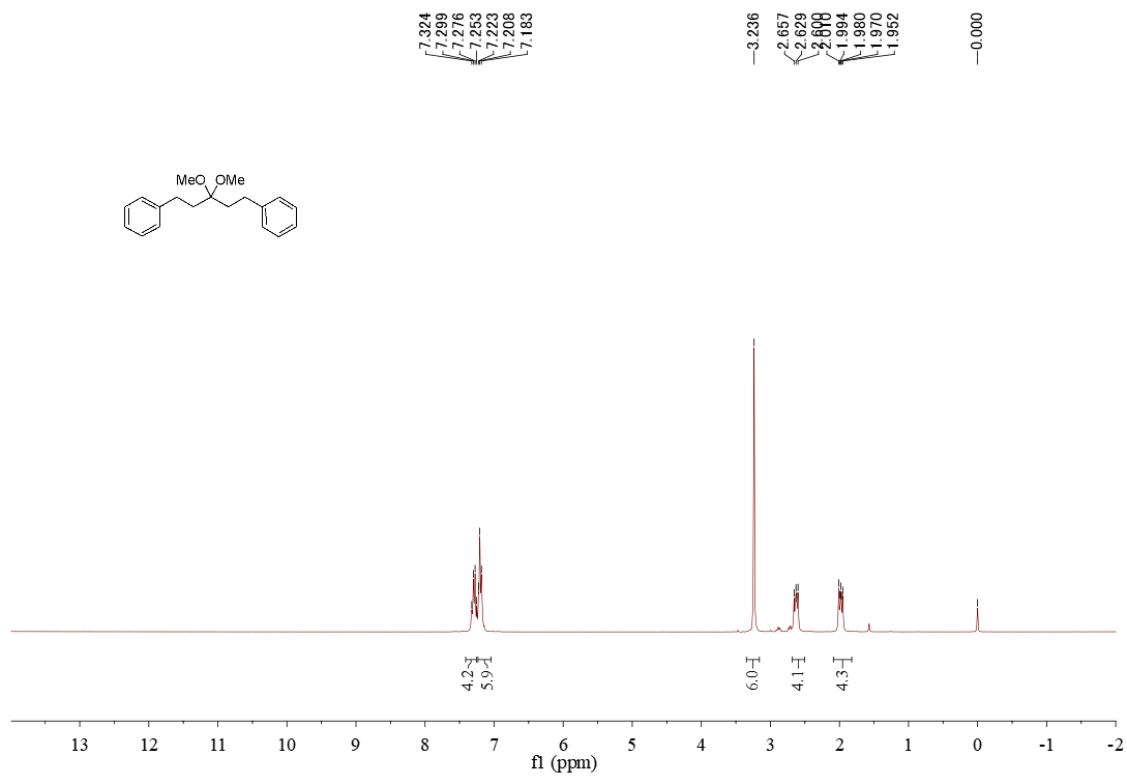

Figure S246. <sup>1</sup>H-NMR spectrum of **1x**, related to Table 2

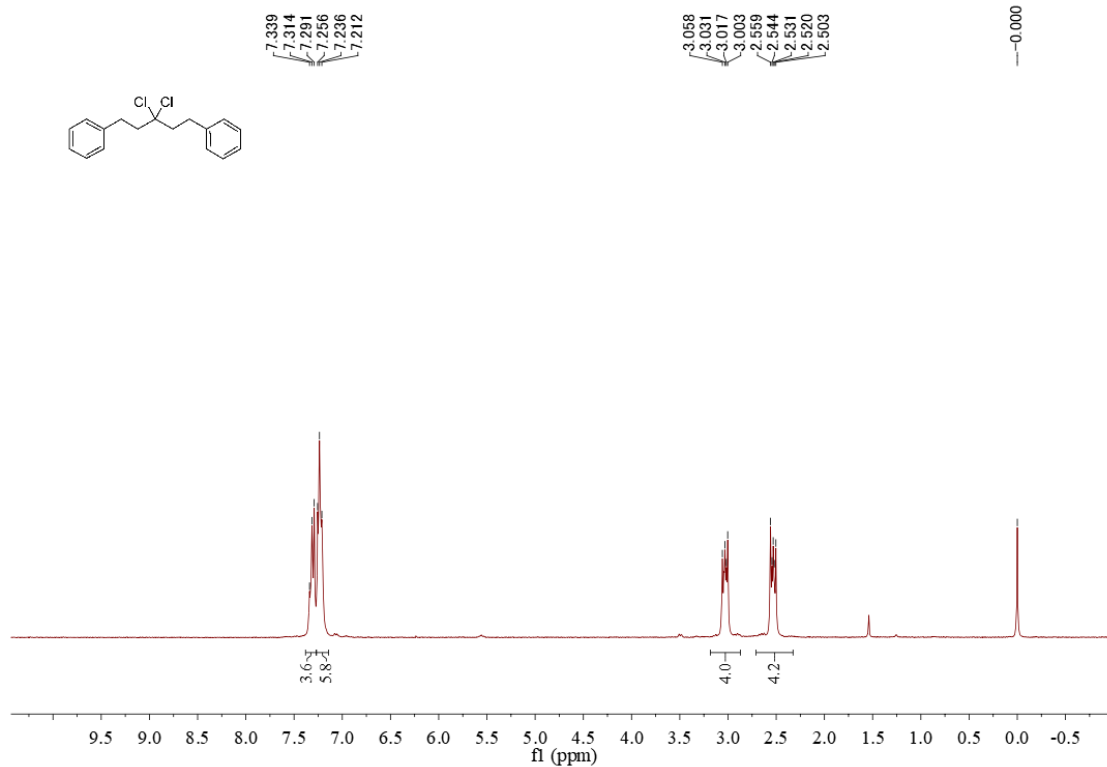

Figure S247. <sup>1</sup>H-NMR spectrum of **1y**, related to Table 2

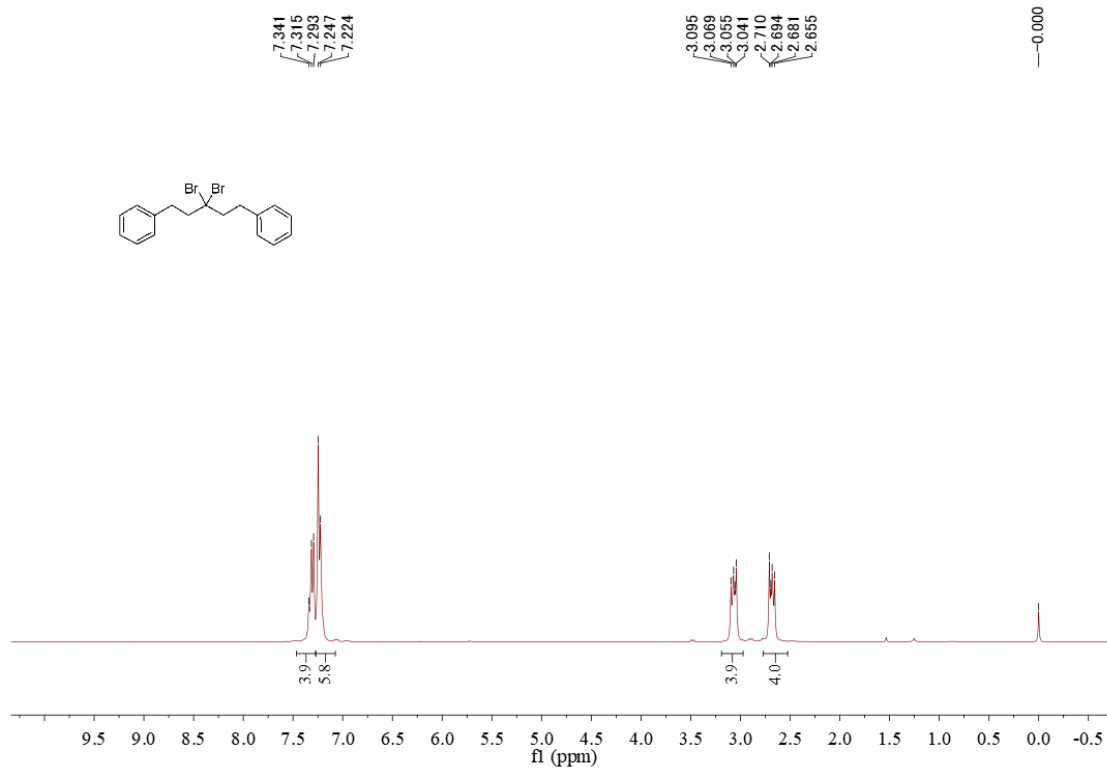

Figure S248. <sup>1</sup>H-NMR spectrum of **3x**, related to Table 2

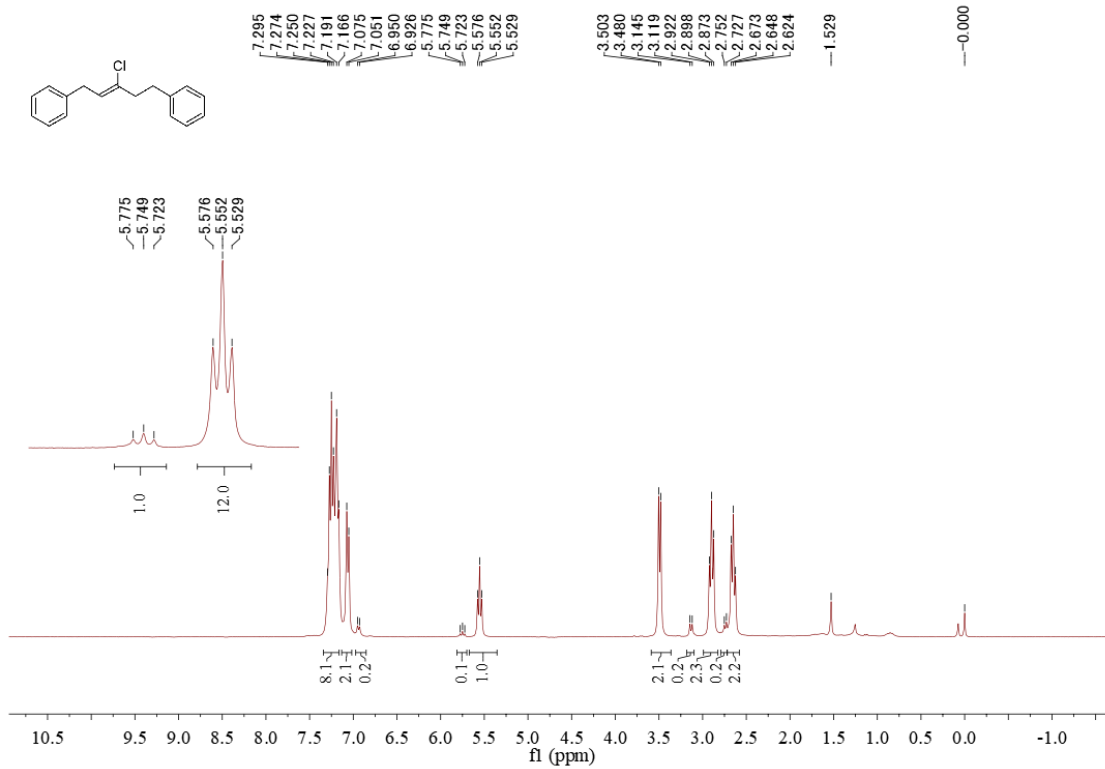

Figure S249. <sup>1</sup>H-NMR spectrum of **3y**, related to Table 2

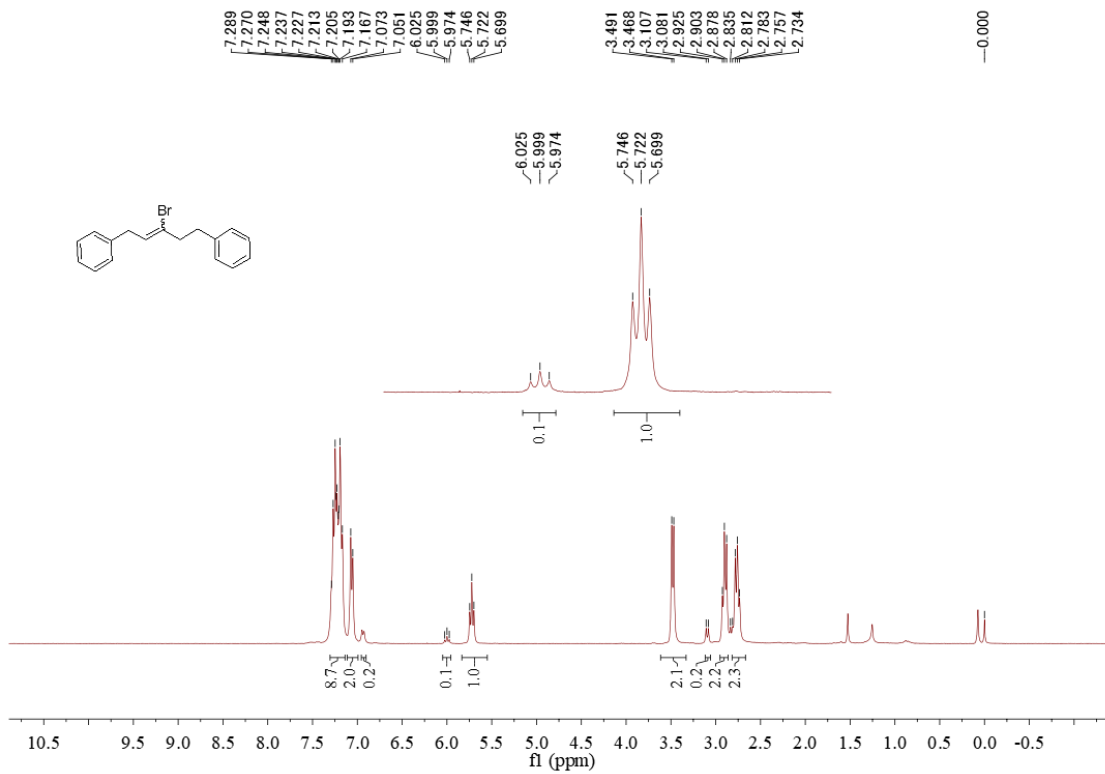



Figure S250.  $^{13}\text{C}$ -NMR spectrum of **3y**, related to Table 2

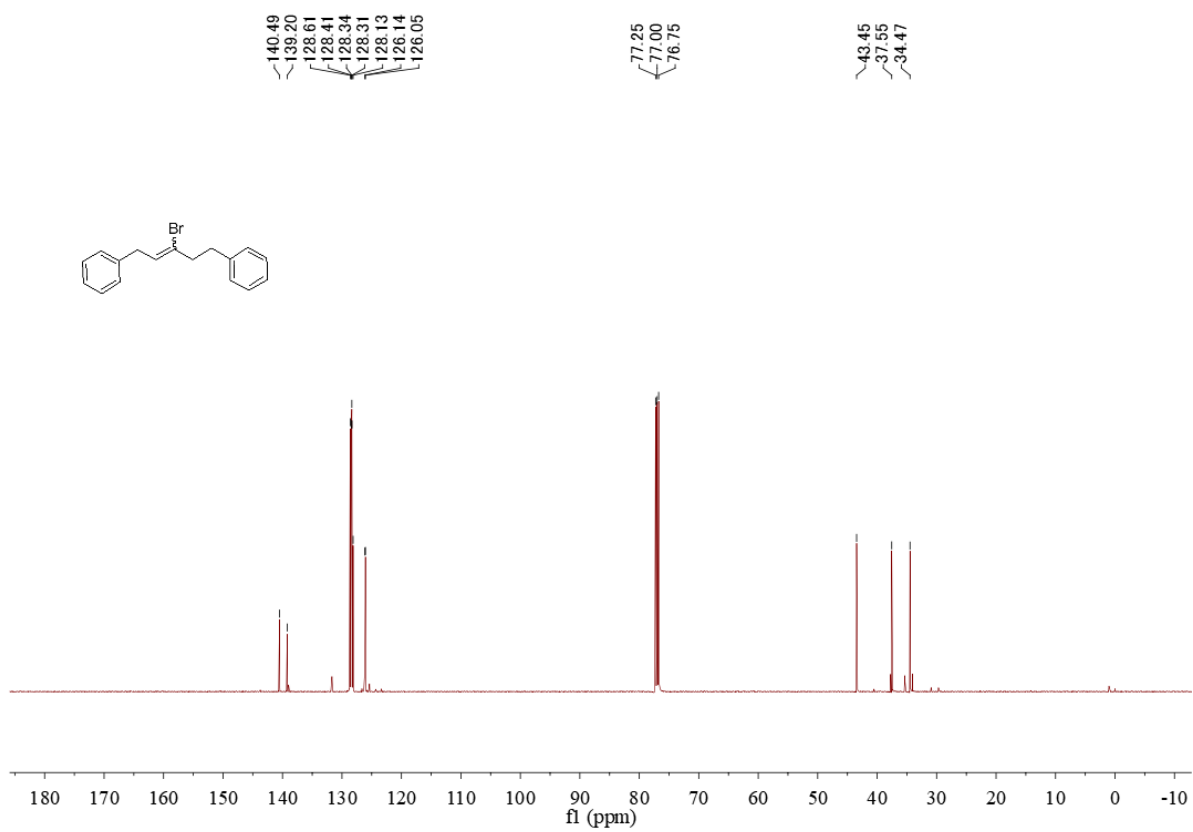

**Figure S251.** <sup>1</sup>H-NMR spectrum of crude reaction mixture of (3,3-dichloropentane-1,5-diyl)dibenzene (**1x**) and (CF<sub>3</sub>)<sub>2</sub>CHOH, related to **Table 2**.

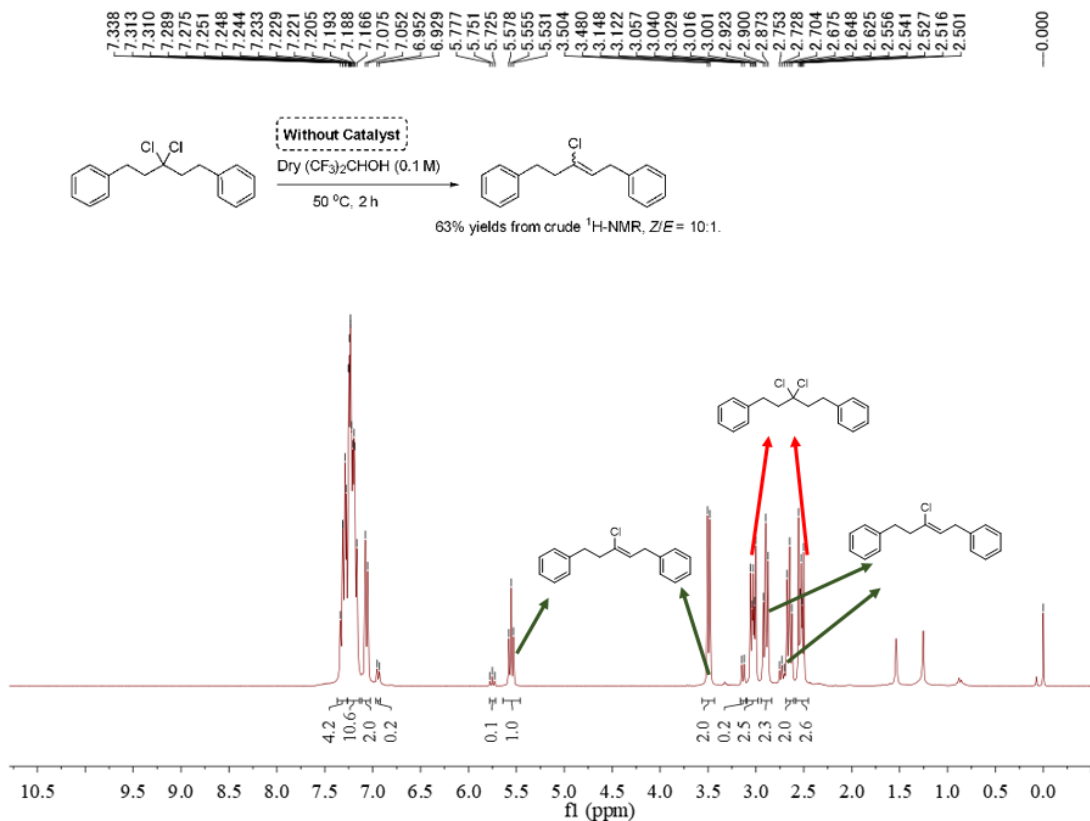

**Figure S252.**  $^1\text{H-NMR}$  spectrum of crude reaction mixture of (3,3-dibromopentane-1,5-diyl)dibenzene (**1y**) and  $(\text{CF}_3)_2\text{CHOH}$ , related to **Table 2**.

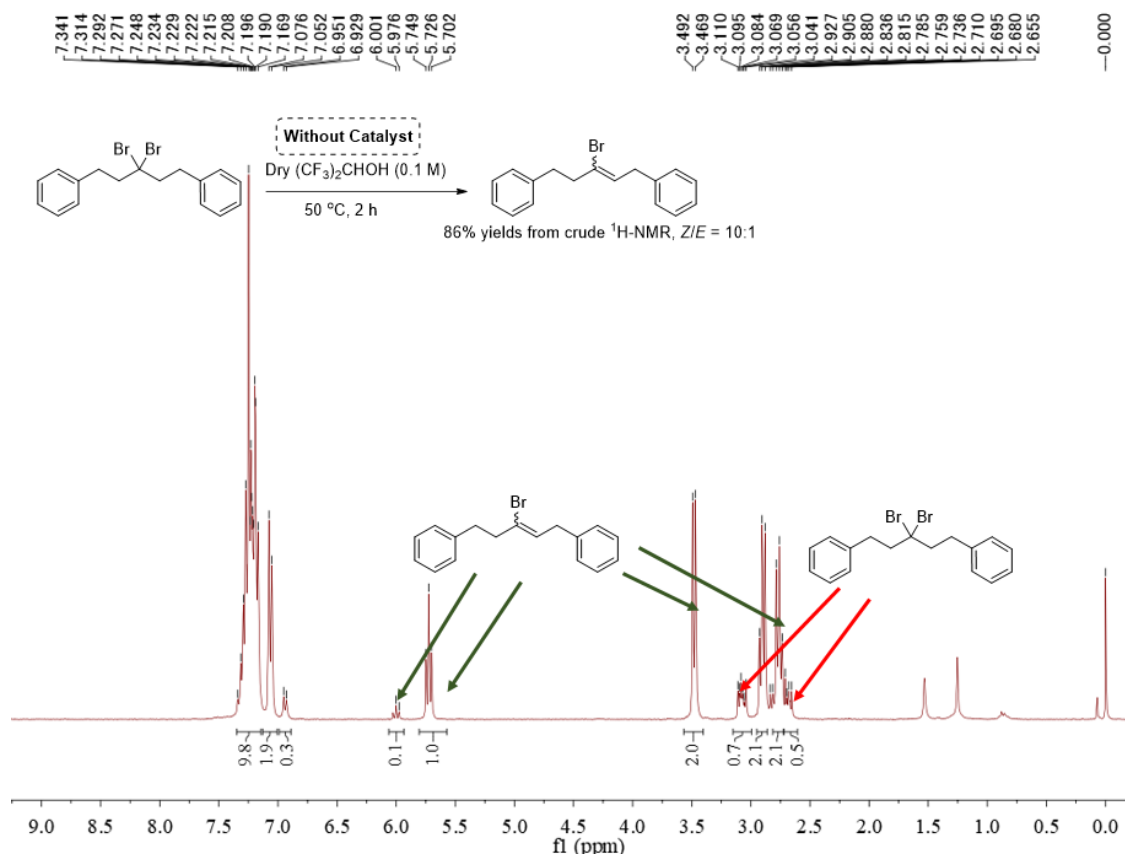

**Figure S253**  $^1\text{H-NMR}$  spectra copy of crude reaction mixture of (3,3-dibromopentane-1,5-diyl)dibenzene(**1y**)/ $\text{B}(\text{C}_6\text{F}_5)_3/p\text{-C}_6\text{H}_4\text{F}_2$ , related to **Table 2**.

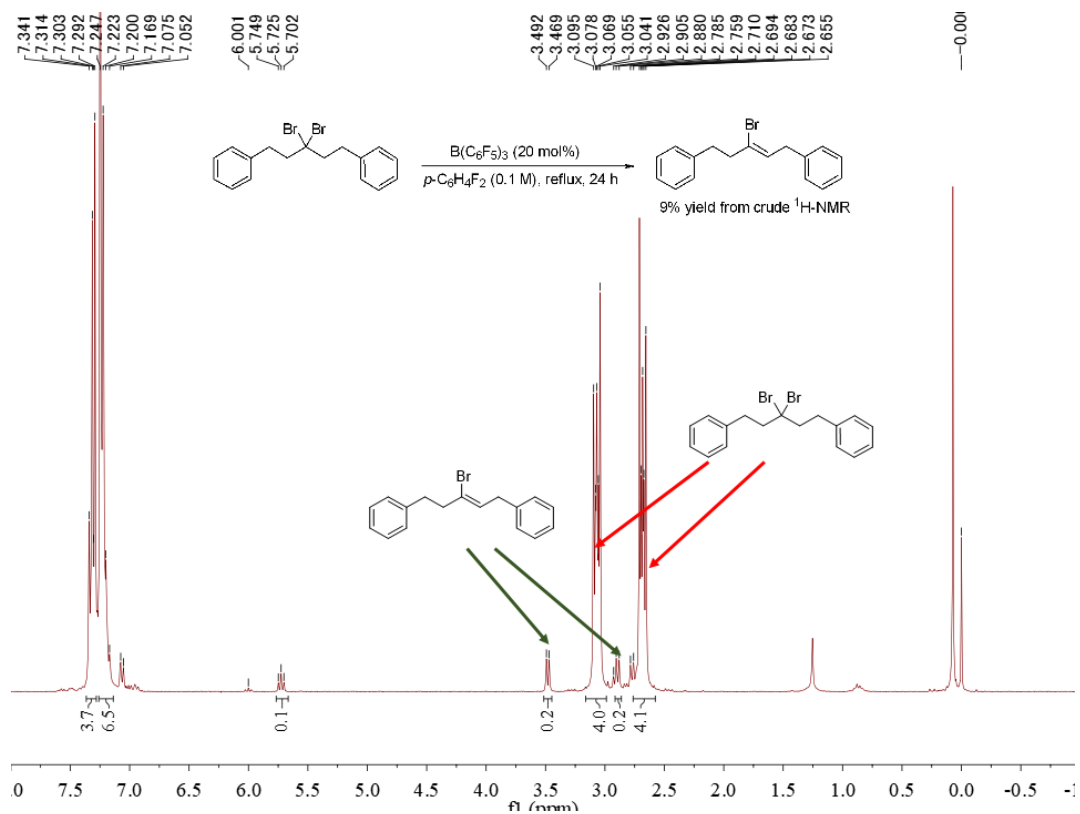

## Supplemental Table

**Table S1.** Optimization of  $B(C_6F_5)_3$  induced defluorinative Friedel-Crafts cyclization, related to **Table 1**.

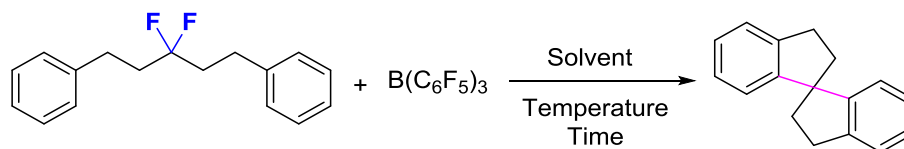

| Entry | $B(C_6F_5)_3$<br>(equiv) | Solvent                              | Concentration | Temperature<br>(°C) | Time<br>(h) | Yields<br>(%)   |
|-------|--------------------------|--------------------------------------|---------------|---------------------|-------------|-----------------|
| 1     | 2.2                      | $CH_2Cl_2$                           | 0.1 M         | RT                  | 30          | 85              |
| 2     | 1.1                      | $CH_2Cl_2$                           | 0.1 M         | RT                  | 30          | 31              |
| 3     | 0.2                      | $CH_2Cl_2$                           | 0.1 M         | RT                  | 30          | Trace           |
| 4     | 0.2                      | $CH_2Cl_2$                           | 0.2 M         | 100 <sup>a</sup>    | 2           | Trace           |
| 5     | 0.2                      | $CH_2Cl_2$                           | 2.0 M         | 100 <sup>a</sup>    | 2           | Trace           |
| 6     | 0.5                      | $MeNO_2$                             | 2.0 M         | RT                  | 30          | Trace           |
| 7     | 0.2                      | $(CF_3)_2CHOH$                       | 2.0 M         | 100 <sup>a</sup>    | 2           | 54              |
| 8     | 0.2                      | $(CF_3)_2CHOH$                       | 0.25 M        | 100 <sup>a</sup>    | 2           | 53              |
| 9     | 0.1                      | $(CF_3)_2CHOH$                       | 0.25 M        | 100 <sup>a</sup>    | 2           | 41              |
| 10    | 0.05                     | $(CF_3)_2CHOH$                       | 0.25 M        | 100 <sup>a</sup>    | 2           | 25              |
| 11    | ---                      | $(CF_3)_2CHOH$                       | 0.25 M        | 100 <sup>a</sup>    | 2           | NR              |
| 12    | 0.2                      | $(CF_3)_2CHOH/DCM$<br>(1:9)          | 0.25 M        | 100 <sup>a</sup>    | 2           | Trace           |
| 13    | 0.2                      | $(CF_3)_2CHOH$                       | 0.125 M       | 100 <sup>a</sup>    | 2           | 71              |
| 14    | 0.2                      | $(CF_3)_2CHOH$<br>$H_2O$ (2.2 equiv) | 0.125 M       | 100 <sup>a</sup>    | 2           | 0 <sup>b</sup>  |
| 15    | 0.2                      | $(CF_3)_2CHOH$                       | 0.125 M       | 50                  | 2           | 75              |
| 16    | 0.2                      | $(CF_3)_2CHOH$                       | 0.1 M         | 50                  | 2           | 77              |
| 17    | 0.2                      | $(CF_3)_2CHOH$                       | 0.1 M         | RT                  | 17          | 28              |
| 18    | 0.1                      | $(CF_3)_2CHOH$                       | 0.1 M         | 50                  | 20          | 16              |
| 19    | 0.2                      | $(CF_3)_2CHOH$                       | 0.05 M        | 50                  | 2           | 84              |
| 20    | 0.2                      | $(CF_3)_2CHOH$                       | 0.05 M        | 50 <sup>c</sup>     | 2           | 83              |
| 21    | 0.2                      | $(CF_3)_2CHOH^d$                     | 0.05 M        | 50                  | 2           | 27 <sup>e</sup> |
| 22    | 0.2                      | $(CF_3)_2CHOH$<br>$H_2O$ (2.2 equiv) | 0.05 M        | 50                  | 12          | 0 <sup>b</sup>  |
| 23    | ---                      | $(CF_3)_2CHOH$                       | 0.05 M        | 50                  | 2           | NR              |
| 24    | 0.2                      | Solkane-365                          | 0.05 M        | 50                  | 2           | NR              |
| 25    | 0.2                      | iPrOH                                | 0.05 M        | 50                  | 2           | NR              |
| 26    | 0.2                      | 1,4-dioxane                          | 0.05 M        | 50                  | 2           | NR              |
| 27    | 0.2                      | $CF_3CH_2OH$                         | 0.05 M        | 50                  | 2           | NR              |
| 28    | 0.2                      | $(CF_3)_2PhOH$                       | 0.05 M        | 100                 | 2           | NR              |

<sup>a</sup>Sealed tube. <sup>b</sup> The hydrolysis product 1,5-diphenylpentan-3-one was obtained in quantitative yield. <sup>c</sup>The reaction was conducted under microwave conditions. <sup>d</sup>(CF<sub>3</sub>)<sub>2</sub>CHOH was used as purchased, without any precaution to exclude moisture. <sup>e</sup>1,5-diphenylpentan-3-one was observed as major product.

**Table S2.** Optimization of conditions for the synthesis of monofluoroalkenes, related to **Table 1**.

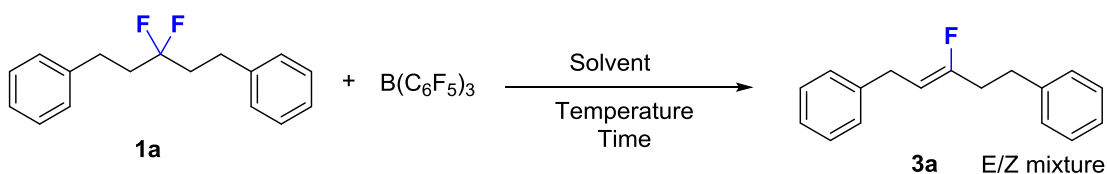

| Entry | B(C <sub>6</sub> F <sub>5</sub> ) <sub>3</sub><br>(equiv) | Solvent                                                 | Concentration | Temperature<br>(°C) | Time<br>(h) | Yield <sup>a</sup><br>(%) | Z/E <sup>a</sup> |
|-------|-----------------------------------------------------------|---------------------------------------------------------|---------------|---------------------|-------------|---------------------------|------------------|
| 1     | 0.2                                                       | <i>o</i> -C <sub>6</sub> H <sub>4</sub> Cl <sub>2</sub> | 0.1 M         | 100                 | 3           | 45                        | 5.9:1            |
| 2     | 0.2                                                       | <i>o</i> -C <sub>6</sub> H <sub>4</sub> Cl <sub>2</sub> | 0.1 M         | 160                 | 3           | 70                        | 6.9:1            |
| 3     | 0.1                                                       | <i>o</i> -C <sub>6</sub> H <sub>4</sub> Cl <sub>2</sub> | 0.1 M         | 160                 | 3           | 30                        | 6.3:1            |
| 4     | 0.2                                                       | <i>o</i> -C <sub>6</sub> H <sub>4</sub> Cl <sub>2</sub> | 0.1 M         | 160                 | 6           | 64                        | 6.2:1            |
| 5     | ---                                                       | <i>o</i> -C <sub>6</sub> H <sub>4</sub> Cl <sub>2</sub> | 0.1 M         | 160                 | 3           | NR                        | ---              |
| 6     | 0.2                                                       | <i>o</i> -C <sub>6</sub> H <sub>4</sub> Cl <sub>2</sub> | 0.25 M        | 180 <sup>b</sup>    | 3           | 67                        | 5.9:1            |
| 7     | 0.2                                                       | <i>o</i> -C <sub>6</sub> H <sub>4</sub> Cl <sub>2</sub> | 0.25 M        | 160                 | 3           | 52                        | 6.3:1            |
| 8     | 0.1                                                       | <i>o</i> -C <sub>6</sub> H <sub>4</sub> Cl <sub>2</sub> | 0.25 M        | 160                 | 3           | 43                        | 7.5:1            |
| 9     | 0.2                                                       | <i>o</i> -C <sub>6</sub> H <sub>4</sub> Cl <sub>2</sub> | 0.05 M        | 160                 | 3           | 71                        | 5.6:1            |
| 10    | 0.2                                                       | <i>o</i> -C <sub>6</sub> H <sub>4</sub> Cl <sub>2</sub> | 0.1 M         | 220 <sup>c</sup>    | 3           | 81                        | 7.3:1            |
| 11    | 0.2                                                       | <i>m</i> -C <sub>6</sub> H <sub>4</sub> Cl <sub>2</sub> | 0.1 M         | 160                 | 3           | 13                        | ---              |
| 12    | 0.2                                                       | Nitrobenzene                                            | 0.1 M         | 160                 | 3           | 23                        | 6.5:1            |
| 14    | 0.2                                                       | DMF                                                     | 0.1 M         | reflux              | 3           | NR                        | ---              |
| 15    | 0.2                                                       | DMSO                                                    | 0.1 M         | 160                 | 3           | NR                        | ---              |
| 16    | 0.2                                                       | <i>o</i> -C <sub>6</sub> H <sub>4</sub> F <sub>2</sub>  | 0.1 M         | reflux              | 3           | 75                        | 6.9:1            |
| 17    | 0.2                                                       | <i>o</i> -C <sub>6</sub> H <sub>4</sub> F <sub>2</sub>  | 0.1 M         | reflux              | 24          | 87                        | 7.1:1            |

<sup>a</sup>Determined by <sup>19</sup>F NMR analysis using PhCF<sub>3</sub> as the internal standard. <sup>b</sup>The reaction was conducted under microwave conditions. <sup>c</sup> Sealed tube.

## Transparent Methods

### General information

All reactions were performed in oven-dried and flame-dried glassware (10 mL) under a positive pressure of argon atmosphere unless mentioned otherwise. Solvents were transferred *via* syringe and were introduced into the reaction vessels through a rubber septum. All of the reactions were monitored by thin-layer chromatography (TLC) carried out on 0.25 mm Merck silica gel (60-F254). The TLC plates were visualized with UV light and 7% phosphomolybdic acid or  $\text{KMnO}_4$  in ethanol/heat. Column chromatography was carried out on a column packed with silica gel (60N spherical neutral size 63-210  $\mu\text{m}$ ). The  $^1\text{H-NMR}$  (300 MHz),  $^{19}\text{F-NMR}$  (282 MHz),  $^{13}\text{C-NMR}$  (125 MHz or 75 MHz) spectra for solution in  $\text{CDCl}_3$  were recorded on a Bruker Avance 500, a Varian Mercury 300 spectrometers. Chemical shifts ( $\delta$ ) are expressed in ppm downfield from internal TMS ( $\delta = 0.00$ ) for  $^1\text{H-NMR}$ .  $\text{C}_6\text{F}_6$  [ $\delta = -162.2$  ( $\text{CDCl}_3$ )] was used as an internal standard for  $^{19}\text{F-NMR}$ . Mass spectra were recorded on a SHIMADZU LCMS-2010EV (ESI-MS and APCI-MS) and SHIMADZU GCMS-QP5050A (EI-MS) using GC capillary column HYDRODEX- $\beta$ -TBDAC (length: 25 m, i.d.: 0.25 mm). Helium was used as a carrier gas. Initial temperature: 50  $^\circ\text{C}$ , increase temperature at a rate: 40  $^\circ\text{C}/\text{min}$  until final temperature (230  $^\circ\text{C}$ ), hold temperature for 15 min at 230  $^\circ\text{C}$ . Solvent delay: 3.0 minutes. High resolution mass spectrometry (HRMS) was recorded on a Waters, GCT Premier (EI-MS) with a TOF analyzer. Infrared spectra were recorded on a JASCO FT/IR-4100 spectrometer. Melting points were recorded on a BUCHI M-565.

Super dehydrated solvents such as  $\text{CH}_2\text{Cl}_2$ , 1,4-dioxane and 1,2-dichlorobenzene (water max 0.001%) were purchased from Wako Pure Chemical Industries, Ltd. and used under argon atmosphere. 1,4-difluorobenzene and 1,1,1,3,3,3-hexafluoropropan-2-ol was purchased from Tokyo Chemical Industry Co., Ltd., and were dried and distilled from 4 $\text{\AA}$  molecule sieves under argon atmosphere, and were stored in glove box. Tis(pentafluorophenyl)borane was purchased from Tokyo Chemical Industry Co., Ltd. (>98.0%, stored under Ar), and was used and stored in glove box with argon atmosphere.

## Experimental Procedures

### The preparation of spirobiindanes **2a-2t**, related to Figure 2.

General procedure for the intramolecular Friedel-Craft reaction of *gem*-difluoroalkanes: In a flame-dried test tube (10 mL), *gem*-difluoroalkanes **1** (0.1 mmol) were added to a solution of B(C<sub>6</sub>F<sub>5</sub>)<sub>3</sub> (20 mol%) in dry HFIP (2.0 mL) at room temperature in a glovebox filled with argon. Subsequently, the tube was sealed with a rubber septum, removed from the glovebox and stirred at 50 °C for 2-4 h under a positive pressure of argon with a balloon. The resulting mixture was allowed to cool to room temperature and washed with water, extracted with CH<sub>2</sub>Cl<sub>2</sub>, dried over Na<sub>2</sub>SO<sub>4</sub>, filtered, and then concentrated *in vacuo*. The residue was purified by column chromatography on silica gel using *n*-hexane as the eluent to afford the desired spirobiindanes **2a-2t** in good yields.

#### 2,2',3,3'-Tetrahydro-1,1'-spirobi[indene] **2a**

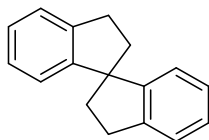

(3,3-Difluoropentane-1,5-diyl)dibenzene **1a** (26.0 mg, 0.1 mmol) was added to a solution of tris(pentafluorophenyl)borane (10.1 mg, 20 mol%) in dry (CF<sub>3</sub>)<sub>2</sub>CHOH (2.0 ml). And the resulting mixture was stirred at 50 °C for 2 h under argon atmosphere. The purification by column chromatography on silica gel (*n*-hexane) to give **2a** (18.8 mg, 84%) as a colorless oil. <sup>1</sup>H NMR (CDCl<sub>3</sub>, 300 MHz) δ 7.34–7.24 (m, 2H), 7.24–7.08 (m, 4H), 6.99–6.86 (m, 2H), 3.10–2.94 (m, 4H), 2.34–2.23 (m, 2H), 2.25–2.10 (m, 2H). <sup>13</sup>C NMR (126 MHz, CDCl<sub>3</sub>) δ 150.4, 143.7, 126.65, 126.63, 124.3, 123.4, 60.7, 40.5, 30.8. MS (EI, *m/z*) 220 [M]<sup>+</sup>

#### 6,6'-Dimethyl-2,2',3,3'-tetrahydro-1,1'-spirobi[indene] **2b**

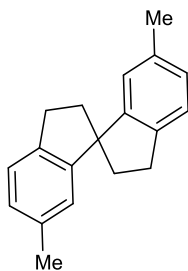

4,4'-(3,3-Difluoropentane-1,5-diyl)bis(methylbenzene) **1b** (28.9 mg, 0.1 mmol) was added to a solution of tris(pentafluorophenyl)borane (10.1 mg, 20 mol%) in dry (CF<sub>3</sub>)<sub>2</sub>CHOH (2.0 ml). And the resulting mixture was stirred at 50 °C for 2 h under argon atmosphere. The purification by column chromatography on silica gel (*n*-hexane) to give **2a** (17.3 mg, 69%) as a white solid, mp = 84–86 °C. <sup>1</sup>H NMR (300 MHz, CDCl<sub>3</sub>) δ 7.19 (d, *J* = 7.6 Hz, 2H), 7.08–6.98 (m, 2H), 6.78 (s, 2H), 2.99 (dd, *J* = 8.0, 6.0 Hz, 4H), 2.39–2.16 (m, 8H), 2.23–2.08 (m, 2H). <sup>13</sup>C NMR (126 MHz, CDCl<sub>3</sub>) δ 150.6, 140.7, 136.2, 127.5, 124.1, 124.0, 60.6, 40.8, 30.5, 21.3. IR (KBr): 2929, 2852, 1490, 1459, 1380, 809 cm<sup>-1</sup>. HRMS (EI) calcd. for C<sub>19</sub>H<sub>20</sub><sup>+</sup> [M]<sup>+</sup>: 248.1565 found



248.1573.

6,6'-Dimethoxy-2,2',3,3'-tetrahydro-1,1'-spirobi[indene] **2c**

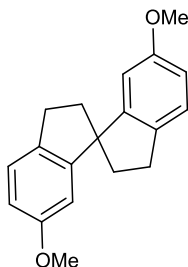

4,4'-(3,3-Difluoropentane-1,5-diyl)bis(methoxybenzene) **1c** (32.0 mg, 0.1 mmol) was added to a solution of tris(pentafluorophenyl)borane (10.1 mg, 20 mol%) in dry (CF<sub>3</sub>)<sub>2</sub>CHOH (2.0 ml). And the resulting mixture was stirred at 50 °C for 2 h under argon atmosphere. The purification by column chromatography on silica gel (*n*-hexane) to give **2c** (9.7 mg, 27%) as a white solid, mp = 129–131 °C. <sup>1</sup>H NMR (300 MHz, CDCl<sub>3</sub>) δ 7.17 (d, *J* = 8.2 Hz, 2H), 6.75 (dd, *J* = 8.2, 2.5 Hz, 2H), 6.49 (d, *J* = 2.4 Hz, 2H), 3.72 (s, 6H), 2.98–2.83 (m, 4H), 2.34–2.21 (m, 2H), 2.24–1.95 (m, 2H). <sup>13</sup>C NMR (126 MHz, CDCl<sub>3</sub>) δ 159.0, 151.7, 135.7, 124.8, 112.8, 108.7, 61.2, 55.4, 40.9, 30.1. IR (KBr): 2937, 2832, 1614, 1479, 1364, 1284, 821 cm<sup>-1</sup>. MS (EI, *m/z*) 280 [M<sup>+</sup>]. HRMS (EI) calcd. for C<sub>19</sub>H<sub>20</sub>O<sub>2</sub><sup>+</sup> [M<sup>+</sup>]: 280.1463 found 280.1466.

6,6'-Diethyl-2,2',3,3'-tetrahydro-1,1'-spirobi[indene] **2d**

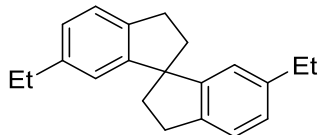

4,4'-(3,3-Difluoropentane-1,5-diyl)bis(ethylbenzene) **1d** (31.5 mg, 0.1 mmol) was added to a solution of tris(pentafluorophenyl)borane (10.1 mg, 20 mol%) in dry (CF<sub>3</sub>)<sub>2</sub>CHOH (2.0 ml). And the resulting mixture was stirred at 50 °C for 2 h under argon atmosphere. The purification by column chromatography on silica gel (*n*-hexane) to give **2d** (17.6 mg, 62%) as a colorless oil. <sup>1</sup>H NMR (300 MHz, CDCl<sub>3</sub>) δ 7.23–7.16 (m, 2H), 7.04 (d, *J* = 7.6 Hz, 2H), 6.79 (s, 2H), 2.98–2.86 (m, 4H), 2.57 (q, *J* = 7.5 Hz, 4H), 2.31–2.03 (m, 4H), 1.17 (t, *J* = 7.6 Hz, 6H). <sup>13</sup>C NMR (126 MHz, CDCl<sub>3</sub>) δ 150.6, 142.8, 141.1, 126.2, 124.0, 122.9, 60.6, 40.7, 30.4, 28.8, 15.9. IR (KBr): 2960, 2933, 2852, 1482, 1463, 1373, 885, 813 cm<sup>-1</sup>. MS (EI, *m/z*) 276 [M<sup>+</sup>]. HRMS (EI) calcd. for C<sub>21</sub>H<sub>24</sub><sup>+</sup> [M<sup>+</sup>]: 276.1878 found 276.1884.

6,6'-Dibutyl-2,2',3,3'-tetrahydro-1,1'-spirobi[indene] **2e**

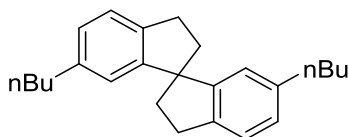

4,4'-(3,3-Difluoropentane-1,5-diyl)bis(butylbenzene) **1e** (37.2 mg, 0.1 mmol) was added to a solution of

tris(pentafluorophenyl)borane (10.1 mg, 20 mol%) in dry (CF<sub>3</sub>)<sub>2</sub>CHOH (2.0 ml). And the resulting mixture was stirred at 50 °C for 2 h under argon atmosphere. The purification by column chromatography on silica gel (*n*-hexane) to give **2e** (19.7 mg, 59%) as a colorless oil. <sup>1</sup>H NMR (300 MHz, CDCl<sub>3</sub>) δ 7.19 (d, *J* = 7.6 Hz, 2H), 7.05–6.96 (m, 2H), 6.77 (s, 2H), 2.99–2.86 (m, 4H), 2.54–2.46 (m, 4H), 2.37–2.24 (m, 2H), 2.21–2.12 (m, 2H), 1.53–1.44 (m, 4H), 1.30 (dq, *J* = 14.5, 7.2 Hz, 4H), 0.88 (t, *J* = 7.3 Hz, 6H). <sup>13</sup>C NMR (126 MHz, CDCl<sub>3</sub>) δ 150.6, 141.5, 141.1, 126.8, 123.9, 123.5, 60.6, 40.8, 35.6, 34.0, 30.5, 22.5, 13.9. IR (KBr): 2948, 2925, 2860, 1606, 1488, 1454, 1378, 829, 732 cm<sup>-1</sup>. MS (EI, *m/z*) 332 [M<sup>+</sup>]. HRMS (EI) calcd. for C<sub>25</sub>H<sub>32</sub><sup>+</sup> [M<sup>+</sup>]: 332.2504 found 332.2519

#### 4,4'-Dimethyl-2,2',3,3'-tetrahydro-1,1'-spirobi[indene] **2f**

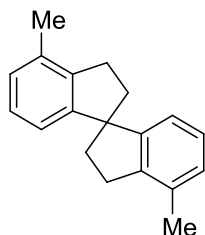

2,2'-(3,3-Difluoropentane-1,5-diyl)bis(methylbenzene) **1f** (28.8 mg, 0.1 mmol) was added to a solution of tris(pentafluorophenyl)borane (10.1 mg, 20 mol%) in dry (CF<sub>3</sub>)<sub>2</sub>CHOH (2.0 ml). And the resulting mixture was stirred at 50 °C for 2 h under argon atmosphere. The purification by column chromatography on silica gel (*n*-hexane) to give **2f** (22.8 mg, 90%) as a white solid, mp = 89–90 °C. <sup>1</sup>H NMR (300 MHz, CDCl<sub>3</sub>) δ 7.11–6.99 (m, 4H), 6.76 (d, *J* = 7.2 Hz, 2H), 2.95–2.89 (m, 4H), 2.34–2.25 (m, 8H), 2.22–2.04 (m, 2H). <sup>13</sup>C NMR (126 MHz, CDCl<sub>3</sub>) δ 150.3, 142.5, 133.5, 127.4, 126.8, 120.7, 61.1, 40.3, 29.3, 19.1. IR (KBr): 2937, 2848, 1590, 1494, 1376, 782, 765 cm<sup>-1</sup>. HRMS (EI) calcd. for C<sub>19</sub>H<sub>20</sub><sup>+</sup> [M<sup>+</sup>]: 248.1565 found 248.1567.

#### 4,4'-Dimethoxy-2,2',3,3'-tetrahydro-1,1'-spirobi[indene] **2g**

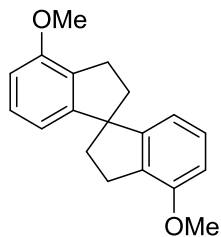

2,2'-(3,3-Difluoropentane-1,5-diyl)bis(methoxybenzene) **1g** (32.0 mg, 0.1 mmol) was added to a solution of tris(pentafluorophenyl)borane (10.1 mg, 20 mol%) in dry (CF<sub>3</sub>)<sub>2</sub>CHOH (2.0 ml). And the resulting mixture was stirred at 50 °C for 2 h under argon atmosphere. The purification by column chromatography on silica gel (*n*-hexane) to give **2g** (10.5 mg, 37%) as a white solid, mp = 107–109 °C. <sup>1</sup>H NMR (300 MHz, CDCl<sub>3</sub>) δ 7.13 (t, *J* = 7.8 Hz, 2H), 6.71 (d, *J* = 8.1 Hz, 2H), 6.57 (d, *J* = 7.5 Hz, 2H), 3.87 (s, 6H), 2.99–2.81 (m, 4H), 2.30–2.21 (m, 4H). <sup>13</sup>C NMR (126 MHz, CDCl<sub>3</sub>) δ 155.7, 152.3, 131.1, 128.2, 115.8, 108.1, 61.7, 55.2, 40.4, 27.4. IR (KBr): 2952, 2840, 1687, 1463, 1315, 1255, 775 cm<sup>-1</sup>. HRMS (EI) calcd. for C<sub>19</sub>H<sub>20</sub>O<sub>2</sub><sup>+</sup> [M<sup>+</sup>]: 280.1463 found 280.1460.

5,5'-Dimethyl-2,2',3,3'-tetrahydro-1,1'-spirobi[indene] **2h**

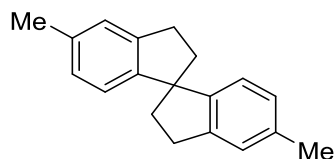

3,3'-(3,3-Difluoropentane-1,5-diyl)bis(methylbenzene) **1h** (28.8mg, 0.1 mmol) was added to a solution of tris(pentafluorophenyl)borane (10.1 mg, 20 mol%) in dry (CF<sub>3</sub>)<sub>2</sub>CHOH (2.0 ml). And the resulting mixture was stirred at 50 °C for 2 h under argon atmosphere. The purification by column chromatography on silica gel (*n*-hexane) to give **2h** (19.6 mg, 78%) as a colorless oil. The isolated **2h** was obtained with impure isomers (ratio about 9:1, based on integrals of methyl peak in <sup>1</sup>H-NMR, and GC-MS analysis). <sup>1</sup>H NMR (300 MHz, CDCl<sub>3</sub>) δ 7.10 (s, 2H), 6.96 (d, *J* = 7.7 Hz, 2H), 6.82 (d, *J* = 7.7 Hz, 2H), 2.99–2.87 (m, 4H), 2.33–2.23 (m, 8H), 2.22–2.16 (m, 2H). <sup>13</sup>C NMR (126 MHz, CDCl<sub>3</sub>) δ 147.6, 143.9, 136.2, 127.4, 125.0, 123.0, 59.9, 40.7, 30.7, 21.2. IR (KBr): 3004, 2940, 2948, 1610, 1490, 1448, 1376, 809, 771 cm<sup>-1</sup>. MS (EI, *m/z*) 248 [M<sup>+</sup>]. HRMS (EI) calcd. for C<sub>19</sub>H<sub>20</sub><sup>+</sup> [M<sup>+</sup>]:248.1565 found 248. 1577.

4,4'-Difluoro-2,2',3,3'-tetrahydro-1,1'-spirobi[indene] **2i**

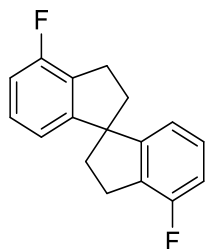

2,2'-(3,3-Difluoropentane-1,5-diyl)bis(fluorobenzene) **1i** (29.6 mg, 0.1 mmol) was added to a solution of tris(pentafluorophenyl)borane (10.1 mg, 20 mol%) in dry (CF<sub>3</sub>)<sub>2</sub>CHOH (2.0 ml). And the resulting mixture was stirred at 50 °C for 2 h under argon atmosphere. The purification by column chromatography on silica gel (*n*-hexane) to give **2i** (14.9 mg, 57%) as a white solid, mp = 96–97 °C. <sup>1</sup>H NMR (300 MHz, CDCl<sub>3</sub>) δ 7.15–7.08 (m, 2H), 6.96–6.86 (m, 2H), 6.70 (d, *J* = 7.5 Hz, 2H), 3.13–2.97 (m, 4H), 2.35 (ddd, *J* = 11.6, 7.5, 2.0 Hz, 2H), 2.26–2.16 (m, 2H). <sup>13</sup>C NMR (126 MHz, CDCl<sub>3</sub>) δ 159.19 (d, *J* = 246.6 Hz), 153.50 (d, *J* = 5.6 Hz), 129.55 (d, *J* = 18.3 Hz), 128.75 (d, *J* = 6.9 Hz), 118.96 (d, *J* = 3.3 Hz), 113.43 (d, *J* = 20.6 Hz), 61.6, 40.5, 26.70. IR (KBr): 2944, 1614, 1585, 1455, 1241 cm<sup>-1</sup>. HRMS (EI) calcd. for C<sub>17</sub>H<sub>14</sub>F<sub>2</sub><sup>+</sup> [M<sup>+</sup>]: 256.1064 found 256.1057.

4,4'-Dibromo-2,2',3,3'-tetrahydro-1,1'-spirobi[indene] **2j**

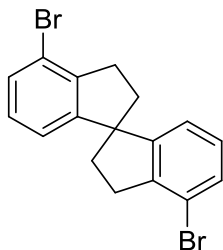

2,2'-(3,3-Difluoropentane-1,5-diyl)bis(bromobenzene) **1j** (41.8 mg, 0.1 mmol) was added to a solution of tris(pentafluorophenyl)borane (10.1 mg, 20 mol%) in dry (CF<sub>3</sub>)<sub>2</sub>CHOH (2.0 ml). And the resulting mixture was stirred at 50 °C for 2 h under argon atmosphere. The purification by column chromatography on silica gel (*n*-hexane) to give **2j** (30.1 mg, 79%) as a white solid 100-102 °C. <sup>1</sup>H NMR (300 MHz, CDCl<sub>3</sub>) δ 7.37–7.31 (m, 2H), 7.03 (t, *J* = 7.7 Hz, 2H), 6.85 (d, *J* = 7.5 Hz, 2H), 3.07–2.99 (m, 4H), 2.33–2.25 (m, 2H), 2.24–2.14 (m, 2H). <sup>13</sup>C NMR (126 MHz, CDCl<sub>3</sub>) δ 151.9, 143.9, 130.1, 128.7, 122.2, 119.9, 63.2, 39.8, 32.3. IR (KBr): 2940, 1565, 1442, 1307, 775, 678 cm<sup>-1</sup>. MS (EI, *m/z*) 375 [M<sup>+</sup>]. HRMS (EI) calcd. for C<sub>17</sub>H<sub>14</sub>Br<sub>2</sub><sup>+</sup> [M<sup>+</sup>]: 375.9462 found 375.9452

4,4'-Dichloro-2,2',3,3'-tetrahydro-1,1'-spirobi[indene] **2k**

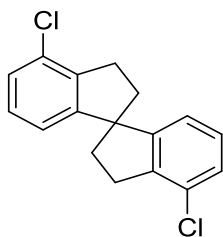

2,2'-(3,3-Difluoropentane-1,5-diyl)bis(chlorobenzene) **1k** (32.9 mg, 0.1 mmol) was added to a solution of tris(pentafluorophenyl)borane (10.1 mg, 20 mol%) in dry (CF<sub>3</sub>)<sub>2</sub>CHOH (2.0 ml). And the resulting mixture was stirred at 50 °C for 2 h under argon atmosphere. The purification by column chromatography on silica gel (*n*-hexane) to give **2k** (23.3 mg, 77%) as a white solid, mp = 116-118 °C. <sup>1</sup>H NMR (300 MHz, CDCl<sub>3</sub>) δ 7.19 (d, *J* = 7.9 Hz, 2H), 7.09 (t, *J* = 7.6 Hz, 2H), 6.80 (d, *J* = 7.4 Hz, 2H), 3.15–2.96 (m, 4H), 2.34 (ddd, *J* = 11.7, 7.3, 4.2 Hz, 2H), 2.26–2.17 (m, 2H). <sup>13</sup>C NMR (126 MHz, CDCl<sub>3</sub>) δ 151.9, 141.7, 130.6, 128.4, 126.9, 121.6, 62.6, 39.9, 30.1. IR (KBr): 2937, 2844, 1590, 1459, 1415, 1099, 817, 725 cm<sup>-1</sup>. HRMS (EI) calcd. for C<sub>17</sub>H<sub>14</sub>Cl<sub>2</sub><sup>+</sup> [M<sup>+</sup>]: 288.0473 found 288.0481.

6,6'-Dibromo-2,2',3,3'-tetrahydro-1,1'-spirobi[indene] **2l**

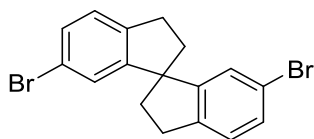

4,4'-(3,3-Difluoropentane-1,5-diyl)bis(bromobenzene) **1l** (41.9 mg, 0.1 mmol) was added to a solution of tris(pentafluorophenyl)borane (10.1 mg, 20 mol%) in dry (CF<sub>3</sub>)<sub>2</sub>CHOH (2.0 ml). And the resulting mixture

was stirred at 50 °C for 2 h under argon atmosphere. The purification by column chromatography on silica gel (*n*-hexane) to give **2l** (24.4 mg, 64%) as a white solid, mp = 142–144 °C. <sup>1</sup>H NMR (300 MHz, CDCl<sub>3</sub>) δ 7.32 (dd, *J* = 8.0, 1.8 Hz, 2H), 7.15 (d, *J* = 8.0 Hz, 2H), 7.02 (d, *J* = 1.5 Hz, 2H), 2.96 (dd, *J* = 8.2, 6.0 Hz, 4H), 2.32–2.23 (m, 2H), 2.24–2.16 (m, 2H). <sup>13</sup>C NMR (126 MHz, CDCl<sub>3</sub>) δ 152.0, 142.5, 129.9, 126.4, 126.0, 120.4, 60.8, 40.6, 30.3. IR (KBr): 2944, 2840, 1583, 1479, 1396, 1064, 809, 638 cm<sup>-1</sup>. HRMS (EI) calcd. for Chemical Formula: C<sub>17</sub>H<sub>14</sub>Br<sub>2</sub><sup>+</sup> [*M*<sup>+</sup>]: 375.9462 found 375.9454.

#### 6,6'-Dichloro-2,2',3,3'-tetrahydro-1,1'-spirobi[indene] **2m**

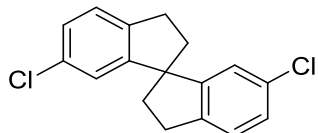

4,4'-(3,3-Difluoropentane-1,5-diyl)bis(chlorobenzene) **1m** (32.9 mg, 0.1 mmol) was added to a solution of tris(pentafluorophenyl)borane (10.1 mg, 20 mol%) in dry (CF<sub>3</sub>)<sub>2</sub>CHOH (2.0 ml). And the resulting mixture was stirred at 50 °C for 2 h under argon atmosphere. The purification by column chromatography on silica gel (*n*-hexane) to give **2m** (18.9 mg, 65%) as a white solid, mp = 116–118 °C. <sup>1</sup>H NMR (300 MHz, CDCl<sub>3</sub>) δ 7.25–7.14 (m, 4H), 6.87 (d, *J* = 1.3 Hz, 2H), 2.97 (dd, *J* = 8.4, 5.9 Hz, 4H), 2.35–2.14 (m, 4H). <sup>13</sup>C NMR (126 MHz, CDCl<sub>3</sub>) δ 151.6, 141.9, 132.4, 127.1, 125.5, 123.5, 60.8, 40.6, 30.2. IR (KBr): 2937, 2844, 1590, 1415, 1459, 1099, 877, 725 cm<sup>-1</sup>. MS (EI, *m/z*) 288 [*M*<sup>+</sup>]. HRMS (EI) calcd. for Chemical Formula: C<sub>17</sub>H<sub>14</sub>Cl<sub>2</sub><sup>+</sup> [*M*<sup>+</sup>]: 288.0473 found 288.0476.

#### 4,4',6,6'-Tetramethyl-2,2',3,3'-tetrahydro-1,1'-spirobi[indene] **2n**

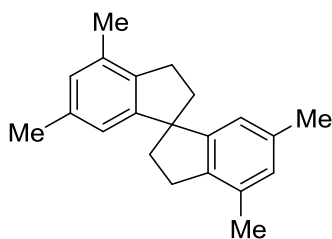

4,4'-(3,3-Difluoropentane-1,5-diyl)bis(1,3-dimethylbenzene) **1n** (31.6 mg, 0.1 mmol) was added to a solution of tris(pentafluorophenyl)borane (10.1 mg, 20 mol%) in dry (CF<sub>3</sub>)<sub>2</sub>CHOH (2.0 ml). And the resulting mixture was stirred at 50 °C for 2 h under argon atmosphere. The purification by column chromatography on silica gel (*n*-hexane) to give **2n** (26.5 mg, 95%) as a white solid, mp = 149–150 °C. <sup>1</sup>H NMR (300 MHz, CDCl<sub>3</sub>) δ 6.84 (s, 2H), 6.59 (s, 2H), 2.87 (t, *J* = 7.6 Hz, 4H), 2.28 (s, 6H), 2.25–1.94 (m, 10H). <sup>13</sup>C NMR (126 MHz, CDCl<sub>3</sub>) δ 150.6, 139.5, 136.4, 133.2, 128.4, 121.3, 60.9, 40.6, 28.9, 21.2, 19.0. IR (KBr): 2917, 2848, 1594, 1448, 1471, 1376 cm<sup>-1</sup>. MS (EI, *m/z*) 276 [*M*<sup>+</sup>]. HRMS (EI) calcd. for C<sub>21</sub>H<sub>24</sub><sup>+</sup> [*M*<sup>+</sup>]: 276.1878 found 276.1886.

4,4',5,5'-Tetramethyl-2,2',3,3'-tetrahydro-1,1'-spirobi[indene] **2o**

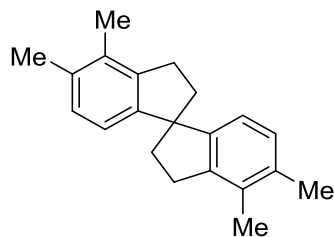

3,3'-(3,3-Difluoropentane-1,5-diyl)bis(1,2-dimethylbenzene) **1o** (31.6 mg, 0.1 mmol) was added to a solution of tris(pentafluorophenyl)borane (10.1 mg, 20 mol%) in dry (CF<sub>3</sub>)<sub>2</sub>CHOH (2.0 ml). And the resulting mixture was stirred at 50 °C for 2 h under argon atmosphere. The purification by column chromatography on silica gel (*n*-hexane) to give **2o** (23.7 mg, 85%) as a white solid, mp = 140–141 °C. <sup>1</sup>H NMR (300 MHz, CDCl<sub>3</sub>) δ 6.95 (d, *J* = 7.6 Hz, 2H), 6.69 (d, *J* = 7.6 Hz, 2H), 2.93 (dd, *J* = 11.6, 6.0 Hz, 4H), 2.25–2.24 (m, 8H), 2.22 (s, 6H), 2.19–2.10 (m, 2H). <sup>13</sup>C NMR (126 MHz, CDCl<sub>3</sub>) δ 148.1, 142.7, 134.6, 132.1, 128.4, 120.4, 61.1, 40.6, 29.7, 19.6, 15.9. IR (KBr): 2996, 2933, 2857, 1605, 1475, 1452, 1373 cm<sup>-1</sup>. HRMS (EI) calcd. for C<sub>21</sub>H<sub>24</sub><sup>+</sup> [M<sup>+</sup>]: 276.1878 found 276.1879.

2,2',3,3'-Tetrahydro-1,1'-spirobi[cyclopenta[b]naphthalene] **2p**

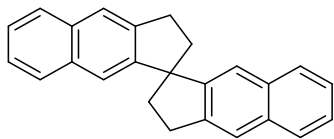

2,2'-(3,3-Difluoropentane-1,5-diyl)dinaphthalene **1p** (36.0 mg, 0.1 mmol) was added to a solution of tris(pentafluorophenyl)borane (10.1 mg, 20 mol%) in dry (CF<sub>3</sub>)<sub>2</sub>CHOH (2.0 ml). And the resulting mixture was stirred at 50 °C for 2 h under argon atmosphere. The purification by column chromatography on silica gel (*n*-hexane) to give **2p** (28.6 mg, 84%) as a white solid. M.p 49-51 °C <sup>1</sup>H NMR (300 MHz, CDCl<sub>3</sub>) δ 7.82–7.75 (m, 4H), 7.65 (d, *J* = 7.8 Hz, 2H), 7.38–7.25 (m, 6H), 3.24–3.14 (m, 4H), 2.47–2.33 (m, 4H). <sup>13</sup>C NMR (126 MHz, CDCl<sub>3</sub>) δ 149.8, 143.0, 133.2, 133.1, 127.8, 127.4, 125.1, 124.9, 122.3, 121.6, 59.9, 41.3, 30.5. IR (KBr): 2933, 2848, 1598, 1448, 1259, 750 cm<sup>-1</sup>. MS (EI, *m/z*) 320 [M<sup>+</sup>] HRMS (EI) calcd. for C<sub>25</sub>H<sub>20</sub><sup>+</sup> [M<sup>+</sup>]: 320.1565 found 320.1568.

4,6-Dimethyl-2,2',3,3'-tetrahydro-1,1'-spirobi[indene] **2q**

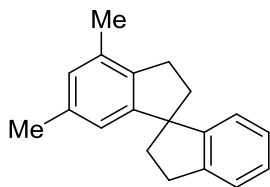

1-(3,3-Difluoro-5-phenylpentyl)-2,4-dimethylbenzene **1q** (28.8 mg, 0.1 mmol) was added to a solution of tris(pentafluorophenyl)borane (10.1 mg, 20 mol%) in dry (CF<sub>3</sub>)<sub>2</sub>CHOH (2.0 ml). And the resulting mixture

was stirred at 50 °C for 2 h under argon atmosphere. The purification by column chromatography on silica gel (*n*-hexane) to give **2q** (10.8 mg, 42%) as a colorless oil. <sup>1</sup>H NMR (300 MHz, CDCl<sub>3</sub>) δ 7.28 (d, *J* = 6.6 Hz, 1H), 7.25–7.14 (m, 2H), 6.95 (d, *J* = 6.9 Hz, 1H), 6.85 (s, 1H), 6.58 (s, 1H), 3.03–2.85 (m, 4H), 2.36–2.24 (m, 5H), 2.23 (s, 3H), 2.20–2.12 (m, 2H). <sup>13</sup>C NMR (126 MHz, CDCl<sub>3</sub>) δ 150.7, 150.4, 143.8, 139.6, 136.6, 133.3, 128.6, 126.6, 126.5, 124.3, 123.5, 121.3, 60.9, 40.7, 40.4, 30.9, 29.1, 21.2, 19.1. IR (KBr): 2937, 2852, 1610, 1479, 1463, 850, 754, 730 cm<sup>-1</sup>. MS (EI, *m/z*) 248 [M<sup>+</sup>]. HRMS (EI) calcd. for C<sub>19</sub>H<sub>20</sub><sup>+</sup> [M<sup>+</sup>]: 248.1565 found 248.1567.

#### 4-Bromo-4'-methyl-2,2',3,3'-tetrahydro-1,1'-spirobi[indene] **2r**

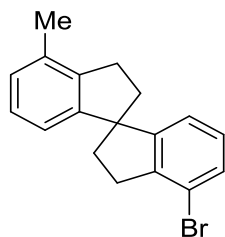

1-Bromo-2-(3,3-difluoro-5-(*o*-tolyl)pentyl)benzene **1r** (35.3 mg, 0.1 mmol) was added to a solution of tris(pentafluorophenyl)borane (10.1 mg, 20 mol%) in dry (CF<sub>3</sub>)<sub>2</sub>CHOH (2.0 ml). And the resulting mixture was stirred at 50 °C for 2 h under argon atmosphere. The purification by column chromatography on silica gel (*n*-hexane) to give **2r** (24.3 mg, 69%) as a white solid, mp = 83–85 °C. <sup>1</sup>H NMR (300 MHz, CDCl<sub>3</sub>) δ 7.34 (d, *J* = 7.8 Hz, 1H), 7.10–7.03 (m, 3H), 6.85 (d, *J* = 7.4 Hz, 1H), 6.76 (d, *J* = 7.1 Hz, 1H), 3.06–2.98 (m, 2H), 2.98–2.90 (m, 2H), 2.32–2.21 (m, 5H), 2.26–2.16 (m, 2H). <sup>13</sup>C NMR (126 MHz, CDCl<sub>3</sub>) δ 152.7, 149.6, 143.9, 142.3, 133.7, 129.6, 128.5, 127.7, 127.0, 122.3, 120.6, 119.8, 62.2, 40.3, 39.5, 32.2, 29.3, 19.1. IR (KBr): 3075, 2932, 2848, 1598, 1486, 1438, 750, 615 cm<sup>-1</sup>. HRMS (EI) calcd. for C<sub>18</sub>H<sub>17</sub>Br<sup>+</sup> [M<sup>+</sup>]: 312.0514 found 312.0517.

#### 3,3',4,4'-Tetrahydro-2H,2'H-1,1'-spirobi[naphthalene] **2s**

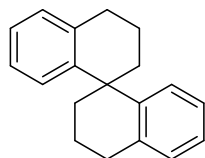

(4,4-Difluoroheptane-1,7-diyl)dibenzene **1s** (28.8 mg, 0.1 mmol) was added to a solution of tris(pentafluorophenyl)borane (10.1 mg, 20 mol%) in dry (CF<sub>3</sub>)<sub>2</sub>CHOH (2.0 ml). And the resulting mixture was stirred at 50 °C for 2 h under argon atmosphere. The purification by column chromatography on silica gel (*n*-hexane) to give **2s** (22.7 mg, 90%) as a white solid, mp = 56–58 °C. <sup>1</sup>H NMR (300 MHz, CDCl<sub>3</sub>) δ 7.12–6.99 (m, 6H), 6.77 (d, *J* = 7.5 Hz, 2H), 2.96–2.87 (m, 4H), 2.16–2.10 (m, 2H), 1.94–1.83 (m, 6H). <sup>13</sup>C NMR (126 MHz, CDCl<sub>3</sub>) δ 146.7, 137.1, 130.2, 128.5, 125.7, 125.2, 42.9, 38.8, 30.3, 19.5. IR (KBr): 2952, 2852, 1579, 1479, 1448 cm<sup>-1</sup>. HRMS (EI) calcd. for C<sub>19</sub>H<sub>20</sub><sup>+</sup> [M<sup>+</sup>]: 248.1565 found 248.1571.

### 2,3,3',4'-Tetrahydro-2'H-spiro[indene-1,1'-naphthalene] **2t**

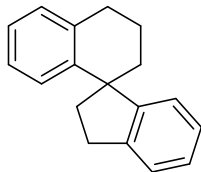

(3,3-Difluorohexane-1,6-diyl)dibenzene **1t** (27.4 mg, 0.1 mmol) was added to a solution of tris(pentafluorophenyl)borane (10.1 mg, 20 mol%) in dry (CF<sub>3</sub>)<sub>2</sub>CHOH (2.0 ml). And the resulting mixture was stirred at 50 °C for 2 h under argon atmosphere. The purification by column chromatography on silica gel (*n*-hexane) to give **2t** (21.7 mg, 88%) as a colorless oil. <sup>1</sup>H NMR (300 MHz, CDCl<sub>3</sub>) δ 7.26 (t, *J* = 6.9 Hz, 2H), 7.08–6.99 (m, 4H), 6.84 (dd, *J* = 14.5, 7.3 Hz, 2H), 2.94–2.84 (m, 4H), 2.36–2.25 (m, 2H), 1.95–1.84 (m, 4H). <sup>13</sup>C NMR (126 MHz, CDCl<sub>3</sub>) δ 152.9, 144.2, 143.6, 137.1, 129.0, 128.6, 126.6, 126.4, 125.8, 125.6, 124.2, 124.2, 52.4, 43.1, 36.2, 30.2, 30.1, 20.6. IR (KBr): 2937, 2840, 1592, 1563, 1450, 1307 cm<sup>-1</sup>. HRMS (EI) calcd. for C<sub>18</sub>H<sub>18</sub><sup>+</sup> [M<sup>+</sup>]: 234.1409 found 234.1411.

### General procedure for the preparation of monofluoroalkene **3**, related to Figure 2.

In a flame-dried test tube, *gem*-difluoroalkanes **1** (0.1 mmol) were added to a solution of B(C<sub>6</sub>F<sub>5</sub>)<sub>3</sub> (20 mol%) in dry 1,4-difluorobenzene (1.0 mL) at room temperature in a glovebox filled with argon. Subsequently, the tube was sealed with a rubber septum, removed from the glovebox and heated to reflux for 24-48 h under a positive pressure of argon with a balloon. The resulting mixture was allowed to cool to room temperature and washed with water, extracted with CH<sub>2</sub>Cl<sub>2</sub>, dried over Na<sub>2</sub>SO<sub>4</sub>, filtered, and then concentrated *in vacuo*. The residue was purified by column chromatography on silica gel using *n*-hexane as the eluent to give the desired monofluoroalkene **3**.

### (3-Fluoropent-2-ene-1,5-diyl)dibenzene **3a**

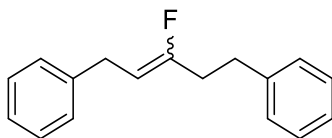

(3,3-Difluoropentane-1,5-diyl)dibenzene **1a** (26.0 mg, 0.1 mmol) was added to a solution of tris(pentafluorophenyl)borane (10.1 mg, 20 mol%) in dry 1,4-difluorobenzene (1.0 ml). And the resulting mixture was refluxed for 24 h under argon atmosphere. The purification by column chromatography on silica gel (*n*-hexane) to give **2a** (20.3 mg, 84%) as a colorless oil. The ratio for *Z/E* isomers (7.1:1) was determined by <sup>19</sup>F-NMR. (*Z*)-**3a**: <sup>1</sup>H NMR (300 MHz, CDCl<sub>3</sub>) δ 7.28–7.15 (m, 8H), 7.12 (d, *J* = 6.8 Hz, 2H), 4.68 (dt, *J* = 36.8, 7.6 Hz, 1H), 3.41 (d, *J* = 7.5 Hz, 2H), 2.87–2.81 (m, 2H), 2.53 (dt, *J* = 16.2, 6.1 Hz, 2H); <sup>13</sup>C NMR (126 MHz, CDCl<sub>3</sub>) δ 159.0 (d, *J* = 254.5 Hz), 140.7, 140.5 (d, *J* = 1.7 Hz), 128.4, 128.4, 128.3, 128.2, 126.1, 125.9, 104.6 (d, *J* = 15.2 Hz), 33.9 (d, *J* = 27.5 Hz), 32.5 (d, *J* = 1.0 Hz), 29.8 (d, *J* = 5.9 Hz); <sup>19</sup>F NMR (282 MHz, CDCl<sub>3</sub>) δ -110.7 (dt, *J* = 36.2, 17.5 Hz, 1F). IR (KBr): 3087, 3023, 2933, 2852, 1710, 1610, 1486, 1452, 1068, 943 cm<sup>-1</sup>. MS (EI, *m/z*) 240 [M]<sup>+</sup>. HRMS (EI) calcd. for C<sub>17</sub>H<sub>17</sub>F<sup>+</sup> [M<sup>+</sup>]: 240.1314,



found 240.1325.

4,4'-(3-Fluoropent-2-ene-1,5-diyl)bis(butylbenzene) **3e**

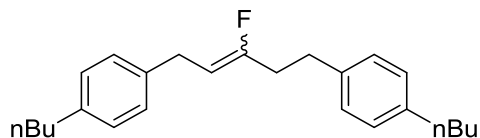

4,4'-(3,3-Difluoropentane-1,5-diyl)bis(butylbenzene) **1e** (37.2, 0.1 mmol) was added to a solution of tris(pentafluorophenyl)borane (10.1 mg, 20 mol%) in dry 1,4-difluorobenzene (1.0 ml). And the resulting mixture was refluxed for 24 h under argon atmosphere. The purification by column chromatography on silica gel (*n*-hexane) to give **3e** (24.5 mg, 69%) as a colorless oil. The ratio for *Z/E* isomers (10.0:1) was determined by <sup>19</sup>F-NMR. (*Z*)-**3e**: <sup>1</sup>H NMR (300 MHz, CDCl<sub>3</sub>) δ 7.18–6.97 (m, 8H), 4.66 (dt, *J* = 36.9, 7.5 Hz, 1H), 3.36 (d, *J* = 7.4 Hz, 2H), 2.80 (t, *J* = 7.7 Hz, 2H), 2.65–2.54 (m, 6H), 1.58–1.51 (m, 4H), 1.35 (dd, *J* = 14.6, 7.3 Hz, 4H), 0.92 (t, *J* = 7.2 Hz, 6H). <sup>13</sup>C NMR (126 MHz, CDCl<sub>3</sub>) δ 159.02 (d, *J* = 254.2 Hz), 140.6, 140.5, 137.9, 137.74 (d, *J* = 1.5 Hz), 128.41, 128.40, 128.3, 128.1, 104.77 (d, *J* = 15.2 Hz), 35.3, 35.2, 34.07 (d, *J* = 27.4 Hz), 33.75 (d, *J* = 2.3 Hz), 32.1, 29.4, 29.3, 22.42, 22.40, 14.00, 13.98. <sup>19</sup>F NMR (282 MHz, CDCl<sub>3</sub>) δ -111.3 (dt, *J* = 36.9, 17.2 Hz, 1F). IR (KBr): 3012, 2956, 2925, 2857, 1511, 1452, 1378, 1112, 798 cm<sup>-1</sup>. HRMS (EI) calcd. for C<sub>25</sub>H<sub>33</sub>F<sup>+</sup> [M<sup>+</sup>]: 352.2566, found 352.2569.

2,2'-(3-Fluoropent-2-ene-1,5-diyl)bis(methylbenzene) **3f**

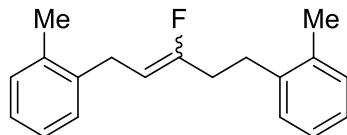

2,2'-(3,3-Difluoropentane-1,5-diyl)bis(methylbenzene) **1f** (28.8, 0.1 mmol) was added to a solution of tris(pentafluorophenyl)borane (10.1 mg, 20 mol%) in dry 1,4-difluorobenzene (1.0 ml). And the resulting mixture was refluxed for 24 h under argon atmosphere. The purification by column chromatography on silica gel (*n*-hexane) to give **3f** (17.3 mg, 60%) as a colorless oil. The ratio for *Z/E* isomers (9.1:1) was determined by <sup>19</sup>F-NMR. (*Z*)-**3f**: <sup>1</sup>H NMR (300 MHz, CDCl<sub>3</sub>) δ 7.23–7.06 (m, 8H), 4.64 (dt, *J* = 36.9, 7.4 Hz, 1H), 3.39 (d, *J* = 7.4 Hz, 2H), 2.84–2.77 (m, 2H), 2.49–2.38 (m, 2H), 2.32 (s, 3H), 2.30 (s, 3H); <sup>13</sup>C NMR (126 MHz, CDCl<sub>3</sub>) δ 159.12 (d, *J* = 254.6 Hz), 138.9, 138.70 (d, *J* = 1.5 Hz), 136.2, 135.9, 130.2, 130.1, 128.8, 128.6, 126.32 (d, *J* = 4.5 Hz), 126.2, 126.07, 126.05, 103.9 (d, *J* = 15.2 Hz), 32.9 (d, *J* = 27.6 Hz), 30.00 (d, *J* = 14.6 Hz), 27.7 (d, *J* = 5.8 Hz), 19.3, 19.2; <sup>19</sup>F NMR (282 MHz, CDCl<sub>3</sub>) δ -110.17 (dt, *J* = 36.2, 17.8 Hz, 1F). IR (KBr): 3056, 2921, 2877, 1710, 1594, 14886, 1255, 1145, 1101, 738 cm<sup>-1</sup>. MS (EI, *m/z*) 268 [M]<sup>+</sup>. HRMS (EI) calcd. for C<sub>19</sub>H<sub>21</sub>F<sup>+</sup> [M<sup>+</sup>]: 268.1627, found 268.1633.

2,2'-(3-Fluoropent-2-ene-1,5-diyl)bis(methoxybenzene) **3g**

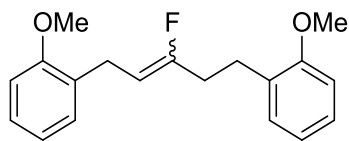

2,2'-(3,3-Difluoropentane-1,5-diyl)bis(methoxybenzene) **1g** (32.0, 0.1 mmol) was added to a solution of tris(pentafluorophenyl)borane (10.1 mg, 20 mol%) in dry 1,4-difluorobenzene (1.0 ml). And the resulting mixture was refluxed for 24 h under argon atmosphere. The purification by column chromatography on silica gel (*n*-hexane) to give **3g** (15.9 mg, 53%) as a colorless oil. The ratio for *Z/E* isomers (5.8:1) was determined by  $^{19}\text{F}$ -NMR. (*Z*)-**3g**:  $^1\text{H}$  NMR (300 MHz,  $\text{CDCl}_3$ )  $\delta$  7.26–7.16 (m, 4H), 6.94–6.72 (m, 4H), 4.69 (dt,  $J = 37.4, 7.5$  Hz, 1H), 3.82 (s, 3H), 3.80 (s, 3H), 3.38 (d,  $J = 7.4$  Hz, 2H), 2.85–2.79 (m, 2H), 2.51–2.40 (m, 2H).  $^{13}\text{C}$  NMR (126 MHz,  $\text{CDCl}_3$ )  $\delta$  159.69 (d,  $J = 254.1$  Hz), 157.4, 157.1, 130.0, 129.3, 129.2, 128.9, 127.3, 127.0, 120.39, 120.32, 110.13, 110.03, 103.41 (d,  $J = 15.0$  Hz), 55.26, 55.16, 32.22 (d,  $J = 27.4$  Hz), 27.44 (d,  $J = 1.4$  Hz), 24.01 (d,  $J = 6.3$  Hz).  $^{19}\text{F}$  NMR (282 MHz,  $\text{CDCl}_3$ )  $\delta$  -110.32 (dt,  $J = 37.4, 17.3$  Hz, 1F). IR (KBr): 3019, 2952, 2832, 1702, 1602, 1486, 1459, 1243, 1108, 1025  $\text{cm}^{-1}$ . HRMS (EI) calcd. for  $\text{C}_{19}\text{H}_{21}\text{FO}_2^+$  [ $\text{M}^+$ ]: 300.1526, found 300.1532.

4,4'-(3-Fluoropent-2-ene-1,5-diyl)bis(1,3-dimethylbenzene) **3n**

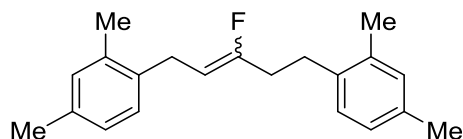

4,4'-(3,3-Difluoropentane-1,5-diyl)bis(1,3-dimethylbenzene) **1n** (31.6, 0.1 mmol) was added to a solution of tris(pentafluorophenyl)borane (10.1 mg, 20 mol%) in dry 1,4-difluorobenzene (1.0 ml). And the resulting mixture was refluxed for 24 h under argon atmosphere. The purification by column chromatography on silica gel (*n*-hexane) to give **3g** (15.0 mg, 50%) as a colorless oil. The ratio for *Z/E* isomers (9.1:1) was determined by  $^{19}\text{F}$ -NMR. (*Z*)-**3n**:  $^1\text{H}$  NMR (300 MHz,  $\text{CDCl}_3$ )  $\delta$  7.03–6.84 (m, 6H), 4.60 (dt,  $J = 37.1, 7.4$  Hz, 1H), 3.34 (d,  $J = 7.4$  Hz, 2H), 2.81–2.74 (m, 2H), 2.45–2.34 (m, 2H), 2.28 (s, 6H), 2.26 (s, 3H), 2.24 (s, 3H).  $^{13}\text{C}$  NMR (126 MHz,  $\text{CDCl}_3$ )  $\delta$  159.01 (d,  $J = 254.3$  Hz), 136.0, 135.9, 135.68, 135.66, 135.64, 135.63, 131.0, 130.9, 128.7, 128.5, 126.6, 126.5, 103.99 (d,  $J = 15.2$  Hz), 32.95 (d,  $J = 27.5$  Hz), 29.6, 27.25 (d,  $J = 5.8$  Hz), 20.90, 20.89, 19.22, 19.13.  $^{19}\text{F}$  NMR (282 MHz,  $\text{CDCl}_3$ )  $\delta$  -110.37 (dt,  $J = 37.0, 17.7$  Hz, 1F). IR (KBr): 3004, 2917, 2869, 1698, 1610, 1496, 1375, 1268, 1089  $\text{cm}^{-1}$ . HRMS (EI) calcd. for  $\text{C}_{21}\text{H}_{25}\text{F}^+$  [ $\text{M}^+$ ]: 296.1940, found 296.1954.

3,3'-(3-Fluoropent-2-ene-1,5-diyl)bis(1,2-dimethylbenzene) **3o**

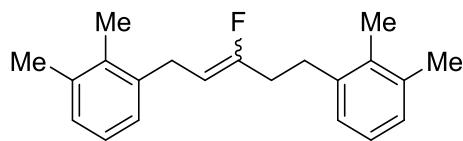

3,3'-(3,3-Difluoropentane-1,5-diyl)bis(1,2-dimethylbenzene) **1o** (31.6, 0.1 mmol) was added to a solution of tris(pentafluorophenyl)borane (10.1 mg, 20 mol%) in dry 1,4-difluorobenzene (1.0 ml). And the resulting mixture was refluxed for 24 h under argon atmosphere. The purification by column chromatography on silica gel (*n*-hexane) to give **3o** (20.5 mg, 70%) as a colorless oil. The ratio for *Z/E* isomers (8.7:1) was determined by <sup>19</sup>F-NMR. (*Z*)-**3o**: <sup>1</sup>H NMR (300 MHz, CDCl<sub>3</sub>) δ 7.02–6.94 (m, 6H), 4.62 (dt, *J* = 37.1, 7.4 Hz, 1H), 3.41 (d, *J* = 7.3 Hz, 2H), 2.86–2.81 (m, 2H), 2.49–2.39 (m, 2H), 2.28 (s, 3H), 2.27 (s, 3H), 2.19 (s, 3H), 2.18 (s, 3H). <sup>13</sup>C NMR (126 MHz, CDCl<sub>3</sub>) δ 158.8 (d, *J* = 254.3 Hz), 138.8, 138.63 (d, *J* = 1.5 Hz), 136.9, 136.84, 134.81, 134.4, 127.99, 127.98, 126.9, 126.6, 125.44, 125.43, 104.14 (d, *J* = 15.1 Hz), 33.16 (d, *J* = 27.5 Hz), 30.8, 28.40 (d, *J* = 5.6 Hz), 20.7, 20.6, 14.9. <sup>19</sup>F NMR (282 MHz, CDCl<sub>3</sub>) δ -109.43 (dt, *J* = 37.1, 17.7 Hz, 1F). IR (KBr): 3016, 2917, 1702, 1583, 1452, 1382, 1132, 732, 779 cm<sup>-1</sup>. MS (EI, *m/z*) 296 [M]<sup>+</sup>. HRMS (EI) calcd. for C<sub>21</sub>H<sub>25</sub>F<sup>+</sup> [M<sup>+</sup>]: 296.1940, found 296.1949.

2,2'-(3-Fluoropent-2-ene-1,5-diyl)bis(bromobenzene) **3j**

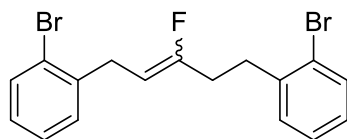

2,2'-(3,3-Difluoropentane-1,5-diyl)bis(bromobenzene) **1j** (41.5, 0.1 mmol) was added to a solution of tris(pentafluorophenyl)borane (10.1 mg, 20 mol%) in dry 1,4-difluorobenzene (1.0 ml). And the resulting mixture was refluxed for 48 h under argon atmosphere. The purification by column chromatography on silica gel (*n*-hexane) to give **3j** (15.1 mg, 38%) as a colorless oil. The ratio for *Z/E* isomers (25:1) was determined by <sup>19</sup>F-NMR. (*Z*)-**3j**: <sup>1</sup>H NMR (300 MHz, CDCl<sub>3</sub>) δ 7.52 (dd, *J* = 7.8, 4.5 Hz, 2H), 7.24–7.02 (m, 6H), 4.69 (dt, *J* = 36.6, 7.5 Hz, 1H), 3.49 (d, *J* = 7.5 Hz, 2H), 3.06–2.93 (m, 2H), 2.62–2.46 (m, 2H); <sup>13</sup>C NMR (126 MHz, CDCl<sub>3</sub>) δ 159.24 (d, *J* = 255.9 Hz), 139.8, 139.78 (d, *J* = 1.8 Hz), 132.8, 132.6, 130.7, 130.1, 127.9, 127.7, 127.4, 124.34, 124.29, 103.31 (d, *J* = 14.8 Hz), 33.1, 32.21 (d, *J* = 27.4 Hz), 30.4 (d, *J* = 5.9 Hz); <sup>19</sup>F NMR (282 MHz, CDCl<sub>3</sub>) δ -108.96 (dt, *J* = 36.4, 18.1 Hz). IR (KBr): 3056, 2925, 1714, 1558, 1463, 1438, 1153, 1022, 754, 659 cm<sup>-1</sup>. HRMS (EI) calcd. for C<sub>17</sub>H<sub>15</sub>Br<sub>2</sub>F<sup>+</sup> [M<sup>+</sup>]: 395.9525, found 395.9547.

2,2'-(3-Fluoropent-2-ene-1,5-diyl)bis(chlorobenzene) **3k**

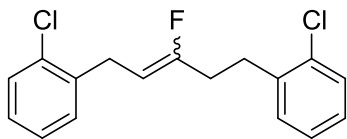

2,2'-(3,3-Difluoropentane-1,5-diyl)bis(chlorobenzene) **1k** (32.9 mg, 0.1 mmol) was added to a solution of tris(pentafluorophenyl)borane (10.1 mg, 20 mol%) in dry 1,4-difluorobenzene (1.0 ml). And the resulting mixture was refluxed for 48 h under argon atmosphere. The purification by column chromatography on silica gel (*n*-hexane) to give **3k** (18.1 mg, 55%) as a colorless oil. The ratio for *Z/E* isomers (8.6:1) was determined by <sup>19</sup>F-NMR. (*Z*)-**3k**: <sup>1</sup>H NMR (300 MHz, CDCl<sub>3</sub>) δ 7.42–7.26 (m, 2H), 7.23–7.04 (m, 6H), 4.68 (dt, *J* = 36.5, 7.6 Hz, 1H), 3.49 (d, *J* = 7.5 Hz, 2H), 2.99–2.85 (m, 2H), 2.52 (dt, *J* = 17.9, 7.6 Hz, 2H). <sup>13</sup>C NMR (126 MHz, CDCl<sub>3</sub>) δ 159.34 (d, *J* = 255.8 Hz), 138.16, 138.11, 138.0, 133.87, 133.85, 130.7, 130.0, 129.5, 129.3, 127.7, 127.4, 126.8, 103.18 (d, *J* = 14.8 Hz), 32.07 (d, *J* = 27.4 Hz), 30.5, 27.72 (d, *J* = 6.1 Hz). <sup>19</sup>F NMR (282 MHz, CDCl<sub>3</sub>) δ -109.22 (dt, *J* = 36.4, 18.1 Hz, 1F). IR (KBr): 3072, 2911, 1706, 1565, 1463, 1438, 1141, 1041, 757 cm<sup>-1</sup>. HRMS (EI) calcd. for C<sub>17</sub>H<sub>15</sub>Cl<sub>2</sub>F<sup>+</sup> [*M*<sup>+</sup>]: 308.0535, found 308.0558.

4,4'-(3-Fluoropentane-1,5-diyl)bis(fluorobenzene) **3u**

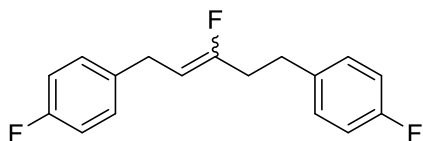

4,4'-(3,3-Difluoropentane-1,5-diyl)bis(fluorobenzene) **1u** (29.6 mg, 0.1 mmol) was added to a solution of tris(pentafluorophenyl)borane (10.1 mg, 20 mol%) in dry 1,4-difluorobenzene (1.0 ml). And the resulting mixture was refluxed for 48 h under argon atmosphere. The purification by column chromatography on silica gel (*n*-hexane) to give **3u** (14.9 mg, 52%) as a colorless oil. The ratio for *Z/E* isomers (11.1:1) was determined by <sup>19</sup>F-NMR. (*Z*)-**3u**: <sup>1</sup>H NMR (300 MHz, CDCl<sub>3</sub>) δ 7.17–7.07 (m, 2H), 7.02–6.86 (m, 6H), 4.60 (dt, *J* = 36.6, 7.7 Hz, 1H), 3.33 (d, *J* = 7.6 Hz, 2H), 2.82 (dd, *J* = 14.6, 7.3 Hz, 2H), 2.52–2.44 (m, 2H). <sup>13</sup>C NMR (126 MHz, CDCl<sub>3</sub>) δ 161.43 (d, *J* = 243.8 Hz), 161.32 (d, *J* = 243.6 Hz), 158.78 (d, *J* = 254.9 Hz), 136.22, 136.19, 136.07 (d, *J* = 3.0 Hz), 136.06 (d, *J* = 2.9 Hz), 129.75 (d, *J* = 41.2 Hz), 129.69 (d, *J* = 41.2 Hz), 115.2, 115.1, 115.08, 115.00, 104.95 (d, *J* = 15.1 Hz), 34.05 (d, *J* = 27.4 Hz), 31.6, 28.95 (d, *J* = 6.0 Hz). <sup>19</sup>F NMR (282 MHz, CDCl<sub>3</sub>) δ -110.75 (dt, *J* = 36.6, 17.7 Hz, 1F), -117.18–117.34 (m, 1F), -117.43–117.68 (m, 1F). IR (KBr): 3045, 2929, 2857, 1710, 1606, 1519, 1430, 1153, 1089, 806 cm<sup>-1</sup>. HRMS (EI) calcd. for C<sub>17</sub>H<sub>15</sub>F<sub>3</sub><sup>+</sup> [*M*<sup>+</sup>]: 276.1126, found 276.1139.

(2-Fluoroprop-1-ene-1,3-diyl)dibenzene **3aa** (Nahra et al., 2015)

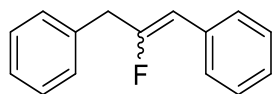

(2,2-Difluoropropane-1,3-diyl)dibenzene **1aa** (23.2 mg, 0.1 mmol) was added to a solution of tris(pentafluorophenyl)borane (10.1 mg, 20 mol%) in dry 1,4-difluorobenzene (1.0 ml). And the resulting mixture was refluxed for 24 h under argon atmosphere. The purification by column chromatography on silica gel (*n*-hexane) to give **3aa** (11.0 mg, 50%) as a colorless oil. The ratio for Z/E isomers (16.6:1) was determined by <sup>19</sup>F-NMR. (Z)-**3aa**: <sup>1</sup>H NMR (300 MHz, CDCl<sub>3</sub>) δ 7.55–7.40 (m, 2H), 7.37–7.17 (m, 8H), 5.52 (d, *J* = 38.8 Hz, 1H), 3.65 (d, *J* = 17.0 Hz, 2H); <sup>19</sup>F NMR (282 MHz, CDCl<sub>3</sub>) δ -100.15 (dt, *J* = 38.7, 17.0 Hz); MS (EI, *m/z*) 212 [M]<sup>+</sup>

(Z)-(1-Fluoroprop-1-ene-1,3-diyl)dibenzene **3bb** (Yang et al., 2013)

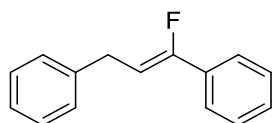

(1,1-Difluoropropane-1,3-diyl)dibenzene **1bb** (23.2 mg, 0.1 mmol) was added to a solution of tris(pentafluorophenyl)borane (10.1 mg, 20 mol%) in dry 1,4-difluorobenzene (1.0 ml). And the resulting mixture was refluxed for 24 h under argon atmosphere. The purification by column chromatography on silica gel (*n*-hexane) to give Z-**3bb** (8.8 mg, 41%) as a colorless oil. <sup>1</sup>H NMR (300 MHz, CDCl<sub>3</sub>) δ 7.54–7.44 (m, 2H), 7.37–7.19 (m, 8H), 5.60 (dt, *J* = 36.4, 7.7 Hz, 1H), 3.65 (d, *J* = 7.7 Hz, 2H); <sup>19</sup>F NMR (282 MHz, CDCl<sub>3</sub>) δ -121.09 (d, *J* = 36.4 Hz, 1F); MS (EI, *m/z*) 212 [M]<sup>+</sup>

(Z)-(1-Fluoropent-1-en-1-yl)benzene **3cc** (Zhang et al., 2009)

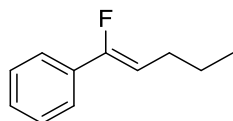

(1,1-Difluoropentyl)benzene **1cc** (18.4 mg, 0.1 mmol) was added to a solution of tris(pentafluorophenyl)borane (10.1 mg, 20 mol%) in dry 1,4-difluorobenzene (1.0 ml). And the resulting mixture was refluxed for 24 h under argon atmosphere. The purification by column chromatography on silica gel (*n*-hexane) to give Z-**3cc** (4.2 mg, 25%) as a colorless oil. <sup>1</sup>H NMR (300 MHz, CDCl<sub>3</sub>) δ 7.50 (dd, *J* = 8.2, 1.4 Hz, 2H), 7.47–7.29 (m, 3H), 5.40 (dt, *J* = 37.6, 7.6 Hz, 1H), 2.27–2.20 (m, 2H), 1.56–1.47 (m, 2H), 0.97 (t, *J* = 7.4 Hz, 3H); <sup>19</sup>F NMR (282 MHz, CDCl<sub>3</sub>) δ -121.38 (d, *J* = 37.6 Hz); MS (EI, *m/z*) 164 [M]<sup>+</sup>

4-Fluoro-1,2,3,6-tetrahydro-1,1'-biphenyl **3dd** (Vandamme and Paquin, 2017)

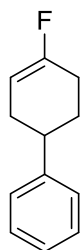

(4,4-Difluorocyclohexyl)benzene **3dd** (19.8 mg, 0.1 mmol) was added to a solution of tris(pentafluorophenyl)borane (10.1 mg, 20 mol%) in dry 1,4-difluorobenzene (1.0 ml). And the resulting mixture was refluxed for 24 h under argon atmosphere. The purification by column chromatography on silica gel (*n*-hexane) to give *Z*-**3dd** (15.6 mg, 82%) as a colorless oil. <sup>1</sup>H NMR (300 MHz, CDCl<sub>3</sub>) δ 7.38–7.28 (m, 2H), 7.28–7.16 (m, 3H), 5.30–5.23 (m, 1H), 2.84–2.74 (m, 1H), 2.29–2.21 (m, 4H), 2.02–1.89 (m, 2H); <sup>19</sup>F NMR (282 MHz, CDCl<sub>3</sub>) δ -103.35–103.72 (m, 1F); MS (EI, *m/z*) 176 [M]<sup>+</sup>

1-Fluoro-4-pentylcyclohex-1-ene **3ee** (Vandamme et al., 2017)

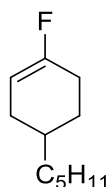

1,1-Difluoro-4-pentylcyclohexane **1ee** (19.0 mg, 0.1 mmol) was added to a solution of tris(pentafluorophenyl)borane (10.1 mg, 20 mol%) in dry 1,4-difluorobenzene (1.0 ml). And the resulting mixture was refluxed for 24 h under argon atmosphere. The purification by column chromatography on silica gel (*n*-hexane) to give *Z*-**3ee** (11.1 mg, 64%) as a colorless oil. <sup>1</sup>H NMR (300 MHz, CDCl<sub>3</sub>) δ 5.17–5.10 (m, 1H), 2.23–2.09 (m, 3H), 1.84–1.80 (m, 1H), 1.71–1.62 (m, 1H), 1.52–1.46 (m, 1H), 1.40–1.20 (m, 9H), 0.88 (t, *J* = 6.8 Hz, 3H); <sup>19</sup>F NMR (282 MHz, CDCl<sub>3</sub>) δ -103.59–103.77 (m, 1F); MS (EI, *m/z*) 170 [M]<sup>+</sup>

1-Fluoro-2-phenylcyclohept-1-ene **3ff**

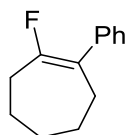

1,1-Difluoro-2-phenylcycloheptane **1ff** (21.0 mg, 0.1 mmol) was added to a solution of tris(pentafluorophenyl)borane (10.1 mg, 20 mol%) in dry 1,4-difluorobenzene (1.0 ml). And the resulting mixture was refluxed for 48 h under argon atmosphere. The purification by column chromatography on silica gel (*n*-hexane) to give **3ff** with 1-fluoro-7-phenylcyclohept-1-ene **3ff'** in a 3.3:1 ratio, (9.4 mg, 45%) as a colorless oil. 1-fluoro-2-phenylcyclohept-1-ene **3ff**: <sup>1</sup>H NMR (300 MHz, CDCl<sub>3</sub>) δ 7.42–7.26 (m, 5H), 2.63–2.48 (m, 2H), 2.49–2.36 (m, 2H), 1.86–1.70 (m, 6H). <sup>13</sup>C NMR (126 MHz, CDCl<sub>3</sub>) δ 159.30 (d, *J* = 258.1 Hz), 139.5, 127.97, 127.91, 126.33, 118.73 (d, *J* = 11.5 Hz), 31.79 (d, *J* = 29.6 Hz), 31.54 (d, *J* = 6.3 Hz),

31.2, 26.97 (d,  $J = 1.6$  Hz), 24.67 (d,  $J = 3.3$  Hz).  $^{19}\text{F}$  NMR (282 MHz,  $\text{CDCl}_3$ )  $\delta$  -94.81 (t,  $J = 17.0$  Hz, 1F). 1-fluoro-7-phenylcyclohept-1-ene **3ff'**:  $^1\text{H}$  NMR (300 MHz,  $\text{CDCl}_3$ )  $\delta$  7.25–7.14 (m, 5H), 5.59 (dt,  $J = 23.9$ , 6.4 Hz, 1H), 3.86–3.75 (m, 1H), 2.20–2.11 (m, 2H), 2.07–1.92 (m, 2H), 1.63–1.43 (m, 4H).  $^{13}\text{C}$  NMR (126 MHz,  $\text{CDCl}_3$ )  $\delta$  162.30 (d,  $J = 246.3$  Hz), 141.05 (d,  $J = 1.4$  Hz), 128.4, 127.7, 126.4, 108.24 (d,  $J = 23.3$  Hz), 47.96 (d,  $J = 28.0$  Hz), 32.28 (d,  $J = 9.3$  Hz), 27.1, 24.1, 22.22 (d,  $J = 11.4$  Hz).  $^{19}\text{F}$  NMR (282 MHz,  $\text{CDCl}_3$ )  $\delta$  -94.26 (dd,  $J = 23.8$ , 13.0 Hz, 1F). IR (KBr): 3016, 2933, 2861, 1681, 1594, 1490, 1442, 1351, 1176, 1022, 750, 698  $\text{cm}^{-1}$ . HRMS (EI) calcd. for  $\text{C}_{13}\text{H}_{15}\text{F}^+$  [ $\text{M}^+$ ]: 190.1158, found 190.1168.

#### 1-Fluorocyclododec-1-ene **3gg**

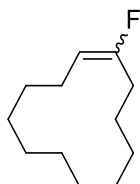

1,1-Difluorocyclododecane **1gg** (20.4 mg, 0.1 mmol) was added to a solution of tris(pentafluorophenyl)borane (10.1 mg, 20 mol%) in dry 1,4-difluorobenzene (1.0 ml). And the resulting mixture was refluxed for 48 h under argon atmosphere. The purification by column chromatography on silica gel (*n*-hexane) to give **3gg** (14.9 mg, 71%) as a colorless oil. The ratio for *Z/E* isomers (3.3:1) was determined by  $^{19}\text{F}$ -NMR. (*Z*)-**3gg**:  $^1\text{H}$  NMR (300 MHz,  $\text{CDCl}_3$ )  $\delta$  4.55 (dt,  $J = 37.8$ , 7.8 Hz, 1H), 2.28–2.19 (m, 1H), 2.19–2.11 (m, 3H), 1.39–1.26 (m,  $J = 12.0$  Hz, 16H).  $^{13}\text{C}$  NMR (126 MHz,  $\text{CDCl}_3$ )  $\delta$  159.1 (d,  $J = 252.5$  Hz), 107.2 (d,  $J = 15.9$  Hz), 31.7 (d,  $J = 28.4$  Hz), 26.2 (d,  $J = 1.7$  Hz), 25.9, 25.7, 25.2, 24.6, 24.65, 24.61, 22.9, 22.87 (d,  $J = 4.4$  Hz).  $^{19}\text{F}$  NMR (282 MHz,  $\text{CDCl}_3$ )  $\delta$  -112.85 (dt,  $J = 37.8$ , 21.6 Hz, 1F). (*E*)-**3gg**:  $^1\text{H}$  NMR (300 MHz,  $\text{CDCl}_3$ )  $\delta$  4.96 (dt,  $J = 23.4$ , 8.2 Hz, 1H), 2.35–2.30 (m, 2H), 2.02–1.95 (m, 2H), 1.65–1.41 (m, 16H).  $^{13}\text{C}$  NMR (126 MHz,  $\text{CDCl}_3$ )  $\delta$  160.0 (d,  $J = 244.9$  Hz), 106.7 (d,  $J = 21.7$  Hz), 27.1 (d,  $J = 2.1$  Hz), 26.9 (d,  $J = 22.7$  Hz), 24.6, 24.4, 24.2, 23.9, 23.55, 22.58 (d,  $J = 9.4$  Hz), 22.13, 21.93.  $^{19}\text{F}$  NMR (282 MHz,  $\text{CDCl}_3$ )  $\delta$  -106.15–106.71 (m, 1F). IR (KBr): 2921, 2857, 1695, 1452, 1068  $\text{cm}^{-1}$ . HRMS (EI) calcd. for  $\text{C}_{12}\text{H}_{21}\text{F}^+$  [ $\text{M}^+$ ]: 184.1627, found 184.1646.

#### 1-Fluorocyclopentadec-1-ene **3hh**

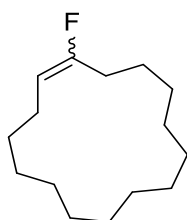

1,1-Difluorocyclopentadecane **1hh** (24.6, 0.1 mmol) was added to a solution of tris(pentafluorophenyl)borane (10.1 mg, 20 mol%) in dry 1,4-difluorobenzene (1.0 ml). And the resulting mixture was refluxed for 48 h under argon atmosphere. The  $^{19}\text{F}$ -NMR showed that the *Z/E* ratio was 3:1. Then the purification by column chromatography on silica gel (*n*-hexane) to give **3hh** (18.8 mg, 80% yield)

as a colorless oil. The ratio for *Z/E* isomers (3.0:1) was determined by  $^{19}\text{F}$ -NMR. (*Z*)-**3hh**:  $^1\text{H}$  NMR (300 MHz,  $\text{CDCl}_3$ )  $\delta$  4.45 (dt,  $J = 38.6, 7.3$  Hz, 1H), 2.26–2.17 (m, 1H), 2.20–1.93 (m, 3H), 1.53–1.45 (m, 3H), 1.44–1.30 (m, 19H);  $^{13}\text{C}$  NMR (126 MHz,  $\text{CDCl}_3$ )  $\delta$  159.30 (d,  $J = 252.9$  Hz), 105.96 (d,  $J = 16.2$  Hz), 31.43 (d,  $J = 28.0$  Hz), 28.55 (d,  $J = 1.4$  Hz), 27.2, 27.1, 27.0, 26.96, 26.90, 26.89, 26.87, 26.8, 25.6, 25.1, 22.7 (d,  $J = 4.7$  Hz);  $^{19}\text{F}$  NMR (282 MHz,  $\text{CDCl}_3$ )  $\delta$  -111.35 (dt,  $J = 38.7, 19.4$  Hz, 1F). IR (KBr): 2925, 2861, 1706, 1448, 1340  $\text{cm}^{-1}$ . MS (EI,  $m/z$ ) 226  $[\text{M}]^+$ . HRMS (EI) calcd. for  $\text{C}_{15}\text{H}_{27}\text{F} + [\text{M}]^+$ : 226.2097, found 226.2088.

### General procedure for Friedel-Crafts reaction of secondary monofluoroalkanes **4**, related to Figure 3.

In a flame-dried test tube, monofluoroalkanes **4a-4s** (0.1 mmol) were added to a solution of  $\text{B}(\text{C}_6\text{F}_5)_3$  (2 mol%) in dry HFIP (2.0 mL) at room temperature in a glovebox filled with argon. Subsequently, the tube was sealed with a rubber septum, removed from the glovebox and stirred at 50 °C for 2-4 h under a positive pressure of argon with a balloon. The resulting mixture was allowed to cool to room temperature and washed with water, extracted with  $\text{CH}_2\text{Cl}_2$ , dried over  $\text{Na}_2\text{SO}_4$ , filtered and then concentrated *in vacuo*. The residue was purified by column chromatography on silica gel using *n*-hexane as the eluent to give the desired substituted indane derivatives **5a-5s**.

#### 1-Phenethyl-2,3-dihydro-1*H*-indene **5a** (Khalaf and Roberts, 1972)

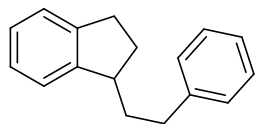

(3-Fluoropentane-1,5-diyl)dibenzene **4a** (24.2 mg, 0.1 mmol) was added to a solution of tris(pentafluorophenyl)borane (1.0 mg, 2 mol%) in dry  $(\text{CF}_3)_2\text{CHOH}$  (2.0 ml). And the resulting mixture was stirred at 50 °C for 2 h under argon atmosphere. The purification by column chromatography on silica gel (*n*-hexane) to give **5a** (20.5 mg, 91%) as a colorless oil.  $^1\text{H}$  NMR (300 MHz,  $\text{CDCl}_3$ )  $\delta$  7.40–7.28 (m, 2H), 7.28–7.18 (m, 4H), 7.18–7.07 (m, 3H), 3.15–3.04 (m, 2H), 2.78–2.67 (m, 2H), 1.91–1.80 (m, 1H), 1.74–1.60 (m, 4H).  $^{13}\text{C}$  NMR (126 MHz,  $\text{CDCl}_3$ )  $\delta$  140.9, 140.5, 137.0, 129.2, 129.1, 128.8, 128.2, 125.9, 125.6, 125.5, 43.3, 39.5, 29.7, 26.4, 19.1. MS -EI: 222.

#### 4-Methyl-1-(2-methylphenethyl)-2,3-dihydro-1*H*-indene **5b**

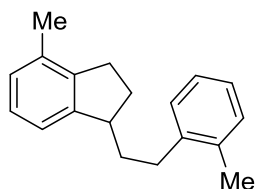

2,2'-(3-Fluoropentane-1,5-diyl)bis(methylbenzene) **4b** (27.0 mg, 0.1 mmol) was added to a solution of tris(pentafluorophenyl)borane (1.0 mg, 2 mol%) in dry  $(\text{CF}_3)_2\text{CHOH}$  (2.0 ml). And the resulting mixture was stirred at 50 °C for 5 h under argon atmosphere. The purification by column chromatography on silica gel



(*n*-hexane) to give **5a** (22.5 mg, 85%) as a colorless oil. <sup>1</sup>H NMR (300 MHz, CDCl<sub>3</sub>) δ 7.20–7.09 (m, 4H), 7.11–6.99 (m, 3H), 3.08–3.00 (m, 2H), 2.81–2.69 (m, 2H), 2.60–2.55 (m, 1H), 2.37 (s, 3H), 2.24 (s, 3H), 1.96–1.88 (m, 1H), 1.88–1.74 (m, 1H), 1.72–1.64 (m, 2H). <sup>13</sup>C NMR (75 MHz, CDCl<sub>3</sub>) δ 140.7, 139.2, 136.5, 136.3, 135.4, 130.3, 130.2, 127.2, 126.7, 126.0, 125.6, 125.1, 40.5, 38.3, 26.8, 25.7, 19.7, 19.6, 18.9. IR(KBr): 3016, 2857, 2933, 1587, 1490, 1455, 1371, 1033, 782, 740 cm<sup>-1</sup>. MS-EI: 250. HRMS (EI) calcd. for C<sub>19</sub>H<sub>22</sub><sup>+</sup> [M<sup>+</sup>]: 250.1722, found 250.1720.

#### 6-Methyl-1-(4-methylphenethyl)-2,3-dihydro-1*H*-indene **5c**

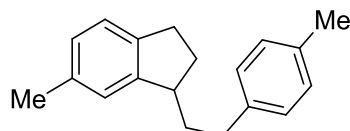

4,4'-(3-Fluoropentane-1,5-diyl)bis(methylbenzene) **4c** (27 mg, 0.1 mmol) was added to a solution of tris(pentafluorophenyl)borane (1.0 mg, 2 mol%) in dry (CF<sub>3</sub>)<sub>2</sub>CHOH (2.0 ml). And the resulting mixture was stirred at 50 °C for 5 h under argon atmosphere. The purification by column chromatography on silica gel (*n*-hexane) to give **5c** (22.9 mg, 90%) as a colorless oil. <sup>1</sup>H NMR (300 MHz, CDCl<sub>3</sub>) δ 7.18–7.03 (m, 5H), 7.03–6.94 (m, 2H), 3.07 (dd, *J* = 13.2, 4.3 Hz, 1H), 2.99 (dt, *J* = 14.8, 4.7 Hz, 1H), 2.75–2.62 (m, 2H), 2.55–2.49 (m, 1H), 2.34 (s, 3H), 2.31 (s, 3H), 1.92–1.77 (m, 1H), 1.73–1.56 (m, 3H). <sup>13</sup>C NMR (75 MHz, CDCl<sub>3</sub>) δ 140.5, 138.0, 135.3, 134.8, 133.9, 129.4, 129.09, 129.04, 128.95, 126.56, 42.96, 39.59, 29.37, 26.33, 21.11, 21.07, 19.28. IR(KBr): 3012, 2857, 2937, 1614, 1498, 1442, 802 cm<sup>-1</sup>. MS-EI: 250, HRMS (EI) calcd. for C<sub>19</sub>H<sub>22</sub><sup>+</sup> [M<sup>+</sup>]: 250.1722, found 250.1715.

#### 6-Ethyl-1-(4-ethylphenethyl)-2,3-dihydro-1*H*-indene **5d**

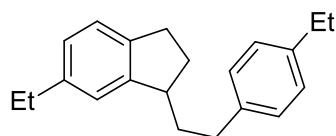

4,4'-(3-Fluoropentane-1,5-diyl)bis(ethylbenzene) **4d** (29.8 mg, 0.1 mmol) was added to a solution of tris(pentafluorophenyl)borane (1.0 mg, 2 mol%) in dry (CF<sub>3</sub>)<sub>2</sub>CHOH (2.0 ml). And the resulting mixture was stirred at 50 °C for 3 h under argon atmosphere. The purification by column chromatography on silica gel (*n*-hexane) to give **5d** (26.6 mg, 93%) as a colorless oil. <sup>1</sup>H NMR (300 MHz, CDCl<sub>3</sub>) δ 7.22–7.06 (m, 4H), 7.08–6.95 (m, 3H), 3.09–3.00 (m, 2H), 2.72–2.55 (m, 7H), 1.92–1.80 (m, 1H), 1.77–1.58 (m, 3H), 1.29–1.17 (m, 6H). <sup>13</sup>C NMR (75 MHz, cdcl<sub>3</sub>) δ 141.7, 141.3, 140.4, 138.2, 134.2, 129.1, 129.0, 128.3, 127.7, 125.3, 43.0, 39.6, 29.4, 28.5, 28.5, 26.5, 19.2, 15.8, 15.7. IR(KBr): 3012, 2933, 2865, 1614, 1508, 1452, 1052, 835, 809 cm<sup>-1</sup>. EI-MS: 278. HRMS (EI) calcd. for C<sub>21</sub>H<sub>26</sub><sup>+</sup> [M<sup>+</sup>]: 278.2035, found 278.2036.

#### 6-Butyl-1-(4-butylphenethyl)-2,3-dihydro-1*H*-indene **5e**

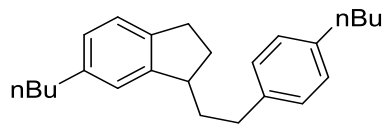

4,4'-(3-Fluoropentane-1,5-diyl)bis(butylbenzene) **4e** (35.4 mg, 0.1 mmol) was added to a solution of tris(pentafluorophenyl)borane (1.0 mg, 2 mol%) in dry (CF<sub>3</sub>)<sub>2</sub>CHOH (2.0 ml). And the resulting mixture was stirred at 50 °C for 5 h under argon atmosphere. The purification by column chromatography on silica gel (*n*-hexane) to give **5e** (28.8 mg, 86%) as a colorless oil. <sup>1</sup>H NMR (300 MHz, CDCl<sub>3</sub>) δ 7.13-7.10 (m, 4H), 7.04-6.98 (m, 3H), 3.13-2.95 (m, 2H), 2.78-2.49 (m, 7H), 1.93-1.81 (m, 1H), 1.74-1.51 (m, 7H), 1.43-1.27 (m, 4H), 0.98-0.85 (m, 6H). <sup>13</sup>C NMR (126 MHz, CDCl<sub>3</sub>) δ 140.4, 140.3, 140.1, 138.2, 134.2, 129.1, 128.9, 128.8, 128.3, 125.9, 43.1, 39.7, 35.5, 35.3, 35.2, 33.9, 33.8, 29.4, 26.6, 22.5, 22.4, 19.2, 14.1; IR (KBr): 3008, 2937, 2857, 1610, 1508, 1455, 1375, 806, 838 cm<sup>-1</sup>. MS (EI, *m/z*) 334 [M]<sup>+</sup>. HRMS (EI) calcd. for C<sub>25</sub>H<sub>34</sub><sup>+</sup> [M<sup>+</sup>]: 334.2661, found 334.2663.

#### 6-Methoxy-1-(4-methoxyphenethyl)-2,3-dihydro-1*H*-indene **5f**

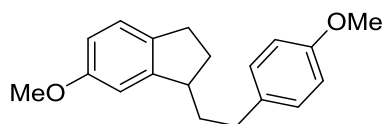

4,4'-(3-Fluoropentane-1,5-diyl)bis(methoxybenzene) **4f** (30.2 mg, 0.1 mmol) was added to a solution of tris(pentafluorophenyl)borane (1.0 mg, 2 mol%) in dry (CF<sub>3</sub>)<sub>2</sub>CHOH (2.0 ml). And the resulting mixture was stirred at 50 °C for 5 h under argon atmosphere. The purification by column chromatography on silica gel (*n*-hexane) to give **5f** (12.4 mg, 44%) as a colorless oil. <sup>1</sup>H NMR (300 MHz, CDCl<sub>3</sub>) δ 7.13 (d, *J* = 8.5 Hz, 2H), 7.04-7.01 (m, 1H), 6.86 (d, *J* = 8.5 Hz, 2H), 6.74-6.69 (m, 2H), 3.80 (s, 3H), 3.76 (s, 3H), 3.09-2.95 (m, 2H), 2.73-2.67 (m, 2H), 1.87-1.82 (m, 1H), 1.68-1.59 (m, 4H); <sup>13</sup>C NMR (126 MHz, CDCl<sub>3</sub>) δ 157.8, 157.2, 141.6, 133.0, 130.1, 129.9, 129.1, 113.7, 113.6, 111.9, 55.3, 55.2, 42.4, 39.9, 28.9, 26.5, 19.4. IR (KBr): 3004, 2915, 2840, 1610, 1579, 1519, 1243, 1033, 846, 794 cm<sup>-1</sup>. MS-EI: 282. HRMS (EI) calcd. for C<sub>19</sub>H<sub>22</sub>O<sub>2</sub><sup>+</sup> [M<sup>+</sup>]: 282.1620, found 282.1622.

#### 4-Bromo-1-(2-bromophenethyl)-2,3-dihydro-1*H*-indene **5g**

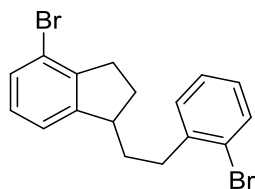

2,2'-(3-Fluoropentane-1,5-diyl)bis(bromobenzene) **4g** (40.0 mg, 0.1 mmol) was added to a solution of tris(pentafluorophenyl)borane (1.0 mg, 2 mol%) in dry (CF<sub>3</sub>)<sub>2</sub>CHOH (2.0 ml). And the resulting mixture was stirred at 50 °C for 5 h under argon atmosphere. The purification by column chromatography on silica gel (*n*-hexane) to give **5g** (32.9 mg, 80%) as a colorless oil. <sup>1</sup>H NMR (300 MHz, CDCl<sub>3</sub>) δ 7.58 (d, *J* = 7.9 Hz, 1H), 7.42 (d, *J* = 7.8 Hz, 1H), 7.29-7.18 (m, 2H), 7.09-7.04 (m, 1H), 7.00 (t, *J* = 7.8 Hz, 1H), 3.32-3.14 (m,

2H), 3.04–2.82 (m, 2H), 2.73–2.57 (m, 1H), 2.06–1.90 (m, 1H), 1.88–1.74 (m, 1H), 1.74–1.55 (m, 2H);  $^{13}\text{C}$  NMR (126 MHz,  $\text{CDCl}_3$ )  $\delta$  142.9, 139.7, 136.3, 133.0, 131.9, 130.1, 128.3, 127.9, 127.2, 126.7, 125.7, 124.9, 43.3, 37.7, 30.4, 25.4, 18.7. IR (KBr): 3056, 2933, 2873, 1554, 1434, 1135, 1037, 808, 777, 719  $\text{cm}^{-1}$ . HRMS (EI) calcd. for  $\text{C}_{17}\text{H}_{16}\text{Br}_2^+$  [ $\text{M}^+$ ]: 377.9619, found 377.9622.

#### 4-Chloro-1-(2-chlorophenethyl)-2,3-dihydro-1*H*-indene **5h**

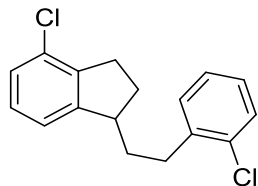

2,2'-(3-Fluoropentane-1,5-diyl)bis(chlorobenzene) **4h** (31.1 mg, 0.1 mmol) was added to a solution of tris(pentafluorophenyl)borane (1.0 mg, 2 mol%) in dry  $(\text{CF}_3)_2\text{CHOH}$  (2.0 ml). And the resulting mixture was stirred at 50 °C for 5 h under argon atmosphere. The purification by column chromatography on silica gel (*n*-hexane) to give **5h** (21.8 mg, 75%) as a colorless oil.  $^1\text{H}$  NMR (300 MHz,  $\text{CDCl}_3$ )  $\delta$  7.44–7.35 (m, 1H), 7.28–7.12 (m, 5H), 7.07 (t,  $J = 7.7$  Hz, 1H), 3.28–3.14 (m, 2H), 2.98–2.79 (m, 2H), 2.70–2.60 (m, 1H), 1.99–1.77 (m, 2H), 1.70–1.58 (m, 2H);  $^{13}\text{C}$  NMR (126 MHz,  $\text{CDCl}_3$ )  $\delta$  142.7, 138.1, 134.8, 134.4, 134.3, 131.8, 129.7, 127.7, 127.6, 126.7, 126.5, 126.2, 40.9, 37.7, 27.4, 25.4, 18.4; IR (KBr): 3056, 2933, 2873, 1594, 1563, 1444, 1143, 1051, 773, 682  $\text{cm}^{-1}$ . MS (EI,  $m/z$ ) 290 [ $\text{M}^+$ ]. HRMS (EI) calcd. for  $\text{C}_{17}\text{H}_{16}\text{Cl}_2^+$  [ $\text{M}^+$ ]: 290.0629, found 290.0642.

#### 6-Fluoro-1-(4-fluorophenethyl)-2,3-dihydro-1*H*-indene **5i**

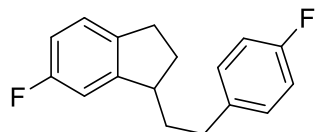

4,4'-(3-Fluoropentane-1,5-diyl)bis(fluorobenzene) **4i** (27.8 mg, 0.1 mmol) was added to a solution of tris(pentafluorophenyl)borane (1.0 mg, 2 mol%) in dry  $(\text{CF}_3)_2\text{CHOH}$  (2.0 ml). And the resulting mixture was stirred at 50 °C for 5 h under argon atmosphere. The purification by column chromatography on silica gel (*n*-hexane) to give **5i** (17.6 mg, 68%) as a colorless oil.  $^1\text{H}$  NMR (300 MHz,  $\text{CDCl}_3$ )  $\delta$  7.21–7.09 (m, 2H), 7.08–6.94 (m, 3H), 6.87–6.75 (m, 2H), 3.08–2.95 (m, 2H), 2.76–2.65 (m, 2H), 1.93–1.76 (m, 1H), 1.73–1.56 (m, 4H).  $^{13}\text{C}$  NMR (75 MHz,  $\text{CDCl}_3$ )  $\delta$  161.4 (d,  $J = 243.8$  Hz), 160.8 (d,  $J = 242.8$  Hz), 142.1 (d,  $J = 6.5$  Hz), 136.1 (d,  $J = 3.3$  Hz), 132.5 (d,  $J = 2.9$  Hz), 130.49 (d,  $J = 7.7$  Hz), 130.3, 115.1 (d,  $J = 21.1$  Hz), 114.8 (d,  $J = 21.1$  Hz), 112.9 (d,  $J = 21.1$  Hz), 42.29, 39.7, 29.0, 26.3, 19.3. IR (KBr): 3041, 2925, 2869, 1602, 1511, 1459, 1153, 1128, 813, 730  $\text{cm}^{-1}$ . MS-EI: 258. HRMS (EI) calcd. for  $\text{C}_{17}\text{H}_{16}\text{F}_2^+$  [ $\text{M}^+$ ]: 258.1220, found 258.1225.

4-Fluoro-1-(2-fluorophenethyl)-2,3-dihydro-1*H*-indene **5j**

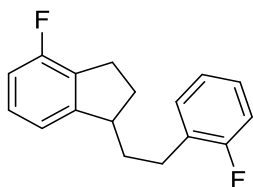

2,2'-(3-Fluoropentane-1,5-diyl)bis(fluorobenzene) **4j** (27.8 mg, 0.1 mmol) was added to a solution of tris(pentafluorophenyl)borane (1.0 mg, 2 mol%) in dry (CF<sub>3</sub>)<sub>2</sub>CHOH (2.0 ml). And the resulting mixture was stirred at 50 °C for 5 h under argon atmosphere. The purification by column chromatography on silica gel (*n*-hexane) to give **5j** (17.6 mg, 68%) as a colorless oil. <sup>1</sup>H NMR (300 MHz, CDCl<sub>3</sub>) δ 7.21–7.11 (m, 2H), 7.10–6.99 (m, 4H), 6.85 (t, *J* = 8.6 Hz, 1H), 3.17–3.04 (m, 2H), 2.91–2.75 (m, 2H), 2.65–2.56 (m, 1H), 1.95–1.83 (m, 1H), 1.82–1.74 (m, 1H), 1.63–1.54 (m, 2H). <sup>13</sup>C NMR (75 MHz, CDCl<sub>3</sub>) δ 161.4 (d, *J* = 244.8 Hz), 160.7 (d, *J* = 243.3 Hz), 142.8 (d, *J* = 4.7 Hz), 131.5 (d, *J* = 5.1 Hz), 127.8 (d, *J* = 8.1 Hz), 127.5 (d, *J* = 16.0 Hz), 126.1 (d, *J* = 8.9 Hz), 124.6, 124.3 (d, *J* = 3.1 Hz), 123.83 (d, *J* = 3.5 Hz), 115.3 (d, *J* = 22.4 Hz), 111.9 (d, *J* = 22.1 Hz), 38.0, 36.3, 25.8, 22.06 (d, *J* = 4.3 Hz), 17.8. IR (KBr): 3031, 2933, 2857, 1579, 1498, 1457, 1234, 879, 773, 755 cm<sup>-1</sup>. HRMS (EI) calcd. for C<sub>17</sub>H<sub>16</sub>F<sub>2</sub><sup>+</sup> [*M*<sup>+</sup>]: 258.1220, found 258.1225.

1-(2,4-Dimethylphenethyl)-4,6-dimethyl-2,3-dihydro-1*H*-indene **5k**

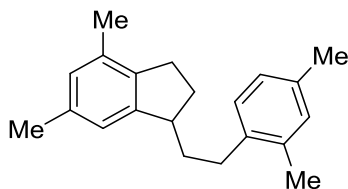

4,4'-(3-Fluoropentane-1,5-diyl)bis(1,3-dimethylbenzene) **4k** (29.8 mg, 0.1 mmol) was added to a solution of tris(pentafluorophenyl)borane (1.0 mg, 2 mol%) in dry (CF<sub>3</sub>)<sub>2</sub>CHOH (2.0 ml). And the resulting mixture was stirred at 50 °C for 5 h under argon atmosphere. The purification by column chromatography on silica gel (*n*-hexane) to give **5j** (14.1 mg, 50%) as a colorless oil. <sup>1</sup>H NMR (300 MHz, CDCl<sub>3</sub>) δ 7.06 (d, *J* = 7.6 Hz, 1H), 7.01 (s, 1H), 6.98 (d, *J* = 7.6 Hz, 1H), 6.90 (s, 1H), 6.87 (s, 1H), 3.08–2.95 (m, 2H), 2.73–2.65 (m, 2H), 2.57–2.45 (m, 1H), 2.36 (s, 3H), 2.32 (s, 3H), 2.29 (s, 3H), 2.21 (s, 3H), 2.03–1.87 (m, 1H), 1.85–1.71 (m, 1H), 1.70–1.57 (m, 2H). <sup>13</sup>C NMR (126 MHz, CDCl<sub>3</sub>) δ 140.7, 136.3, 136.2, 136.1, 135.5, 134.4, 132.3, 131.1, 130.1, 128.2, 127.1, 126.2, 40.1, 38.3, 26.6, 25.5, 20.96, 20.93, 19.68, 19.63, 18.9. IR (KBr): 3004, 2925, 2861, 1612, 1500, 1452, 1027, 852, 813 cm<sup>-1</sup>. MS-EI: 278. HRMS (EI) calcd. for C<sub>21</sub>H<sub>26</sub><sup>+</sup> [*M*<sup>+</sup>]: 278.2035, found 278.2041.

1-(3,4-Dimethylphenethyl)-4,5-dimethyl-2,3-dihydro-1*H*-indene **5i**

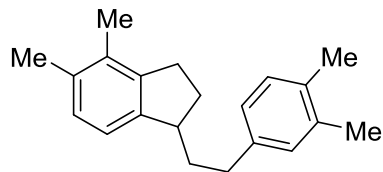

3,3'-(3-Fluoropentane-1,5-diyl)bis(1,2-dimethylbenzene) **4i** (29.8 mg, 0.1 mmol) was added to a solution of tris(pentafluorophenyl)borane (1.0 mg, 2 mol%) in dry (CF<sub>3</sub>)<sub>2</sub>CHOH (2.0 ml). And the resulting mixture was stirred at 50 °C for 5 h under argon atmosphere. The purification by column chromatography on silica gel (*n*-hexane) to give **5j** (25.2 mg, 67%) as a white solid, mp = 97-98 °C. <sup>1</sup>H NMR (300 MHz, CDCl<sub>3</sub>) δ 7.08–7.02 (m, 3H), 7.02–6.96 (m, 2H), 3.13 (dd, *J* = 13.5, 4.2 Hz, 1H), 3.02 (dd, *J* = 10.3, 4.8 Hz, 1H), 2.80–2.72 (m, 2H), 2.66–2.50 (m, 1H), 2.31 (s, 6H), 2.28 (s, 3H), 2.15 (s, 3H), 2.01–1.89 (m, 1H), 1.86–1.72 (m, 1H), 1.67–1.55 (m, 2H). <sup>13</sup>C NMR (126 MHz, CDCl<sub>3</sub>) δ 139.1, 138.6, 136.9, 135.2, 134.8, 134.7, 133.7, 128.3, 127.7, 127.1, 126.1, 125.0, 41.2, 38.4, 27.5, 25.4, 20.8, 20.5, 19.1, 15.3, 15.1. IR (KBr): 3016, 2937, 2861, 1590, 1471, 1378, 777, 725 cm<sup>-1</sup>. HRMS (EI) calcd. for C<sub>21</sub>H<sub>26</sub><sup>+</sup> [*M*<sup>+</sup>]: 278.2035, found 278.2059.

1-(2-(Naphthalen-2-yl)ethyl)-2,3-dihydro-1*H*-cyclopenta[*b*]naphthalene **5m**

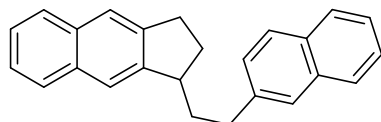

2,2'-(3-Fluoropentane-1,5-diyl)dinaphthalene **4m** (34.2 mg, 0.1 mmol) was added to a solution of tris(pentafluorophenyl)borane (1.0 mg, 2 mol%) in dry (CF<sub>3</sub>)<sub>2</sub>CHOH (2.0 ml). And the resulting mixture was stirred at 50 °C for 5 h under argon atmosphere. The purification by column chromatography on silica gel (*n*-hexane) to give **5m** (25.7 mg, 79%) as a sticky semi-solid. <sup>1</sup>H NMR (300 MHz, CDCl<sub>3</sub>) δ 8.31 (d, *J* = 8.5 Hz, 1H), 7.94–7.80 (m, 4H), 7.77 (s, 1H), 7.70–7.61 (m, 1H), 7.61–7.53 (m, 2H), 7.52–7.40 (m, 3H), 7.28–7.20 (m, 1H), 3.91 (d, *J* = 11.5 Hz, 1H), 3.41 (d, *J* = 14.2 Hz, 1H), 3.09–2.87 (m, 3H), 2.24–2.06 (m, 1H), 2.02–1.78 (m, 2H), 1.75–1.58 (m, 1H). <sup>13</sup>C NMR (126 MHz, CDCl<sub>3</sub>) δ 138.7, 135.2, 133.9, 133.5, 132.6, 132.0, 131.6, 128.9, 128.3, 128.0, 127.6, 127.5, 127.4, 127.2, 126.3, 126.0, 125.9, 125.2, 124.6, 122.7, 40.5, 35.0, 30.1, 24.4, 17.3. IR (KBr): 3052, 3012, 2925, 2865, 1673, 1600, 1513, 1450, 1373, 1268, 850, 738 cm<sup>-1</sup>. HRMS (EI) calcd. for C<sub>25</sub>H<sub>22</sub><sup>+</sup> [*M*<sup>+</sup>]: 322.1722, found 322.1718.

1-Benzyl-2,3-dihydro-1*H*-indene **5n** (Adamczyk et al., 1984)

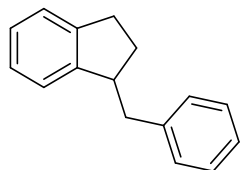

(2-Fluorobutane-1,4-diyl)dibenzene **4n** (22.8 mg, 0.1 mmol) was added to a solution of tris(pentafluorophenyl)borane (1.0 mg, 2 mol%) in dry (CF<sub>3</sub>)<sub>2</sub>CHOH (2.0 ml). And the resulting mixture was

stirred at 50 °C for 2 h under argon atmosphere. The purification by column chromatography on silica gel (*n*-hexane) to give **5m** (20.0 mg, 91%) as a colorless oil. <sup>1</sup>H NMR (300 MHz, CDCl<sub>3</sub>) δ 7.36–7.24 (m, 5H), 7.22–7.10 (m, 4H), 3.14–2.81 (m, 5H), 2.19–2.08 (m, 1H), 2.03–1.82 (m, 1H); <sup>13</sup>C NMR (126 MHz, CDCl<sub>3</sub>) δ 146.6, 136.6, 136.2, 129.0, 128.9, 128.4, 126.8, 126.1, 125.7, 125.6, 40.7, 37.7, 30.3, 29.7. MS (EI, *m/z*) 208 [M]<sup>+</sup>

1-Butyl-2,3-dihydro-1*H*-indene **5o** (Adamczyk et al., 1984)

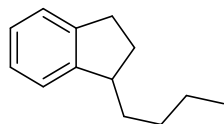

(3-Fluoroheptyl)benzene **4o** (19.4 mg, 0.1 mmol) was added to a solution of tris(pentafluorophenyl)borane (1.0 mg, 2 mol%) in dry (CF<sub>3</sub>)<sub>2</sub>CHOH (2.0 ml). And the resulting mixture was stirred at 50 °C for 5 h under argon atmosphere. The purification by column chromatography on silica gel (*n*-hexane) to give **5o** (10.9 mg, 62%) as a colorless oil. <sup>1</sup>H NMR (300 MHz, CDCl<sub>3</sub>) δ 7.24–7.05 (m, 4H), 2.87–2.68 (m, 3H), 1.97–1.80 (m, 2H), 1.75–1.61 (m, 3H), 1.58–1.28 (m, 3H), 0.95 (t, *J* = 7.6, 3H). MS (EI, *m/z*) 174 [M]<sup>+</sup>

1-Isopentyl-2,3-dihydro-1*H*-indene **5p**

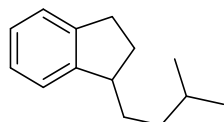

(3-Fluoro-6-methylheptyl)benzene **4p** (20.8 mg, 0.1 mmol) was added to a solution of tris(pentafluorophenyl)borane (1.0 mg, 2 mol%) in dry (CF<sub>3</sub>)<sub>2</sub>CHOH (2.0 ml). And the resulting mixture was stirred at 50 °C for 2 h under argon atmosphere. The purification by column chromatography on silica gel (*n*-hexane) to give **5p** (7.5 mg, 39%) as a colorless oil. <sup>1</sup>H NMR (300 MHz, CDCl<sub>3</sub>) δ 7.18–7.07 (m, 2H), 7.07–6.95 (m, 2H), 2.91–2.68 (m, 3H), 1.92–1.63 (m, 5H), 1.58–1.37 (m, 2H), 0.97 (d, *J* = 6.5 Hz, 3H), 0.94 (d, *J* = 6.6 Hz, 3H); <sup>13</sup>C NMR (126 MHz, CDCl<sub>3</sub>) δ 142.1, 136.9, 129.1, 128.6, 125.4, 125.3, 46.8, 35.1, 29.7, 27.1, 25.4, 23.9, 21.5, 19.3; IR (KBr): 3006, 2937, 2869, 1725, 1573, 1490, 1454, 1365, 748 cm<sup>-1</sup>. MS (EI, *m/z*) 188 [M]<sup>+</sup>. HRMS (EI) calcd. for C<sub>14</sub>H<sub>20</sub><sup>+</sup> [M]<sup>+</sup>: 188.1565 found 188.1564.

1-Phenyl-2,3-dihydro-1*H*-indene **5q** (Léonard and Chirik, 2018)

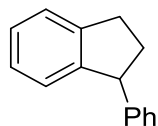

(1-Fluoropropane-1,3-diyl)dibenzene **4q** (21.4 mg, 0.1 mmol) was added to a solution of tris(pentafluorophenyl)borane (1.0 mg, 2 mol%) in dry (CF<sub>3</sub>)<sub>2</sub>CHOH (2.0 ml). And the resulting mixture was stirred at 50 °C for 2 h under argon atmosphere. The purification by column chromatography on silica gel (*n*-hexane) to give **5q** (5.7 mg, 29%) as a colorless oil. Under the same condition in the absence of tris(pentafluorophenyl)borane, the desired **5q** was isolated in 46% yield (9.1 mg). <sup>1</sup>H NMR (300 MHz, CDCl<sub>3</sub>) δ 7.33–7.16 (m, 8H), 6.96 (d, *J* = 7.3 Hz, 1H), 4.35 (t, *J* = 8.3 Hz, 1H), 3.05–2.97 (m, 2H), 2.66–2.56 (m,

1H), 2.15–1.99 (m, 1H); MS (EI,  $m/z$ ) 194 [M]<sup>+</sup>

1-Ethyl-1,2,3,4-tetrahydronaphthalene **5r** (Michelet et al., 2014)

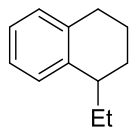

(4-Fluorohexyl)benzene **4r** (18.0 mg, 0.1 mmol) was added to a solution of tris(pentafluorophenyl)borane (1.0 mg, 2 mol%) in dry (CF<sub>3</sub>)<sub>2</sub>CHOH (2.0 ml). And the resulting mixture was stirred at 50 °C for 2 h under argon atmosphere. The purification by column chromatography on silica gel (*n*-hexane) to give **5q** (13.4 mg, 82%) as a colorless oil. <sup>1</sup>H NMR (300 MHz, CDCl<sub>3</sub>) δ 7.25–7.04 (m, 4H), 2.81–2.62 (m, 3H), 1.95–1.67 (m, 4H), 1.65–1.49 (m, 2H), 0.98 (t, *J* = 7.4 Hz, 3H); MS (EI,  $m/z$ ) 160 [M]<sup>+</sup>

1-Butyl-1,2,3,4-tetrahydronaphthalene **5s** (Adamczyk, et al., 1984)

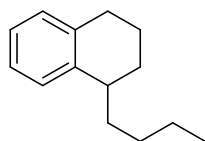

(4-Fluorooctyl)benzene **4s** (20.8 mg, 0.1 mmol) was added to a solution of tris(pentafluorophenyl)borane (1.0 mg, 2 mol%) in dry (CF<sub>3</sub>)<sub>2</sub>CHOH (2.0 ml). And the resulting mixture was stirred at 50 °C for 2 h under argon atmosphere. The purification by column chromatography on silica gel (*n*-hexane) to give **5s** (16.1 mg, 85%) as a colorless oil. <sup>1</sup>H NMR (300 MHz, CDCl<sub>3</sub>) δ 7.20–7.05 (m, 4H), 2.80–2.66 (m, 3H), 1.90–1.78 (m, 2H), 1.73–1.63 (m, 3H), 1.62–1.49 (m, 1H), 1.44–1.25 (m, 4H), 0.93 (t, *J* = 6.9 Hz, 3H); MS (EI,  $m/z$ ) 188 [M]<sup>+</sup>

### Synthesis of unknown *gem*-difluorides **1b-1u**, **1cc**, **1ee** and **1hh**, related to Figure 2.

For the preparation of substrates **1b-1u**, to a solution of corresponding ketone (1.0 mmol) in dry 1,2-dichloroethane at room temperature, was slowly added (diethylamino)sulfur trifluoride (DAST, 2.5 mmol). The resulting mixture was stirred at 60 °C, monitored by TLC and upon the completion of the reaction at the same temperature. After cooling to room temperature, the mixture was diluted with CH<sub>2</sub>Cl<sub>2</sub>, and then washed with water and brine. After drying over Na<sub>2</sub>SO<sub>4</sub>, the solvent was removed under reduced pressure, and the residue was subject to chromatography on silica gel (hexane/ CH<sub>2</sub>Cl<sub>2</sub>) to afford desired **1b-1u** in 28% to 57% yields, as shown in the following.

4,4'-(3,3-Difluoropentane-1,5-diyl)bis(methylbenzene) **1b**

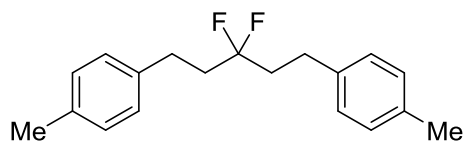

White solid, mp = 64–65 °C, 33% yield. <sup>1</sup>H NMR (300 MHz, CDCl<sub>3</sub>) δ 7.20–6.84 (m, 8H), 2.84–2.68 (m, 4H),

2.32 (s, 6H), 2.23–2.04 (m, 4H).  $^{13}\text{C}$  NMR (126 MHz,  $\text{CDCl}_3$ )  $\delta$  137.5, 135.7, 129.2, 128.2, 124.2 (t,  $J = 241.3$  Hz), 38.6 (t,  $J = 25.2$  Hz), 28.1 (t,  $J = 5.0$  Hz), 21.1.  $^{19}\text{F}$  NMR (282 MHz,  $\text{CDCl}_3$ )  $\delta$  -99.18 (quintet,  $J = 16.4$  Hz, 2F). IR (KBr): 3016, 2937, 2877, 1523, 1434, 1378, 1184, 1052, 908, 815, 742  $\text{cm}^{-1}$ . HRMS (EI) calcd. for  $\text{C}_{19}\text{H}_{22}\text{F}_2^+$  [ $\text{M}^+$ ] 288.1690, found 288.1688.

4,4'-(3,3-Difluoropentane-1,5-diyl)bis(methoxybenzene) **1c**

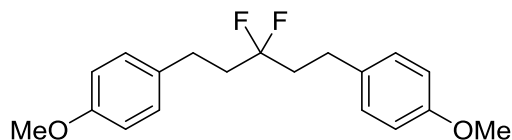

White solid, mp = 54–55  $^{\circ}\text{C}$ , 28% yield.  $^1\text{H}$  NMR (300 MHz,  $\text{CDCl}_3$ )  $\delta$  7.10 (d,  $J = 8.5$  Hz, 4H), 6.84 (d,  $J = 8.6$  Hz, 4H), 3.79 (s, 6H), 2.82–2.72 (m, 4H), 2.17–1.98 (m, 4H).  $^{13}\text{C}$  NMR (126 MHz,  $\text{CDCl}_3$ )  $\delta$  157.9, 132.6, 129.1, 124.2 (t,  $J = 241.3$  Hz), 113.9, 55.2, 38.6 (t,  $J = 25.2$  Hz), 27.6 (t,  $J = 5.0$  Hz).  $^{19}\text{F}$  NMR (282 MHz,  $\text{CDCl}_3$ )  $\delta$  -99.16 (quintet,  $J = 16.5$  Hz, 2F). IR (KBr): 3008, 2937, 2877, 1523, 1434, 1378, 1184, 1052, 908, 815, 742  $\text{cm}^{-1}$ . HRMS (EI) calcd. for  $\text{C}_{19}\text{H}_{22}\text{F}_2\text{O}_2^+$  [ $\text{M}^+$ ] 320.1588, found 320.1587.

4,4'-(3,3-Difluoropentane-1,5-diyl)bis(ethylbenzene) **1d**

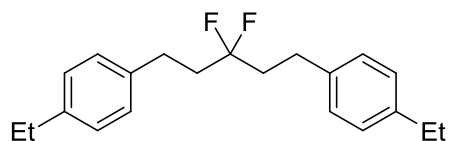

White solid, mp = 35–36  $^{\circ}\text{C}$ , 33% yield.  $^1\text{H}$  NMR (300 MHz,  $\text{CDCl}_3$ )  $\delta$  7.18–6.97 (m, 8H), 2.80–2.71 (m, 4H), 2.62 (q,  $J = 7.6$  Hz, 4H), 2.29–2.12 (m, 4H), 1.22 (t,  $J = 7.6$  Hz, 6H).  $^{13}\text{C}$  NMR (126 MHz,  $\text{CDCl}_3$ )  $\delta$  142.1, 137.8, 128.2, 128.0, 124.2 (t,  $J = 241.3$  Hz), 38.5 (t,  $J = 25.3$  Hz), 28.4, 28.11 (t,  $J = 4.9$  Hz), 15.6.  $^{19}\text{F}$  NMR (282 MHz,  $\text{CDCl}_3$ )  $\delta$  -99.09 (quintet,  $J = 16.4$  Hz, 2F). IR (KBr): 3008, 2960, 2929, 2837, 1515, 1457, 1375, 1299, 1189, 1151, 1172, 813  $\text{cm}^{-1}$ . HRMS (EI) calcd. for  $\text{C}_{21}\text{H}_{26}\text{F}_2^+$  [ $\text{M}^+$ ] 316.2003, found 316.2000.

4,4'-(3,3-Difluoropentane-1,5-diyl)bis(butylbenzene) **1e**

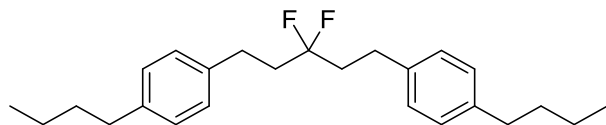

White solid, mp = 30–31  $^{\circ}\text{C}$ , 36% yield.  $^1\text{H}$  NMR (300 MHz,  $\text{CDCl}_3$ )  $\delta$  7.25–7.06 (m, 8H), 2.80–2.69 (m, 4H), 2.62–2.46 (m, 4H), 2.26–2.07 (m, 4H), 1.67–1.53 (m, 4H), 1.35 (dq,  $J = 14.5, 7.3$  Hz, 4H), 0.92 (t,  $J = 7.3$  Hz, 6H).  $^{13}\text{C}$  NMR (126 MHz,  $\text{CDCl}_3$ )  $\delta$  140.8, 137.7, 128.5, 128.1, 124.27 (t,  $J = 241.3$  Hz), 38.49 (t,  $J = 25.2$  Hz), 35.2, 33.7, 28.11 (t,  $J = 4.6$  Hz), 22.3, 13.9.  $^{19}\text{F}$  NMR (282 MHz,  $\text{CDCl}_3$ )  $\delta$  -99.07 (quintet,  $J = 16.4$  Hz, 2F). IR (KBr): 3012, 2956, 2861, 1517, 1455, 1375, 1199, 1153, 1056, 813  $\text{cm}^{-1}$ . HRMS (EI) calcd. for  $\text{C}_{25}\text{H}_{34}\text{F}_2^+$  [ $\text{M}^+$ ] 372.2629, found 372.2625.



2,2'-(3,3-Difluoropentane-1,5-diyl)bis(methylbenzene) **1f**

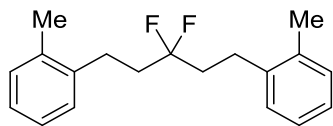

White solid, mp = 52–53 °C, 32% yield. <sup>1</sup>H NMR (300 MHz, CDCl<sub>3</sub>) δ 7.24–7.09 (m, 8H), 2.87–2.77 (m, 4H), 2.33 (s, 6H), 2.23–2.04 (m, 4H). <sup>13</sup>C NMR (126 MHz, CDCl<sub>3</sub>) δ 138.7, 135.9, 130.3, 128.7, 126.4, 126.2, 124.2 (t, *J* = 241.5 Hz), 37.2 (t, *J* = 25.3 Hz), 25.8 (t, *J* = 5.0 Hz), 19.1. <sup>19</sup>F NMR (282 MHz, CDCl<sub>3</sub>) δ -99.98 (quintet, *J* = 16.4 Hz, 2F). IR(KBr): 3019, 2937, 2869, 1494, 1461, 1380, 1299, 1199, 1157, 1064, 750 cm<sup>-1</sup>. HRMS (EI) calcd. for C<sub>19</sub>H<sub>22</sub>F<sub>2</sub><sup>+</sup> [M<sup>+</sup>] 288.1690, found 288.1692.

2,2'-(3,3-Difluoropentane-1,5-diyl)bis(methoxybenzene) **1g**

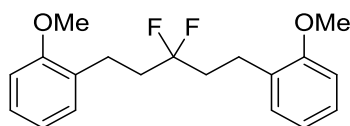

White solid, mp = 89–90 °C, 45% yield. <sup>1</sup>H NMR (300 MHz, CDCl<sub>3</sub>) δ 7.25–7.13 (m, 4H), 6.88 (dd, *J* = 15.3, 7.8 Hz, 4H), 3.83 (d, *J* = 0.8 Hz, 6H), 2.87–2.75 (m, 4H), 2.22–2.11 (m, 4H). <sup>13</sup>C NMR (126 MHz, CDCl<sub>3</sub>) δ 157.4, 129.7, 129.1, 127.4, 125.1 (t, *J* = 241.0 Hz), 120.4, 110.1, 55.1, 36.2 (t, *J* = 25.2 Hz), 23.7 (t, *J* = 5.4 Hz). <sup>19</sup>F NMR (282 MHz, CDCl<sub>3</sub>) δ -98.23 (quintet, *J* = 16.4 Hz, 2F). IR (KBr): 3019, 2960, 2940, 2844, 1598, 1492, 1457, 1448, 1367, 1243, 1151, 1108, 1052, 1022, 844 cm<sup>-1</sup>. HRMS (EI) calcd. for C<sub>19</sub>H<sub>22</sub>F<sub>2</sub>O<sub>2</sub><sup>+</sup> [M<sup>+</sup>] 320.1588, found 320.1587.

3,3'-(3,3-Difluoropentane-1,5-diyl)bis(methylbenzene) **1h**

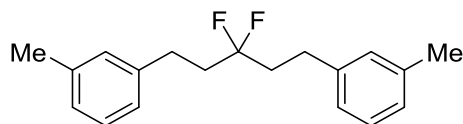

White solid, mp = 44–45 °C, 30% yield. <sup>1</sup>H NMR (300 MHz, CDCl<sub>3</sub>) δ 7.23–7.12 (m, 2H), 7.09–6.94 (m, 6H), 2.85–2.73 (m, 4H), 2.33 (s, 6H), 2.28–2.07 (m, 4H). <sup>13</sup>C NMR (126 MHz, CDCl<sub>3</sub>) δ 140.5, 138.1, 129.1, 128.4, 126.9, 125.2, 124.21 (t, *J* = 241.3 Hz), 38.49 (t, *J* = 25.3 Hz), 28.45 (t, *J* = 5.1 Hz), 21.3. <sup>19</sup>F NMR (282 MHz, CDCl<sub>3</sub>) δ -99.24 (quintet, *J* = 16.3 Hz, 2F). IR(KBr): 3035, 2956, 2929, 1610, 1448, 1378, 1301, 1203, 1151, 1070, 779 cm<sup>-1</sup>. HRMS (EI) calcd. for C<sub>19</sub>H<sub>22</sub>F<sub>2</sub><sup>+</sup> [M<sup>+</sup>] 288.1690, found 288.1695.

2,2'-(3,3-Difluoropentane-1,5-diyl)bis(fluorobenzene) **1i**

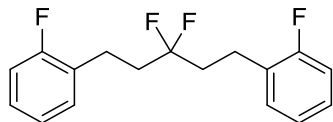

Colorless oil, 55% yield. <sup>1</sup>H NMR (300 MHz, CDCl<sub>3</sub>) δ 7.25–7.14 (m, 4H), 7.12–6.99 (m, 4H), 2.92–2.79 (m, 4H), 2.28–2.12 (m, 4H). <sup>13</sup>C NMR (126 MHz, CDCl<sub>3</sub>) δ 161.1 (d, *J* = 245.1 Hz), 130.5 (d, *J* = 4.9 Hz), 128.1 (d, *J* = 8.1 Hz), 127.4 (d, *J* = 15.6 Hz), 124.1 (d, *J* = 3.6 Hz), 124.0 (t, *J* = 241.6 Hz), 115.3 (d, *J* = 21.9 Hz), 36.8 (t, *J* = 25.2 Hz), 22.2 (td, *J* = 5.4, 2.8 Hz). <sup>19</sup>F NMR (282 MHz, CDCl<sub>3</sub>) δ -99.87 (quintet, *J* = 16.4 Hz,

2F), -117.30–119.91 (m, 2F). IR (KBr): 3052, 2937, 2869, 1589, 1494, 1454, 1228, 1195, 1060, 752  $\text{cm}^{-1}$ . HRMS (EI) calcd. for  $\text{C}_{17}\text{H}_{16}\text{F}_4^+$  [ $\text{M}^+$ ] 296.1188, found 296.1194.

2,2'-(3,3-Difluoropentane-1,5-diyl)bis(bromobenzene) **1j**

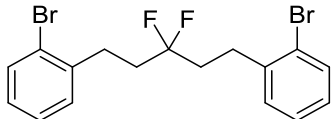

White solid, mp = 58–59 °C, 50% yield.  $^1\text{H}$  NMR (300 MHz,  $\text{CDCl}_3$ )  $\delta$  7.54 (d,  $J$  = 7.9 Hz, 2H), 7.25 (d,  $J$  = 4.0 Hz, 4H), 7.09 (dt,  $J$  = 8.9, 4.4 Hz, 2H), 3.06–2.92 (m, 4H), 2.27–2.13 (m, 4H).  $^{13}\text{C}$  NMR (126 MHz,  $\text{CDCl}_3$ )  $\delta$  139.8, 132.9, 130.4, 128.0, 127.7, 124.2, 124.0 (t,  $J$  = 241.9 Hz), 36.5 (t,  $J$  = 25.3 Hz), 29.2 (t,  $J$  = 5.3 Hz).  $^{19}\text{F}$  NMR (282 MHz,  $\text{CDCl}_3$ )  $\delta$  -99.18 (quintet,  $J$  = 16.3 Hz, 2F). IR(KBr): 3060, 2933, 1565, 1475, 1438, 1297, 1211, 1155, 1025, 744  $\text{cm}^{-1}$ . HRMS (EI) calcd. for  $\text{C}_{17}\text{H}_{16}\text{Br}_2\text{F}_2^+$  [ $\text{M}^+$ ] 415.9587, found 415.9598.

2,2'-(3,3-Difluoropentane-1,5-diyl)bis(chlorobenzene) **1k**

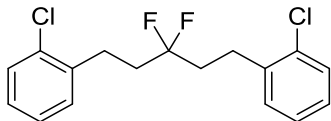

Colorless oil, 56% yield.  $^1\text{H}$  NMR (300 MHz,  $\text{CDCl}_3$ )  $\delta$  7.36 (dd,  $J$  = 7.3, 1.6 Hz, 2H), 7.34–7.13 (m, 6H), 3.02–2.93 (m, 4H), 2.28–2.08 (m, 4H).  $^{13}\text{C}$  NMR (126 MHz,  $\text{CDCl}_3$ )  $\delta$  138.1, 133.8, 130.4, 129.6, 127.8, 127.0, 124.1 (t,  $J$  = 241.8 Hz), 36.3 (t,  $J$  = 25.4 Hz), 26.7 (t,  $J$  = 5.3 Hz).  $^{19}\text{F}$  NMR (282 MHz,  $\text{CDCl}_3$ )  $\delta$  -99.35 (quintet,  $J$  = 16.3 Hz, 2F). IR(KBr): 3072, 2933, 2869, 1592, 1569, 1477, 1299, 1199, 1126, 1157, 1024, 759  $\text{cm}^{-1}$ . HRMS (EI) calcd. for  $\text{C}_{17}\text{H}_{16}\text{Cl}_2\text{F}_2^+$  [ $\text{M}^+$ ] 328.0597, found 328.0604.

4,4'-(3,3-Difluoropentane-1,5-diyl)bis(bromobenzene) **1l**

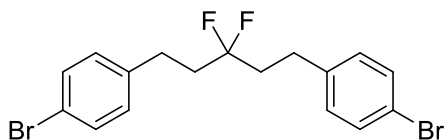

Yellow Solid, mp = 74–76 °C, 26% yield.  $^1\text{H}$  NMR (300 MHz,  $\text{CDCl}_3$ )  $\delta$  7.42 (d,  $J$  = 8.3 Hz, 4H), 7.06 (d,  $J$  = 8.3 Hz, 4H), 2.83–2.64 (m, 4H), 2.27–2.03 (m, 4H).  $^{13}\text{C}$  NMR (75 MHz,  $\text{CDCl}_3$ )  $\delta$  139.4, 131.6, 130.0, 123.7 (t,  $J$  = 241.7 Hz), 120.0, 38.3 (t,  $J$  = 25.3 Hz), 27.8 (t,  $J$  = 5.1 Hz).  $^{19}\text{F}$  NMR (282 MHz,  $\text{CDCl}_3$ )  $\delta$  -99.70 (quintet,  $J$  = 16.1 Hz, 2F). IR(KBr): 3025, 2971, 2925, 2867, 1492, 1455, 1402, 1267, 1193, 1068, 1010, 844, 736  $\text{cm}^{-1}$ . HRMS (EI) calcd. for  $\text{C}_{17}\text{H}_{16}\text{Br}_2\text{F}_2^+$  [ $\text{M}^+$ ] 415.9587, found 415.9583.

4,4'-(3,3-Difluoropentane-1,5-diyl)bis(chlorobenzene) **1m**

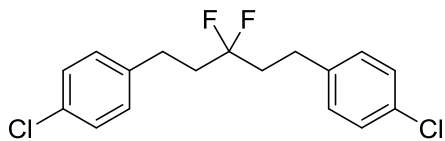

Yellow Solid, mp = 54–55 °C, 41% yield. <sup>1</sup>H NMR (300 MHz, CDCl<sub>3</sub>) δ 7.26 (d, *J* = 8.4 Hz, 4H), 7.10 (d, *J* = 8.3 Hz, 4H), 2.86–2.72 (m, 4H), 2.24–1.99 (m, 4H). <sup>13</sup>C NMR (126 MHz, CDCl<sub>3</sub>) δ 138.9, 132.0, 129.6, 128.6, 123.7 (t, *J* = 241.7 Hz), 38.38 (t, *J* = 25.3 Hz), 27.81 (t, *J* = 5.0 Hz). <sup>19</sup>F NMR (282 MHz, CDCl<sub>3</sub>) δ -99.66 (quintet, *J* = 16.4 Hz, 2F). IR (KBr): 3027, 2937, 2889, 1490, 1455, 1407, 1384, 1159, 1095, 1014, 815, 757 cm<sup>-1</sup>. HRMS (EI) calcd. for C<sub>17</sub>H<sub>16</sub>Cl<sub>2</sub>F<sub>2</sub><sup>+</sup> [M<sup>+</sup>] 328.0597, found 328.0606.

4,4'-(3,3-Difluoropentane-1,5-diyl)bis(1,3-dimethylbenzene) **1n**

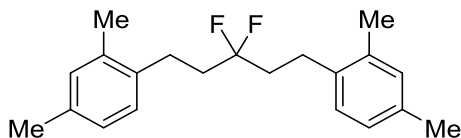

White Solid, mp = 66–68 °C, 29% yield. <sup>1</sup>H NMR (300 MHz, CDCl<sub>3</sub>) δ 7.08–6.92 (m, 6H), 2.87–2.72 (m, 4H), 2.29 (s, 12H), 2.19–1.98 (m, 4H). <sup>13</sup>C NMR (126 MHz, CDCl<sub>3</sub>) δ 135.9, 135.7, 135.6, 131.1, 128.6, 126.8, 124.3 (t, *J* = 241.4 Hz), 37.3 (t, *J* = 25.3 Hz), 25.4 (t, *J* = 5.0 Hz), 20.8, 19.1. <sup>19</sup>F NMR (282 MHz, CDCl<sub>3</sub>) δ -99.82 (quintet, *J* = 16.5 Hz, 2F). IR(KBr): 3002, 2948, 2879, 1614, 1502, 1461, 1376, 1270, 1189, 1047, 840, 761 cm<sup>-1</sup>. HRMS (EI) calcd. for C<sub>21</sub>H<sub>26</sub>F<sub>2</sub><sup>+</sup> [M<sup>+</sup>] 316.2003, found 316.2013.

3,3'-(3,3-Difluoropentane-1,5-diyl)bis(1,2-dimethylbenzene) **1o**

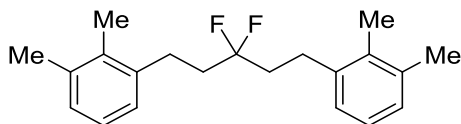

White Solid, mp = 76–77 °C, 41% yield. <sup>1</sup>H NMR (300 MHz, CDCl<sub>3</sub>) δ 7.12–6.98 (m, 6H), 2.87–2.75 (m, 4H), 2.28 (s, 6H), 2.22 (s, 6H), 2.24–2.04 (m, 4H). <sup>13</sup>C NMR (126 MHz, CDCl<sub>3</sub>) δ 138.6, 137.1, 134.4, 128.1, 126.8, 125.6, 124.29 (t, *J* = 241.4 Hz), 37.56 (t, *J* = 25.3 Hz), 26.65 (t, *J* = 4.9 Hz), 20.7, 14.9. <sup>19</sup>F NMR (282 MHz, CDCl<sub>3</sub>) δ -99.97 (quintet, *J* = 16.5 Hz, 2F).

IR(KBr): 3001, 2948, 2892, 1585, 1467, 1440, 1386, 1186, 1031, 823, 773 cm<sup>-1</sup>. HRMS (EI) calcd. for C<sub>21</sub>H<sub>26</sub>F<sub>2</sub><sup>+</sup> [M<sup>+</sup>] 316.2003, found 316.1998.

2,2'-(3,3-Difluoropentane-1,5-diyl)dinaphthalene

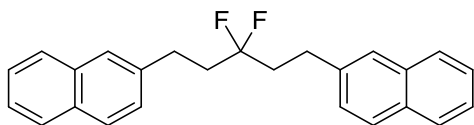

White Solid, mp = 110–112 °C, 48% yield. <sup>1</sup>H NMR (300 MHz, CDCl<sub>3</sub>) δ 7.82–7.70 (m, 6H), 7.60 (s, 2H), 7.52–7.39 (m, 4H), 7.32 (dd, *J* = 8.4, 1.5 Hz, 2H), 3.09–2.97 (m, 4H), 2.50–2.21 (m, 4H). <sup>13</sup>C NMR (126

MHz, CDCl<sub>3</sub>) δ 138.0, 133.5, 132.0, 128.1, 127.6, 127.4, 126.9, 126.4, 126.0, 125.4, 124.23 (t, *J* = 241.5 Hz), 38.37 (t, *J* = 25.3 Hz), 28.71 (t, *J* = 5.0 Hz). <sup>19</sup>F NMR (282 MHz, cdcl<sub>3</sub>) δ -98.91 (quintet, *J* = 16.2 Hz, 2F). IR (KBr): 2937, 1598, 1508, 1458, 1365, 1295, 1155, 1102, 1066, 817 cm<sup>-1</sup>. HRMS (EI) calcd. for C<sub>25</sub>H<sub>22</sub>F<sub>2</sub><sup>+</sup> [M<sup>+</sup>] 360.1690, found 360.1696.

#### 1-(3,3-Difluoro-5-phenylpentyl)-2,4-dimethylbenzene **1p**

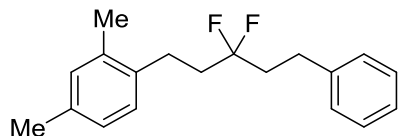

Colorless oil, 48% yield. <sup>1</sup>H NMR (300 MHz, CDCl<sub>3</sub>) δ 7.34–7.26 (m, 2H), 7.25–7.12 (m, 3H), 7.07–6.94 (m, 3H), 2.85–2.64 (m, 4H), 2.29 (s, 6H), 2.22–1.97 (m, 4H). <sup>13</sup>C NMR (126 MHz, CDCl<sub>3</sub>) δ 140.6, 135.9, 135.7, 135.6, 131.1, 128.6, 128.5, 128.2, 126.8, 126.2, 124.2 (t, *J* = 241.4 Hz), 38.4 (t, *J* = 25.3 Hz), 37.3 (t, *J* = 25.2 Hz), 28.5 (t, *J* = 5.0 Hz), 25.4 (t, *J* = 5.0 Hz), 20.8, 19.1. <sup>19</sup>F NMR (282 MHz, CDCl<sub>3</sub>) δ -99.53 (m, 2F). IR(KBr): 3027, 2944, 2869, 1504, 1450, 1382, 1305, 1199, 1159, 811 cm<sup>-1</sup>. HRMS (EI) calcd. for C<sub>19</sub>H<sub>22</sub>F<sub>2</sub><sup>+</sup> [M<sup>+</sup>] 288.1690, found 288.1697.

#### 1-Bromo-2-(3,3-difluoro-5-(o-tolyl)pentyl)benzene **1r**

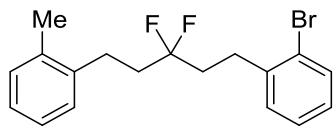

Yellow oil, 44% yield. <sup>1</sup>H NMR (300 MHz, CDCl<sub>3</sub>) δ 7.54 (d, *J* = 7.8 Hz, 1H), 7.29–7.22 (m, 2H), 7.21–7.07 (m, 5H), 3.04–2.90 (m, 2H), 2.90–2.76 (m, 2H), 2.33 (s, 3H), 2.28–2.00 (m, 4H). <sup>13</sup>C NMR (126 MHz, CDCl<sub>3</sub>) δ 139.8, 138.7, 135.9, 132.9, 130.4, 130.3, 128.6, 128.1, 127.7, 126.4, 126.2, 124.2, 124.1 (t, *J* = 241.6 Hz), 37.0 (t, *J* = 25.2 Hz), 36.6 (t, *J* = 25.4 Hz), 29.3 (t, *J* = 5.3 Hz), 25.8 (t, *J* = 5.1 Hz), 19.1. <sup>19</sup>F NMR (282 MHz, cdcl<sub>3</sub>) δ -99.51 (quintet, *J* = 16.3 Hz, 2F). HRMS (EI) calcd. for C<sub>18</sub>H<sub>19</sub>BrF<sub>2</sub><sup>+</sup> [M<sup>+</sup>] 352.0638, found 352.0639.

#### (4,4-Difluoroheptane-1,7-diyl)dibenzene **1s**

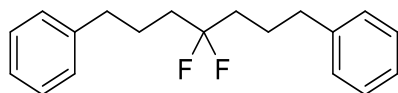

Yellow oil, 35% yield. <sup>1</sup>H NMR (300 MHz, CDCl<sub>3</sub>) δ 7.34–7.23 (m, 4H), 7.23–7.10 (m, 6H), 2.65–2.50 (m, 4H), 1.95–1.63 (m, 8H). <sup>13</sup>C NMR (126 MHz, CDCl<sub>3</sub>) δ 141.4, 128.3, 128.3, 125.9, 125.1 (t, *J* = 240.4 Hz), 35.7 (t, *J* = 25.5 Hz), 35.3, 23.9 (t, *J* = 4.5 Hz). <sup>19</sup>F NMR (282 MHz, CDCl<sub>3</sub>) δ -97.85 (m, 2F). IR(KBr): 3023, 2952, 2857, 1604, 1492, 1454, 1322, 1091, 752 cm<sup>-1</sup>. HRMS (EI) calcd. for C<sub>19</sub>H<sub>22</sub>F<sub>2</sub><sup>+</sup> [M<sup>+</sup>] 288.1690, found 288.1692.

(3,3-Difluorohexane-1,6-diyl)dibenzene **1t**

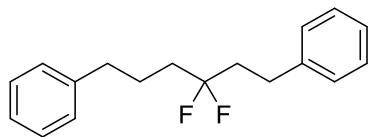

Colorless oil, 29% yield.  $^1\text{H}$  NMR (300 MHz,  $\text{CDCl}_3$ )  $\delta$  7.37–7.24 (m, 4H), 7.24–7.08 (m, 6H), 2.85–2.72 (m, 2H), 2.71–2.58 (m, 2H), 2.25–2.00 (m, 2H), 1.98–1.70 (m, 4H).  $^{13}\text{C}$  NMR (126 MHz,  $\text{CDCl}_3$ )  $\delta$  141.4, 140.6, 128.5, 128.4, 128.3, 128.2, 126.1, 125.9, 124.6 (t,  $J = 240.9$  Hz), 38.2 (t,  $J = 25.5$  Hz), 35.9 (t,  $J = 25.3$  Hz), 35.3, 28.41 (t,  $J = 5.0$  Hz), 24.05 (t,  $J = 4.5$  Hz).  $^{19}\text{F}$  NMR (282 MHz,  $\text{CDCl}_3$ )  $\delta$  -98.67 (quintet,  $J = 16.1$  Hz, 2F). IR(KBr): 3027, 2952, 2857, 1606, 1496, 1454, 1321, 1205, 1149, 746  $\text{cm}^{-1}$ . HRMS (EI) calcd. for  $\text{C}_{18}\text{H}_{20}\text{F}_2^+$  [ $\text{M}^+$ ] 274.1533, found 274.1539.

4,4'-(3,3-Difluoropentane-1,5-diyl)bis(fluorobenzene) **1u**

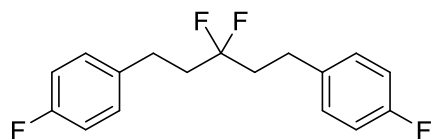

Colorless oil, 57% yield.  $^1\text{H}$  NMR (300 MHz,  $\text{CDCl}_3$ )  $\delta$  7.24–7.07 (m, 4H), 7.08–6.95 (m, 4H), 2.87–2.71 (m, 4H), 2.28–2.05 (m, 4H).  $^{13}\text{C}$  NMR (126 MHz,  $\text{CDCl}_3$ )  $\delta$  161.4 (d,  $J = 244.0$  Hz), 136.1 (d,  $J = 3.2$  Hz), 129.6 (d,  $J = 7.9$  Hz), 123.8 (t,  $J = 241.5$  Hz), 115.3 (d,  $J = 21.2$  Hz), 38.6 (t,  $J = 25.3$  Hz), 27.6 (t,  $J = 5.0$  Hz).  $^{19}\text{F}$  NMR (282 MHz,  $\text{CDCl}_3$ )  $\delta$  -99.66 (quintet,  $J = 16.4$  Hz, 2F), -116.94–117.21 (m, 1F). IR(KBr): 2877, 2929, 1608, 1517, 1454, 1311, 1228, 1157, 1054, 829  $\text{cm}^{-1}$ . HRMS (EI) calcd. for  $\text{C}_{17}\text{H}_{16}\text{F}_4^+$  [ $\text{M}^+$ ] 296.1188, found 296.1191.

(1,1-Difluoropentyl)benzene **1cc**

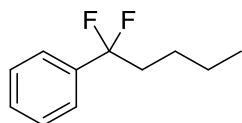

To a solution of 1-phenylpentan-1-one (1.0 mmol) in  $\text{CH}_2\text{Cl}_2$  (1.0 mL) at room temperature, was slowly added 4-*tert*-butyl-2,6-dimethylphenylsulfur trifluoride (Fluolead, 2.0 mmol) and hydrogen fluoride pyridine (around 70% HF, 0.4 equiv). (Umamoto et al., 2010) The resulting mixture was stirred for 36 hours and was diluted with  $\text{CH}_2\text{Cl}_2$ , and then washed with saturated  $\text{Na}_2\text{CO}_3$  aqueous solution and brine. After drying over  $\text{Na}_2\text{SO}_4$ , the solvent was removed under reduced pressure, and the residue was subject to chromatography on silica gel (hexane) to afford desired **3cc** in 80% yields, as a colorless liquid.  $^1\text{H}$  NMR (300 MHz,  $\text{CDCl}_3$ )  $\delta$  7.45–7.30 (m, 5H), 2.25–2.03 (m, 2H), 1.48–1.31 (m, 4H), 0.88 (t,  $J = 7.0$  Hz, 3H).  $^{13}\text{C}$  NMR (126 MHz,  $\text{CDCl}_3$ )  $\delta$  137.5 (t,  $J = 26.7$  Hz), 129.4 (d,  $J = 1.6$  Hz), 128.3, 124.9 (t,  $J = 6.3$  Hz), 123.1 (t,  $J = 241.9$  Hz), 38.8 (t,  $J = 27.4$  Hz), 24.5 (t,  $J = 4.0$  Hz), 22.3, 13.8.  $^{19}\text{F}$  NMR (282 MHz,  $\text{CDCl}_3$ )  $\delta$  -95.44 (t,  $J = 16.2$  Hz). HRMS (EI) calcd. for  $\text{C}_{11}\text{H}_{14}\text{F}_2^+$  [ $\text{M}^+$ ] 184.1064, found 184.1068.

### 1,1-Difluoro-4-pentylcyclohexane **1ee**

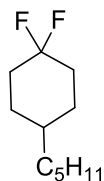

To a solution of 4-pentylcyclohexan-1-one (1.0 mmol) in dry  $\text{CH}_2\text{Cl}_2$  at  $-40\text{ }^\circ\text{C}$ , was slowly added DAST ((diethylamino)sulfur trifluoride, 2.0 mmol). The resulting mixture was slowly warmed to room temperature with 2-3 hours. And the reaction mixture was monitored by TLC and upon the completion of the reaction at the same temperature and was diluted with  $\text{CH}_2\text{Cl}_2$ , and then washed with water and brine. After drying over  $\text{Na}_2\text{SO}_4$ , the solvent was removed under reduced pressure, and the residue was subject to chromatography on silica gel (hexane/  $\text{CH}_2\text{Cl}_2$ ) to afford desired **3ee** in 72% yield, as a colorless liquid.  $^1\text{H}$  NMR (300 MHz,  $\text{CDCl}_3$ )  $\delta$  2.19–1.95 (m, 2H), 1.77–1.54 (m, 4H), 1.35–1.10 (m, 11H), 0.88 (t,  $J = 6.6$  Hz, 3H).  $^{13}\text{C}$  NMR (126 MHz,  $\text{CDCl}_3$ )  $\delta$  123.9 (dd,  $J = 241.5, 239.6$  Hz), 35.6 (d,  $J = 3.2$  Hz), 33.6 (d,  $J = 22.2$  Hz), 33.4 (d,  $J = 22.2$  Hz), 32.0, 28.9 (d,  $J = 9.5$  Hz), 26.8, 22.6, 14.1.  $^{19}\text{F}$  NMR (282 MHz,  $\text{CDCl}_3$ )  $\delta$  -91.32 (d,  $J = 233.2$  Hz, 1F), -101.18–102.71 (m, 1F). HRMS (EI) calcd. for  $\text{C}_{11}\text{H}_{20}\text{F}^+$   $[\text{M}-\text{F}]^+$  171.1544, found 171.1548.

### 1,1-Difluorocyclopentadecane **1hh**

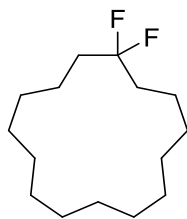

To a solution of cyclopentadecanone (1.0 mmol) in  $\text{CH}_2\text{Cl}_2$  (1.0 mL) at room temperature, was slowly added 4-*tert*-butyl-2,6-dimethylphenylsulfur trifluoride (Fluolead, 2.0 mmol) and hydrogen fluoride pyridine (around 70% HF, 0.4 equiv). (Umemoto et al., 2010) The resulting mixture was stirred for 48 hours and was diluted with  $\text{CH}_2\text{Cl}_2$ , and then washed with saturated  $\text{Na}_2\text{CO}_3$  aqueous solution and brine. After drying over  $\text{Na}_2\text{SO}_4$ , the solvent was removed under reduced pressure, and the residue was subject to chromatography on silica gel (hexane) to afford desired **3hh** in 66% yields, as a colorless semi-solid.  $^1\text{H}$  NMR (300 MHz,  $\text{CDCl}_3$ )  $\delta$  1.93–1.79 (m, 4H), 1.53–1.37 (m, 12H), 1.37–1.24 (m, 12H).  $^{13}\text{C}$  NMR (126 MHz,  $\text{CDCl}_3$ )  $\delta$  126.5 (t,  $J = 239.8$  Hz), 34.5 (t,  $J = 25.5$  Hz), 26.9, 26.7, 26.4, 26.3, 26.3, 21.3 (t,  $J = 5.5$  Hz).  $^{19}\text{F}$  NMR (282 MHz,  $\text{CDCl}_3$ )  $\delta$  -90.88 (quintet,  $J = 15.5$  Hz, 2F). IR(KBr): 2929, 2862, 1448, 1085, 1037  $\text{cm}^{-1}$ . HRMS (EI) calcd. for  $\text{C}_{15}\text{H}_{28}\text{F}^+$   $[\text{M}-\text{F}]^+$ , 227.2170 found 227.2179

### General procedure for preparation of aliphatic fluoride 4a-4s, related to Figure 3.

To a solution of aliphatic secondary alcohol (1.0 mmol) in dry  $\text{CH}_2\text{Cl}_2$  at  $-78\text{ }^\circ\text{C}$ , was slowly added (diethylamino)sulfur trifluoride (DAST, 1.3 mmol). The resulting mixture was slowly warmed to room temperature with 2-3 hours. And the reaction mixture was monitored by TLC and upon the completion of the reaction at the same temperature (around 2-3 hours) and was diluted with  $\text{CH}_2\text{Cl}_2$ , and then washed with water and brine. After drying over  $\text{Na}_2\text{SO}_4$ , the solvent was removed under reduced pressure, and the residue was subject to chromatography on silica gel (hexane/  $\text{CH}_2\text{Cl}_2$ ) to afford desired **4a-4s** in 41% to 90% yields as shown in the following.

#### (3-Fluoropentane-1,5-diyl)dibenzene **4a**

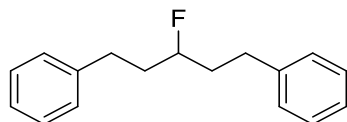

Colorless oil, 82% yield.  $^1\text{H}$  NMR (300 MHz,  $\text{CDCl}_3$ )  $\delta$  7.40–7.24 (m, 4H), 7.23–7.02 (m, 6H), 4.61–4.39 (m, 1H,  $^2J_{\text{H-F}} = 49.4$  Hz), 2.87–2.62 (m, 4H), 2.02–1.76 (m, 4H).  $^{13}\text{C}$  NMR (75 MHz,  $\text{CDCl}_3$ )  $\delta$  141.4, 128.4, 125.9, 92.7 (d,  $J = 168.2$  Hz), 37.0 (d,  $J = 20.9$  Hz), 31.4 (d,  $J = 4.3$  Hz).  $^{19}\text{F}$  NMR (282 MHz,  $\text{cdcl}_3$ )  $\delta$  -183.61–184.34 (m, 1F). IR (KBr): 3031, 2940, 2865, 1606, 1490, 1442, 1164, 1037, 754, 698  $\text{cm}^{-1}$ . HRMS (EI) calcd. for  $\text{C}_{17}\text{H}_{19}\text{F}^+$  [ $\text{M}^+$ ]: 242.1471, found 242.1469.

#### 2,2'-(3-Fluoropentane-1,5-diyl)bis(methylbenzene) **4b**

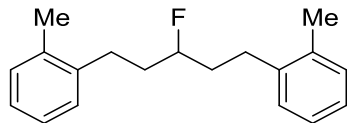

Colorless oil, 87% yield.  $^1\text{H}$  NMR (300 MHz,  $\text{CDCl}_3$ )  $\delta$  7.22–7.01 (m, 8H), 4.62–4.37 (m, 1H,  $^2J_{\text{H-F}} = 49.3$  Hz), 2.99–2.75 (m, 2H), 2.75–2.55 (m, 2H), 2.31 (s, 6H), 2.06–1.74 (m, 4H).  $^{13}\text{C}$  NMR (75 MHz,  $\text{CDCl}_3$ )  $\delta$  139.6, 135.8, 130.2, 128.8, 126.1, 126.0, 93.1 (d,  $J = 168.5$  Hz), 35.7 (d,  $J = 21.0$  Hz), 28.7 (d,  $J = 4.3$  Hz), 19.2.  $^{19}\text{F}$  NMR (282 MHz,  $\text{CDCl}_3$ )  $\delta$  -181.50–185.19 (m, 1F). IR (KBr): 3019, 2937, 2877, 1598, 1486, 1455, 1378, 1168, 1025, 738  $\text{cm}^{-1}$ . HRMS (EI) calcd. for  $\text{C}_{19}\text{H}_{23}\text{F}^+$  [ $\text{M}^+$ ]: 270.1784 found 270.1783.

#### 4,4'-(3-Fluoropentane-1,5-diyl)bis(methylbenzene) **4c**

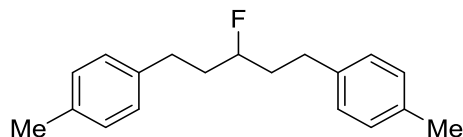

Colorless oil, 80% yield.  $^1\text{H}$  NMR (300 MHz,  $\text{CDCl}_3$ )  $\delta$  7.18–6.96 (m, 8H), 4.62–4.37 (m, 1H,  $^2J_{\text{H-F}} = 49.3$  Hz), 2.87–2.70 (m, 2H), 2.69–2.56 (m, 2H), 2.32 (s, 6H), 2.12–1.77 (m, 4H).  $^{13}\text{C}$  NMR (75 MHz,  $\text{CDCl}_3$ )  $\delta$  138.3, 135.3, 129.1, 128.3, 92.8 (d,  $J = 168.0$  Hz), 37.1 (d,  $J = 20.9$  Hz), 30.9 (d,  $J = 4.4$  Hz), 20.9.  $^{19}\text{F}$  NMR (282 MHz,  $\text{CDCl}_3$ )  $\delta$  -177.86–191.48 (m, 1F). IR (KBr): 3008, 2940, 2861, 1515, 1442, 1375, 1041, 892, 806  $\text{cm}^{-1}$ . HRMS (EI) calcd. for  $\text{C}_{19}\text{H}_{23}\text{F}^+$  [ $\text{M}^+$ ]: 270.1784 found 270.1789.

4,4'-(3-Fluoropentane-1,5-diyl)bis(ethylbenzene) **4d**

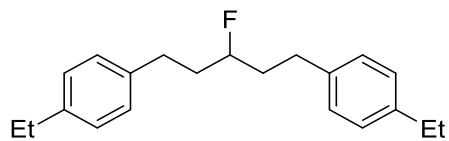

Colorless oil, 87% yield.  $^1\text{H NMR}$  (300 MHz,  $\text{CDCl}_3$ )  $\delta$  7.20–6.98 (m, 8H), 4.68–4.39 (m, 1H,  $^2J_{\text{H-F}} = 49.3$  Hz), 2.92–2.58 (m, 8H), 2.16–1.79 (m, 4H), 1.23 (t,  $J = 7.6$  Hz, 6H).  $^{13}\text{C NMR}$  (75 MHz,  $\text{CDCl}_3$ )  $\delta$  141.8, 138.6, 128.3, 127.9, 92.8 (d,  $J = 168.0$  Hz), 37.1 (d,  $J = 20.9$  Hz), 30.9 (d,  $J = 4.4$  Hz), 28.4, 15.7.  $^{19}\text{F NMR}$  (282 MHz,  $\text{CDCl}_3$ )  $\delta$  -178.72–187.28 (m, 1F). IR (KBr): 3016, 2498, 2873, 1519, 1438, 1378, 1037, 898, 838  $\text{cm}^{-1}$ . HRMS (EI) calcd. for  $\text{C}_{21}\text{H}_{27}\text{F}^+$  [ $\text{M}^+$ ]: 298.2097 found 298.2098.

4,4'-(3-Fluoropentane-1,5-diyl)bis(butylbenzene) **4e**

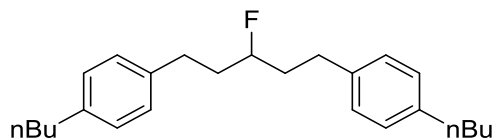

Colorless oil, 78% yield.  $^1\text{H NMR}$  (300 MHz,  $\text{CDCl}_3$ )  $\delta$  7.16–6.97 (m, 8H), 4.62–4.39 (m, 1H,  $^2J_{\text{H-F}} = 49.3$  Hz), 2.86–2.71 (m, 2H), 2.69–2.49 (m, 6H), 2.01–1.86 (m, 4H), 1.66–1.53 (m, 4H), 1.43–1.21 (m, 4H), 0.92 (t,  $J = 7.3$  Hz, 6H).  $^{13}\text{C NMR}$  (75 MHz,  $\text{CDCl}_3$ )  $\delta$  140.5, 138.5, 128.4, 128.2, 92.8 (d,  $J = 168.0$  Hz), 37.0 (d,  $J = 20.9$  Hz), 35.2, 33.7, 30.9 (d,  $J = 4.5$  Hz), 22.3, 13.9.  $^{19}\text{F NMR}$  (282 MHz,  $\text{CDCl}_3$ )  $\delta$  -172.31–193.10 (m, 1F). IR (KBr): 3019, 2940, 2857, 1511, 1455, 1375, 1045, 902, 825  $\text{cm}^{-1}$ . HRMS (EI) calcd. for  $\text{C}_{25}\text{H}_{35}\text{F}^+$  [ $\text{M}^+$ ]: 354.2723 found 354.2726.

4,4'-(3-Fluoropentane-1,5-diyl)bis(methoxybenzene) **4f**

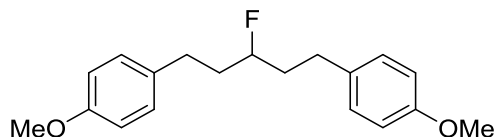

Colorless oi, 70% yield.  $^1\text{H NMR}$  (300 MHz,  $\text{CDCl}_3$ )  $\delta$  7.09 (d,  $J = 8.5$  Hz, 2H), 6.83 (d,  $J = 8.5$  Hz, 2H), 4.60–4.35 (m, 1H,  $^2J_{\text{H-F}} = 49.3$  Hz), 3.79 (s, 6H), 2.75–2.61 (m, 4H), 1.99–1.67 (m, 4H).  $^{13}\text{C NMR}$  (75 MHz,  $\text{CDCl}_3$ )  $\delta$  157.7, 133.4, 129.3, 113.7, 92.6 (d,  $J = 167.8$  Hz), 55.2 (s), 37.2 (d,  $J = 20.8$  Hz), 30.4 (d,  $J = 4.4$  Hz).  $^{19}\text{F NMR}$  (282 MHz,  $\text{CDCl}_3$ )  $\delta$  -172.79–190.80 (m, 1F). IR (KBr): 2940, 2836, 1610, 1587, 1523, 1459, 1303, 1240, 1172, 1033, 829  $\text{cm}^{-1}$ . HRMS (EI) calcd. for  $\text{C}_{19}\text{H}_{23}\text{FO}_2^+$  [ $\text{M}^+$ ]: 302.1682 found 302.1687.

2,2'-(3-Fluoropentane-1,5-diyl)bis(bromobenzene) **4g**

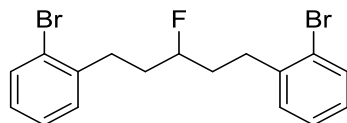

White solid, mp = 36–37  $^{\circ}\text{C}$ , 52% yield.  $^1\text{H NMR}$  (300 MHz,  $\text{CDCl}_3$ )  $\delta$  7.53 (d,  $J = 7.9$  Hz, 2H), 7.32–7.13



(m, 4H), 7.13–6.97 (m, 2H), 4.68–4.43 (m, 1H,  $^2J_{H-F} = 49.3$  Hz), 3.09–2.81 (m, 4H), 2.03–1.75 (m, 4H).  $^{13}\text{C}$  NMR (75 MHz,  $\text{CDCl}_3$ )  $\delta$  140.6, 132.8, 131.8, 127.7, 127.5, 124.3, 92.6 (d,  $J = 169.1$  Hz), 35.0 (d,  $J = 20.9$  Hz), 31.8 (d,  $J = 4.5$  Hz).  $^{19}\text{F}$  NMR (282 MHz,  $\text{CDCl}_3$ )  $\delta$  -174.86–190.11 (m, 1F). IR (KBr): 3060, 2944, 2833, 1698, 1562, 1455, 1022, 881, 655  $\text{cm}^{-1}$ . HRMS (EI) calcd. for  $\text{C}_{17}\text{H}_{17}\text{Br}_2\text{F}^+$  [ $\text{M}^+$ ]: 397.9681 found 397.9685.

2,2'-(3-Fluoropentane-1,5-diyl)bis(chlorobenzene) **4h**

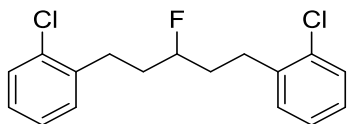

Colorless oil, 86% yield.  $^1\text{H}$  NMR (300 MHz,  $\text{CDCl}_3$ )  $\delta$  7.48–7.29 (m, 2H), 7.28–7.02 (m, 6H), 4.63–4.41 (m, 1H,  $^2J_{H-F} = 49.3$  Hz), 3.03–2.95 (m, 4H), 2.02–1.74 (m, 4H).  $^{13}\text{C}$  NMR (75 MHz,  $\text{CDCl}_3$ )  $\delta$  138.9, 133.8, 130.5, 129.5, 127.5, 126.8, 92.7 (d,  $J = 169.0$  Hz), 34.9 (d,  $J = 20.9$  Hz), 29.3 (d,  $J = 4.6$  Hz).  $^{19}\text{F}$  NMR (282 MHz,  $\text{CDCl}_3$ )  $\delta$  -179.97–189.12 (m, 1F). IR (KBr): 3068, 2933, 2869, 1575, 1448, 1475, 1378, 1134, 1045, 892, 750, 678  $\text{cm}^{-1}$ . HRMS (EI) calcd. for  $\text{C}_{17}\text{H}_{17}\text{Cl}_2\text{F}^+$  [ $\text{M}^+$ ]: 310.0691 found 310.0696.

4,4'-(3-Fluoropentane-1,5-diyl)bis(fluorobenzene) **4i**

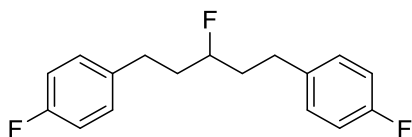

Colorless oil, 75% yield.  $^1\text{H}$  NMR (300 MHz,  $\text{CDCl}_3$ )  $\delta$  7.21–7.06 (m, 4H), 7.03–6.87 (m, 4H), 4.58–4.33 (m, 1H,  $^2J_{H-F} = 49.1$  Hz), 2.78–2.60 (m, 4H), 2.06–1.75 (m, 4H).  $^{13}\text{C}$  NMR (75 MHz,  $\text{CDCl}_3$ )  $\delta$  161.31 (d,  $J = 243.6$  Hz), 136.95 (d,  $J = 3.2$  Hz), 129.75 (d,  $J = 7.8$  Hz), 115.19 (d,  $J = 21.1$  Hz), 92.30 (d,  $J = 168.5$  Hz), 37.10 (d,  $J = 21.0$  Hz), 30.57 (d,  $J = 4.4$  Hz).  $^{19}\text{F}$  NMR (282 MHz,  $\text{CDCl}_3$ )  $\delta$  -117.85 (s, 2F), -180.69–190.67 (m, 1F). IR (KBr): 3031, 2940, 2861, 1610, 1502, 1438, 1232, 1037, 829  $\text{cm}^{-1}$ . HRMS (EI) calcd. for  $\text{C}_{17}\text{H}_{17}\text{F}_3^+$  [ $\text{M}^+$ ]: 278.1282 found 278.1282.

2,2'-(3-Fluoropentane-1,5-diyl)bis(fluorobenzene) **4j**

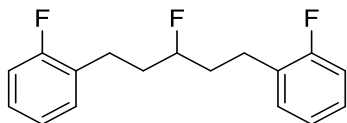

Colorless oil, 90% yield.  $^1\text{H}$  NMR (300 MHz,  $\text{CDCl}_3$ )  $\delta$  7.24–7.12 (m, 4H), 7.11–6.97 (m, 4H), 4.61–4.40 (m, 1H,  $^2J_{H-F} = 49.3$  Hz), 2.90–2.67 (m, 4H), 2.02–1.74 (m, 4H).  $^{13}\text{C}$  NMR (75 MHz,  $\text{CDCl}_3$ )  $\delta$  161.1 (d,  $J = 244.8$  Hz), 130.7 (d,  $J = 5.0$  Hz), 128.1 (d,  $J = 15.8$  Hz), 127.7 (d,  $J = 8.1$  Hz), 123.9 (d,  $J = 3.5$  Hz), 115.6 (d,  $J = 22.0$  Hz), 92.7 (d,  $J = 168.7$  Hz), 35.4 (d,  $J = 20.9$  Hz), 24.9 (d,  $J = 2.5$  Hz).  $^{19}\text{F}$  NMR (282 MHz,  $\text{CDCl}_3$ )  $\delta$  -119.37 (s, 2F), -179.94–190.41 (m, 1F). IR (KBr): 2940, 2873, 1587, 1498, 1452, 1232, 1191, 1033, 750  $\text{cm}^{-1}$ . HRMS (EI) calcd. for  $\text{C}_{17}\text{H}_{17}\text{F}_3^+$  [ $\text{M}^+$ ]: 278.1282 found 278.1288.

4,4'-(3-Fluoropentane-1,5-diyl)bis(1,3-dimethylbenzene) **4k**

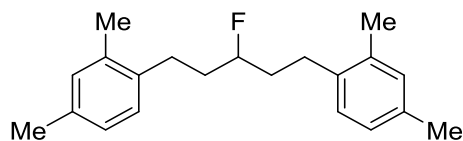

Semi-solid, 65% yield.  $^1\text{H}$  NMR (300 MHz,  $\text{CDCl}_3$ )  $\delta$  7.07–6.91 (m, 6H), 4.66–4.41 (m, 1H,  $^2J_{\text{H-F}} = 49.4$  Hz), 2.83–2.72 (m, 2H), 2.70–2.56 (m, 2H), 2.29 (s, 6H), 2.27 (s, 6H), 1.99–1.67 (m, 4H).  $^{13}\text{C}$  NMR (75 MHz,  $\text{CDCl}_3$ )  $\delta$  136.6, 135.7, 135.5, 131.1, 128.8, 126.6, 93.2 (d,  $J = 168.3$  Hz), 35.9 (d,  $J = 21.0$  Hz), 28.3 (d,  $J = 4.2$  Hz), 20.9, 19.1.  $^{19}\text{F}$  NMR (282 MHz,  $\text{CDCl}_3$ )  $\delta$  -182.74–-183.43 (m, 1F). IR (KBr): 3008, 2952, 2819, 1606, 1515, 1448, 1375, 1037, 862, 813  $\text{cm}^{-1}$ . HRMS (EI) calcd. for  $\text{C}_{21}\text{H}_{27}\text{F} + [\text{M}^+]$ : 298.2097 found 298.2094.

3,3'-(3-Fluoropentane-1,5-diyl)bis(1,2-dimethylbenzene) **4l**

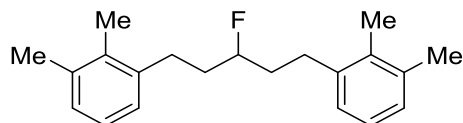

White solid, mp = 36–38 °C, 77% yield.  $^1\text{H}$  NMR (300 MHz,  $\text{CDCl}_3$ )  $\delta$  7.06–6.83 (m, 6H), 4.66–4.44 (m, 1H,  $^2J_{\text{H-F}} = 49.1$  Hz), 3.01–2.80 (m, 2H), 2.75–2.60 (m, 2H), 2.28 (s, 6H), 2.21 (s, 6H), 1.96–1.64 (m, 4H).  $^{13}\text{C}$  NMR (75 MHz,  $\text{CDCl}_3$ )  $\delta$  139.5, 136.9, 134.4, 127.9, 126.9, 125.4, 93.2 (d,  $J = 168.2$  Hz), 36.1 (d,  $J = 20.8$  Hz), 29.4 (d,  $J = 3.8$  Hz), 20.7, 14.9.  $^{19}\text{F}$  NMR (282 MHz,  $\text{CDCl}_3$ )  $\delta$  -173.12–-190.67 (m, 1F). IR (KBr): 3019, 2937, 1594, 1455, 1375, 1172, 1029, 889  $\text{cm}^{-1}$ . HRMS (EI) calcd. for  $\text{C}_{21}\text{H}_{27}\text{F} + [\text{M}^+]$ : 298.2097 found 298.2096.

2,2'-(3-Fluoropentane-1,5-diyl)dinaphthalene **4m**

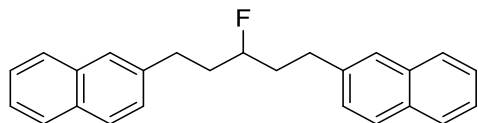

White solid, mp = 90–92 °C, 41% yield.  $^1\text{H}$  NMR (300 MHz,  $\text{CDCl}_3$ )  $\delta$  7.89–7.68 (m, 6H), 7.60 (s, 2H), 7.49–7.37 (m, 4H), 7.31 (d,  $J = 8.4$  Hz, 2H), 4.65–4.47 (m, 1H,  $^2J_{\text{H-F}} = 49.3$  Hz), 3.08–2.83 (m, 4H), 2.12–1.87 (m, 4H).  $^{13}\text{C}$  NMR (75 MHz,  $\text{CDCl}_3$ )  $\delta$  138.8, 133.5, 131.9, 128.0, 127.5, 127.3, 127.1, 126.4, 125.9, 125.2, 92.6 (d,  $J = 168.2$  Hz), 36.8 (d,  $J = 21.0$  Hz), 31.5 (d,  $J = 4.3$  Hz).  $^{19}\text{F}$  NMR (282 MHz,  $\text{CDCl}_3$ )  $\delta$  -182.84–-185.18 (m, 1F). IR (KBr): 3062, 2940, 1639, 1587, 1511, 1060, 862, 732  $\text{cm}^{-1}$ . HRMS (EI) calcd. for  $\text{C}_{25}\text{H}_{23}\text{F} + [\text{M}^+]$ : 342.1784 found 342.1786.

(2-Fluorobutane-1,4-diyl)dibenzene **4n**

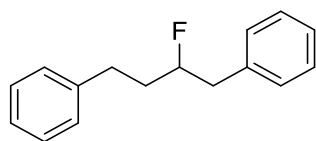

White solid, mp = 30–31 °C, 70% yield.  $^1\text{H}$  NMR (300 MHz,  $\text{CDCl}_3$ )  $\delta$  7.34–7.23 (m, 4H), 7.24–7.11 (m, 6H), 4.87–4.60 (m, 1H,  $^2J_{\text{H-F}} = 48.8$  Hz), 3.06–2.80 (m, 3H), 2.76–2.59 (m, 1H), 2.02–1.80 (m, 2H).  $^{13}\text{C}$  NMR (75 MHz,  $\text{CDCl}_3$ )  $\delta$  129.3, 128.4, 126.5, 125.9, 93.5 (d,  $J = 171.3$  Hz), 41.6 (d,  $J = 21.4$  Hz), 36.4 (d,  $J = 20.9$  Hz), 31.3 (d,  $J = 4.2$  Hz).  $^{19}\text{F}$  NMR (282 MHz,  $\text{CDCl}_3$ )  $\delta$  -180.42–181.31 (m, 1F). IR (KBr): 3031, 2952, 2865, 1598, 1498, 1442, 1072, 838, 738, 694  $\text{cm}^{-1}$ . HRMS (EI) calcd. for  $\text{C}_{16}\text{H}_{17}\text{F}^+ [\text{M}^+]$ : 228.1314 found 228.1317.

(3-Fluoro-6-methylheptyl)benzene **4p**

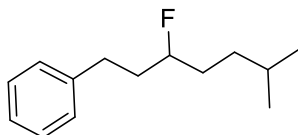

Colorless oil, 55% yield.  $^1\text{H}$  NMR (300 MHz,  $\text{CDCl}_3$ )  $\delta$  7.32–7.03 (m, 5H), 4.58–4.34 (m, 1H,  $^2J_{\text{H-F}} = 49.3$  Hz), 2.87–2.59 (m, 2H), 2.06–1.75 (m, 2H), 1.72–1.44 (m, 3H), 1.42–1.15 (m, 2H), 0.90 (s, 3H), 0.87 (s, 3H).  $^{13}\text{C}$  NMR (75 MHz,  $\text{CDCl}_3$ )  $\delta$  141.6, 128.43, 128.40, 125.8, 93.8 (d,  $J = 167.5$  Hz), 36.9 (d,  $J = 21.1$  Hz), 34.0 (d,  $J = 4.3$  Hz), 33.0 (d,  $J = 20.7$  Hz), 31.4 (d,  $J = 4.3$  Hz), 27.9, 22.4 (d,  $J = 6.3$  Hz).  $^{19}\text{F}$  NMR (282 MHz,  $\text{CDCl}_3$ )  $\delta$  -177.27–184.97 (m, 1F). IR (KBr): 3023, 2944, 2864, 1590, 1494, 1463, 1382, 1060, 741, 698  $\text{cm}^{-1}$ . HRMS (EI) calcd. for  $\text{C}_{14}\text{H}_{21}\text{F}^+ [\text{M}^+]$ : 208.1627 found 208.1635

(4-Fluorohexyl)benzene **4r**

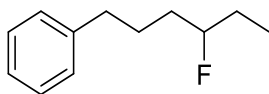

Colorless oil, 70% yield.  $^1\text{H}$  NMR (300 MHz,  $\text{CDCl}_3$ )  $\delta$  7.33–7.24 (m, 2H), 7.23–7.13 (m, 3H), 4.59–4.28 (m, 1H,  $^2J_{\text{H-F}} = 49.3$  Hz), 2.65 (t,  $J = 7.3$  Hz, 2H), 1.89–1.45 (m, 6H), 0.95 (t,  $J = 7.4$  Hz, 3H).  $^{13}\text{C}$  NMR (75 MHz,  $\text{CDCl}_3$ )  $\delta$  142.1, 128.3, 128.2, 125.7, 95.5 (d,  $J = 167.4$  Hz), 35.6, 34.2 (d,  $J = 21.0$  Hz), 28.0 (d,  $J = 21.5$  Hz), 26.9 (d,  $J = 4.1$  Hz), 9.4 (d,  $J = 5.8$  Hz).  $^{19}\text{F}$  NMR (282 MHz,  $\text{CDCl}_3$ )  $\delta$  -181.54–182.72 (m, 1F). IR (KBr): 3027, 2933, 2819, 1606, 1494, 1463, 1363, 1097, 944, 709  $\text{cm}^{-1}$ . HRMS (EI) calcd. for  $\text{C}_{12}\text{H}_{17}\text{F}^+ [\text{M}^+]$ : 180.1314 found 180.1322.

(4-Fluorooctyl)benzene **4s**

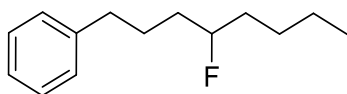

Colorless oil, 53% yield.  $^1\text{H}$  NMR (300 MHz,  $\text{CDCl}_3$ )  $\delta$  7.33–7.24 (m, 2H), 7.22–7.15 (m, 3H), 4.58–4.37 (m, 1H,  $^2J_{\text{H-F}} = 49.3$  Hz), 2.64 (t,  $J = 7.3$  Hz, 2H), 1.82–1.45 (m, 6H), 1.44–1.22 (m, 4H), 0.90 (t,  $J = 6.9$  Hz, 3H).  $^{13}\text{C}$  NMR (75 MHz,  $\text{CDCl}_3$ )  $\delta$  142.1, 128.3, 128.2, 125.7, 94.3 (d,  $J = 166.8$  Hz), 35.6, 34.8 (d,  $J = 11.5$  Hz), 34.6 (d,  $J = 11.7$  Hz), 27.2 (d,  $J = 4.4$  Hz), 26.9 (d,  $J = 4.2$  Hz), 22.5, 13.9.  $^{19}\text{F}$  NMR (282 MHz,  $\text{CDCl}_3$ )  $\delta$  -180.40–181.34 (m, 1F). IR (KBr): 3019, 2937, 2865, 1602, 1494, 1448, 1378, 1022, 764, 690  $\text{cm}^{-1}$ . HRMS

(EI) calcd. for  $C_{14}H_{21}F^+$  [ $M^+$ ]: 208.1627 found 208.1622

**Synthesis of compound 1v-y, 3x and 3y, related to Table 2.**

In Table 2, substrates such as 1,5-diphenylpentan-3-one (**1v**), (3,3-dimethoxypentane-1,5-diyl)dibenzene (**1w**), (3,3-dichloropentane-1,5-diyl)dibenzene (**1x**), (3,3-dibromopentane-1,5-diyl)dibenzene (**1y**) and elimination product (3-chloropent-2-ene-1,5-diyl)dibenzene (**3x**), were known compounds, and were synthesized followed literature report (Blümel et al., 2018; Takeda et al., 1997; Mukaiyama et al., 1973).

(3-bromopent-2-ene-1,5-diyl)dibenzene (**3y**) was new compound, as yellow oil. The *Z/E* ratio (10:1) was determined by  $^1H$ -NMR. HRMS (EI) calcd. for  $C_{17}H_{17}Br^+$  [ $M^+$ ]: 300.0514, found 300.0518.  $^1H$  NMR (300 MHz,  $CDCl_3$ )  $\delta$  7.32–7.15 (m, 8H), 7.06 (d,  $J = 6.8$  Hz, 2H), 5.72 (t,  $J = 7.0$  Hz, 1H), 3.48 (d,  $J = 6.9$  Hz, 2H), 2.93–2.83 (m, 2H), 2.83–2.71 (m, 2H).  $^{13}C$  NMR (126 MHz,  $CDCl_3$ )  $\delta$  140.4, 139.2, 128.6, 128.4, 128.34, 128.31, 128.13, 128.12, 126.1, 126.0, 43.4, 37.5, 34.4. IR (KBr): 3019, 2921, 2844, 1654, 1598, 1490, 1452, 1081, 686  $cm^{-1}$ .

## Supplemental References

Nahra, F., Patrick, S.R., Bello, D., Brill, M., Obled, A., Cordes, D.B., Slawin, A.M.Z., O'Hagan, D., and Nolan, S.P. (2015). Hydrofluorination of Alkynes Catalysed by Gold Bifluorides. *ChemCatChem* 7, 240-244.

Yang, M.-H., Matikonda, S. S., and Altman, R. A. (2013). Preparation of Fluoroalkenes via the Shapiro Reaction: Direct Access to Fluorinated Peptidomimetics. *Org. Lett.* 15, 3894-3897.

Zhang, W., Huang, W., and Hu, J. (2009). Highly Stereoselective Synthesis of Monofluoroalkenes from  $\alpha$ -Fluorosulfoximines and Nitrones. *Angew. Chem. Int. Ed.* 48, 9858-9861.

Vandamme, M., and Paquin, J.-F. (2017). Eliminative Deoxofluorination Using XtalFluor-E: A One-Step Synthesis of Monofluoroalkenes from Cyclohexanone Derivatives. *Org. Lett.* 19, 3604-3607.

Khalaf, A. A., and Roberts, R. M. (1972). Friedel-Crafts cycloalkylations of certain mono- and diphenyl-substituted alcohols and alkyl chlorides. *J. Org. Chem.* 37, 4227.

Adamczyk, M., Watt, D. S., and Netzel, D. A. (1984). Synthesis of biological markers in fossil fuels. 2. Synthesis and carbon-13 NMR studies of substituted indans and tetralins. *J. Org. Chem.* 49, 4226-4237.

Léonard, N. G., and Chirik, P. J. (2018). Air-Stable  $\alpha$ -Diimine Nickel Precatalysts for the Hydrogenation of Hindered, Unactivated Alkenes. *ACS Catal.* 8, 342-348.

Michelet, B., Bour, C., and Gandon, V. (2014). Gallium-Assisted Transfer Hydrogenation of Alkenes. *Chem. Eur. J.* 20, 14488-14492.

Umemoto, T., Singh, R. P., Xu, Y., and Saito, N. (2010). Discovery of 4-tert-Butyl-2,6-dimethylphenylsulfur Trifluoride as a Deoxofluorinating Agent with High Thermal Stability as Well as Unusual Resistance to Aqueous Hydrolysis, and Its Diverse Fluorination Capabilities Including Deoxofluoro-Arylsulfonylation with High Stereoselectivity. *J. Am. Chem. Soc.* 132, 18199-18205.

Blümel, M., Nagasawa, S., Blackford, K., Hare, S.R., Tantillo, D.J., and Sarpong, R. (2018). Rearrangement of Hydroxylated Pinene Derivatives to Fenchone-Type Frameworks: Computational Evidence for Dynamically-Controlled Selectivity. *J. Am. Chem. Soc.* 140, 9291-9298.

Takeda, T., Sasaki, R., Yamauchi, S., and Fujiwara, T. (1997). Transformation of ketones and aldehydes to gem-dihalides via hydrazones using copper(II) halides. *Tetrahedron* 53, 557-566.

Mukaiyama, T., Imamoto, T., and Kobayashi, S. (1973). Convenient method for the hydrolysis of vinyl chlorides to ketones. *Chem. Lett.* 2, 261-264.
